# Supplementary material
Source: publisher figshare collection journal article supplement (https://acs.figshare.com/ndownloader/files/3845023)
Supplement: Supplementary file 1 [file 3845023]

## Sheet: Single protein
Supplemental Table S6. Structural information at single protein level
UNIPROT_AC	UNIPROT_ID	ORF	RANK_MAJOR	RANK_MINOR	TYPE	PDB_ID	CHAIN	SEQ_IDENT	COVERAGE	SEQ_BEGIN	SEQ_END	GA431	MPQS	ZDOPE	FILENAME
P40582	GST1_YEAST	YIR038C	1	0	Model	3lsz	A	29	96.6	6	231	1	1.17	0.26	P40582-MDL-P40582.13-3lsz_A.pdb
P40582	GST1_YEAST	YIR038C	2	0	Model	1m0u	A	22	94.9	6	227	1	1.16	-0.58	P40582-MDL-P40582.3-1m0u_A.pdb
P40582	GST1_YEAST	YIR038C	3	0	Model	1axd	A	20	94.4	3	223	1	1.25	-1.09	P40582-MDL-P40582.26-1axd_A.pdb
P40582	GST1_YEAST	YIR038C	4	0	Model	3gx0	A	20	94	5	224	1	1.187	-0.46	P40582-MDL-P40582.19-3gx0_A.pdb
P40582	GST1_YEAST	YIR038C	5	0	Model	1g6w	A	17	95.3	3	225	1	1.193	-0.5	P40582-MDL-P40582.30-1g6w_A.pdb
P40582	GST1_YEAST	YIR038C	6	0	Model	2dsa	A	16	95.3	6	228	1	1.108	-0.76	P40582-MDL-P40582.20-2dsa_A.pdb
P38626	NCB5R_YEAST	YIL043C	1	0	Model	2eix	A	46	84.9	28	268	1	1.496	-1.15	P38626-MDL-P38626.3-2eix_A.pdb
P38626	NCB5R_YEAST	YIL043C	2	0	Model	1qx4	A	37	82.8	38	272	1	1.288	-1.23	P38626-MDL-P38626.1-1qx4_A.pdb
P38626	NCB5R_YEAST	YIL043C	3	1	Model	2cnd		46	0.8	45	256	1	1.21	-1.21	P38626-MDL-P38626.7-2cnd_.pdb
P38626	NCB5R_YEAST	YIL043C	4	1	Model	1i7p	A	37	0.9	31	284	1	0	0	P38626-MDL-P38626.8-1i7p_A.pdb
P38626	NCB5R_YEAST	YIL043C	5	1	Model	1ndh		36	0.9	32	284	1	0	0	P38626-MDL-P38626.10-1ndh_.pdb
P38626	NCB5R_YEAST	YIL043C	6	1	Model	1ndh		37	0.9	40	284	1	0	0	P38626-MDL-P38626.5-1ndh_.pdb
P38626	NCB5R_YEAST	YIL043C	7	1	Model	1qx4	A	37	0.8	41	276	1	1.27	-1.64	P38626-MDL-P38626.6-1qx4_A.pdb
P43588	RPN11_YEAST	YFR004W	1	0	Structure	4b4t	V	89	94.8	17	306	-1	-1	-1	P43588-EXP-4b4t_V.pdb
P43588	RPN11_YEAST	YFR004W	2	0	Structure	4bgr	V	89	94.8	17	306	-1	-1	-1	P43588-EXP-4bgr_V.pdb
P32368	SAC1_YEAST	YKL212W	1	1	Structure	3lwt	X	100	73.2	1	456	-1	-1	-1	P32368-EXP-3lwt_X.pdb
P10823	GPA2_YEAST	YER020W	1	0	Model	1agr	A	43	81.1	84	447	1	1.176	-1.25	P10823-MDL-P10823.1-1agr_A.pdb
P10823	GPA2_YEAST	YER020W	2	1	Model	2ode	A	45	71.3	123	442	1	1.411	-1.76	P10823-MDL-P10823.5-2ode_A.pdb
P10823	GPA2_YEAST	YER020W	3	1	Model	1got	A	41	76.8	97	441	1	0	0	P10823-MDL-P10823.8-1got_A.pdb
P10823	GPA2_YEAST	YER020W	4	1	Model	2bcj	Q	44	71.7	122	443	1	1.43	-2.01	P10823-MDL-P10823.3-2bcj_Q.pdb
P10823	GPA2_YEAST	YER020W	5	1	Model	2ode	A	44	71.3	123	442	1	1.232	-1.81	P10823-MDL-P10823.2-2ode_A.pdb
P10823	GPA2_YEAST	YER020W	6	1	Model	1cip	A	44	71.3	122	441	1	1.45	-2.28	P10823-MDL-P10823.6-1cip_A.pdb
P10823	GPA2_YEAST	YER020W	7	1	Model	1cip	A	44	71.3	122	441	1	0	0	P10823-MDL-P10823.7-1cip_A.pdb
P10823	GPA2_YEAST	YER020W	8	1	Model	1got	A	43	71.1	122	440	1	0	0	P10823-MDL-P10823.10-1got_A.pdb
P10823	GPA2_YEAST	YER020W	9	1	Model	1azs	C	36	72.4	122	446	1	0	0	P10823-MDL-P10823.9-1azs_C.pdb
Q12335	PST2_YEAST	YDR032C	1	0	Model	2rg1	A	49	94.4	3	189	1	1.367	-0.33	Q12335-MDL-Q12335.7-2rg1_A.pdb
Q12335	PST2_YEAST	YDR032C	2	0	Model	3b6i	A	46	99	2	197	1	1.631	-1.11	Q12335-MDL-Q12335.10-3b6i_A.pdb
Q12335	PST2_YEAST	YDR032C	3	0	Model	1zwl	A	38	99	2	197	1	1.353	-0.51	Q12335-MDL-Q12335.1-1zwl_A.pdb
Q12335	PST2_YEAST	YDR032C	4	0	Model	1zwk	A	38	99	2	197	1	1.339	-0.47	Q12335-MDL-Q12335.16-1zwk_A.pdb
Q12335	PST2_YEAST	YDR032C	5	0	Model	2a5l	A	38	99	2	197	1	1.41	-1.3	Q12335-MDL-Q12335.15-2a5l_A.pdb
Q12335	PST2_YEAST	YDR032C	6	0	Model	1zwl	A	36	99.5	2	198	1	0	0	Q12335-MDL-Q12335.6-1zwl_A.pdb
Q12335	PST2_YEAST	YDR032C	7	0	Model	2zki	A	34	100	1	198	1	1.408	-0.63	Q12335-MDL-Q12335.12-2zki_A.pdb
Q12335	PST2_YEAST	YDR032C	8	0	Model	1zwk	A	34	99.5	2	198	1	0	0	Q12335-MDL-Q12335.2-1zwk_A.pdb
Q12335	PST2_YEAST	YDR032C	9	0	Model	1ydg	A	30	99	3	198	1	1.44	-1.41	Q12335-MDL-Q12335.14-1ydg_A.pdb
Q12335	PST2_YEAST	YDR032C	10	0	Model	1ydg	A	30	99	2	197	1	1.367	-0.81	Q12335-MDL-Q12335.11-1ydg_A.pdb
P32445	RIM1_YEAST	YCR028C-A	1	0	Model	1ue1	A	25	82.2	22	132	1	1.119	-0.45	P32445-MDL-P32445.6-1ue1_A.pdb
P01123	YPT1_YEAST	YFL038C	1	0	Structure	1ukv	Y	100	95.1	3	198	-1	-1	-1	P01123-EXP-1ukv_Y.pdb
P01123	YPT1_YEAST	YFL038C	2	0	Structure	2bcg	Y	100	94.2	3	196	-1	-1	-1	P01123-EXP-2bcg_Y.pdb
P01123	YPT1_YEAST	YFL038C	3	0	Structure	3cue	R	97.1	83	4	174	-1	-1	-1	P01123-EXP-3cue_R.pdb
P01123	YPT1_YEAST	YFL038C	4	0	Structure	3cue	L	97.1	83	4	174	-1	-1	-1	P01123-EXP-3cue_L.pdb
P01123	YPT1_YEAST	YFL038C	5	0	Structure	3cue	X	97.1	83	4	174	-1	-1	-1	P01123-EXP-3cue_X.pdb
P01123	YPT1_YEAST	YFL038C	6	0	Structure	3cue	F	97.1	83	4	174	-1	-1	-1	P01123-EXP-3cue_F.pdb
P01123	YPT1_YEAST	YFL038C	7	0	Structure	1yzn	A	100	82.5	3	172	-1	-1	-1	P01123-EXP-1yzn_A.pdb
P01123	YPT1_YEAST	YFL038C	8	0	Model	1i2m	A	30	83	7	177	1	0	0	P01123-MDL-P01123.8-1i2m_A.pdb
P01123	YPT1_YEAST	YFL038C	9	0	Model	1a2k	C	27	94.7	6	200	1	1.238	-0.5	P01123-MDL-P01123.9-1a2k_C.pdb
P00401	COX1_YEAST	Q0045	1	0	Model	1v54	A	60	99.1	2	530	1	1.97	-3.36	P00401-MDL-P00401.8-1v54_A.pdb
P00401	COX1_YEAST	Q0045	2	0	Model	2dyr	A	59	100	1	534	1	1.536	-0.95	P00401-MDL-P00401.15-2dyr_A.pdb
P00401	COX1_YEAST	Q0045	3	0	Model	2dyr	A	59	99.8	2	534	1	1.71	-0.94	P00401-MDL-P00401.5-2dyr_A.pdb
P00401	COX1_YEAST	Q0045	4	0	Model	2dyr	A	59	99.1	2	530	1	1.734	-1.01	P00401-MDL-P00401.17-2dyr_A.pdb
P00401	COX1_YEAST	Q0045	5	0	Model	2dyr	A	59	99.1	2	530	1	1.73	-0.97	P00401-MDL-P00401.13-2dyr_A.pdb
P00401	COX1_YEAST	Q0045	6	0	Model	1v54	A	59	99.1	2	530	1	1.97	-3.33	P00401-MDL-P00401.7-1v54_A.pdb
P00401	COX1_YEAST	Q0045	7	0	Model	1ar1	A	54	98.9	2	529	1	0	0	P00401-MDL-P00401.3-1ar1_A.pdb
P00401	COX1_YEAST	Q0045	8	0	Model	1ar1	a	54	98.9	2	529	1	0	0	P00401-MDL-P00401.12-1ar1_a.pdb
P00401	COX1_YEAST	Q0045	9	0	Model	2gsm	A	54	98.3	3	527	1	1.63	-1.22	P00401-MDL-P00401.4-2gsm_A.pdb
P00401	COX1_YEAST	Q0045	10	0	Model	2gsm	a	54	98.3	3	527	1	0	0	P00401-MDL-P00401.9-2gsm_a.pdb
P00401	COX1_YEAST	Q0045	11	0	Model	2gsm	A	54	98.3	3	527	1	0	0	P00401-MDL-P00401.2-2gsm_A.pdb
P00401	COX1_YEAST	Q0045	12	0	Model	3dtu	C	54	98.1	4	527	1	1.635	-1.22	P00401-MDL-P00401.11-3dtu_C.pdb
P00401	COX1_YEAST	Q0045	13	0	Model	2dyr	A	53	99.8	2	534	1	1.55	-0.84	P00401-MDL-P00401.6-2dyr_A.pdb
P00401	COX1_YEAST	Q0045	14	0	Model	1m56	G	53	99.6	1	532	1	0	0	P00401-MDL-P00401.10-1m56_G.pdb
P00410	COX2_YEAST	Q0250	1	0	Model	2dyr	B	44	90.8	20	247	0.76	1.286	0.91	P00410-MDL-P00410.6-2dyr_B.pdb
P00410	COX2_YEAST	Q0250	2	0	Model	1v54	B	44	90.8	20	247	0.71	1.41	-0.39	P00410-MDL-P00410.8-1v54_B.pdb
P00410	COX2_YEAST	Q0250	3	0	Model	1v54	B	43	92.8	18	250	0.98	1.43	-0.42	P00410-MDL-P00410.1-1v54_B.pdb
P00410	COX2_YEAST	Q0250	4	0	Model	2dyr	B	43	92.8	19	251	0.97	1.318	0.84	P00410-MDL-P00410.10-2dyr_B.pdb
P00410	COX2_YEAST	Q0250	5	0	Model	2dyr	B	42	92.8	19	251	1	1.306	0.9	P00410-MDL-P00410.9-2dyr_B.pdb
P00410	COX2_YEAST	Q0250	6	0	Model	1ar1	B	36	96	9	249	0.98	0	0	P00410-MDL-P00410.5-1ar1_B.pdb
P00420	COX3_YEAST	Q0275	1	0	Model	1v54	C	47	96.7	9	268	1	1.76	-2.34	P00420-MDL-P00420.4-1v54_C.pdb
P00420	COX3_YEAST	Q0275	2	0	Model	2dyr	C	47	96.7	9	268	1	1.541	-0.12	P00420-MDL-P00420.2-2dyr_C.pdb
P00420	COX3_YEAST	Q0275	3	0	Model	2dyr	C	47	96.7	9	268	1	1.54	-0.17	P00420-MDL-P00420.6-2dyr_C.pdb
P00420	COX3_YEAST	Q0275	4	0	Model	2dyr	C	47	96.7	9	268	1	1.536	-0.08	P00420-MDL-P00420.7-2dyr_C.pdb
P00420	COX3_YEAST	Q0275	5	0	Model	1v54	C	45	96.7	9	268	1	0	0	P00420-MDL-P00420.3-1v54_C.pdb
P00420	COX3_YEAST	Q0275	6	0	Model	1v54	C	45	96.7	9	268	1	0	0	P00420-MDL-P00420.5-1v54_C.pdb
P00420	COX3_YEAST	Q0275	7	0	Model	2dyr	C	45	96.7	9	268	1	1.407	-0.15	P00420-MDL-P00420.9-2dyr_C.pdb
P00163	CYB_YEAST	Q0105	1	0	Structure	3cxh	C	100	100	1	385	-1	-1	-1	P00163-EXP-3cxh_C.pdb
P00163	CYB_YEAST	Q0105	2	0	Structure	3cx5	C	100	100	1	385	-1	-1	-1	P00163-EXP-3cx5_C.pdb
P00163	CYB_YEAST	Q0105	3	0	Structure	3cx5	N	100	100	1	385	-1	-1	-1	P00163-EXP-3cx5_N.pdb
P00163	CYB_YEAST	Q0105	4	0	Structure	3cxh	N	100	100	1	385	-1	-1	-1	P00163-EXP-3cxh_N.pdb
P00163	CYB_YEAST	Q0105	5	0	Structure	1ezv	C	99.7	100	1	385	-1	-1	-1	P00163-EXP-1ezv_C.pdb
P00163	CYB_YEAST	Q0105	6	0	Structure	1kyo	N	99.7	100	1	385	-1	-1	-1	P00163-EXP-1kyo_N.pdb
P00163	CYB_YEAST	Q0105	7	0	Structure	1kyo	C	99.7	100	1	385	-1	-1	-1	P00163-EXP-1kyo_C.pdb
P00163	CYB_YEAST	Q0105	8	0	Structure	1kb9	C	99.7	100	1	385	-1	-1	-1	P00163-EXP-1kb9_C.pdb
P00163	CYB_YEAST	Q0105	9	0	Structure	2ibz	C	99.7	100	1	385	-1	-1	-1	P00163-EXP-2ibz_C.pdb
P00163	CYB_YEAST	Q0105	10	0	Structure	1p84	C	99.7	100	1	385	-1	-1	-1	P00163-EXP-1p84_C.pdb
P00163	CYB_YEAST	Q0105	11	0	Model	1bcc	C	52	98.4	2	380	1	0	0	P00163-MDL-P00163.4-1bcc_C.pdb
P00163	CYB_YEAST	Q0105	12	0	Model	2a06	C	52	94.6	14	377	1	1.58	-0.3	P00163-MDL-P00163.2-2a06_C.pdb
P07256	QCR1_YEAST	YBL045C	1	0	Structure	1p84	A	99.8	94.3	27	457	-1	-1	-1	P07256-EXP-1p84_A.pdb
P07256	QCR1_YEAST	YBL045C	2	0	Structure	3cxh	A	99.8	94.3	27	457	-1	-1	-1	P07256-EXP-3cxh_A.pdb
P07256	QCR1_YEAST	YBL045C	3	0	Structure	2ibz	A	99.8	94.3	27	457	-1	-1	-1	P07256-EXP-2ibz_A.pdb
P07256	QCR1_YEAST	YBL045C	4	0	Structure	3cxh	L	99.8	94.3	27	457	-1	-1	-1	P07256-EXP-3cxh_L.pdb
P07256	QCR1_YEAST	YBL045C	5	0	Structure	1kb9	A	99.8	94.3	27	457	-1	-1	-1	P07256-EXP-1kb9_A.pdb
P07256	QCR1_YEAST	YBL045C	6	0	Structure	3cx5	L	99.8	94.3	27	457	-1	-1	-1	P07256-EXP-3cx5_L.pdb
P07256	QCR1_YEAST	YBL045C	7	0	Structure	3cx5	A	99.8	94.3	27	457	-1	-1	-1	P07256-EXP-3cx5_A.pdb
P07256	QCR1_YEAST	YBL045C	8	0	Structure	1kyo	L	99.5	94.3	27	457	-1	-1	-1	P07256-EXP-1kyo_L.pdb
P07256	QCR1_YEAST	YBL045C	9	0	Structure	1ezv	A	99.5	94.3	27	457	-1	-1	-1	P07256-EXP-1ezv_A.pdb
P07256	QCR1_YEAST	YBL045C	10	0	Structure	1kyo	A	99.5	94.3	27	457	-1	-1	-1	P07256-EXP-1kyo_A.pdb
P07213	TOM70_YEAST	YNL121C	1	0	Structure	2gw1	B	94.7	83.3	94	607	-1	-1	-1	P07213-EXP-2gw1_B.pdb
P07213	TOM70_YEAST	YNL121C	2	0	Structure	2gw1	A	94.7	83.3	94	607	-1	-1	-1	P07213-EXP-2gw1_A.pdb
P21306	ATP5E_YEAST	YPL271W	1	0	Structure	3zia	S	95.1	98.4	2	62	-1	-1	-1	P21306-EXP-3zia_S.pdb
P21306	ATP5E_YEAST	YPL271W	2	0	Structure	3zia	I	95.1	98.4	2	62	-1	-1	-1	P21306-EXP-3zia_I.pdb
P21306	ATP5E_YEAST	YPL271W	3	0	Structure	2wpd	I	100	95.2	2	60	-1	-1	-1	P21306-EXP-2wpd_I.pdb
P21306	ATP5E_YEAST	YPL271W	4	0	Structure	4b2q	i	100	95.2	2	60	-1	-1	-1	P21306-EXP-4b2q_i.pdb
P21306	ATP5E_YEAST	YPL271W	5	0	Structure	4b2q	I	100	95.2	2	60	-1	-1	-1	P21306-EXP-4b2q_I.pdb
P21306	ATP5E_YEAST	YPL271W	6	0	Structure	3ofn	R	94.8	93.5	5	62	-1	-1	-1	P21306-EXP-3ofn_R.pdb
P21306	ATP5E_YEAST	YPL271W	7	0	Structure	3ofn	I	94.8	93.5	5	62	-1	-1	-1	P21306-EXP-3ofn_I.pdb
P21306	ATP5E_YEAST	YPL271W	8	0	Structure	3oeh	I	90.7	87.1	9	62	-1	-1	-1	P21306-EXP-3oeh_I.pdb
P21306	ATP5E_YEAST	YPL271W	9	0	Structure	3oee	I	90.7	87.1	9	62	-1	-1	-1	P21306-EXP-3oee_I.pdb
P21306	ATP5E_YEAST	YPL271W	10	0	Structure	3oe7	I	88.9	87.1	9	62	-1	-1	-1	P21306-EXP-3oe7_I.pdb
P21306	ATP5E_YEAST	YPL271W	11	0	Structure	2hld	I	88.9	87.1	9	62	-1	-1	-1	P21306-EXP-2hld_I.pdb
P21306	ATP5E_YEAST	YPL271W	12	0	Structure	3fks	I	85.2	87.1	9	62	-1	-1	-1	P21306-EXP-3fks_I.pdb
P21306	ATP5E_YEAST	YPL271W	13	1	Structure	3oeh	R	89.5	61.3	11	48	-1	-1	-1	P21306-EXP-3oeh_R.pdb
P21306	ATP5E_YEAST	YPL271W	14	1	Structure	3oee	R	89.5	61.3	11	48	-1	-1	-1	P21306-EXP-3oee_R.pdb
P21306	ATP5E_YEAST	YPL271W	15	1	Structure	2hld	R	89.5	61.3	11	48	-1	-1	-1	P21306-EXP-2hld_R.pdb
P21306	ATP5E_YEAST	YPL271W	16	1	Structure	3oe7	R	81.6	61.3	11	48	-1	-1	-1	P21306-EXP-3oe7_R.pdb
P21306	ATP5E_YEAST	YPL271W	17	1	Structure	3oee	1	73	59.7	10	46	-1	-1	-1	P21306-EXP-3oee_1.pdb
P21306	ATP5E_YEAST	YPL271W	18	1	Structure	3oeh	1	73	59.7	10	46	-1	-1	-1	P21306-EXP-3oeh_1.pdb
P21306	ATP5E_YEAST	YPL271W	19	1	Structure	2hld	1	73	59.7	10	46	-1	-1	-1	P21306-EXP-2hld_1.pdb
P21306	ATP5E_YEAST	YPL271W	20	1	Structure	3fks	R	67.6	59.7	12	48	-1	-1	-1	P21306-EXP-3fks_R.pdb
P21306	ATP5E_YEAST	YPL271W	21	1	Structure	3oe7	1	67.6	59.7	10	46	-1	-1	-1	P21306-EXP-3oe7_1.pdb
P21306	ATP5E_YEAST	YPL271W	22	1	Structure	3fks	1	69.4	58.1	9	44	-1	-1	-1	P21306-EXP-3fks_1.pdb
P38077	ATPG_YEAST	YBR039W	1	0	Structure	2wpd	G	96.8	89.4	34	311	-1	-1	-1	P38077-EXP-2wpd_G.pdb
P38077	ATPG_YEAST	YBR039W	2	0	Structure	4b2q	G	96.8	89.4	34	311	-1	-1	-1	P38077-EXP-4b2q_G.pdb
P38077	ATPG_YEAST	YBR039W	3	0	Structure	4b2q	g	96.8	89.4	34	311	-1	-1	-1	P38077-EXP-4b2q_g.pdb
P38077	ATPG_YEAST	YBR039W	4	0	Structure	2xok	G	96	89.1	34	310	-1	-1	-1	P38077-EXP-2xok_G.pdb
P38077	ATPG_YEAST	YBR039W	5	0	Structure	3zry	G	96	89.1	34	310	-1	-1	-1	P38077-EXP-3zry_G.pdb
P38077	ATPG_YEAST	YBR039W	6	0	Structure	3ofn	G	97.1	88.7	34	309	-1	-1	-1	P38077-EXP-3ofn_G.pdb
P38077	ATPG_YEAST	YBR039W	7	0	Structure	3fks	G	97.1	88.7	34	309	-1	-1	-1	P38077-EXP-3fks_G.pdb
P38077	ATPG_YEAST	YBR039W	8	0	Structure	3ofn	P	97.1	88.7	34	309	-1	-1	-1	P38077-EXP-3ofn_P.pdb
P38077	ATPG_YEAST	YBR039W	9	0	Structure	3oeh	G	96.4	88.7	34	309	-1	-1	-1	P38077-EXP-3oeh_G.pdb
P38077	ATPG_YEAST	YBR039W	10	0	Structure	3oee	G	96.4	88.7	34	309	-1	-1	-1	P38077-EXP-3oee_G.pdb
P38077	ATPG_YEAST	YBR039W	11	0	Structure	3zia	Q	96	88.7	34	309	-1	-1	-1	P38077-EXP-3zia_Q.pdb
P38077	ATPG_YEAST	YBR039W	12	0	Structure	2hld	G	96	88.7	34	309	-1	-1	-1	P38077-EXP-2hld_G.pdb
P38077	ATPG_YEAST	YBR039W	13	0	Structure	3zia	G	96	88.7	34	309	-1	-1	-1	P38077-EXP-3zia_G.pdb
P38077	ATPG_YEAST	YBR039W	14	0	Structure	3oe7	G	95.7	88.7	34	309	-1	-1	-1	P38077-EXP-3oe7_G.pdb
P38077	ATPG_YEAST	YBR039W	15	0	Structure	3oeh	P	89.1	88.7	34	309	-1	-1	-1	P38077-EXP-3oeh_P.pdb
P38077	ATPG_YEAST	YBR039W	16	0	Structure	3oee	P	88.4	88.7	34	309	-1	-1	-1	P38077-EXP-3oee_P.pdb
P38077	ATPG_YEAST	YBR039W	17	0	Structure	3oe7	P	88	88.7	34	309	-1	-1	-1	P38077-EXP-3oe7_P.pdb
P38077	ATPG_YEAST	YBR039W	18	0	Structure	2hld	P	88	88.7	34	309	-1	-1	-1	P38077-EXP-2hld_P.pdb
P38077	ATPG_YEAST	YBR039W	19	0	Structure	3fks	P	85.1	88.7	34	309	-1	-1	-1	P38077-EXP-3fks_P.pdb
P38077	ATPG_YEAST	YBR039W	20	0	Structure	3fks	Y	67.8	88.7	34	309	-1	-1	-1	P38077-EXP-3fks_Y.pdb
P38077	ATPG_YEAST	YBR039W	21	0	Structure	3oeh	Y	73.1	88.4	34	308	-1	-1	-1	P38077-EXP-3oeh_Y.pdb
P38077	ATPG_YEAST	YBR039W	22	0	Structure	2hld	Y	72.7	88.4	34	308	-1	-1	-1	P38077-EXP-2hld_Y.pdb
P38077	ATPG_YEAST	YBR039W	23	0	Structure	3oee	Y	72.7	88.4	34	308	-1	-1	-1	P38077-EXP-3oee_Y.pdb
P38077	ATPG_YEAST	YBR039W	24	0	Structure	3oe7	Y	71.6	88.4	34	308	-1	-1	-1	P38077-EXP-3oe7_Y.pdb
P38077	ATPG_YEAST	YBR039W	25	0	Model	1h8e	G	43	89.1	34	310	1	1.33	-0.46	P38077-MDL-P38077.1-1h8e_G.pdb
P38077	ATPG_YEAST	YBR039W	26	0	Model	1h8e	G	43	89.1	34	310	1	0	0	P38077-MDL-P38077.2-1h8e_G.pdb
P38077	ATPG_YEAST	YBR039W	27	0	Model	1h8e	G	43	89.1	34	310	1	0	0	P38077-MDL-P38077.4-1h8e_G.pdb
P38077	ATPG_YEAST	YBR039W	28	0	Model	1e79	G	42	89.1	34	310	1	1.375	-0.27	P38077-MDL-P38077.5-1e79_G.pdb
P38077	ATPG_YEAST	YBR039W	29	1	Structure	3ofn	Y	84	26	229	309	-1	-1	-1	P38077-EXP-3ofn_Y.pdb
P07251	ATPA_YEAST	YBL099W	1	0	Structure	3oeh	K	99.4	89.7	56	544	-1	-1	-1	P07251-EXP-3oeh_K.pdb
P07251	ATPA_YEAST	YBL099W	2	0	Structure	2hld	K	99.4	89.7	56	544	-1	-1	-1	P07251-EXP-2hld_K.pdb
P07251	ATPA_YEAST	YBL099W	3	0	Structure	3oe7	K	99.4	89.7	56	544	-1	-1	-1	P07251-EXP-3oe7_K.pdb
P07251	ATPA_YEAST	YBL099W	4	0	Structure	3oee	K	99.2	89.7	56	544	-1	-1	-1	P07251-EXP-3oee_K.pdb
P07251	ATPA_YEAST	YBL099W	5	0	Structure	3fks	K	99.2	89.5	53	540	-1	-1	-1	P07251-EXP-3fks_K.pdb
P07251	ATPA_YEAST	YBL099W	6	0	Structure	3ofn	K	99	89.4	56	542	-1	-1	-1	P07251-EXP-3ofn_K.pdb
P07251	ATPA_YEAST	YBL099W	7	0	Structure	3ofn	B	99.8	89.2	60	545	-1	-1	-1	P07251-EXP-3ofn_B.pdb
P07251	ATPA_YEAST	YBL099W	8	0	Structure	3zry	B	99.6	89.2	60	545	-1	-1	-1	P07251-EXP-3zry_B.pdb
P07251	ATPA_YEAST	YBL099W	9	0	Structure	2xok	B	99.6	89.2	60	545	-1	-1	-1	P07251-EXP-2xok_B.pdb
P07251	ATPA_YEAST	YBL099W	10	0	Structure	3fks	A	99.6	89.2	59	544	-1	-1	-1	P07251-EXP-3fks_A.pdb
P07251	ATPA_YEAST	YBL099W	11	0	Structure	3ofn	T	99.4	89.2	60	545	-1	-1	-1	P07251-EXP-3ofn_T.pdb
P07251	ATPA_YEAST	YBL099W	12	0	Structure	4b2q	a	100	89	61	545	-1	-1	-1	P07251-EXP-4b2q_a.pdb
P07251	ATPA_YEAST	YBL099W	13	0	Structure	4b2q	b	100	89	60	544	-1	-1	-1	P07251-EXP-4b2q_b.pdb
P07251	ATPA_YEAST	YBL099W	14	0	Structure	2xok	C	100	89	61	545	-1	-1	-1	P07251-EXP-2xok_C.pdb
P07251	ATPA_YEAST	YBL099W	15	0	Structure	2wpd	A	100	89	61	545	-1	-1	-1	P07251-EXP-2wpd_A.pdb
P07251	ATPA_YEAST	YBL099W	16	0	Structure	2wpd	C	100	89	61	545	-1	-1	-1	P07251-EXP-2wpd_C.pdb
P07251	ATPA_YEAST	YBL099W	17	0	Structure	3zry	C	100	89	61	545	-1	-1	-1	P07251-EXP-3zry_C.pdb
P07251	ATPA_YEAST	YBL099W	18	0	Structure	4b2q	B	100	89	60	544	-1	-1	-1	P07251-EXP-4b2q_B.pdb
P07251	ATPA_YEAST	YBL099W	19	0	Structure	4b2q	C	100	89	61	545	-1	-1	-1	P07251-EXP-4b2q_C.pdb
P07251	ATPA_YEAST	YBL099W	20	0	Structure	4b2q	A	100	89	61	545	-1	-1	-1	P07251-EXP-4b2q_A.pdb
P07251	ATPA_YEAST	YBL099W	21	0	Structure	2wpd	B	100	89	60	544	-1	-1	-1	P07251-EXP-2wpd_B.pdb
P07251	ATPA_YEAST	YBL099W	22	0	Structure	4b2q	c	100	89	61	545	-1	-1	-1	P07251-EXP-4b2q_c.pdb
P07251	ATPA_YEAST	YBL099W	23	0	Structure	3ofn	U	99.8	89	61	545	-1	-1	-1	P07251-EXP-3ofn_U.pdb
P07251	ATPA_YEAST	YBL099W	24	0	Structure	3ofn	A	99.8	89	61	545	-1	-1	-1	P07251-EXP-3ofn_A.pdb
P07251	ATPA_YEAST	YBL099W	25	0	Structure	3oe7	B	99.6	89	60	544	-1	-1	-1	P07251-EXP-3oe7_B.pdb
P07251	ATPA_YEAST	YBL099W	26	0	Structure	2xok	A	99.6	89	61	545	-1	-1	-1	P07251-EXP-2xok_A.pdb
P07251	ATPA_YEAST	YBL099W	27	0	Structure	2hld	B	99.6	89	60	544	-1	-1	-1	P07251-EXP-2hld_B.pdb
P07251	ATPA_YEAST	YBL099W	28	0	Structure	3oeh	B	99.6	89	60	544	-1	-1	-1	P07251-EXP-3oeh_B.pdb
P07251	ATPA_YEAST	YBL099W	29	0	Structure	3zry	A	99.6	89	61	545	-1	-1	-1	P07251-EXP-3zry_A.pdb
P07251	ATPA_YEAST	YBL099W	30	0	Structure	3ofn	S	99.4	89	61	545	-1	-1	-1	P07251-EXP-3ofn_S.pdb
P07251	ATPA_YEAST	YBL099W	31	0	Structure	3oee	B	99.4	89	60	544	-1	-1	-1	P07251-EXP-3oee_B.pdb
P07251	ATPA_YEAST	YBL099W	32	0	Structure	3zia	L	99	89	60	544	-1	-1	-1	P07251-EXP-3zia_L.pdb
P07251	ATPA_YEAST	YBL099W	33	0	Structure	3zia	B	99	89	60	544	-1	-1	-1	P07251-EXP-3zia_B.pdb
P07251	ATPA_YEAST	YBL099W	34	0	Structure	3fks	T	97.5	89	60	544	-1	-1	-1	P07251-EXP-3fks_T.pdb
P07251	ATPA_YEAST	YBL099W	35	0	Structure	3zia	C	100	88.8	61	544	-1	-1	-1	P07251-EXP-3zia_C.pdb
P07251	ATPA_YEAST	YBL099W	36	0	Structure	3zia	A	100	88.8	61	544	-1	-1	-1	P07251-EXP-3zia_A.pdb
P07251	ATPA_YEAST	YBL099W	37	0	Structure	3fks	L	100	88.8	61	544	-1	-1	-1	P07251-EXP-3fks_L.pdb
P07251	ATPA_YEAST	YBL099W	38	0	Structure	3zia	K	100	88.8	61	544	-1	-1	-1	P07251-EXP-3zia_K.pdb
P07251	ATPA_YEAST	YBL099W	39	0	Structure	3oe7	C	100	88.8	61	544	-1	-1	-1	P07251-EXP-3oe7_C.pdb
P07251	ATPA_YEAST	YBL099W	40	0	Structure	2hld	C	100	88.8	61	544	-1	-1	-1	P07251-EXP-2hld_C.pdb
P07251	ATPA_YEAST	YBL099W	41	0	Structure	3fks	C	100	88.8	61	544	-1	-1	-1	P07251-EXP-3fks_C.pdb
P07251	ATPA_YEAST	YBL099W	42	0	Structure	3zia	M	100	88.8	61	544	-1	-1	-1	P07251-EXP-3zia_M.pdb
P07251	ATPA_YEAST	YBL099W	43	0	Structure	3oeh	C	100	88.8	61	544	-1	-1	-1	P07251-EXP-3oeh_C.pdb
P07251	ATPA_YEAST	YBL099W	44	0	Structure	3ofn	C	99.8	88.8	61	544	-1	-1	-1	P07251-EXP-3ofn_C.pdb
P07251	ATPA_YEAST	YBL099W	45	0	Structure	3oee	C	99.8	88.8	61	544	-1	-1	-1	P07251-EXP-3oee_C.pdb
P07251	ATPA_YEAST	YBL099W	46	0	Structure	2hld	L	99.6	88.8	61	544	-1	-1	-1	P07251-EXP-2hld_L.pdb
P07251	ATPA_YEAST	YBL099W	47	0	Structure	3oe7	L	99.6	88.8	61	544	-1	-1	-1	P07251-EXP-3oe7_L.pdb
P07251	ATPA_YEAST	YBL099W	48	0	Structure	3oeh	A	99.6	88.8	61	544	-1	-1	-1	P07251-EXP-3oeh_A.pdb
P07251	ATPA_YEAST	YBL099W	49	0	Structure	3oe7	A	99.6	88.8	61	544	-1	-1	-1	P07251-EXP-3oe7_A.pdb
P07251	ATPA_YEAST	YBL099W	50	0	Structure	2hld	A	99.6	88.8	61	544	-1	-1	-1	P07251-EXP-2hld_A.pdb
P07251	ATPA_YEAST	YBL099W	51	0	Structure	3oeh	L	99.6	88.8	61	544	-1	-1	-1	P07251-EXP-3oeh_L.pdb
P07251	ATPA_YEAST	YBL099W	52	0	Structure	2hld	T	99.4	88.8	61	544	-1	-1	-1	P07251-EXP-2hld_T.pdb
P07251	ATPA_YEAST	YBL099W	53	0	Structure	3oe7	T	99.4	88.8	61	544	-1	-1	-1	P07251-EXP-3oe7_T.pdb
P07251	ATPA_YEAST	YBL099W	54	0	Structure	3oe7	J	99.4	88.8	61	544	-1	-1	-1	P07251-EXP-3oe7_J.pdb
P07251	ATPA_YEAST	YBL099W	55	0	Structure	3oee	L	99.4	88.8	61	544	-1	-1	-1	P07251-EXP-3oee_L.pdb
P07251	ATPA_YEAST	YBL099W	56	0	Structure	2hld	U	99.4	88.8	61	544	-1	-1	-1	P07251-EXP-2hld_U.pdb
P07251	ATPA_YEAST	YBL099W	57	0	Structure	3oeh	U	99.4	88.8	61	544	-1	-1	-1	P07251-EXP-3oeh_U.pdb
P07251	ATPA_YEAST	YBL099W	58	0	Structure	3oe7	U	99.4	88.8	61	544	-1	-1	-1	P07251-EXP-3oe7_U.pdb
P07251	ATPA_YEAST	YBL099W	59	0	Structure	3oeh	J	99.4	88.8	61	544	-1	-1	-1	P07251-EXP-3oeh_J.pdb
P07251	ATPA_YEAST	YBL099W	60	0	Structure	3ofn	J	99.4	88.8	61	544	-1	-1	-1	P07251-EXP-3ofn_J.pdb
P07251	ATPA_YEAST	YBL099W	61	0	Structure	3fks	J	99.4	88.8	61	544	-1	-1	-1	P07251-EXP-3fks_J.pdb
P07251	ATPA_YEAST	YBL099W	62	0	Structure	2hld	J	99.4	88.8	61	544	-1	-1	-1	P07251-EXP-2hld_J.pdb
P07251	ATPA_YEAST	YBL099W	63	0	Structure	3oee	A	99.4	88.8	61	544	-1	-1	-1	P07251-EXP-3oee_A.pdb
P07251	ATPA_YEAST	YBL099W	64	0	Structure	3oee	U	99.2	88.8	61	544	-1	-1	-1	P07251-EXP-3oee_U.pdb
P07251	ATPA_YEAST	YBL099W	65	0	Structure	3oee	J	99.2	88.8	61	544	-1	-1	-1	P07251-EXP-3oee_J.pdb
P07251	ATPA_YEAST	YBL099W	66	0	Structure	3oeh	T	99	88.8	61	544	-1	-1	-1	P07251-EXP-3oeh_T.pdb
P07251	ATPA_YEAST	YBL099W	67	0	Structure	3ofn	L	98.8	88.8	61	544	-1	-1	-1	P07251-EXP-3ofn_L.pdb
P07251	ATPA_YEAST	YBL099W	68	0	Structure	3fks	U	98.6	88.8	61	544	-1	-1	-1	P07251-EXP-3fks_U.pdb
P07251	ATPA_YEAST	YBL099W	69	0	Structure	3oee	T	98.6	88.8	61	544	-1	-1	-1	P07251-EXP-3oee_T.pdb
P07251	ATPA_YEAST	YBL099W	70	0	Structure	3fks	S	99.6	88.6	62	544	-1	-1	-1	P07251-EXP-3fks_S.pdb
P07251	ATPA_YEAST	YBL099W	71	0	Structure	3oe7	S	99.4	88.6	62	544	-1	-1	-1	P07251-EXP-3oe7_S.pdb
P07251	ATPA_YEAST	YBL099W	72	0	Structure	2hld	S	99.4	88.6	62	544	-1	-1	-1	P07251-EXP-2hld_S.pdb
P07251	ATPA_YEAST	YBL099W	73	0	Structure	3oeh	S	99	88.6	62	544	-1	-1	-1	P07251-EXP-3oeh_S.pdb
P07251	ATPA_YEAST	YBL099W	74	0	Structure	3oee	S	98.6	88.6	62	544	-1	-1	-1	P07251-EXP-3oee_S.pdb
P07251	ATPA_YEAST	YBL099W	75	0	Structure	3fks	B	99.4	88.4	60	541	-1	-1	-1	P07251-EXP-3fks_B.pdb
P07251	ATPA_YEAST	YBL099W	76	0	Model	1qo1	A	75	89	61	545	1	0	0	P07251-MDL-P07251.15-1qo1_A.pdb
P07251	ATPA_YEAST	YBL099W	77	0	Model	1h8e	A	73	89.5	58	545	1	0	0	P07251-MDL-P07251.14-1h8e_A.pdb
P07251	ATPA_YEAST	YBL099W	78	0	Model	1fx0	A	61	88.4	64	545	1	0	0	P07251-MDL-P07251.13-1fx0_A.pdb
P00830	ATPB_YEAST	YJR121W	1	0	Structure	2wpd	E	100	92.6	39	511	-1	-1	-1	P00830-EXP-2wpd_E.pdb
P00830	ATPB_YEAST	YJR121W	2	0	Structure	4b2q	E	100	92.6	39	511	-1	-1	-1	P00830-EXP-4b2q_E.pdb
P00830	ATPB_YEAST	YJR121W	3	0	Structure	4b2q	e	100	92.6	39	511	-1	-1	-1	P00830-EXP-4b2q_e.pdb
P00830	ATPB_YEAST	YJR121W	4	0	Structure	4b2q	F	100	92.4	40	511	-1	-1	-1	P00830-EXP-4b2q_F.pdb
P00830	ATPB_YEAST	YJR121W	5	0	Structure	2wpd	F	100	92.4	40	511	-1	-1	-1	P00830-EXP-2wpd_F.pdb
P00830	ATPB_YEAST	YJR121W	6	0	Structure	4b2q	f	100	92.4	40	511	-1	-1	-1	P00830-EXP-4b2q_f.pdb
P00830	ATPB_YEAST	YJR121W	7	0	Structure	2xok	D	100	92.2	39	509	-1	-1	-1	P00830-EXP-2xok_D.pdb
P00830	ATPB_YEAST	YJR121W	8	0	Structure	3fks	F	100	92.2	38	508	-1	-1	-1	P00830-EXP-3fks_F.pdb
P00830	ATPB_YEAST	YJR121W	9	0	Structure	3zry	D	100	92.2	39	509	-1	-1	-1	P00830-EXP-3zry_D.pdb
P00830	ATPB_YEAST	YJR121W	10	0	Structure	2hld	D	100	92	39	508	-1	-1	-1	P00830-EXP-2hld_D.pdb
P00830	ATPB_YEAST	YJR121W	11	0	Structure	3zry	F	100	92	40	509	-1	-1	-1	P00830-EXP-3zry_F.pdb
P00830	ATPB_YEAST	YJR121W	12	0	Structure	2hld	M	100	92	39	508	-1	-1	-1	P00830-EXP-2hld_M.pdb
P00830	ATPB_YEAST	YJR121W	13	0	Structure	2hld	V	100	92	39	508	-1	-1	-1	P00830-EXP-2hld_V.pdb
P00830	ATPB_YEAST	YJR121W	14	0	Structure	4b2q	D	100	92	39	508	-1	-1	-1	P00830-EXP-4b2q_D.pdb
P00830	ATPB_YEAST	YJR121W	15	0	Structure	3oee	N	100	92	39	508	-1	-1	-1	P00830-EXP-3oee_N.pdb
P00830	ATPB_YEAST	YJR121W	16	0	Structure	3oe7	M	100	92	39	508	-1	-1	-1	P00830-EXP-3oe7_M.pdb
P00830	ATPB_YEAST	YJR121W	17	0	Structure	3ofn	D	100	92	39	508	-1	-1	-1	P00830-EXP-3ofn_D.pdb
P00830	ATPB_YEAST	YJR121W	18	0	Structure	3oe7	D	100	92	39	508	-1	-1	-1	P00830-EXP-3oe7_D.pdb
P00830	ATPB_YEAST	YJR121W	19	0	Structure	3oee	M	100	92	39	508	-1	-1	-1	P00830-EXP-3oee_M.pdb
P00830	ATPB_YEAST	YJR121W	20	0	Structure	4b2q	d	100	92	39	508	-1	-1	-1	P00830-EXP-4b2q_d.pdb
P00830	ATPB_YEAST	YJR121W	21	0	Structure	2hld	N	100	92	39	508	-1	-1	-1	P00830-EXP-2hld_N.pdb
P00830	ATPB_YEAST	YJR121W	22	0	Structure	2xok	F	100	92	40	509	-1	-1	-1	P00830-EXP-2xok_F.pdb
P00830	ATPB_YEAST	YJR121W	23	0	Structure	3oe7	N	100	92	39	508	-1	-1	-1	P00830-EXP-3oe7_N.pdb
P00830	ATPB_YEAST	YJR121W	24	0	Structure	3oe7	V	100	92	39	508	-1	-1	-1	P00830-EXP-3oe7_V.pdb
P00830	ATPB_YEAST	YJR121W	25	0	Structure	3zia	D	100	92	39	508	-1	-1	-1	P00830-EXP-3zia_D.pdb
P00830	ATPB_YEAST	YJR121W	26	0	Structure	2wpd	D	100	92	39	508	-1	-1	-1	P00830-EXP-2wpd_D.pdb
P00830	ATPB_YEAST	YJR121W	27	0	Structure	3oee	V	100	92	39	508	-1	-1	-1	P00830-EXP-3oee_V.pdb
P00830	ATPB_YEAST	YJR121W	28	0	Structure	3oee	D	100	92	39	508	-1	-1	-1	P00830-EXP-3oee_D.pdb
P00830	ATPB_YEAST	YJR121W	29	0	Structure	3zia	N	100	92	39	508	-1	-1	-1	P00830-EXP-3zia_N.pdb
P00830	ATPB_YEAST	YJR121W	30	0	Structure	3oeh	N	99.8	92	39	508	-1	-1	-1	P00830-EXP-3oeh_N.pdb
P00830	ATPB_YEAST	YJR121W	31	0	Structure	3oeh	D	99.8	92	39	508	-1	-1	-1	P00830-EXP-3oeh_D.pdb
P00830	ATPB_YEAST	YJR121W	32	0	Structure	3oeh	V	99.8	92	39	508	-1	-1	-1	P00830-EXP-3oeh_V.pdb
P00830	ATPB_YEAST	YJR121W	33	0	Structure	3oeh	M	99.8	92	39	508	-1	-1	-1	P00830-EXP-3oeh_M.pdb
P00830	ATPB_YEAST	YJR121W	34	0	Structure	3zia	P	100	91.8	40	508	-1	-1	-1	P00830-EXP-3zia_P.pdb
P00830	ATPB_YEAST	YJR121W	35	0	Structure	3oe7	X	100	91.8	40	508	-1	-1	-1	P00830-EXP-3oe7_X.pdb
P00830	ATPB_YEAST	YJR121W	36	0	Structure	3oe7	F	100	91.8	40	508	-1	-1	-1	P00830-EXP-3oe7_F.pdb
P00830	ATPB_YEAST	YJR121W	37	0	Structure	3ofn	X	100	91.8	40	508	-1	-1	-1	P00830-EXP-3ofn_X.pdb
P00830	ATPB_YEAST	YJR121W	38	0	Structure	2xok	E	100	91.8	41	509	-1	-1	-1	P00830-EXP-2xok_E.pdb
P00830	ATPB_YEAST	YJR121W	39	0	Structure	3fks	X	100	91.8	40	508	-1	-1	-1	P00830-EXP-3fks_X.pdb
P00830	ATPB_YEAST	YJR121W	40	0	Structure	2hld	F	100	91.8	40	508	-1	-1	-1	P00830-EXP-2hld_F.pdb
P00830	ATPB_YEAST	YJR121W	41	0	Structure	3ofn	F	100	91.8	40	508	-1	-1	-1	P00830-EXP-3ofn_F.pdb
P00830	ATPB_YEAST	YJR121W	42	0	Structure	3oee	F	100	91.8	40	508	-1	-1	-1	P00830-EXP-3oee_F.pdb
P00830	ATPB_YEAST	YJR121W	43	0	Structure	3zia	F	100	91.8	40	508	-1	-1	-1	P00830-EXP-3zia_F.pdb
P00830	ATPB_YEAST	YJR121W	44	0	Structure	3zry	E	100	91.8	41	509	-1	-1	-1	P00830-EXP-3zry_E.pdb
P00830	ATPB_YEAST	YJR121W	45	0	Structure	3fks	O	100	91.8	40	508	-1	-1	-1	P00830-EXP-3fks_O.pdb
P00830	ATPB_YEAST	YJR121W	46	0	Structure	2hld	X	100	91.8	40	508	-1	-1	-1	P00830-EXP-2hld_X.pdb
P00830	ATPB_YEAST	YJR121W	47	0	Structure	3oee	X	100	91.8	40	508	-1	-1	-1	P00830-EXP-3oee_X.pdb
P00830	ATPB_YEAST	YJR121W	48	0	Structure	3ofn	E	100	91.8	40	508	-1	-1	-1	P00830-EXP-3ofn_E.pdb
P00830	ATPB_YEAST	YJR121W	49	0	Structure	3fks	M	100	91.8	40	508	-1	-1	-1	P00830-EXP-3fks_M.pdb
P00830	ATPB_YEAST	YJR121W	50	0	Structure	3ofn	O	100	91.8	40	508	-1	-1	-1	P00830-EXP-3ofn_O.pdb
P00830	ATPB_YEAST	YJR121W	51	0	Structure	3oeh	X	99.8	91.8	40	508	-1	-1	-1	P00830-EXP-3oeh_X.pdb
P00830	ATPB_YEAST	YJR121W	52	0	Structure	3oeh	F	99.8	91.8	40	508	-1	-1	-1	P00830-EXP-3oeh_F.pdb
P00830	ATPB_YEAST	YJR121W	53	0	Structure	3fks	D	99.4	91.8	39	507	-1	-1	-1	P00830-EXP-3fks_D.pdb
P00830	ATPB_YEAST	YJR121W	54	0	Structure	2hld	E	100	91.6	41	508	-1	-1	-1	P00830-EXP-2hld_E.pdb
P00830	ATPB_YEAST	YJR121W	55	0	Structure	3ofn	W	100	91.6	41	508	-1	-1	-1	P00830-EXP-3ofn_W.pdb
P00830	ATPB_YEAST	YJR121W	56	0	Structure	3fks	E	100	91.6	41	508	-1	-1	-1	P00830-EXP-3fks_E.pdb
P00830	ATPB_YEAST	YJR121W	57	0	Structure	3zia	O	100	91.6	41	508	-1	-1	-1	P00830-EXP-3zia_O.pdb
P00830	ATPB_YEAST	YJR121W	58	0	Structure	3zia	E	100	91.6	41	508	-1	-1	-1	P00830-EXP-3zia_E.pdb
P00830	ATPB_YEAST	YJR121W	59	0	Structure	3oe7	E	100	91.6	41	508	-1	-1	-1	P00830-EXP-3oe7_E.pdb
P00830	ATPB_YEAST	YJR121W	60	0	Structure	3oee	O	100	91.6	40	507	-1	-1	-1	P00830-EXP-3oee_O.pdb
P00830	ATPB_YEAST	YJR121W	61	0	Structure	3oe7	O	100	91.6	40	507	-1	-1	-1	P00830-EXP-3oe7_O.pdb
P00830	ATPB_YEAST	YJR121W	62	0	Structure	2hld	O	100	91.6	40	507	-1	-1	-1	P00830-EXP-2hld_O.pdb
P00830	ATPB_YEAST	YJR121W	63	0	Structure	3oee	E	100	91.6	41	508	-1	-1	-1	P00830-EXP-3oee_E.pdb
P00830	ATPB_YEAST	YJR121W	64	0	Structure	3oeh	E	99.8	91.6	41	508	-1	-1	-1	P00830-EXP-3oeh_E.pdb
P00830	ATPB_YEAST	YJR121W	65	0	Structure	3oeh	O	99.8	91.6	40	507	-1	-1	-1	P00830-EXP-3oeh_O.pdb
P00830	ATPB_YEAST	YJR121W	66	0	Structure	3ofn	N	98.9	91.6	41	508	-1	-1	-1	P00830-EXP-3ofn_N.pdb
P00830	ATPB_YEAST	YJR121W	67	0	Structure	3fks	V	97.2	91.6	40	507	-1	-1	-1	P00830-EXP-3fks_V.pdb
P00830	ATPB_YEAST	YJR121W	68	0	Structure	3oe7	W	100	91.4	41	507	-1	-1	-1	P00830-EXP-3oe7_W.pdb
P00830	ATPB_YEAST	YJR121W	69	0	Structure	2hld	W	100	91.4	41	507	-1	-1	-1	P00830-EXP-2hld_W.pdb
P00830	ATPB_YEAST	YJR121W	70	0	Structure	3oee	W	100	91.4	41	507	-1	-1	-1	P00830-EXP-3oee_W.pdb
P00830	ATPB_YEAST	YJR121W	71	0	Structure	3fks	N	99.8	91.4	41	507	-1	-1	-1	P00830-EXP-3fks_N.pdb
P00830	ATPB_YEAST	YJR121W	72	0	Structure	3oeh	W	99.8	91.4	41	507	-1	-1	-1	P00830-EXP-3oeh_W.pdb
P00830	ATPB_YEAST	YJR121W	73	0	Structure	3fks	W	100	91.2	41	506	-1	-1	-1	P00830-EXP-3fks_W.pdb
P00830	ATPB_YEAST	YJR121W	74	0	Structure	3ofn	M	100	90	40	499	-1	-1	-1	P00830-EXP-3ofn_M.pdb
P00830	ATPB_YEAST	YJR121W	75	0	Model	2ck3	D	80	91.2	43	508	1	1.97	-1.69	P00830-MDL-P00830.1-2ck3_D.pdb
P00830	ATPB_YEAST	YJR121W	76	0	Model	2ck3	D	79	91.4	42	508	1	1.97	-1.71	P00830-MDL-P00830.4-2ck3_D.pdb
P00830	ATPB_YEAST	YJR121W	77	0	Model	1fx0	B	68	89.4	42	498	1	0	0	P00830-MDL-P00830.2-1fx0_B.pdb
P00830	ATPB_YEAST	YJR121W	78	1	Structure	3ofn	V	96	73.4	40	414	-1	-1	-1	P00830-EXP-3ofn_V.pdb
Q07914	TIM14_YEAST	YLR008C	1	1	Structure	2guz	K	100	41.7	99	168	-1	-1	-1	Q07914-EXP-2guz_K.pdb
Q07914	TIM14_YEAST	YLR008C	2	1	Structure	2guz	I	100	41.7	99	168	-1	-1	-1	Q07914-EXP-2guz_I.pdb
Q07914	TIM14_YEAST	YLR008C	3	1	Structure	2guz	C	100	41.7	99	168	-1	-1	-1	Q07914-EXP-2guz_C.pdb
Q07914	TIM14_YEAST	YLR008C	4	1	Structure	2guz	E	100	41.7	99	168	-1	-1	-1	Q07914-EXP-2guz_E.pdb
Q07914	TIM14_YEAST	YLR008C	5	1	Structure	2guz	G	100	41.7	99	168	-1	-1	-1	Q07914-EXP-2guz_G.pdb
Q07914	TIM14_YEAST	YLR008C	6	1	Structure	2guz	O	100	41.7	99	168	-1	-1	-1	Q07914-EXP-2guz_O.pdb
Q07914	TIM14_YEAST	YLR008C	7	1	Structure	2guz	M	100	41.7	99	168	-1	-1	-1	Q07914-EXP-2guz_M.pdb
Q07914	TIM14_YEAST	YLR008C	8	1	Structure	2guz	A	100	41.7	99	168	-1	-1	-1	Q07914-EXP-2guz_A.pdb
P42949	TIM16_YEAST	YJL104W	1	1	Structure	2guz	H	98.5	43.6	53	117	-1	-1	-1	P42949-EXP-2guz_H.pdb
P42949	TIM16_YEAST	YJL104W	2	1	Structure	2guz	N	98.5	43.6	53	117	-1	-1	-1	P42949-EXP-2guz_N.pdb
P42949	TIM16_YEAST	YJL104W	3	1	Structure	2guz	J	98.5	43.6	53	117	-1	-1	-1	P42949-EXP-2guz_J.pdb
P42949	TIM16_YEAST	YJL104W	4	1	Structure	2guz	B	98.5	43.6	53	117	-1	-1	-1	P42949-EXP-2guz_B.pdb
P42949	TIM16_YEAST	YJL104W	5	1	Structure	2guz	D	98.5	43.6	53	117	-1	-1	-1	P42949-EXP-2guz_D.pdb
P42949	TIM16_YEAST	YJL104W	6	1	Structure	2guz	F	98.5	43.6	53	117	-1	-1	-1	P42949-EXP-2guz_F.pdb
P42949	TIM16_YEAST	YJL104W	7	1	Structure	2guz	L	98.5	43.6	53	117	-1	-1	-1	P42949-EXP-2guz_L.pdb
P42949	TIM16_YEAST	YJL104W	8	1	Structure	2guz	P	98.5	43.6	53	117	-1	-1	-1	P42949-EXP-2guz_P.pdb
P00175	CYB2_YEAST	YML054C	1	0	Structure	1kbi	A	98.6	86.5	81	591	-1	-1	-1	P00175-EXP-1kbi_A.pdb
P00175	CYB2_YEAST	YML054C	2	0	Structure	1fcb	A	96.7	86.5	81	591	-1	-1	-1	P00175-EXP-1fcb_A.pdb
P00175	CYB2_YEAST	YML054C	3	0	Structure	2oz0	A	96.5	86.1	82	590	-1	-1	-1	P00175-EXP-2oz0_A.pdb
P00175	CYB2_YEAST	YML054C	4	0	Structure	1ltd	A	96	84.9	90	591	-1	-1	-1	P00175-EXP-1ltd_A.pdb
P00175	CYB2_YEAST	YML054C	5	0	Structure	1lco	A	95.4	84.9	90	591	-1	-1	-1	P00175-EXP-1lco_A.pdb
P00175	CYB2_YEAST	YML054C	6	0	Structure	1ldc	A	95	84.9	90	591	-1	-1	-1	P00175-EXP-1ldc_A.pdb
P00175	CYB2_YEAST	YML054C	7	1	Structure	3ks0	A	100	15.6	86	177	-1	-1	-1	P00175-EXP-3ks0_A.pdb
P00175	CYB2_YEAST	YML054C	7	2	Structure	1kbi	B	98.1	69.9	179	591	-1	-1	-1	P00175-EXP-1kbi_B.pdb
P00175	CYB2_YEAST	YML054C	8	1	Structure	3ks0	B	100	15.6	86	177	-1	-1	-1	P00175-EXP-3ks0_B.pdb
P00175	CYB2_YEAST	YML054C	8	2	Structure	1fcb	B	97.1	69.7	180	591	-1	-1	-1	P00175-EXP-1fcb_B.pdb
P00175	CYB2_YEAST	YML054C	9	1	Structure	2oz0	B	95.6	69.9	178	590	-1	-1	-1	P00175-EXP-2oz0_B.pdb
P00175	CYB2_YEAST	YML054C	10	1	Structure	1szf	A	95.4	69.7	180	591	-1	-1	-1	P00175-EXP-1szf_A.pdb
P00175	CYB2_YEAST	YML054C	11	1	Structure	1kbj	A	95.4	69.7	180	591	-1	-1	-1	P00175-EXP-1kbj_A.pdb
P00175	CYB2_YEAST	YML054C	12	1	Structure	1kbj	B	95.1	69.7	180	591	-1	-1	-1	P00175-EXP-1kbj_B.pdb
P00175	CYB2_YEAST	YML054C	13	1	Structure	1sze	A	94.9	69.7	180	591	-1	-1	-1	P00175-EXP-1sze_A.pdb
P00175	CYB2_YEAST	YML054C	14	1	Structure	1szg	A	94.7	69.7	180	591	-1	-1	-1	P00175-EXP-1szg_A.pdb
P00175	CYB2_YEAST	YML054C	15	1	Structure	1lco	B	95.1	69.4	182	591	-1	-1	-1	P00175-EXP-1lco_B.pdb
P00175	CYB2_YEAST	YML054C	16	1	Structure	1sze	B	94.2	69.7	180	591	-1	-1	-1	P00175-EXP-1sze_B.pdb
P00175	CYB2_YEAST	YML054C	17	1	Structure	1ltd	B	94.4	69.4	182	591	-1	-1	-1	P00175-EXP-1ltd_B.pdb
P00175	CYB2_YEAST	YML054C	18	1	Structure	1szf	B	93.9	69.7	180	591	-1	-1	-1	P00175-EXP-1szf_B.pdb
P00175	CYB2_YEAST	YML054C	19	1	Structure	1szg	B	93.9	69.4	182	591	-1	-1	-1	P00175-EXP-1szg_B.pdb
P00175	CYB2_YEAST	YML054C	20	1	Structure	1qcw	B	93.7	69.4	182	591	-1	-1	-1	P00175-EXP-1qcw_B.pdb
P00175	CYB2_YEAST	YML054C	21	1	Structure	1qcw	A	93.7	69.4	182	591	-1	-1	-1	P00175-EXP-1qcw_A.pdb
P00175	CYB2_YEAST	YML054C	22	1	Structure	1ldc	B	92.9	69.4	182	591	-1	-1	-1	P00175-EXP-1ldc_B.pdb
P00175	CYB2_YEAST	YML054C	23	1	Model	1gox		42	59.7	202	554	1	0	0	P00175-MDL-P00175.21-1gox_.pdb
Q01852	TIM44_YEAST	YIL022W	1	1	Structure	2fxt	A	100	44.5	234	425	-1	-1	-1	Q01852-EXP-2fxt_A.pdb
Q01852	TIM44_YEAST	YIL022W	2	1	Structure	3qk9	B	88.8	45.7	235	431	-1	-1	-1	Q01852-EXP-3qk9_B.pdb
Q01852	TIM44_YEAST	YIL022W	3	1	Structure	3qk9	A	88.8	45.5	236	431	-1	-1	-1	Q01852-EXP-3qk9_A.pdb
P38720	6PGD1_YEAST	YHR183W	1	0	Structure	2p4q	A	100	97.3	1	476	-1	-1	-1	P38720-EXP-2p4q_A.pdb
P38720	6PGD1_YEAST	YHR183W	2	0	Model	2pgd		67	97.8	3	480	1	0	0	P38720-MDL-P38720.4-2pgd_.pdb
P38720	6PGD1_YEAST	YHR183W	3	0	Model	2pgd		67	97.8	3	480	1	1.9	-1.79	P38720-MDL-P38720.30-2pgd_.pdb
P38720	6PGD1_YEAST	YHR183W	4	0	Model	1pgn	A	65	98	2	480	1	1.599	-0.77	P38720-MDL-P38720.10-1pgn_A.pdb
P38720	6PGD1_YEAST	YHR183W	5	0	Model	1pgj	A	34	97.3	2	477	1	0	0	P38720-MDL-P38720.20-1pgj_A.pdb
P14540	ALF_YEAST	YKL060C	1	0	Model	1dos	A	49	97.8	9	359	1	0	0	P14540-MDL-P14540.5-1dos_A.pdb
P14540	ALF_YEAST	YKL060C	2	0	Model	1dos	A	49	97.5	10	359	1	1.678	-1.19	P14540-MDL-P14540.2-1dos_A.pdb
P14540	ALF_YEAST	YKL060C	3	0	Model	1b57	A	49	97.5	10	359	1	1.642	-1.22	P14540-MDL-P14540.4-1b57_A.pdb
P14540	ALF_YEAST	YKL060C	4	0	Model	1dos	A	49	97.5	10	359	1	1.72	-1.63	P14540-MDL-P14540.7-1dos_A.pdb
P14540	ALF_YEAST	YKL060C	5	0	Model	1b57	A	48	99.7	2	359	1	1.484	-1.12	P14540-MDL-P14540.6-1b57_A.pdb
P14540	ALF_YEAST	YKL060C	6	1	Model	1dos	A	49	1	10	359	1	0	0	P14540-MDL-P14540.10-1dos_A.pdb
P40416	ATM1_YEAST	YMR301C	1	0	Model	2hyd	A	31	84.6	91	674	1	1.181	0.25	P40416-MDL-P40416.19-2hyd_A.pdb
P40416	ATM1_YEAST	YMR301C	2	0	Model	2hyd	A	30	84.6	91	674	1	1.19	0.16	P40416-MDL-P40416.1-2hyd_A.pdb
P40416	ATM1_YEAST	YMR301C	3	0	Model	2hyd	A	29	84.6	91	674	1	1.189	0.17	P40416-MDL-P40416.11-2hyd_A.pdb
P40416	ATM1_YEAST	YMR301C	4	0	Model	3g5u	A	25	86.2	80	674	1	1.11	0.62	P40416-MDL-P40416.20-3g5u_A.pdb
P00925	ENO2_YEAST	YHR174W	1	0	Model	2al1	A	95	99.8	2	437	1	2.195	-1.54	P00925-MDL-P00925.102-2al1_A.pdb
P00925	ENO2_YEAST	YHR174W	2	0	Model	1ebh	A	95	99.8	2	437	1	0	0	P00925-MDL-P00925.75-1ebh_A.pdb
P00925	ENO2_YEAST	YHR174W	3	0	Model	2al1	A	95	99.8	2	437	1	2.25	-2.11	P00925-MDL-P00925.81-2al1_A.pdb
P00925	ENO2_YEAST	YHR174W	4	0	Model	2al1	A	95	99.5	3	437	1	1.937	-1.58	P00925-MDL-P00925.5-2al1_A.pdb
P00925	ENO2_YEAST	YHR174W	5	0	Model	1te6	A	61	99.8	2	437	1	0	0	P00925-MDL-P00925.132-1te6_A.pdb
P00925	ENO2_YEAST	YHR174W	6	1	Model	1one	A	95	1	2	437	1	0	0	P00925-MDL-P00925.138-1one_A.pdb
P00359	G3P3_YEAST	YGR192C	1	0	Structure	3pym	A	100	100	1	332	-1	-1	-1	P00359-EXP-3pym_A.pdb
P00359	G3P3_YEAST	YGR192C	2	0	Structure	3pym	B	100	99.7	2	332	-1	-1	-1	P00359-EXP-3pym_B.pdb
P00359	G3P3_YEAST	YGR192C	3	0	Structure	4iq8	A	100	99.7	2	332	-1	-1	-1	P00359-EXP-4iq8_A.pdb
P00359	G3P3_YEAST	YGR192C	4	0	Model	2i5p	O	83	99.4	1	330	1	1.952	-0.98	P00359-MDL-P00359.3-2i5p_O.pdb
P00359	G3P3_YEAST	YGR192C	5	0	Model	1gad	O	69	99.4	2	331	1	1.94	-1.62	P00359-MDL-P00359.8-1gad_O.pdb
P00359	G3P3_YEAST	YGR192C	6	0	Model	1gad	O	68	99.4	2	331	1	0	0	P00359-MDL-P00359.5-1gad_O.pdb
P00359	G3P3_YEAST	YGR192C	7	0	Model	1j0x	O	66	99.1	2	330	1	0	0	P00359-MDL-P00359.2-1j0x_O.pdb
P00359	G3P3_YEAST	YGR192C	8	0	Model	2b4r	O	59	99.1	2	330	1	1.759	-1.15	P00359-MDL-P00359.7-2b4r_O.pdb
P00359	G3P3_YEAST	YGR192C	9	0	Model	3gnq	A	47	99.7	2	332	1	1.6	-0.75	P00359-MDL-P00359.1-3gnq_A.pdb
P00359	G3P3_YEAST	YGR192C	10	0	Model	1obf	O	45	99.7	2	332	1	0	0	P00359-MDL-P00359.6-1obf_O.pdb
P00359	G3P3_YEAST	YGR192C	11	1	Model	1hdg	O	52	1	3	331	1	0	0	P00359-MDL-P00359.9-1hdg_O.pdb
P00359	G3P3_YEAST	YGR192C	12	1	Model	1obf	O	45	1	2	332	1	0	0	P00359-MDL-P00359.10-1obf_O.pdb
P04806	HXKA_YEAST	YFR053C	1	0	Structure	3b8a	X	99.8	97.1	15	485	-1	-1	-1	P04806-EXP-3b8a_X.pdb
P04806	HXKA_YEAST	YFR053C	2	0	Structure	1hkg	A	31.8	84.7	63	473	-1	-1	-1	P04806-EXP-1hkg_A.pdb
P04806	HXKA_YEAST	YFR053C	3	0	Model	1ig8	A	77	96.5	18	485	1	2.04	-2.11	P04806-MDL-P04806.3-1ig8_A.pdb
P04806	HXKA_YEAST	YFR053C	4	0	Model	1ig8	A	77	96.5	18	485	1	0	0	P04806-MDL-P04806.2-1ig8_A.pdb
P04806	HXKA_YEAST	YFR053C	5	0	Model	1cza	N	35	96.9	5	474	1	0	0	P04806-MDL-P04806.9-1cza_N.pdb
P04806	HXKA_YEAST	YFR053C	6	0	Model	1bg3	A	34	97.3	1	472	1	1.416	-0.92	P04806-MDL-P04806.1-1bg3_A.pdb
P04806	HXKA_YEAST	YFR053C	7	0	Model	1bg3	A	34	97.1	2	472	1	0	0	P04806-MDL-P04806.7-1bg3_A.pdb
P04806	HXKA_YEAST	YFR053C	8	0	Model	1bg3	A	34	97.1	2	472	1	0	0	P04806-MDL-P04806.8-1bg3_A.pdb
P06169	PDC1_YEAST	YLR044C	1	0	Structure	2vk8	C	99.3	99.8	2	563	-1	-1	-1	P06169-EXP-2vk8_C.pdb
P06169	PDC1_YEAST	YLR044C	2	0	Structure	2w93	B	99.3	99.8	2	563	-1	-1	-1	P06169-EXP-2w93_B.pdb
P06169	PDC1_YEAST	YLR044C	3	0	Structure	2vk8	A	99.3	99.8	2	563	-1	-1	-1	P06169-EXP-2vk8_A.pdb
P06169	PDC1_YEAST	YLR044C	4	0	Structure	2w93	D	99.3	99.8	2	563	-1	-1	-1	P06169-EXP-2w93_D.pdb
P06169	PDC1_YEAST	YLR044C	5	0	Structure	2vk8	B	99.3	99.8	2	563	-1	-1	-1	P06169-EXP-2vk8_B.pdb
P06169	PDC1_YEAST	YLR044C	6	0	Structure	2vk8	D	99.3	99.8	2	563	-1	-1	-1	P06169-EXP-2vk8_D.pdb
P06169	PDC1_YEAST	YLR044C	7	0	Structure	2vk1	A	99.1	99.8	2	563	-1	-1	-1	P06169-EXP-2vk1_A.pdb
P06169	PDC1_YEAST	YLR044C	8	0	Structure	2vk1	B	99.1	99.8	2	563	-1	-1	-1	P06169-EXP-2vk1_B.pdb
P06169	PDC1_YEAST	YLR044C	9	0	Structure	2vk1	C	99.1	99.8	2	563	-1	-1	-1	P06169-EXP-2vk1_C.pdb
P06169	PDC1_YEAST	YLR044C	10	0	Structure	2vk1	D	99.1	99.8	2	563	-1	-1	-1	P06169-EXP-2vk1_D.pdb
P06169	PDC1_YEAST	YLR044C	11	0	Structure	2w93	A	96.8	99.1	2	559	-1	-1	-1	P06169-EXP-2w93_A.pdb
P06169	PDC1_YEAST	YLR044C	12	0	Structure	2w93	C	99.3	98.9	2	558	-1	-1	-1	P06169-EXP-2w93_C.pdb
P06169	PDC1_YEAST	YLR044C	13	0	Structure	1qpb	B	99.3	98.6	2	556	-1	-1	-1	P06169-EXP-1qpb_B.pdb
P06169	PDC1_YEAST	YLR044C	14	0	Structure	1qpb	A	99.3	98.6	2	556	-1	-1	-1	P06169-EXP-1qpb_A.pdb
P06169	PDC1_YEAST	YLR044C	15	0	Structure	1pyd	A	96.2	98.6	2	556	-1	-1	-1	P06169-EXP-1pyd_A.pdb
P06169	PDC1_YEAST	YLR044C	16	0	Structure	1pyd	B	96.2	98.6	2	556	-1	-1	-1	P06169-EXP-1pyd_B.pdb
P06169	PDC1_YEAST	YLR044C	17	0	Structure	1pvd	B	96.2	98.6	2	556	-1	-1	-1	P06169-EXP-1pvd_B.pdb
P06169	PDC1_YEAST	YLR044C	18	0	Structure	1pvd	A	96.2	98.6	2	556	-1	-1	-1	P06169-EXP-1pvd_A.pdb
P00560	PGK_YEAST	YCR012W	1	0	Structure	1qpg	A	99.8	99.8	2	416	-1	-1	-1	P00560-EXP-1qpg_A.pdb
P00560	PGK_YEAST	YCR012W	2	0	Structure	3pgk	A	97.6	99.8	2	416	-1	-1	-1	P00560-EXP-3pgk_A.pdb
P00560	PGK_YEAST	YCR012W	3	0	Structure	1fw8	A	100	82.5	74	416	-1	-1	-1	P00560-EXP-1fw8_A.pdb
P00560	PGK_YEAST	YCR012W	4	0	Model	1hdi	A	62	98.3	5	413	1	1.836	-1.42	P00560-MDL-P00560.3-1hdi_A.pdb
P32381	ARP2_YEAST	YDL029W	1	0	Model	1d4x	A	49	97.7	6	387	1	0	0	P32381-MDL-P32381.2-1d4x_A.pdb
P32381	ARP2_YEAST	YDL029W	2	0	Model	1d4x	A	48	99	3	389	1	0	0	P32381-MDL-P32381.7-1d4x_A.pdb
P32381	ARP2_YEAST	YDL029W	3	0	Model	1d4x	A	48	99	3	389	1	1.603	-0.96	P32381-MDL-P32381.1-1d4x_A.pdb
P32381	ARP2_YEAST	YDL029W	4	0	Model	1d4x	A	48	99	3	389	1	1.65	-1.42	P32381-MDL-P32381.3-1d4x_A.pdb
P32381	ARP2_YEAST	YDL029W	5	0	Model	1c0g	A	47	99.2	2	389	1	0	0	P32381-MDL-P32381.8-1c0g_A.pdb
P32381	ARP2_YEAST	YDL029W	6	0	Model	1k8k	A	32	99.2	3	390	1	1.364	-0.51	P32381-MDL-P32381.4-1k8k_A.pdb
P32381	ARP2_YEAST	YDL029W	7	1	Model	2p9u	B	74	55.8	139	356	1	1.508	-1.19	P32381-MDL-P32381.5-2p9u_B.pdb
P32381	ARP2_YEAST	YDL029W	8	1	Model	1k8k	B	73	48.6	153	342	1	1.44	-1.32	P32381-MDL-P32381.6-1k8k_B.pdb
P32582	CBS_YEAST	YGR155W	1	1	Model	1jbq	A	55	63.5	13	334	1	1.31	-0.83	P32582-MDL-P32582.7-1jbq_A.pdb
P32582	CBS_YEAST	YGR155W	2	1	Model	1jbq	A	55	63.5	13	334	1	1.35	-1.27	P32582-MDL-P32582.10-1jbq_A.pdb
P32582	CBS_YEAST	YGR155W	3	1	Model	1jbq	A	52	66.7	2	339	1	1.35	-1.17	P32582-MDL-P32582.1-1jbq_A.pdb
P32582	CBS_YEAST	YGR155W	4	1	Model	1jbq	A	51	66.1	5	339	1	0	0	P32582-MDL-P32582.11-1jbq_A.pdb
P32582	CBS_YEAST	YGR155W	5	1	Model	1jbq	D	51	66.1	5	339	1	0	0	P32582-MDL-P32582.8-1jbq_D.pdb
P39676	FHP_YEAST	YGR234W	1	0	Model	1cqx	A	39	98.8	1	394	1	1.416	-0.3	P39676-MDL-P39676.1-1cqx_A.pdb
P39676	FHP_YEAST	YGR234W	2	0	Model	1cqx	A	39	98.8	1	394	1	1.47	-0.9	P39676-MDL-P39676.3-1cqx_A.pdb
P39676	FHP_YEAST	YGR234W	3	0	Model	1cqx	A	36	99.5	1	397	1	1.366	0.07	P39676-MDL-P39676.8-1cqx_A.pdb
P39676	FHP_YEAST	YGR234W	4	0	Model	1cqx	A	36	98.8	1	394	1	0	0	P39676-MDL-P39676.7-1cqx_A.pdb
P39676	FHP_YEAST	YGR234W	5	0	Model	1cqx	A	36	98.8	1	394	1	0	0	P39676-MDL-P39676.5-1cqx_A.pdb
P39676	FHP_YEAST	YGR234W	6	1	Model	1vhb	A	56	36.1	2	145	1	1.104	-1.54	P39676-MDL-P39676.6-1vhb_A.pdb
P32288	GLNA_YEAST	YPR035W	1	0	Structure	3fky	C	98.3	93.5	21	366	-1	-1	-1	P32288-EXP-3fky_C.pdb
P32288	GLNA_YEAST	YPR035W	2	0	Structure	3fky	T	96.5	93.5	21	366	-1	-1	-1	P32288-EXP-3fky_T.pdb
P32288	GLNA_YEAST	YPR035W	3	0	Structure	3fky	L	96.5	93.5	21	366	-1	-1	-1	P32288-EXP-3fky_L.pdb
P32288	GLNA_YEAST	YPR035W	4	0	Structure	3fky	A	96.5	93.5	21	366	-1	-1	-1	P32288-EXP-3fky_A.pdb
P32288	GLNA_YEAST	YPR035W	5	0	Structure	3fky	S	96.5	93.5	21	366	-1	-1	-1	P32288-EXP-3fky_S.pdb
P32288	GLNA_YEAST	YPR035W	6	0	Structure	3fky	M	96.5	93.5	21	366	-1	-1	-1	P32288-EXP-3fky_M.pdb
P32288	GLNA_YEAST	YPR035W	7	0	Structure	3fky	O	96.5	93.5	21	366	-1	-1	-1	P32288-EXP-3fky_O.pdb
P32288	GLNA_YEAST	YPR035W	8	0	Structure	3fky	E	96.5	93.5	21	366	-1	-1	-1	P32288-EXP-3fky_E.pdb
P32288	GLNA_YEAST	YPR035W	9	0	Structure	3fky	R	96.5	93.5	21	366	-1	-1	-1	P32288-EXP-3fky_R.pdb
P32288	GLNA_YEAST	YPR035W	10	0	Structure	3fky	D	96.5	93.5	21	366	-1	-1	-1	P32288-EXP-3fky_D.pdb
P32288	GLNA_YEAST	YPR035W	11	0	Structure	3fky	I	96.5	93.5	21	366	-1	-1	-1	P32288-EXP-3fky_I.pdb
P32288	GLNA_YEAST	YPR035W	12	0	Structure	3fky	P	96.5	93.5	21	366	-1	-1	-1	P32288-EXP-3fky_P.pdb
P32288	GLNA_YEAST	YPR035W	13	0	Structure	3fky	H	96.5	93.5	21	366	-1	-1	-1	P32288-EXP-3fky_H.pdb
P32288	GLNA_YEAST	YPR035W	14	0	Structure	3fky	N	96.5	93.5	21	366	-1	-1	-1	P32288-EXP-3fky_N.pdb
P32288	GLNA_YEAST	YPR035W	15	0	Structure	3fky	G	96.5	93.5	21	366	-1	-1	-1	P32288-EXP-3fky_G.pdb
P32288	GLNA_YEAST	YPR035W	16	0	Structure	3fky	K	96.5	93.5	21	366	-1	-1	-1	P32288-EXP-3fky_K.pdb
P32288	GLNA_YEAST	YPR035W	17	0	Structure	3fky	J	96.5	93.5	21	366	-1	-1	-1	P32288-EXP-3fky_J.pdb
P32288	GLNA_YEAST	YPR035W	18	0	Structure	3fky	F	96.5	93.5	21	366	-1	-1	-1	P32288-EXP-3fky_F.pdb
P32288	GLNA_YEAST	YPR035W	19	0	Structure	3fky	Q	96.5	93.5	21	366	-1	-1	-1	P32288-EXP-3fky_Q.pdb
P32288	GLNA_YEAST	YPR035W	20	0	Structure	3fky	B	96.5	93.5	21	366	-1	-1	-1	P32288-EXP-3fky_B.pdb
Q03558	OYE2_YEAST	YHR179W	1	0	Model	1oya		92	99.8	2	400	1	2.1	-2.08	Q03558-MDL-Q03558.4-1oya_.pdb
Q03558	OYE2_YEAST	YHR179W	2	0	Model	1oya		92	99.5	2	399	1	2.21	-2.11	Q03558-MDL-Q03558.9-1oya_.pdb
Q03558	OYE2_YEAST	YHR179W	3	0	Model	1oya		92	99.5	2	399	1	0	0	Q03558-MDL-Q03558.11-1oya_.pdb
Q03558	OYE2_YEAST	YHR179W	4	0	Model	1bwk	A	92	99.5	3	400	1	2.183	-1.76	Q03558-MDL-Q03558.3-1bwk_A.pdb
Q03558	OYE2_YEAST	YHR179W	5	0	Model	1oya		92	99.2	3	399	1	0	0	Q03558-MDL-Q03558.8-1oya_.pdb
Q03558	OYE2_YEAST	YHR179W	6	0	Model	1bwk	A	91	99.8	2	400	1	2.176	-1.76	Q03558-MDL-Q03558.13-1bwk_A.pdb
Q03558	OYE2_YEAST	YHR179W	7	1	Model	1oya		89	1	3	399	1	0	0	Q03558-MDL-Q03558.15-1oya_.pdb
P15705	STI1_YEAST	YOR027W	1	1	Model	1na0	A	32	20	4	121	1	0	0	P15705-MDL-P15705.1-1na0_A.pdb
P15705	STI1_YEAST	YOR027W	1	2	Structure	2llv	A	100	12.1	127	197	-1	-1	-1	P15705-EXP-2llv_A.pdb
P15705	STI1_YEAST	YOR027W	1	3	Structure	3uq3	A	100	43.1	262	515	-1	-1	-1	P15705-EXP-3uq3_A.pdb
P15705	STI1_YEAST	YOR027W	1	4	Structure	2llw	A	100	12.1	519	589	-1	-1	-1	P15705-EXP-2llw_A.pdb
P15705	STI1_YEAST	YOR027W	2	1	Structure	3upv	A	100	20.9	395	517	-1	-1	-1	P15705-EXP-3upv_A.pdb
Q01519	COX12_YEAST	YLR038C	1	0	Model	2dyr	H	49	84.3	11	80	1	1.503	-1.18	Q01519-MDL-Q01519.2-2dyr_H.pdb
Q01519	COX12_YEAST	YLR038C	2	0	Model	1v54	H	49	84.3	11	80	1	1.48	-0.98	Q01519-MDL-Q01519.3-1v54_H.pdb
Q01519	COX12_YEAST	YLR038C	3	0	Model	1v54	H	48	85.5	10	80	1	0	0	Q01519-MDL-Q01519.5-1v54_H.pdb
Q01519	COX12_YEAST	YLR038C	4	0	Model	2dyr	H	47	86.8	9	80	1	1.403	-1.01	Q01519-MDL-Q01519.1-2dyr_H.pdb
Q01519	COX12_YEAST	YLR038C	5	0	Model	1v54	H	47	86.8	9	80	1	1.48	-0.96	Q01519-MDL-Q01519.4-1v54_H.pdb
Q01519	COX12_YEAST	YLR038C	6	0	Model	1v54	H	45	91.6	5	80	1	0	0	Q01519-MDL-Q01519.6-1v54_H.pdb
Q01519	COX12_YEAST	YLR038C	7	1	Model	1v54	H	48	0.9	10	80	1	0	0	Q01519-MDL-Q01519.7-1v54_H.pdb
P04037	COX4_YEAST	YGL187C	1	1	Structure	1hr8	O	100	8.4	7	19	-1	-1	-1	P04037-EXP-1hr8_O.pdb
P04037	COX4_YEAST	YGL187C	1	2	Structure	2odx	A	100	34.8	94	147	-1	-1	-1	P04037-EXP-2odx_A.pdb
P04037	COX4_YEAST	YGL187C	2	1	Structure	1hr8	Q	100	6.5	10	19	-1	-1	-1	P04037-EXP-1hr8_Q.pdb
P04037	COX4_YEAST	YGL187C	2	2	Model	1v54	F	36	64.5	51	150	0.97	0	0	P04037-MDL-P04037.4-1v54_F.pdb
P04037	COX4_YEAST	YGL187C	3	1	Structure	1hr8	P	100	5.8	10	18	-1	-1	-1	P04037-EXP-1hr8_P.pdb
P04037	COX4_YEAST	YGL187C	3	2	Model	1v54	F	35	64.5	51	150	0.95	0	0	P04037-MDL-P04037.5-1v54_F.pdb
P04037	COX4_YEAST	YGL187C	4	1	Structure	1hr8	R	100	4.5	12	18	-1	-1	-1	P04037-EXP-1hr8_R.pdb
P00427	COX6_YEAST	YHR051W	1	1	Model	1v54	E	41	66.2	46	143	1	0	0	P00427-MDL-P00427.2-1v54_E.pdb
P00427	COX6_YEAST	YHR051W	2	1	Model	1v54	E	41	66.2	46	143	1	1.39	-2.46	P00427-MDL-P00427.6-1v54_E.pdb
P00427	COX6_YEAST	YHR051W	3	1	Model	2dyr	E	41	66.2	46	143	1	1.355	-2.09	P00427-MDL-P00427.4-2dyr_E.pdb
P00427	COX6_YEAST	YHR051W	4	1	Model	1v54	E	41	66.2	46	143	1	0	0	P00427-MDL-P00427.1-1v54_E.pdb
P00427	COX6_YEAST	YHR051W	5	1	Model	2dyr	E	39	68.9	46	147	1	1.219	-1.82	P00427-MDL-P00427.3-2dyr_E.pdb
P00427	COX6_YEAST	YHR051W	6	1	Model	2dyr	E	41	65.5	47	143	1	1.368	-2.33	P00427-MDL-P00427.5-2dyr_E.pdb
P87108	TIM10_YEAST	YHR005C-A	1	0	Model	2bsk	D	35	84.9	14	92	1	1.305	-0.27	P87108-MDL-P87108.3-2bsk_D.pdb
P87108	TIM10_YEAST	YHR005C-A	2	1	Structure	3dxr	B	100	74.2	15	83	-1	-1	-1	P87108-EXP-3dxr_B.pdb
P87108	TIM10_YEAST	YHR005C-A	3	1	Model	2bsk	B	35	69.9	24	88	1	1.21	-0.7	P87108-MDL-P87108.4-2bsk_B.pdb
P87108	TIM10_YEAST	YHR005C-A	4	1	Model	2bsk	B	39	63.4	25	83	1	1.21	-0.96	P87108-MDL-P87108.2-2bsk_B.pdb
P32830	TIM12_YEAST	YBR091C	1	1	Model	3dxr	B	36	64.2	15	84	0.98	1.117	-0.33	P32830-MDL-P32830.6-3dxr_B.pdb
O74700	TIM9_YEAST	YEL020W-A	1	1	Structure	3dxr	A	100	79.3	12	80	-1	-1	-1	O74700-EXP-3dxr_A.pdb
O74700	TIM9_YEAST	YEL020W-A	2	1	Model	2bsk	A	48	77	20	86	1	1.32	-0.27	O74700-MDL-O74700.2-2bsk_A.pdb
O74700	TIM9_YEAST	YEL020W-A	3	1	Model	2bsk	E	45	69	20	79	1	1.25	-1.57	O74700-MDL-O74700.3-2bsk_E.pdb
P07143	CY1_YEAST	YOR065W	1	0	Structure	3cx5	D	100	80.3	62	309	-1	-1	-1	P07143-EXP-3cx5_D.pdb
P07143	CY1_YEAST	YOR065W	2	0	Structure	3cx5	O	100	80.3	62	309	-1	-1	-1	P07143-EXP-3cx5_O.pdb
P07143	CY1_YEAST	YOR065W	3	1	Structure	3cxh	O	100	79.6	62	307	-1	-1	-1	P07143-EXP-3cxh_O.pdb
P07143	CY1_YEAST	YOR065W	4	1	Structure	1kb9	D	100	79.6	62	307	-1	-1	-1	P07143-EXP-1kb9_D.pdb
P07143	CY1_YEAST	YOR065W	5	1	Structure	3cxh	D	100	79.6	62	307	-1	-1	-1	P07143-EXP-3cxh_D.pdb
P07143	CY1_YEAST	YOR065W	6	1	Structure	1p84	D	100	79.6	62	307	-1	-1	-1	P07143-EXP-1p84_D.pdb
P07143	CY1_YEAST	YOR065W	7	1	Structure	1ezv	D	100	79.3	62	306	-1	-1	-1	P07143-EXP-1ezv_D.pdb
P07143	CY1_YEAST	YOR065W	8	1	Structure	2ibz	D	100	79.3	62	306	-1	-1	-1	P07143-EXP-2ibz_D.pdb
P07143	CY1_YEAST	YOR065W	9	1	Structure	1kyo	D	100	79.3	62	306	-1	-1	-1	P07143-EXP-1kyo_D.pdb
P07143	CY1_YEAST	YOR065W	10	1	Structure	1kyo	O	100	79.3	62	306	-1	-1	-1	P07143-EXP-1kyo_O.pdb
P00127	QCR6_YEAST	YFR033C	1	1	Structure	1kb9	F	100	50.3	74	147	-1	-1	-1	P00127-EXP-1kb9_F.pdb
P00127	QCR6_YEAST	YFR033C	2	1	Structure	3cx5	Q	100	50.3	74	147	-1	-1	-1	P00127-EXP-3cx5_Q.pdb
P00127	QCR6_YEAST	YFR033C	3	1	Structure	1p84	F	100	50.3	74	147	-1	-1	-1	P00127-EXP-1p84_F.pdb
P00127	QCR6_YEAST	YFR033C	4	1	Structure	1ezv	H	100	50.3	74	147	-1	-1	-1	P00127-EXP-1ezv_H.pdb
P00127	QCR6_YEAST	YFR033C	5	1	Structure	2ibz	H	100	50.3	74	147	-1	-1	-1	P00127-EXP-2ibz_H.pdb
P00127	QCR6_YEAST	YFR033C	6	1	Structure	3cx5	F	100	50.3	74	147	-1	-1	-1	P00127-EXP-3cx5_F.pdb
P00127	QCR6_YEAST	YFR033C	7	1	Structure	3cxh	Q	100	50.3	74	147	-1	-1	-1	P00127-EXP-3cxh_Q.pdb
P00127	QCR6_YEAST	YFR033C	8	1	Structure	3cxh	F	100	50.3	74	147	-1	-1	-1	P00127-EXP-3cxh_F.pdb
P00127	QCR6_YEAST	YFR033C	9	1	Structure	1kyo	Q	100	49.7	75	147	-1	-1	-1	P00127-EXP-1kyo_Q.pdb
P00127	QCR6_YEAST	YFR033C	10	1	Structure	1kyo	F	100	49.7	75	147	-1	-1	-1	P00127-EXP-1kyo_F.pdb
P00127	QCR6_YEAST	YFR033C	11	1	Model	1l0l	H	40	57.8	63	147	1	0	0	P00127-MDL-P00127.2-1l0l_H.pdb
P00128	QCR7_YEAST	YDR529C	1	0	Structure	3cx5	G	100	99.2	2	127	-1	-1	-1	P00128-EXP-3cx5_G.pdb
P00128	QCR7_YEAST	YDR529C	2	0	Structure	3cx5	R	100	99.2	2	127	-1	-1	-1	P00128-EXP-3cx5_R.pdb
P00128	QCR7_YEAST	YDR529C	3	0	Structure	2ibz	F	100	98.4	3	127	-1	-1	-1	P00128-EXP-2ibz_F.pdb
P00128	QCR7_YEAST	YDR529C	4	0	Structure	1p84	G	100	98.4	3	127	-1	-1	-1	P00128-EXP-1p84_G.pdb
P00128	QCR7_YEAST	YDR529C	5	0	Structure	1ezv	F	100	98.4	3	127	-1	-1	-1	P00128-EXP-1ezv_F.pdb
P00128	QCR7_YEAST	YDR529C	6	0	Structure	1kyo	R	100	98.4	3	127	-1	-1	-1	P00128-EXP-1kyo_R.pdb
P00128	QCR7_YEAST	YDR529C	7	0	Structure	3cxh	G	100	98.4	3	127	-1	-1	-1	P00128-EXP-3cxh_G.pdb
P00128	QCR7_YEAST	YDR529C	8	0	Structure	1kyo	G	100	98.4	3	127	-1	-1	-1	P00128-EXP-1kyo_G.pdb
P00128	QCR7_YEAST	YDR529C	9	0	Structure	3cxh	R	100	98.4	3	127	-1	-1	-1	P00128-EXP-3cxh_R.pdb
P00128	QCR7_YEAST	YDR529C	10	0	Structure	1kb9	G	100	98.4	3	127	-1	-1	-1	P00128-EXP-1kb9_G.pdb
P08067	UCRI_YEAST	YEL024W	1	0	Structure	3cxh	E	100	86	31	215	-1	-1	-1	P08067-EXP-3cxh_E.pdb
P08067	UCRI_YEAST	YEL024W	2	0	Structure	1kyo	E	100	86	31	215	-1	-1	-1	P08067-EXP-1kyo_E.pdb
P08067	UCRI_YEAST	YEL024W	3	0	Structure	3cx5	E	100	86	31	215	-1	-1	-1	P08067-EXP-3cx5_E.pdb
P08067	UCRI_YEAST	YEL024W	4	0	Structure	1kb9	E	100	86	31	215	-1	-1	-1	P08067-EXP-1kb9_E.pdb
P08067	UCRI_YEAST	YEL024W	5	0	Structure	1ezv	E	100	86	31	215	-1	-1	-1	P08067-EXP-1ezv_E.pdb
P08067	UCRI_YEAST	YEL024W	6	0	Structure	3cxh	P	100	86	31	215	-1	-1	-1	P08067-EXP-3cxh_P.pdb
P08067	UCRI_YEAST	YEL024W	7	0	Structure	1kyo	P	100	86	31	215	-1	-1	-1	P08067-EXP-1kyo_P.pdb
P08067	UCRI_YEAST	YEL024W	8	0	Structure	1p84	E	100	86	31	215	-1	-1	-1	P08067-EXP-1p84_E.pdb
P08067	UCRI_YEAST	YEL024W	9	0	Structure	2ibz	E	100	86	31	215	-1	-1	-1	P08067-EXP-2ibz_E.pdb
P08067	UCRI_YEAST	YEL024W	10	0	Structure	3cx5	P	100	86	31	215	-1	-1	-1	P08067-EXP-3cx5_P.pdb
P08067	UCRI_YEAST	YEL024W	11	0	Model	1bcc	E	54	87	28	214	1	0	0	P08067-MDL-P08067.1-1bcc_E.pdb
P08067	UCRI_YEAST	YEL024W	12	0	Model	1bcc	E	53	87	28	214	1	0	0	P08067-MDL-P08067.5-1bcc_E.pdb
P08067	UCRI_YEAST	YEL024W	13	0	Model	3cwb	E	51	89.3	23	214	1	1.391	0.58	P08067-MDL-P08067.3-3cwb_E.pdb
P08067	UCRI_YEAST	YEL024W	14	1	Model	1rie	A	63	56.7	93	214	1	1.356	-1.37	P08067-MDL-P08067.4-1rie_A.pdb
P07257	QCR2_YEAST	YPR191W	1	0	Structure	1kyo	B	100	95.7	17	368	-1	-1	-1	P07257-EXP-1kyo_B.pdb
P07257	QCR2_YEAST	YPR191W	2	0	Structure	3cxh	B	100	95.7	17	368	-1	-1	-1	P07257-EXP-3cxh_B.pdb
P07257	QCR2_YEAST	YPR191W	3	0	Structure	3cx5	M	100	95.7	17	368	-1	-1	-1	P07257-EXP-3cx5_M.pdb
P07257	QCR2_YEAST	YPR191W	4	0	Structure	1kyo	M	100	95.7	17	368	-1	-1	-1	P07257-EXP-1kyo_M.pdb
P07257	QCR2_YEAST	YPR191W	5	0	Structure	3cx5	B	100	95.7	17	368	-1	-1	-1	P07257-EXP-3cx5_B.pdb
P07257	QCR2_YEAST	YPR191W	6	0	Structure	3cxh	M	100	95.7	17	368	-1	-1	-1	P07257-EXP-3cxh_M.pdb
P07257	QCR2_YEAST	YPR191W	7	0	Structure	1kb9	B	100	95.7	17	368	-1	-1	-1	P07257-EXP-1kb9_B.pdb
P07257	QCR2_YEAST	YPR191W	8	0	Structure	1ezv	B	100	95.7	17	368	-1	-1	-1	P07257-EXP-1ezv_B.pdb
P07257	QCR2_YEAST	YPR191W	9	0	Structure	2ibz	B	100	95.7	17	368	-1	-1	-1	P07257-EXP-2ibz_B.pdb
P07257	QCR2_YEAST	YPR191W	10	0	Structure	1p84	B	100	95.7	17	368	-1	-1	-1	P07257-EXP-1p84_B.pdb
P32324	EF2_YEAST	YOR133W	1	0	Structure	2e1r	A	98.3	100	1	842	-1	-1	-1	P32324-EXP-2e1r_A.pdb
P32324	EF2_YEAST	YOR133W	2	0	Structure	1n0v	C	98.1	99.9	2	842	-1	-1	-1	P32324-EXP-1n0v_C.pdb
P32324	EF2_YEAST	YOR133W	3	0	Structure	1n0v	D	98.1	99.9	2	842	-1	-1	-1	P32324-EXP-1n0v_D.pdb
P32324	EF2_YEAST	YOR133W	4	0	Structure	1zm2	E	97.7	99.9	2	842	-1	-1	-1	P32324-EXP-1zm2_E.pdb
P32324	EF2_YEAST	YOR133W	5	0	Structure	1zm4	E	97.7	99.9	2	842	-1	-1	-1	P32324-EXP-1zm4_E.pdb
P32324	EF2_YEAST	YOR133W	6	0	Structure	3b82	A	97.7	99.9	2	842	-1	-1	-1	P32324-EXP-3b82_A.pdb
P32324	EF2_YEAST	YOR133W	7	0	Structure	1zm9	E	97.7	99.9	2	842	-1	-1	-1	P32324-EXP-1zm9_E.pdb
P32324	EF2_YEAST	YOR133W	8	0	Structure	3b78	C	97.7	99.9	2	842	-1	-1	-1	P32324-EXP-3b78_C.pdb
P32324	EF2_YEAST	YOR133W	9	0	Structure	1zm4	C	97.7	99.9	2	842	-1	-1	-1	P32324-EXP-1zm4_C.pdb
P32324	EF2_YEAST	YOR133W	10	0	Structure	1zm3	C	97.7	99.9	2	842	-1	-1	-1	P32324-EXP-1zm3_C.pdb
P32324	EF2_YEAST	YOR133W	11	0	Structure	1zm4	A	97.7	99.9	2	842	-1	-1	-1	P32324-EXP-1zm4_A.pdb
P32324	EF2_YEAST	YOR133W	12	0	Structure	2zit	E	97.7	99.9	2	842	-1	-1	-1	P32324-EXP-2zit_E.pdb
P32324	EF2_YEAST	YOR133W	13	0	Structure	3b82	E	97.7	99.9	2	842	-1	-1	-1	P32324-EXP-3b82_E.pdb
P32324	EF2_YEAST	YOR133W	14	0	Structure	1zm9	C	97.7	99.9	2	842	-1	-1	-1	P32324-EXP-1zm9_C.pdb
P32324	EF2_YEAST	YOR133W	15	0	Structure	1zm2	A	97.7	99.9	2	842	-1	-1	-1	P32324-EXP-1zm2_A.pdb
P32324	EF2_YEAST	YOR133W	16	0	Structure	3b8h	A	97.7	99.9	2	842	-1	-1	-1	P32324-EXP-3b8h_A.pdb
P32324	EF2_YEAST	YOR133W	17	0	Structure	3b8h	C	97.7	99.9	2	842	-1	-1	-1	P32324-EXP-3b8h_C.pdb
P32324	EF2_YEAST	YOR133W	18	0	Structure	1zm2	C	97.7	99.9	2	842	-1	-1	-1	P32324-EXP-1zm2_C.pdb
P32324	EF2_YEAST	YOR133W	19	0	Structure	3b82	C	97.7	99.9	2	842	-1	-1	-1	P32324-EXP-3b82_C.pdb
P32324	EF2_YEAST	YOR133W	20	0	Structure	3b8h	E	97.7	99.9	2	842	-1	-1	-1	P32324-EXP-3b8h_E.pdb
P32324	EF2_YEAST	YOR133W	21	0	Structure	1zm3	A	97.7	99.9	2	842	-1	-1	-1	P32324-EXP-1zm3_A.pdb
P32324	EF2_YEAST	YOR133W	22	0	Structure	1zm9	A	97.7	99.9	2	842	-1	-1	-1	P32324-EXP-1zm9_A.pdb
P32324	EF2_YEAST	YOR133W	23	0	Structure	2zit	A	97.7	99.9	2	842	-1	-1	-1	P32324-EXP-2zit_A.pdb
P32324	EF2_YEAST	YOR133W	24	0	Structure	3b78	A	97.7	99.9	2	842	-1	-1	-1	P32324-EXP-3b78_A.pdb
P32324	EF2_YEAST	YOR133W	25	0	Structure	1zm3	E	97.7	99.9	2	842	-1	-1	-1	P32324-EXP-1zm3_E.pdb
P32324	EF2_YEAST	YOR133W	26	0	Structure	3b78	E	97.7	99.9	2	842	-1	-1	-1	P32324-EXP-3b78_E.pdb
P32324	EF2_YEAST	YOR133W	27	0	Structure	2zit	C	97.7	99.9	2	842	-1	-1	-1	P32324-EXP-2zit_C.pdb
P32324	EF2_YEAST	YOR133W	28	0	Structure	2npf	A	97.9	99.8	3	842	-1	-1	-1	P32324-EXP-2npf_A.pdb
P32324	EF2_YEAST	YOR133W	29	0	Structure	1s1h	T	97.5	99.8	3	842	-1	-1	-1	P32324-EXP-1s1h_T.pdb
P32324	EF2_YEAST	YOR133W	30	0	Structure	1n0u	A	97.5	99.8	3	842	-1	-1	-1	P32324-EXP-1n0u_A.pdb
P32324	EF2_YEAST	YOR133W	31	0	Structure	1u2r	A	97.4	99.8	3	842	-1	-1	-1	P32324-EXP-1u2r_A.pdb
P32324	EF2_YEAST	YOR133W	32	0	Structure	2p8w	T	96.9	99.8	3	842	-1	-1	-1	P32324-EXP-2p8w_T.pdb
P32324	EF2_YEAST	YOR133W	33	0	Structure	2npf	B	96.8	99.8	3	842	-1	-1	-1	P32324-EXP-2npf_B.pdb
P32324	EF2_YEAST	YOR133W	34	0	Structure	2p8y	T	96.8	99.8	3	842	-1	-1	-1	P32324-EXP-2p8y_T.pdb
P32324	EF2_YEAST	YOR133W	35	0	Structure	2p8z	T	96.8	99.8	3	842	-1	-1	-1	P32324-EXP-2p8z_T.pdb
P32324	EF2_YEAST	YOR133W	36	0	Structure	2p8x	T	96.8	99.8	3	842	-1	-1	-1	P32324-EXP-2p8x_T.pdb
P32324	EF2_YEAST	YOR133W	37	0	Structure	3dny	T	82	94.8	3	800	-1	-1	-1	P32324-EXP-3dny_T.pdb
P07149	FAS1_YEAST	YKL182W	1	0	Structure	2vkz	H	99.4	99.8	5	2050	-1	-1	-1	P07149-EXP-2vkz_H.pdb
P07149	FAS1_YEAST	YKL182W	2	0	Structure	2uv8	I	99.4	99.8	5	2050	-1	-1	-1	P07149-EXP-2uv8_I.pdb
P07149	FAS1_YEAST	YKL182W	3	0	Structure	2uv8	G	99.4	99.8	5	2050	-1	-1	-1	P07149-EXP-2uv8_G.pdb
P07149	FAS1_YEAST	YKL182W	4	0	Structure	2vkz	I	99.4	99.8	5	2050	-1	-1	-1	P07149-EXP-2vkz_I.pdb
P07149	FAS1_YEAST	YKL182W	5	0	Structure	3hmj	I	99.4	99.8	5	2050	-1	-1	-1	P07149-EXP-3hmj_I.pdb
P07149	FAS1_YEAST	YKL182W	6	0	Structure	2uv8	H	99.4	99.8	5	2050	-1	-1	-1	P07149-EXP-2uv8_H.pdb
P07149	FAS1_YEAST	YKL182W	7	0	Structure	3hmj	G	99.4	99.8	5	2050	-1	-1	-1	P07149-EXP-3hmj_G.pdb
P07149	FAS1_YEAST	YKL182W	8	0	Structure	3hmj	H	99.4	99.8	5	2050	-1	-1	-1	P07149-EXP-3hmj_H.pdb
P07149	FAS1_YEAST	YKL182W	9	0	Structure	2vkz	G	99.4	99.8	5	2050	-1	-1	-1	P07149-EXP-2vkz_G.pdb
P07149	FAS1_YEAST	YKL182W	10	0	Structure	2pff	E	42.1	94.6	1	1941	-1	-1	-1	P07149-EXP-2pff_E.pdb
P07149	FAS1_YEAST	YKL182W	11	0	Structure	2pff	H	42.1	94.6	1	1941	-1	-1	-1	P07149-EXP-2pff_H.pdb
P07149	FAS1_YEAST	YKL182W	12	0	Structure	2pff	B	42.1	94.6	1	1941	-1	-1	-1	P07149-EXP-2pff_B.pdb
P07149	FAS1_YEAST	YKL182W	13	1	Model	1mla		34	12	1662	1908	0.97	0	0	P07149-MDL-P07149.4-1mla_.pdb
P38011	GBLP_YEAST	YMR116C	1	0	Structure	3izb	a	100	100	1	319	-1	-1	-1	P38011-EXP-3izb_a.pdb
P38011	GBLP_YEAST	YMR116C	2	0	Structure	3o30	T	98.1	100	1	319	-1	-1	-1	P38011-EXP-3o30_T.pdb
P38011	GBLP_YEAST	YMR116C	3	0	Structure	3o2z	T	98.1	100	1	319	-1	-1	-1	P38011-EXP-3o2z_T.pdb
P38011	GBLP_YEAST	YMR116C	4	0	Structure	3u5g	g	100	99.7	2	319	-1	-1	-1	P38011-EXP-3u5g_g.pdb
P38011	GBLP_YEAST	YMR116C	5	0	Structure	3u5c	g	100	99.7	2	319	-1	-1	-1	P38011-EXP-3u5c_g.pdb
P38011	GBLP_YEAST	YMR116C	6	0	Structure	3frx	B	96.2	99.7	2	319	-1	-1	-1	P38011-EXP-3frx_B.pdb
P38011	GBLP_YEAST	YMR116C	7	0	Structure	3frx	D	96.2	99.7	2	319	-1	-1	-1	P38011-EXP-3frx_D.pdb
P38011	GBLP_YEAST	YMR116C	8	0	Structure	3frx	A	96.2	98.7	4	318	-1	-1	-1	P38011-EXP-3frx_A.pdb
P38011	GBLP_YEAST	YMR116C	9	0	Structure	3rfh	A	92.1	98.7	3	317	-1	-1	-1	P38011-EXP-3rfh_A.pdb
P38011	GBLP_YEAST	YMR116C	10	0	Structure	3rfh	B	91.7	98.7	3	317	-1	-1	-1	P38011-EXP-3rfh_B.pdb
P38011	GBLP_YEAST	YMR116C	11	0	Structure	1trj	A	100	98.4	1	314	-1	-1	-1	P38011-EXP-1trj_A.pdb
P38011	GBLP_YEAST	YMR116C	12	0	Structure	3frx	C	96.2	98.4	5	318	-1	-1	-1	P38011-EXP-3frx_C.pdb
P38011	GBLP_YEAST	YMR116C	13	0	Structure	3jyv	R	100	98.1	7	319	-1	-1	-1	P38011-EXP-3jyv_R.pdb
P38011	GBLP_YEAST	YMR116C	14	0	Structure	3rfh	D	98.1	97.8	5	316	-1	-1	-1	P38011-EXP-3rfh_D.pdb
P38011	GBLP_YEAST	YMR116C	15	0	Structure	3rfg	B	92.3	97.8	6	317	-1	-1	-1	P38011-EXP-3rfg_B.pdb
P38011	GBLP_YEAST	YMR116C	16	0	Structure	3rfg	A	92.3	97.8	6	317	-1	-1	-1	P38011-EXP-3rfg_A.pdb
P38011	GBLP_YEAST	YMR116C	17	0	Structure	3rfh	C	92.6	97.5	6	316	-1	-1	-1	P38011-EXP-3rfh_C.pdb
P38011	GBLP_YEAST	YMR116C	18	0	Model	1got	B	27	95.3	10	313	1	1.31	-0.83	P38011-MDL-P38011.19-1got_B.pdb
P38011	GBLP_YEAST	YMR116C	19	1	Model	2h14	A	33	79.6	12	265	0.99	1.17	-0.29	P38011-MDL-P38011.1-2h14_A.pdb
P07342	ILVB_YEAST	YMR108W	1	0	Structure	1n0h	A	99	88.1	83	687	-1	-1	-1	P07342-EXP-1n0h_A.pdb
P07342	ILVB_YEAST	YMR108W	2	0	Structure	1n0h	B	98.8	88.1	83	687	-1	-1	-1	P07342-EXP-1n0h_B.pdb
P07342	ILVB_YEAST	YMR108W	3	0	Structure	1t9a	A	98.8	87.9	84	687	-1	-1	-1	P07342-EXP-1t9a_A.pdb
P07342	ILVB_YEAST	YMR108W	4	0	Structure	1t9c	B	98.2	87.9	84	687	-1	-1	-1	P07342-EXP-1t9c_B.pdb
P07342	ILVB_YEAST	YMR108W	5	0	Structure	1t9a	B	98.2	87.9	84	687	-1	-1	-1	P07342-EXP-1t9a_B.pdb
P07342	ILVB_YEAST	YMR108W	6	0	Structure	1t9c	A	98.8	87.8	85	687	-1	-1	-1	P07342-EXP-1t9c_A.pdb
P07342	ILVB_YEAST	YMR108W	7	0	Structure	1t9d	D	98.8	87.8	85	687	-1	-1	-1	P07342-EXP-1t9d_D.pdb
P07342	ILVB_YEAST	YMR108W	8	0	Structure	1t9d	A	98.8	87.8	85	687	-1	-1	-1	P07342-EXP-1t9d_A.pdb
P07342	ILVB_YEAST	YMR108W	9	0	Structure	1t9b	B	98.7	87.8	85	687	-1	-1	-1	P07342-EXP-1t9b_B.pdb
P07342	ILVB_YEAST	YMR108W	10	0	Structure	1t9b	A	96.7	87.8	85	687	-1	-1	-1	P07342-EXP-1t9b_A.pdb
P07342	ILVB_YEAST	YMR108W	11	0	Structure	1t9d	B	96.7	87.6	86	687	-1	-1	-1	P07342-EXP-1t9d_B.pdb
P07342	ILVB_YEAST	YMR108W	12	0	Structure	1t9d	C	96	87.2	89	687	-1	-1	-1	P07342-EXP-1t9d_C.pdb
P07342	ILVB_YEAST	YMR108W	13	0	Structure	1jsc	B	96.8	82.7	82	649	-1	-1	-1	P07342-EXP-1jsc_B.pdb
P07342	ILVB_YEAST	YMR108W	14	0	Structure	1jsc	A	95.6	82.4	83	648	-1	-1	-1	P07342-EXP-1jsc_A.pdb
P07259	PYR1_YEAST	YJL130C	1	1	Model	1a9x	A	42	48.1	435	1499	1	1.1	-1.51	P07259-MDL-P07259.42-1a9x_A.pdb
P07259	PYR1_YEAST	YJL130C	1	2	Model	1ml4	A	48	13.8	1907	2212	1	0	0	P07259-MDL-P07259.35-1ml4_A.pdb
P07259	PYR1_YEAST	YJL130C	2	1	Model	1a9x	A	41	48.2	433	1499	1	1.1	-1.59	P07259-MDL-P07259.38-1a9x_A.pdb
P07259	PYR1_YEAST	YJL130C	2	2	Model	1ml4	A	48	13.8	1908	2212	1	0	0	P07259-MDL-P07259.5-1ml4_A.pdb
P07259	PYR1_YEAST	YJL130C	3	1	Model	1a9x	A	41	48.2	439	1505	1	0	0	P07259-MDL-P07259.22-1a9x_A.pdb
P07259	PYR1_YEAST	YJL130C	3	2	Model	3csu	A	43	14	1906	2214	1	0	0	P07259-MDL-P07259.47-3csu_A.pdb
P07259	PYR1_YEAST	YJL130C	4	1	Model	1a9x	A	41	48	439	1501	1	0	0	P07259-MDL-P07259.6-1a9x_A.pdb
P08518	RPB2_YEAST	YOR151C	1	0	Structure	2ja5	B	92.4	98.6	18	1224	-1	-1	-1	P08518-EXP-2ja5_B.pdb
P08518	RPB2_YEAST	YOR151C	2	0	Structure	2ja8	B	92.4	98.6	18	1224	-1	-1	-1	P08518-EXP-2ja8_B.pdb
P08518	RPB2_YEAST	YOR151C	3	0	Structure	2ja6	B	92.4	98.6	18	1224	-1	-1	-1	P08518-EXP-2ja6_B.pdb
P08518	RPB2_YEAST	YOR151C	4	0	Structure	2ja7	B	92.4	98.6	18	1224	-1	-1	-1	P08518-EXP-2ja7_B.pdb
P08518	RPB2_YEAST	YOR151C	5	0	Structure	2ja7	N	92.4	98.6	18	1224	-1	-1	-1	P08518-EXP-2ja7_N.pdb
P08518	RPB2_YEAST	YOR151C	6	0	Structure	2nvy	B	90.6	98.6	18	1224	-1	-1	-1	P08518-EXP-2nvy_B.pdb
P08518	RPB2_YEAST	YOR151C	7	0	Structure	1i50	B	90.6	98.6	18	1224	-1	-1	-1	P08518-EXP-1i50_B.pdb
P08518	RPB2_YEAST	YOR151C	8	0	Structure	1twf	B	90.6	98.6	18	1224	-1	-1	-1	P08518-EXP-1twf_B.pdb
P08518	RPB2_YEAST	YOR151C	9	0	Structure	1twh	B	90.4	98.6	18	1224	-1	-1	-1	P08518-EXP-1twh_B.pdb
P08518	RPB2_YEAST	YOR151C	10	0	Structure	1twa	B	90.4	98.6	18	1224	-1	-1	-1	P08518-EXP-1twa_B.pdb
P08518	RPB2_YEAST	YOR151C	11	0	Structure	1twg	B	90.4	98.6	18	1224	-1	-1	-1	P08518-EXP-1twg_B.pdb
P08518	RPB2_YEAST	YOR151C	12	0	Structure	1twc	B	90.4	98.6	18	1224	-1	-1	-1	P08518-EXP-1twc_B.pdb
P08518	RPB2_YEAST	YOR151C	13	0	Structure	1k83	B	89.6	98.6	18	1224	-1	-1	-1	P08518-EXP-1k83_B.pdb
P08518	RPB2_YEAST	YOR151C	14	0	Structure	2r93	B	92.2	98.5	19	1224	-1	-1	-1	P08518-EXP-2r93_B.pdb
P08518	RPB2_YEAST	YOR151C	15	0	Structure	2r92	B	92.2	98.5	19	1224	-1	-1	-1	P08518-EXP-2r92_B.pdb
P08518	RPB2_YEAST	YOR151C	16	0	Structure	4bbs	B	95.4	98.4	20	1224	-1	-1	-1	P08518-EXP-4bbs_B.pdb
P08518	RPB2_YEAST	YOR151C	17	0	Structure	4bbr	B	95.4	98.4	20	1224	-1	-1	-1	P08518-EXP-4bbr_B.pdb
P08518	RPB2_YEAST	YOR151C	18	0	Structure	2e2i	B	94.9	98.4	20	1224	-1	-1	-1	P08518-EXP-2e2i_B.pdb
P08518	RPB2_YEAST	YOR151C	19	0	Structure	3i4m	B	93.4	98.4	20	1224	-1	-1	-1	P08518-EXP-3i4m_B.pdb
P08518	RPB2_YEAST	YOR151C	20	0	Structure	3i4n	B	93.4	98.4	20	1224	-1	-1	-1	P08518-EXP-3i4n_B.pdb
P08518	RPB2_YEAST	YOR151C	21	0	Structure	3fki	B	93.4	98.4	20	1224	-1	-1	-1	P08518-EXP-3fki_B.pdb
P08518	RPB2_YEAST	YOR151C	22	0	Structure	3k7a	B	93.1	98.4	20	1224	-1	-1	-1	P08518-EXP-3k7a_B.pdb
P08518	RPB2_YEAST	YOR151C	23	0	Structure	2yu9	B	93	98.4	20	1224	-1	-1	-1	P08518-EXP-2yu9_B.pdb
P08518	RPB2_YEAST	YOR151C	24	0	Structure	3po2	B	93	98.4	20	1224	-1	-1	-1	P08518-EXP-3po2_B.pdb
P08518	RPB2_YEAST	YOR151C	25	0	Structure	3k1f	B	92.9	98.4	20	1224	-1	-1	-1	P08518-EXP-3k1f_B.pdb
P08518	RPB2_YEAST	YOR151C	26	0	Structure	4a3d	B	92.5	98.4	20	1224	-1	-1	-1	P08518-EXP-4a3d_B.pdb
P08518	RPB2_YEAST	YOR151C	27	0	Structure	4a3j	B	92.5	98.4	20	1224	-1	-1	-1	P08518-EXP-4a3j_B.pdb
P08518	RPB2_YEAST	YOR151C	28	0	Structure	4a3b	B	92.5	98.4	20	1224	-1	-1	-1	P08518-EXP-4a3b_B.pdb
P08518	RPB2_YEAST	YOR151C	29	0	Structure	4a3e	B	92.5	98.4	20	1224	-1	-1	-1	P08518-EXP-4a3e_B.pdb
P08518	RPB2_YEAST	YOR151C	30	0	Structure	4a3c	B	92.5	98.4	20	1224	-1	-1	-1	P08518-EXP-4a3c_B.pdb
P08518	RPB2_YEAST	YOR151C	31	0	Structure	4a3m	B	92.5	98.4	20	1224	-1	-1	-1	P08518-EXP-4a3m_B.pdb
P08518	RPB2_YEAST	YOR151C	32	0	Structure	4a3l	B	92.5	98.4	20	1224	-1	-1	-1	P08518-EXP-4a3l_B.pdb
P08518	RPB2_YEAST	YOR151C	33	0	Structure	4a3g	B	92.5	98.4	20	1224	-1	-1	-1	P08518-EXP-4a3g_B.pdb
P08518	RPB2_YEAST	YOR151C	34	0	Structure	4a3k	B	92.5	98.4	20	1224	-1	-1	-1	P08518-EXP-4a3k_B.pdb
P08518	RPB2_YEAST	YOR151C	35	0	Structure	4a3f	B	92.5	98.4	20	1224	-1	-1	-1	P08518-EXP-4a3f_B.pdb
P08518	RPB2_YEAST	YOR151C	36	0	Structure	4a3i	B	92.5	98.4	20	1224	-1	-1	-1	P08518-EXP-4a3i_B.pdb
P08518	RPB2_YEAST	YOR151C	37	0	Structure	3rzd	B	92.4	98.4	20	1224	-1	-1	-1	P08518-EXP-3rzd_B.pdb
P08518	RPB2_YEAST	YOR151C	38	0	Structure	3hox	B	92.4	98.4	20	1224	-1	-1	-1	P08518-EXP-3hox_B.pdb
P08518	RPB2_YEAST	YOR151C	39	0	Structure	3s1q	B	92.4	98.4	20	1224	-1	-1	-1	P08518-EXP-3s1q_B.pdb
P08518	RPB2_YEAST	YOR151C	40	0	Structure	3s16	B	92.4	98.4	20	1224	-1	-1	-1	P08518-EXP-3s16_B.pdb
P08518	RPB2_YEAST	YOR151C	41	0	Structure	3s15	B	92.4	98.4	20	1224	-1	-1	-1	P08518-EXP-3s15_B.pdb
P08518	RPB2_YEAST	YOR151C	42	0	Structure	3rzo	B	92.4	98.4	20	1224	-1	-1	-1	P08518-EXP-3rzo_B.pdb
P08518	RPB2_YEAST	YOR151C	43	0	Structure	3s1n	B	92.4	98.4	20	1224	-1	-1	-1	P08518-EXP-3s1n_B.pdb
P08518	RPB2_YEAST	YOR151C	44	0	Structure	3s14	B	92.4	98.4	20	1224	-1	-1	-1	P08518-EXP-3s14_B.pdb
P08518	RPB2_YEAST	YOR151C	45	0	Structure	3s1m	B	92.4	98.4	20	1224	-1	-1	-1	P08518-EXP-3s1m_B.pdb
P08518	RPB2_YEAST	YOR151C	46	0	Structure	2nvq	B	92.4	98.4	20	1224	-1	-1	-1	P08518-EXP-2nvq_B.pdb
P08518	RPB2_YEAST	YOR151C	47	0	Structure	2b8k	B	92.4	98.4	20	1224	-1	-1	-1	P08518-EXP-2b8k_B.pdb
P08518	RPB2_YEAST	YOR151C	48	0	Structure	2nvt	B	92.4	98.4	20	1224	-1	-1	-1	P08518-EXP-2nvt_B.pdb
P08518	RPB2_YEAST	YOR151C	49	0	Structure	3s17	B	92.4	98.4	20	1224	-1	-1	-1	P08518-EXP-3s17_B.pdb
P08518	RPB2_YEAST	YOR151C	50	0	Structure	3s2h	B	92.4	98.4	20	1224	-1	-1	-1	P08518-EXP-3s2h_B.pdb
P08518	RPB2_YEAST	YOR151C	51	0	Structure	3s1r	B	92.4	98.4	20	1224	-1	-1	-1	P08518-EXP-3s1r_B.pdb
P08518	RPB2_YEAST	YOR151C	52	0	Structure	3s2d	B	92.4	98.4	20	1224	-1	-1	-1	P08518-EXP-3s2d_B.pdb
P08518	RPB2_YEAST	YOR151C	53	0	Structure	1y1y	B	92.3	98.4	20	1224	-1	-1	-1	P08518-EXP-1y1y_B.pdb
P08518	RPB2_YEAST	YOR151C	54	0	Structure	1y77	B	92.3	98.4	20	1224	-1	-1	-1	P08518-EXP-1y77_B.pdb
P08518	RPB2_YEAST	YOR151C	55	0	Structure	2b63	B	92.3	98.4	20	1224	-1	-1	-1	P08518-EXP-2b63_B.pdb
P08518	RPB2_YEAST	YOR151C	56	0	Structure	3how	B	92.3	98.4	20	1224	-1	-1	-1	P08518-EXP-3how_B.pdb
P08518	RPB2_YEAST	YOR151C	57	0	Structure	1y1w	B	92.3	98.4	20	1224	-1	-1	-1	P08518-EXP-1y1w_B.pdb
P08518	RPB2_YEAST	YOR151C	58	0	Structure	4a93	B	92.3	98.4	20	1224	-1	-1	-1	P08518-EXP-4a93_B.pdb
P08518	RPB2_YEAST	YOR151C	59	0	Structure	1y1v	B	92.3	98.4	20	1224	-1	-1	-1	P08518-EXP-1y1v_B.pdb
P08518	RPB2_YEAST	YOR151C	60	0	Structure	3hoz	B	92	98.4	20	1224	-1	-1	-1	P08518-EXP-3hoz_B.pdb
P08518	RPB2_YEAST	YOR151C	61	0	Structure	3po3	B	92	98.4	20	1224	-1	-1	-1	P08518-EXP-3po3_B.pdb
P08518	RPB2_YEAST	YOR151C	62	0	Structure	3h3v	C	92	98.4	20	1224	-1	-1	-1	P08518-EXP-3h3v_C.pdb
P08518	RPB2_YEAST	YOR151C	63	0	Structure	2r7z	B	92	98.4	20	1224	-1	-1	-1	P08518-EXP-2r7z_B.pdb
P08518	RPB2_YEAST	YOR151C	64	0	Structure	1r9t	B	91.8	98.4	20	1224	-1	-1	-1	P08518-EXP-1r9t_B.pdb
P08518	RPB2_YEAST	YOR151C	65	0	Structure	3gtp	B	91.8	98.4	20	1224	-1	-1	-1	P08518-EXP-3gtp_B.pdb
P08518	RPB2_YEAST	YOR151C	66	0	Structure	3m3y	B	91.8	98.4	20	1224	-1	-1	-1	P08518-EXP-3m3y_B.pdb
P08518	RPB2_YEAST	YOR151C	67	0	Structure	3gtl	B	91.8	98.4	20	1224	-1	-1	-1	P08518-EXP-3gtl_B.pdb
P08518	RPB2_YEAST	YOR151C	68	0	Structure	2vum	B	91.8	98.4	20	1224	-1	-1	-1	P08518-EXP-2vum_B.pdb
P08518	RPB2_YEAST	YOR151C	69	0	Structure	3gtq	B	91.8	98.4	20	1224	-1	-1	-1	P08518-EXP-3gtq_B.pdb
P08518	RPB2_YEAST	YOR151C	70	0	Structure	3gto	B	91.8	98.4	20	1224	-1	-1	-1	P08518-EXP-3gto_B.pdb
P08518	RPB2_YEAST	YOR151C	71	0	Structure	3m4o	B	91.8	98.4	20	1224	-1	-1	-1	P08518-EXP-3m4o_B.pdb
P08518	RPB2_YEAST	YOR151C	72	0	Structure	1sfo	B	91.8	98.4	20	1224	-1	-1	-1	P08518-EXP-1sfo_B.pdb
P08518	RPB2_YEAST	YOR151C	73	0	Structure	3hoy	B	91.7	98.4	20	1224	-1	-1	-1	P08518-EXP-3hoy_B.pdb
P08518	RPB2_YEAST	YOR151C	74	0	Structure	3gtm	B	91.6	98.4	20	1224	-1	-1	-1	P08518-EXP-3gtm_B.pdb
P08518	RPB2_YEAST	YOR151C	75	0	Structure	3hou	N	91.6	98.4	20	1224	-1	-1	-1	P08518-EXP-3hou_N.pdb
P08518	RPB2_YEAST	YOR151C	76	0	Structure	3hou	B	91.6	98.4	20	1224	-1	-1	-1	P08518-EXP-3hou_B.pdb
P08518	RPB2_YEAST	YOR151C	77	0	Structure	3hov	B	91.6	98.4	20	1224	-1	-1	-1	P08518-EXP-3hov_B.pdb
P08518	RPB2_YEAST	YOR151C	78	0	Structure	3qt1	B	91.5	98.4	20	1224	-1	-1	-1	P08518-EXP-3qt1_B.pdb
P08518	RPB2_YEAST	YOR151C	79	0	Structure	1pqv	B	91.5	98.4	20	1224	-1	-1	-1	P08518-EXP-1pqv_B.pdb
P08518	RPB2_YEAST	YOR151C	80	0	Structure	2e2h	B	91	98.4	20	1223	-1	-1	-1	P08518-EXP-2e2h_B.pdb
P08518	RPB2_YEAST	YOR151C	81	0	Structure	1r9s	B	91	98.4	20	1224	-1	-1	-1	P08518-EXP-1r9s_B.pdb
P08518	RPB2_YEAST	YOR151C	82	0	Structure	1i6h	B	91	98.4	20	1224	-1	-1	-1	P08518-EXP-1i6h_B.pdb
P08518	RPB2_YEAST	YOR151C	83	0	Structure	1wcm	B	91	98.4	20	1224	-1	-1	-1	P08518-EXP-1wcm_B.pdb
P08518	RPB2_YEAST	YOR151C	84	0	Structure	2nvz	B	91	98.4	20	1223	-1	-1	-1	P08518-EXP-2nvz_B.pdb
P08518	RPB2_YEAST	YOR151C	85	0	Structure	1nik	B	91	98.4	20	1224	-1	-1	-1	P08518-EXP-1nik_B.pdb
P08518	RPB2_YEAST	YOR151C	86	0	Structure	1r5u	B	91	98.4	20	1224	-1	-1	-1	P08518-EXP-1r5u_B.pdb
P08518	RPB2_YEAST	YOR151C	87	0	Structure	3j1n	B	90.8	98.4	20	1224	-1	-1	-1	P08518-EXP-3j1n_B.pdb
P08518	RPB2_YEAST	YOR151C	88	0	Structure	1nt9	B	90.4	98.4	20	1224	-1	-1	-1	P08518-EXP-1nt9_B.pdb
P08518	RPB2_YEAST	YOR151C	89	0	Structure	1i3q	B	89.9	98.4	20	1224	-1	-1	-1	P08518-EXP-1i3q_B.pdb
P08518	RPB2_YEAST	YOR151C	90	0	Structure	2nvx	B	92.6	98.3	20	1222	-1	-1	-1	P08518-EXP-2nvx_B.pdb
P08518	RPB2_YEAST	YOR151C	91	0	Structure	2e2j	B	91.9	98.3	20	1222	-1	-1	-1	P08518-EXP-2e2j_B.pdb
P08518	RPB2_YEAST	YOR151C	92	0	Structure	3cqz	B	88.3	98.2	20	1221	-1	-1	-1	P08518-EXP-3cqz_B.pdb
P08518	RPB2_YEAST	YOR151C	93	0	Structure	3gtj	B	96	98.1	20	1220	-1	-1	-1	P08518-EXP-3gtj_B.pdb
P08518	RPB2_YEAST	YOR151C	94	0	Structure	3gtk	B	96	98.1	20	1220	-1	-1	-1	P08518-EXP-3gtk_B.pdb
P08518	RPB2_YEAST	YOR151C	95	0	Structure	3gtg	B	96	98.1	20	1220	-1	-1	-1	P08518-EXP-3gtg_B.pdb
P00927	THDH_YEAST	YER086W	1	0	Model	1tdj		50	89.2	61	574	1	0	0	P00927-MDL-P00927.2-1tdj_.pdb
P00927	THDH_YEAST	YER086W	2	0	Model	1tdj		50	89.2	61	574	1	1.51	-0.87	P00927-MDL-P00927.8-1tdj_.pdb
P00927	THDH_YEAST	YER086W	3	0	Model	1tdj	A	50	89.1	62	574	1	1.447	-0.24	P00927-MDL-P00927.4-1tdj_A.pdb
P00927	THDH_YEAST	YER086W	4	0	Model	1tdj	A	49	91.2	51	575	1	1.334	-0.29	P00927-MDL-P00927.10-1tdj_A.pdb
P00927	THDH_YEAST	YER086W	5	0	Model	1tdj		49	89.9	57	574	1	0	0	P00927-MDL-P00927.6-1tdj_.pdb
P16140	VATB_YEAST	YBR127C	1	0	Model	2c61	A	60	87.8	36	489	1	1.631	-1.09	P16140-MDL-P16140.9-2c61_A.pdb
P16140	VATB_YEAST	YBR127C	2	0	Model	2c61	B	59	87.8	36	489	1	1.598	-1.11	P16140-MDL-P16140.5-2c61_B.pdb
P16140	VATB_YEAST	YBR127C	3	0	Model	1fx0	A	31	83	42	470	1	1.15	-0.28	P16140-MDL-P16140.10-1fx0_A.pdb
P16140	VATB_YEAST	YBR127C	4	0	Model	1fx0	A	26	95.2	26	517	1	1.31	-0.64	P16140-MDL-P16140.6-1fx0_A.pdb
P61829	ATP9_YEAST	Q0130	1	0	Structure	2wpd	O	100	100	1	76	-1	-1	-1	P61829-EXP-2wpd_O.pdb
P61829	ATP9_YEAST	Q0130	2	0	Structure	2wpd	P	100	100	1	76	-1	-1	-1	P61829-EXP-2wpd_P.pdb
P61829	ATP9_YEAST	Q0130	3	0	Structure	4b2q	n	100	100	1	76	-1	-1	-1	P61829-EXP-4b2q_n.pdb
P61829	ATP9_YEAST	Q0130	4	0	Structure	4b2q	r	100	100	1	76	-1	-1	-1	P61829-EXP-4b2q_r.pdb
P61829	ATP9_YEAST	Q0130	5	0	Structure	2wpd	R	100	100	1	76	-1	-1	-1	P61829-EXP-2wpd_R.pdb
P61829	ATP9_YEAST	Q0130	6	0	Structure	2wpd	Q	100	100	1	76	-1	-1	-1	P61829-EXP-2wpd_Q.pdb
P61829	ATP9_YEAST	Q0130	7	0	Structure	2wpd	N	100	100	1	76	-1	-1	-1	P61829-EXP-2wpd_N.pdb
P61829	ATP9_YEAST	Q0130	8	0	Structure	4b2q	L	100	100	1	76	-1	-1	-1	P61829-EXP-4b2q_L.pdb
P61829	ATP9_YEAST	Q0130	9	0	Structure	4b2q	s	100	100	1	76	-1	-1	-1	P61829-EXP-4b2q_s.pdb
P61829	ATP9_YEAST	Q0130	10	0	Structure	2wpd	S	100	100	1	76	-1	-1	-1	P61829-EXP-2wpd_S.pdb
P61829	ATP9_YEAST	Q0130	11	0	Structure	4b2q	o	100	100	1	76	-1	-1	-1	P61829-EXP-4b2q_o.pdb
P61829	ATP9_YEAST	Q0130	12	0	Structure	2wpd	J	100	100	1	76	-1	-1	-1	P61829-EXP-2wpd_J.pdb
P61829	ATP9_YEAST	Q0130	13	0	Structure	4b2q	k	100	100	1	76	-1	-1	-1	P61829-EXP-4b2q_k.pdb
P61829	ATP9_YEAST	Q0130	14	0	Structure	4b2q	m	100	100	1	76	-1	-1	-1	P61829-EXP-4b2q_m.pdb
P61829	ATP9_YEAST	Q0130	15	0	Structure	4b2q	M	100	100	1	76	-1	-1	-1	P61829-EXP-4b2q_M.pdb
P61829	ATP9_YEAST	Q0130	16	0	Structure	4b2q	Q	100	100	1	76	-1	-1	-1	P61829-EXP-4b2q_Q.pdb
P61829	ATP9_YEAST	Q0130	17	0	Structure	4b2q	O	100	100	1	76	-1	-1	-1	P61829-EXP-4b2q_O.pdb
P61829	ATP9_YEAST	Q0130	18	0	Structure	4b2q	J	100	100	1	76	-1	-1	-1	P61829-EXP-4b2q_J.pdb
P61829	ATP9_YEAST	Q0130	19	0	Structure	4b2q	P	100	100	1	76	-1	-1	-1	P61829-EXP-4b2q_P.pdb
P61829	ATP9_YEAST	Q0130	20	0	Structure	4b2q	p	100	100	1	76	-1	-1	-1	P61829-EXP-4b2q_p.pdb
P61829	ATP9_YEAST	Q0130	21	0	Structure	2wpd	L	100	100	1	76	-1	-1	-1	P61829-EXP-2wpd_L.pdb
P61829	ATP9_YEAST	Q0130	22	0	Structure	4b2q	R	100	100	1	76	-1	-1	-1	P61829-EXP-4b2q_R.pdb
P61829	ATP9_YEAST	Q0130	23	0	Structure	4b2q	S	100	100	1	76	-1	-1	-1	P61829-EXP-4b2q_S.pdb
P61829	ATP9_YEAST	Q0130	24	0	Structure	4b2q	l	100	100	1	76	-1	-1	-1	P61829-EXP-4b2q_l.pdb
P61829	ATP9_YEAST	Q0130	25	0	Structure	2wpd	K	100	100	1	76	-1	-1	-1	P61829-EXP-2wpd_K.pdb
P61829	ATP9_YEAST	Q0130	26	0	Structure	4b2q	N	100	100	1	76	-1	-1	-1	P61829-EXP-4b2q_N.pdb
P61829	ATP9_YEAST	Q0130	27	0	Structure	2wpd	M	100	100	1	76	-1	-1	-1	P61829-EXP-2wpd_M.pdb
P61829	ATP9_YEAST	Q0130	28	0	Structure	4b2q	K	100	100	1	76	-1	-1	-1	P61829-EXP-4b2q_K.pdb
P61829	ATP9_YEAST	Q0130	29	0	Structure	4b2q	j	100	100	1	76	-1	-1	-1	P61829-EXP-4b2q_j.pdb
P61829	ATP9_YEAST	Q0130	30	0	Structure	4b2q	q	100	100	1	76	-1	-1	-1	P61829-EXP-4b2q_q.pdb
P61829	ATP9_YEAST	Q0130	31	0	Structure	2xok	Q	100	98.7	1	75	-1	-1	-1	P61829-EXP-2xok_Q.pdb
P61829	ATP9_YEAST	Q0130	32	0	Structure	3zry	Q	100	98.7	1	75	-1	-1	-1	P61829-EXP-3zry_Q.pdb
P61829	ATP9_YEAST	Q0130	33	0	Structure	2xok	P	100	98.7	1	75	-1	-1	-1	P61829-EXP-2xok_P.pdb
P61829	ATP9_YEAST	Q0130	34	0	Structure	3zry	P	100	98.7	1	75	-1	-1	-1	P61829-EXP-3zry_P.pdb
P61829	ATP9_YEAST	Q0130	35	0	Structure	3zry	S	100	97.4	1	74	-1	-1	-1	P61829-EXP-3zry_S.pdb
P61829	ATP9_YEAST	Q0130	36	0	Structure	4f4s	O	100	97.4	2	75	-1	-1	-1	P61829-EXP-4f4s_O.pdb
P61829	ATP9_YEAST	Q0130	37	0	Structure	4f4s	M	100	97.4	2	75	-1	-1	-1	P61829-EXP-4f4s_M.pdb
P61829	ATP9_YEAST	Q0130	38	0	Structure	4f4s	N	100	97.4	2	75	-1	-1	-1	P61829-EXP-4f4s_N.pdb
P61829	ATP9_YEAST	Q0130	39	0	Structure	2xok	R	100	97.4	1	74	-1	-1	-1	P61829-EXP-2xok_R.pdb
P61829	ATP9_YEAST	Q0130	40	0	Structure	2xok	S	100	97.4	1	74	-1	-1	-1	P61829-EXP-2xok_S.pdb
P61829	ATP9_YEAST	Q0130	41	0	Structure	4f4s	K	100	97.4	2	75	-1	-1	-1	P61829-EXP-4f4s_K.pdb
P61829	ATP9_YEAST	Q0130	42	0	Structure	3u32	L	100	97.4	2	75	-1	-1	-1	P61829-EXP-3u32_L.pdb
P61829	ATP9_YEAST	Q0130	43	0	Structure	3ud0	M	100	97.4	2	75	-1	-1	-1	P61829-EXP-3ud0_M.pdb
P61829	ATP9_YEAST	Q0130	44	0	Structure	3zry	R	100	97.4	1	74	-1	-1	-1	P61829-EXP-3zry_R.pdb
P61829	ATP9_YEAST	Q0130	45	0	Structure	3u2y	M	100	97.4	2	75	-1	-1	-1	P61829-EXP-3u2y_M.pdb
P61829	ATP9_YEAST	Q0130	46	0	Structure	3zry	O	100	97.4	1	74	-1	-1	-1	P61829-EXP-3zry_O.pdb
P61829	ATP9_YEAST	Q0130	47	0	Structure	3u2y	L	100	97.4	2	75	-1	-1	-1	P61829-EXP-3u2y_L.pdb
P61829	ATP9_YEAST	Q0130	48	0	Structure	4f4s	E	100	97.4	2	75	-1	-1	-1	P61829-EXP-4f4s_E.pdb
P61829	ATP9_YEAST	Q0130	49	0	Structure	3u2y	N	100	97.4	2	75	-1	-1	-1	P61829-EXP-3u2y_N.pdb
P61829	ATP9_YEAST	Q0130	50	0	Structure	4f4s	C	100	97.4	2	75	-1	-1	-1	P61829-EXP-4f4s_C.pdb
P61829	ATP9_YEAST	Q0130	51	0	Structure	2xok	O	100	97.4	1	74	-1	-1	-1	P61829-EXP-2xok_O.pdb
P61829	ATP9_YEAST	Q0130	52	0	Structure	4f4s	L	100	97.4	2	75	-1	-1	-1	P61829-EXP-4f4s_L.pdb
P61829	ATP9_YEAST	Q0130	53	0	Structure	4f4s	D	100	97.4	2	75	-1	-1	-1	P61829-EXP-4f4s_D.pdb
P61829	ATP9_YEAST	Q0130	54	0	Structure	3u32	M	100	97.4	2	75	-1	-1	-1	P61829-EXP-3u32_M.pdb
P61829	ATP9_YEAST	Q0130	55	0	Structure	3u2f	M	100	97.4	2	75	-1	-1	-1	P61829-EXP-3u2f_M.pdb
P61829	ATP9_YEAST	Q0130	56	0	Structure	4f4s	B	100	97.4	2	75	-1	-1	-1	P61829-EXP-4f4s_B.pdb
P61829	ATP9_YEAST	Q0130	57	0	Structure	3u32	O	100	96.1	2	74	-1	-1	-1	P61829-EXP-3u32_O.pdb
P61829	ATP9_YEAST	Q0130	58	0	Structure	4f4s	A	100	96.1	2	74	-1	-1	-1	P61829-EXP-4f4s_A.pdb
P61829	ATP9_YEAST	Q0130	59	0	Structure	2xok	M	100	96.1	1	73	-1	-1	-1	P61829-EXP-2xok_M.pdb
P61829	ATP9_YEAST	Q0130	60	0	Structure	3ud0	L	100	96.1	2	74	-1	-1	-1	P61829-EXP-3ud0_L.pdb
P61829	ATP9_YEAST	Q0130	61	0	Structure	3zry	K	100	96.1	3	75	-1	-1	-1	P61829-EXP-3zry_K.pdb
P61829	ATP9_YEAST	Q0130	62	0	Structure	3u2f	K	100	96.1	2	74	-1	-1	-1	P61829-EXP-3u2f_K.pdb
P61829	ATP9_YEAST	Q0130	63	0	Structure	3u2f	N	100	96.1	2	74	-1	-1	-1	P61829-EXP-3u2f_N.pdb
P61829	ATP9_YEAST	Q0130	64	0	Structure	3zry	J	100	96.1	2	74	-1	-1	-1	P61829-EXP-3zry_J.pdb
P61829	ATP9_YEAST	Q0130	65	0	Structure	3ud0	N	100	96.1	2	74	-1	-1	-1	P61829-EXP-3ud0_N.pdb
P61829	ATP9_YEAST	Q0130	66	0	Structure	3u2f	L	100	96.1	2	74	-1	-1	-1	P61829-EXP-3u2f_L.pdb
P61829	ATP9_YEAST	Q0130	67	0	Structure	2xok	K	100	96.1	3	75	-1	-1	-1	P61829-EXP-2xok_K.pdb
P61829	ATP9_YEAST	Q0130	68	0	Structure	3u2y	K	100	96.1	2	74	-1	-1	-1	P61829-EXP-3u2y_K.pdb
P61829	ATP9_YEAST	Q0130	69	0	Structure	3ud0	O	100	96.1	2	74	-1	-1	-1	P61829-EXP-3ud0_O.pdb
P61829	ATP9_YEAST	Q0130	70	0	Structure	2xok	N	100	96.1	1	73	-1	-1	-1	P61829-EXP-2xok_N.pdb
P61829	ATP9_YEAST	Q0130	71	0	Structure	3u2y	O	100	96.1	2	74	-1	-1	-1	P61829-EXP-3u2y_O.pdb
P61829	ATP9_YEAST	Q0130	72	0	Structure	2xok	T	100	96.1	2	74	-1	-1	-1	P61829-EXP-2xok_T.pdb
P61829	ATP9_YEAST	Q0130	73	0	Structure	3u32	K	100	96.1	2	74	-1	-1	-1	P61829-EXP-3u32_K.pdb
P61829	ATP9_YEAST	Q0130	74	0	Structure	3ud0	K	100	96.1	2	74	-1	-1	-1	P61829-EXP-3ud0_K.pdb
P61829	ATP9_YEAST	Q0130	75	0	Structure	3zry	N	100	96.1	1	73	-1	-1	-1	P61829-EXP-3zry_N.pdb
P61829	ATP9_YEAST	Q0130	76	0	Structure	3u2f	O	100	96.1	2	74	-1	-1	-1	P61829-EXP-3u2f_O.pdb
P61829	ATP9_YEAST	Q0130	77	0	Structure	3zry	M	100	96.1	1	73	-1	-1	-1	P61829-EXP-3zry_M.pdb
P61829	ATP9_YEAST	Q0130	78	0	Structure	3u32	N	100	96.1	2	74	-1	-1	-1	P61829-EXP-3u32_N.pdb
P61829	ATP9_YEAST	Q0130	79	0	Structure	3zry	L	100	94.7	2	73	-1	-1	-1	P61829-EXP-3zry_L.pdb
P61829	ATP9_YEAST	Q0130	80	0	Structure	2xok	L	100	94.7	2	73	-1	-1	-1	P61829-EXP-2xok_L.pdb
P61829	ATP9_YEAST	Q0130	81	0	Model	1wu0	A	34	96.1	1	73	0.21	1.38	-1.12	P61829-MDL-P61829.1-1wu0_A.pdb
P61829	ATP9_YEAST	Q0130	82	0	Model	1yce	A	32	98.7	1	75	0.09	1.179	1.15	P61829-MDL-P61829.7-1yce_A.pdb
P61829	ATP9_YEAST	Q0130	83	0	Model	1yce	A	32	97.4	2	75	0.12	1.43	-1.35	P61829-MDL-P61829.4-1yce_A.pdb
P40513	MAM33_YEAST	YIL070C	1	0	Structure	3qv0	A	82.1	82	49	266	-1	-1	-1	P40513-EXP-3qv0_A.pdb
P20967	ODO1_YEAST	YIL125W	1	0	Model	2jgd	A	44	88.2	116	1009	1	1.337	-0.35	P20967-MDL-P20967.12-2jgd_A.pdb
P20967	ODO1_YEAST	YIL125W	2	0	Model	2jgd	A	43	88.5	116	1012	1	1.34	-0.42	P20967-MDL-P20967.6-2jgd_A.pdb
P20967	ODO1_YEAST	YIL125W	3	0	Model	2jgd	A	41	88.5	116	1012	1	1.303	-0.45	P20967-MDL-P20967.9-2jgd_A.pdb
P39925	AFG3_YEAST	YER017C	1	1	Model	2dhr	A	50	59.4	284	735	1	1.2	-0.46	P39925-MDL-P39925.2-2dhr_A.pdb
P39925	AFG3_YEAST	YER017C	2	1	Model	2dhr	A	50	59.4	284	735	1	1.146	0.11	P39925-MDL-P39925.3-2dhr_A.pdb
P39925	AFG3_YEAST	YER017C	3	1	Model	1ixz	A	59	33.1	282	533	1	0	0	P39925-MDL-P39925.7-1ixz_A.pdb
P36775	LONM_YEAST	YBL022C	1	1	Model	1rre	A	42	16.2	926	1109	1	0	0	P36775-MDL-P36775.8-1rre_A.pdb
P36775	LONM_YEAST	YBL022C	2	1	Model	1rre	A	41	16.2	926	1109	1	0	0	P36775-MDL-P36775.7-1rre_A.pdb
P40341	YTA12_YEAST	YMR089C	1	1	Model	2dhr	A	52	52.7	344	778	1	1.119	0.12	P40341-MDL-P40341.2-2dhr_A.pdb
P40341	YTA12_YEAST	YMR089C	2	1	Model	2dhr	A	50	54.5	341	790	1	1.16	-0.32	P40341-MDL-P40341.7-2dhr_A.pdb
P40341	YTA12_YEAST	YMR089C	3	1	Model	1ixz	A	63	29.6	344	587	1	1.1	-1.33	P40341-MDL-P40341.6-1ixz_A.pdb
P40341	YTA12_YEAST	YMR089C	4	1	Model	1lv7	A	58	31.4	337	595	1	0	0	P40341-MDL-P40341.10-1lv7_A.pdb
P40341	YTA12_YEAST	YMR089C	5	1	Model	1ixz	A	61	29.7	344	588	1	0	0	P40341-MDL-P40341.9-1ixz_A.pdb
Q07540	FRDA_YEAST	YDL120W	1	1	Structure	2ga5	A	99.2	70.7	52	174	-1	-1	-1	Q07540-EXP-2ga5_A.pdb
Q07540	FRDA_YEAST	YDL120W	2	1	Structure	3oeq	A	99.2	69.5	52	172	-1	-1	-1	Q07540-EXP-3oeq_A.pdb
Q07540	FRDA_YEAST	YDL120W	3	1	Structure	3oer	A	99.1	64.4	61	172	-1	-1	-1	Q07540-EXP-3oer_A.pdb
Q07540	FRDA_YEAST	YDL120W	4	1	Structure	4ec2	A	99.1	64.4	61	172	-1	-1	-1	Q07540-EXP-4ec2_A.pdb
Q07540	FRDA_YEAST	YDL120W	5	1	Structure	2fql	A	99.1	64.4	61	172	-1	-1	-1	Q07540-EXP-2fql_A.pdb
Q07540	FRDA_YEAST	YDL120W	6	1	Model	1ekg	A	42	59.2	68	170	1	0	0	Q07540-MDL-Q07540.2-1ekg_A.pdb
Q02784	GLRX5_YEAST	YPL059W	1	1	Structure	3gx8	A	100	74	31	141	-1	-1	-1	Q02784-EXP-3gx8_A.pdb
Q02784	GLRX5_YEAST	YPL059W	2	1	Model	1yka	A	39	79.3	30	148	1	1.317	-0.74	Q02784-MDL-Q02784.2-1yka_A.pdb
Q02784	GLRX5_YEAST	YPL059W	3	1	Model	1yka	A	39	79.3	30	148	1	1.35	-1.08	Q02784-MDL-Q02784.3-1yka_A.pdb
Q02784	GLRX5_YEAST	YPL059W	4	1	Model	1yka	A	36	78	32	148	1	0	0	Q02784-MDL-Q02784.4-1yka_A.pdb
Q02784	GLRX5_YEAST	YPL059W	5	1	Model	1yka	A	36	78	32	148	1	1.332	-1.22	Q02784-MDL-Q02784.8-1yka_A.pdb
Q02784	GLRX5_YEAST	YPL059W	6	1	Model	1wik	A	45	60	45	134	1	1.25	-1.43	Q02784-MDL-Q02784.6-1wik_A.pdb
Q02784	GLRX5_YEAST	YPL059W	7	1	Model	1yka	A	37	64	32	127	1	0	0	Q02784-MDL-Q02784.5-1yka_A.pdb
Q02784	GLRX5_YEAST	YPL059W	8	1	Model	2wci	A	40	0.8	30	146	1	1.588	-1.61	Q02784-MDL-Q02784.11-2wci_A.pdb
P16861	K6PF1_YEAST	YGR240C	1	1	Structure	3o8o	E	96.7	78.8	203	980	-1	-1	-1	P16861-EXP-3o8o_E.pdb
P16861	K6PF1_YEAST	YGR240C	2	1	Structure	3o8o	C	96.6	78.6	205	980	-1	-1	-1	P16861-EXP-3o8o_C.pdb
P16861	K6PF1_YEAST	YGR240C	3	1	Structure	3o8o	A	96.6	78.6	205	980	-1	-1	-1	P16861-EXP-3o8o_A.pdb
P16861	K6PF1_YEAST	YGR240C	4	1	Structure	3o8o	G	96.6	78.2	205	976	-1	-1	-1	P16861-EXP-3o8o_G.pdb
P16861	K6PF1_YEAST	YGR240C	5	1	Model	3pfk		41	36.2	205	561	1	0	0	P16861-MDL-P16861.2-3pfk_.pdb
P16861	K6PF1_YEAST	YGR240C	6	1	Model	1pfk	A	38	35.1	206	551	1	0	0	P16861-MDL-P16861.9-1pfk_A.pdb
P16862	K6PF2_YEAST	YMR205C	1	1	Structure	3o8o	H	100	79.6	195	957	-1	-1	-1	P16862-EXP-3o8o_H.pdb
P16862	K6PF2_YEAST	YMR205C	2	1	Structure	3o8o	B	100	79.6	195	957	-1	-1	-1	P16862-EXP-3o8o_B.pdb
P16862	K6PF2_YEAST	YMR205C	3	1	Structure	3o8o	D	100	79.6	195	957	-1	-1	-1	P16862-EXP-3o8o_D.pdb
P16862	K6PF2_YEAST	YMR205C	4	1	Structure	3o8o	F	100	79.5	196	957	-1	-1	-1	P16862-EXP-3o8o_F.pdb
P16862	K6PF2_YEAST	YMR205C	5	1	Model	3pfk		40	36.5	197	546	1	0	0	P16862-MDL-P16862.7-3pfk_.pdb
P16862	K6PF2_YEAST	YMR205C	6	1	Model	1pfk	A	36	36.6	196	546	1	0	0	P16862-MDL-P16862.8-1pfk_A.pdb
P16862	K6PF2_YEAST	YMR205C	7	1	Model	1pfk	A	36	36.3	197	544	1	0	0	P16862-MDL-P16862.3-1pfk_A.pdb
P54861	DNM1_YEAST	YLL001W	1	1	Model	2aka	B	62	44.7	4	341	1	1.142	-1.22	P54861-MDL-P54861.3-2aka_B.pdb
P54861	DNM1_YEAST	YLL001W	2	1	Model	2aka	B	61	44.7	4	341	1	1.129	-1.24	P54861-MDL-P54861.4-2aka_B.pdb
P54861	DNM1_YEAST	YLL001W	3	1	Model	2aka	B	61	44.7	4	341	1	1.15	-1.41	P54861-MDL-P54861.5-2aka_B.pdb
P54861	DNM1_YEAST	YLL001W	4	1	Model	1jwy	B	59	44.9	5	344	1	0	0	P54861-MDL-P54861.7-1jwy_B.pdb
P54861	DNM1_YEAST	YLL001W	5	1	Model	1jwy	B	59	44.9	5	344	1	0	0	P54861-MDL-P54861.1-1jwy_B.pdb
P20081	FKBP_YEAST	YNL135C	1	0	Structure	1yat	A	100	99.1	2	114	-1	-1	-1	P20081-EXP-1yat_A.pdb
P20081	FKBP_YEAST	YNL135C	2	0	Model	1n1a	A	45	100	1	114	1	1.617	-1.59	P20081-MDL-P20081.3-1n1a_A.pdb
P02293	H2B1_YEAST	YDR224C	1	0	Model	1kx5	D	72	90.8	10	128	1	0	0	P02293-MDL-P02293.11-1kx5_D.pdb
P02293	H2B1_YEAST	YDR224C	2	0	Model	1kx5	D	70	95.4	5	129	1	1.595	-0.22	P02293-MDL-P02293.2-1kx5_D.pdb
P02293	H2B1_YEAST	YDR224C	3	1	Structure	1id3	H	100	72.5	37	131	-1	-1	-1	P02293-EXP-1id3_H.pdb
P02293	H2B1_YEAST	YDR224C	4	1	Structure	2jss	A	100	72.5	37	131	-1	-1	-1	P02293-EXP-2jss_A.pdb
P02293	H2B1_YEAST	YDR224C	5	1	Structure	1id3	D	100	71	37	129	-1	-1	-1	P02293-EXP-1id3_D.pdb
P02293	H2B1_YEAST	YDR224C	6	1	Structure	4jjn	H	100	70.2	38	129	-1	-1	-1	P02293-EXP-4jjn_H.pdb
P02293	H2B1_YEAST	YDR224C	7	1	Model	1eqz	B	81	74.8	31	128	1	0	0	P02293-MDL-P02293.10-1eqz_B.pdb
P02293	H2B1_YEAST	YDR224C	8	1	Model	1eqz	B	81	74.8	31	128	1	0	0	P02293-MDL-P02293.7-1eqz_B.pdb
P02293	H2B1_YEAST	YDR224C	9	1	Model	1tzy	B	82	70.2	37	128	1	0	0	P02293-MDL-P02293.6-1tzy_B.pdb
P02293	H2B1_YEAST	YDR224C	10	1	Model	1tzy	B	82	70.2	37	128	1	1.723	-1.11	P02293-MDL-P02293.1-1tzy_B.pdb
P02293	H2B1_YEAST	YDR224C	11	1	Model	1kx5	D	72	0.9	10	128	1	0	0	P02293-MDL-P02293.13-1kx5_D.pdb
P02293	H2B1_YEAST	YDR224C	12	1	Model	1eqz	B	81	0.8	31	128	1	0	0	P02293-MDL-P02293.14-1eqz_B.pdb
P02294	H2B2_YEAST	YBL002W	1	0	Model	1kx5	D	69	95.4	5	129	1	1.573	-0.17	P02294-MDL-P02294.4-1kx5_D.pdb
P02294	H2B2_YEAST	YBL002W	2	1	Structure	1id3	H	100	73.3	36	131	-1	-1	-1	P02294-EXP-1id3_H.pdb
P02294	H2B2_YEAST	YBL002W	3	1	Model	2jss	A	100	72.5	37	131	1	1.829	-0.16	P02294-MDL-P02294.2-2jss_A.pdb
P02294	H2B2_YEAST	YBL002W	4	1	Structure	4jjn	D	100	72.5	35	129	-1	-1	-1	P02294-EXP-4jjn_D.pdb
P02294	H2B2_YEAST	YBL002W	5	1	Structure	1id3	D	100	71	37	129	-1	-1	-1	P02294-EXP-1id3_D.pdb
P02294	H2B2_YEAST	YBL002W	6	1	Structure	4jjn	H	100	70.2	38	129	-1	-1	-1	P02294-EXP-4jjn_H.pdb
P02294	H2B2_YEAST	YBL002W	7	1	Model	1eqz	B	81	74.8	31	128	1	0	0	P02294-MDL-P02294.6-1eqz_B.pdb
P02294	H2B2_YEAST	YBL002W	8	1	Model	1tzy	B	82	70.2	37	128	1	0	0	P02294-MDL-P02294.5-1tzy_B.pdb
P02294	H2B2_YEAST	YBL002W	9	1	Model	2nqb	D	82	67.2	41	128	1	1.696	-1.21	P02294-MDL-P02294.8-2nqb_D.pdb
P02294	H2B2_YEAST	YBL002W	10	1	Model	1kx5	D	72	0.9	10	128	1	0	0	P02294-MDL-P02294.10-1kx5_D.pdb
P02294	H2B2_YEAST	YBL002W	11	1	Model	1eqz	B	81	0.8	31	128	1	0	0	P02294-MDL-P02294.9-1eqz_B.pdb
P06701	SIR3_YEAST	YLR442C	1	1	Structure	3tu4	K	99.1	21.9	2	215	-1	-1	-1	P06701-EXP-3tu4_K.pdb
P06701	SIR3_YEAST	YLR442C	1	2	Structure	3owt	C	100	2	461	480	-1	-1	-1	P06701-EXP-3owt_C.pdb
P06701	SIR3_YEAST	YLR442C	1	3	Structure	3te6	A	94	32.2	530	844	-1	-1	-1	P06701-EXP-3te6_A.pdb
P06701	SIR3_YEAST	YLR442C	1	4	Structure	3zco	A	100	13	849	975	-1	-1	-1	P06701-EXP-3zco_A.pdb
P06701	SIR3_YEAST	YLR442C	2	1	Structure	3tu4	L	99.5	21.7	2	213	-1	-1	-1	P06701-EXP-3tu4_L.pdb
P06701	SIR3_YEAST	YLR442C	2	2	Structure	3te6	B	93.7	32.2	530	844	-1	-1	-1	P06701-EXP-3te6_B.pdb
P06701	SIR3_YEAST	YLR442C	3	1	Structure	4jjn	L	97.7	22	4	218	-1	-1	-1	P06701-EXP-4jjn_L.pdb
P06701	SIR3_YEAST	YLR442C	4	1	Structure	4jjn	K	97.1	21.4	6	214	-1	-1	-1	P06701-EXP-4jjn_K.pdb
P06701	SIR3_YEAST	YLR442C	5	1	Structure	2fvu	B	88.3	21.8	1	213	-1	-1	-1	P06701-EXP-2fvu_B.pdb
P06701	SIR3_YEAST	YLR442C	6	1	Structure	2fvu	A	87.8	21.8	1	213	-1	-1	-1	P06701-EXP-2fvu_A.pdb
P06701	SIR3_YEAST	YLR442C	7	1	Structure	2fl7	A	88	21.3	8	215	-1	-1	-1	P06701-EXP-2fl7_A.pdb
P06701	SIR3_YEAST	YLR442C	8	1	Model	1m4z	A	50	21.9	1	214	1	0	0	P06701-MDL-P06701.4-1m4z_A.pdb
P06701	SIR3_YEAST	YLR442C	9	1	Model	1m4z	A	50	21.9	1	214	1	0	0	P06701-MDL-P06701.8-1m4z_A.pdb
Q02486	ABF2_YEAST	YMR072W	1	1	Model	2gzk	A	27	76	39	177	1	1.103	-0.55	Q02486-MDL-Q02486.4-2gzk_A.pdb
P27692	SPT5_YEAST	YML010W	1	1	Structure	2exu	A	85.1	10	270	375	-1	-1	-1	P27692-EXP-2exu_A.pdb
P25044	PTP1_YEAST	YDL230W	1	0	Model	2fh7	A	43	83.9	50	330	1	1.126	-0.44	P25044-MDL-P25044.11-2fh7_A.pdb
P25044	PTP1_YEAST	YDL230W	2	0	Model	2fh7	A	43	83.9	50	330	1	1.14	-0.63	P25044-MDL-P25044.30-2fh7_A.pdb
P25044	PTP1_YEAST	YDL230W	3	0	Model	2g59	A	40	83.3	50	328	1	1.157	-0.71	P25044-MDL-P25044.34-2g59_A.pdb
P25044	PTP1_YEAST	YDL230W	4	0	Model	2fh7	A	38	83.9	50	330	1	0	0	P25044-MDL-P25044.18-2fh7_A.pdb
P25044	PTP1_YEAST	YDL230W	5	0	Model	2c7s	A	37	94.3	11	326	1	1.28	-0.7	P25044-MDL-P25044.13-2c7s_A.pdb
P25044	PTP1_YEAST	YDL230W	6	0	Model	2c7s	A	37	94.3	11	326	1	1.274	-0.63	P25044-MDL-P25044.23-2c7s_A.pdb
P25044	PTP1_YEAST	YDL230W	7	0	Model	2hy3	A	37	84.2	46	327	1	0	0	P25044-MDL-P25044.21-2hy3_A.pdb
P25044	PTP1_YEAST	YDL230W	8	0	Model	2i1y	A	37	83.6	52	331	1	1.113	-0.34	P25044-MDL-P25044.22-2i1y_A.pdb
P25044	PTP1_YEAST	YDL230W	9	0	Model	1fpr	A	34	92.5	15	324	1	0	0	P25044-MDL-P25044.26-1fpr_A.pdb
P25044	PTP1_YEAST	YDL230W	10	0	Model	2c7s	A	33	100	1	335	1	1.191	-0.36	P25044-MDL-P25044.31-2c7s_A.pdb
P25044	PTP1_YEAST	YDL230W	11	0	Model	2g59	A	33	96.1	7	328	1	0	0	P25044-MDL-P25044.2-2g59_A.pdb
P25044	PTP1_YEAST	YDL230W	12	0	Model	2fh7	A	33	94.3	14	329	1	1.165	-0.22	P25044-MDL-P25044.27-2fh7_A.pdb
P25044	PTP1_YEAST	YDL230W	13	0	Model	2nv5	A	33	90.2	23	324	1	1.165	-0.63	P25044-MDL-P25044.32-2nv5_A.pdb
P25044	PTP1_YEAST	YDL230W	14	0	Model	2i1y	A	33	85.4	46	331	1	0	0	P25044-MDL-P25044.15-2i1y_A.pdb
P25044	PTP1_YEAST	YDL230W	15	0	Model	1yfo	A	32	97.3	6	331	1	0	0	P25044-MDL-P25044.1-1yfo_A.pdb
P25044	PTP1_YEAST	YDL230W	16	0	Model	1l8k	A	32	92.8	15	325	1	0	0	P25044-MDL-P25044.4-1l8k_A.pdb
P25044	PTP1_YEAST	YDL230W	17	0	Model	1lar	A	31	96.7	12	335	1	0	0	P25044-MDL-P25044.10-1lar_A.pdb
P25044	PTP1_YEAST	YDL230W	18	0	Model	2fh7	A	30	93.7	14	327	1	0	0	P25044-MDL-P25044.5-2fh7_A.pdb
P25044	PTP1_YEAST	YDL230W	19	0	Model	2nv5	A	30	92.8	14	324	1	0	0	P25044-MDL-P25044.19-2nv5_A.pdb
P06780	RHO1_YEAST	YPR165W	1	0	Structure	3a58	F	99.4	86.6	7	187	-1	-1	-1	P06780-EXP-3a58_F.pdb
P06780	RHO1_YEAST	YPR165W	2	0	Structure	3a58	B	99.4	85.2	8	185	-1	-1	-1	P06780-EXP-3a58_B.pdb
P06780	RHO1_YEAST	YPR165W	3	0	Structure	3a58	D	99.4	85.2	8	185	-1	-1	-1	P06780-EXP-3a58_D.pdb
P06780	RHO1_YEAST	YPR165W	4	0	Model	2gcn	A	74	84.7	8	184	1	1.894	-2.18	P06780-MDL-P06780.7-2gcn_A.pdb
P06780	RHO1_YEAST	YPR165W	5	0	Model	1kmq	A	74	84.7	9	185	1	1.88	-2.07	P06780-MDL-P06780.5-1kmq_A.pdb
P06780	RHO1_YEAST	YPR165W	6	0	Model	1kmq	A	74	84.2	9	184	1	1.897	-2.23	P06780-MDL-P06780.1-1kmq_A.pdb
P06780	RHO1_YEAST	YPR165W	7	0	Model	1z2c	A	74	83.7	10	184	1	0	0	P06780-MDL-P06780.9-1z2c_A.pdb
P06780	RHO1_YEAST	YPR165W	8	0	Model	1mh1	A	58	82.8	12	184	1	1.723	-2.26	P06780-MDL-P06780.4-1mh1_A.pdb
P06780	RHO1_YEAST	YPR165W	9	0	Model	2ngr	A	51	96.2	9	209	1	1.421	-1.29	P06780-MDL-P06780.3-2ngr_A.pdb
P06780	RHO1_YEAST	YPR165W	10	0	Model	2ngr	A	51	94.7	12	209	1	0	0	P06780-MDL-P06780.2-2ngr_A.pdb
P12695	ODP2_YEAST	YNL071W	1	1	Model	1fyc		57	19.7	29	123	0.79	0	0	P12695-MDL-P12695.9-1fyc_.pdb
P12695	ODP2_YEAST	YNL071W	1	2	Model	1ebd	C	41	8.1	176	214	1	0	0	P12695-MDL-P12695.19-1ebd_C.pdb
P12695	ODP2_YEAST	YNL071W	1	3	Model	1eaf		30	50	242	482	1	0	0	P12695-MDL-P12695.3-1eaf_.pdb
P12695	ODP2_YEAST	YNL071W	2	1	Model	1fyc		57	19.7	29	123	0.86	0	0	P12695-MDL-P12695.21-1fyc_.pdb
P12695	ODP2_YEAST	YNL071W	2	2	Model	1ebd	C	41	8.1	176	214	1	0	0	P12695-MDL-P12695.22-1ebd_C.pdb
P12695	ODP2_YEAST	YNL071W	2	3	Model	1scz	A	30	48.5	249	482	1	0	0	P12695-MDL-P12695.15-1scz_A.pdb
P12695	ODP2_YEAST	YNL071W	3	1	Model	1fyc		55	20.3	30	127	0.83	0	0	P12695-MDL-P12695.11-1fyc_.pdb
P32473	ODPB_YEAST	YBR221C	1	0	Model	1ni4	B	62	90.2	36	365	1	1.75	-1.89	P32473-MDL-P32473.10-1ni4_B.pdb
P32473	ODPB_YEAST	YBR221C	2	0	Model	1ni4	B	62	90.2	36	365	1	0	0	P32473-MDL-P32473.15-1ni4_B.pdb
P32473	ODPB_YEAST	YBR221C	3	0	Model	3exe	B	62	89.6	38	365	1	1.736	-1.29	P32473-MDL-P32473.1-3exe_B.pdb
P32473	ODPB_YEAST	YBR221C	4	0	Model	1ni4	B	62	89.6	38	365	1	1.8	-1.89	P32473-MDL-P32473.3-1ni4_B.pdb
P32473	ODPB_YEAST	YBR221C	5	0	Model	3exe	B	62	89.3	39	365	1	1.742	-1.35	P32473-MDL-P32473.13-3exe_B.pdb
P32473	ODPB_YEAST	YBR221C	6	0	Model	1ni4	B	62	89.3	39	365	1	0	0	P32473-MDL-P32473.11-1ni4_B.pdb
P32473	ODPB_YEAST	YBR221C	7	0	Model	1qs0	B	39	89.9	35	363	1	0	0	P32473-MDL-P32473.14-1qs0_B.pdb
P32473	ODPB_YEAST	YBR221C	8	0	Model	1x7y	B	35	90.7	33	364	1	0	0	P32473-MDL-P32473.4-1x7y_B.pdb
P32473	ODPB_YEAST	YBR221C	9	0	Model	1v1r	B	34	90.7	33	364	1	0	0	P32473-MDL-P32473.6-1v1r_B.pdb
P32473	ODPB_YEAST	YBR221C	10	0	Model	2o1x	A	24	99.4	3	366	1	1.182	0.33	P32473-MDL-P32473.8-2o1x_A.pdb
P16387	ODPA_YEAST	YER178W	1	0	Model	1ni4	A	53	80.7	64	402	1	0	0	P16387-MDL-P16387.7-1ni4_A.pdb
P16387	ODPA_YEAST	YER178W	2	1	Model	1ni4	A	54	79.5	63	396	1	1.56	-1.31	P16387-MDL-P16387.5-1ni4_A.pdb
P16387	ODPA_YEAST	YER178W	3	1	Model	1ni4	A	55	77.4	69	393	1	0	0	P16387-MDL-P16387.2-1ni4_A.pdb
P16387	ODPA_YEAST	YER178W	4	1	Model	3exe	A	56	74.3	68	379	1	1.495	-0.99	P16387-MDL-P16387.6-3exe_A.pdb
P16387	ODPA_YEAST	YER178W	5	1	Model	1ni4	A	56	74.3	68	379	1	1.55	-1.54	P16387-MDL-P16387.8-1ni4_A.pdb
P32898	CYM1_YEAST	YDR430C	1	0	Model	2fge	A	31	94.5	37	971	1	1.292	-0.35	P32898-MDL-P32898.1-2fge_A.pdb
P32898	CYM1_YEAST	YDR430C	2	0	Model	2fge	A	31	94.5	37	971	1	1.33	-0.74	P32898-MDL-P32898.11-2fge_A.pdb
P32898	CYM1_YEAST	YDR430C	3	0	Model	2fge	A	28	97.2	28	988	1	1.372	-0.83	P32898-MDL-P32898.6-2fge_A.pdb
P32898	CYM1_YEAST	YDR430C	4	0	Model	2fge	A	28	97.2	28	988	1	1.42	-1.26	P32898-MDL-P32898.5-2fge_A.pdb
P54115	ALDH6_YEAST	YPL061W	1	0	Model	1bxs	A	48	95	26	500	1	1.67	-1.53	P54115-MDL-P54115.30-1bxs_A.pdb
P54115	ALDH6_YEAST	YPL061W	2	0	Model	1bxs	A	48	95	26	500	1	1.611	-0.97	P54115-MDL-P54115.9-1bxs_A.pdb
P54115	ALDH6_YEAST	YPL061W	3	0	Model	1o02	A	47	97.6	13	500	1	1.646	-1.11	P54115-MDL-P54115.12-1o02_A.pdb
P54115	ALDH6_YEAST	YPL061W	4	0	Model	1o02	A	47	97.4	14	500	1	1.631	-1.22	P54115-MDL-P54115.21-1o02_A.pdb
P54115	ALDH6_YEAST	YPL061W	5	0	Model	1o9j	A	47	97.4	14	500	1	0	0	P54115-MDL-P54115.18-1o9j_A.pdb
P54115	ALDH6_YEAST	YPL061W	6	0	Model	1bxs	A	47	97	16	500	1	1.68	-1.59	P54115-MDL-P54115.23-1bxs_A.pdb
P54115	ALDH6_YEAST	YPL061W	7	0	Model	1bxs	A	47	95.4	24	500	1	0	0	P54115-MDL-P54115.11-1bxs_A.pdb
P54115	ALDH6_YEAST	YPL061W	8	0	Model	1bi9	A	46	100	1	500	1	1.456	-0.48	P54115-MDL-P54115.16-1bi9_A.pdb
P54115	ALDH6_YEAST	YPL061W	9	0	Model	1bi9	A	46	98.4	9	500	1	0	0	P54115-MDL-P54115.27-1bi9_A.pdb
P54115	ALDH6_YEAST	YPL061W	10	0	Model	1ag8	A	45	97.2	15	500	1	0	0	P54115-MDL-P54115.24-1ag8_A.pdb
P54115	ALDH6_YEAST	YPL061W	11	0	Model	3r31	A	36	95	24	498	1	1.448	-0.85	P54115-MDL-P54115.13-3r31_A.pdb
P54115	ALDH6_YEAST	YPL061W	12	0	Model	3u4j	A	35	96.2	20	500	1	1.494	-0.92	P54115-MDL-P54115.1-3u4j_A.pdb
P54115	ALDH6_YEAST	YPL061W	13	0	Model	3rhd	A	33	90.8	45	498	1	1.377	-0.75	P54115-MDL-P54115.28-3rhd_A.pdb
P54115	ALDH6_YEAST	YPL061W	14	0	Model	3qan	A	32	94.6	24	496	1	1.379	-0.72	P54115-MDL-P54115.25-3qan_A.pdb
P54115	ALDH6_YEAST	YPL061W	15	0	Model	3k2w	A	32	94.2	29	499	1	1.41	-0.7	P54115-MDL-P54115.32-3k2w_A.pdb
P54115	ALDH6_YEAST	YPL061W	16	0	Model	3k2w	A	32	94.2	29	499	1	1.379	-0.67	P54115-MDL-P54115.29-3k2w_A.pdb
P54115	ALDH6_YEAST	YPL061W	17	0	Model	3rhh	A	32	89.8	31	479	1	1.333	-0.61	P54115-MDL-P54115.31-3rhh_A.pdb
P54115	ALDH6_YEAST	YPL061W	18	0	Model	3rjl	A	31	96.6	14	496	1	1.395	-0.73	P54115-MDL-P54115.6-3rjl_A.pdb
P54115	ALDH6_YEAST	YPL061W	19	0	Model	4f3x	A	31	95	24	498	1	1.416	-0.67	P54115-MDL-P54115.22-4f3x_A.pdb
P54115	ALDH6_YEAST	YPL061W	20	0	Model	4dal	A	31	94.8	25	498	1	1.418	-0.75	P54115-MDL-P54115.15-4dal_A.pdb
P54115	ALDH6_YEAST	YPL061W	21	0	Model	3r64	A	31	92.8	24	487	1	1.358	-0.7	P54115-MDL-P54115.3-3r64_A.pdb
P54115	ALDH6_YEAST	YPL061W	22	0	Model	3pqa	A	31	92.2	39	499	1	1.331	-0.62	P54115-MDL-P54115.26-3pqa_A.pdb
P54115	ALDH6_YEAST	YPL061W	23	0	Model	3prl	A	30	95	26	500	1	1.371	-0.83	P54115-MDL-P54115.2-3prl_A.pdb
P54115	ALDH6_YEAST	YPL061W	24	0	Model	4dng	A	28	89	20	464	1	1.275	-0.37	P54115-MDL-P54115.10-4dng_A.pdb
P54115	ALDH6_YEAST	YPL061W	25	0	Model	4e4g	A	27	94.6	27	499	1	1.346	-0.56	P54115-MDL-P54115.5-4e4g_A.pdb
P54115	ALDH6_YEAST	YPL061W	26	0	Model	3ros	A	26	91	42	496	1	1.289	-0.6	P54115-MDL-P54115.7-3ros_A.pdb
P54115	ALDH6_YEAST	YPL061W	27	0	Model	3v4c	A	19	94.8	24	497	1	1.145	0.09	P54115-MDL-P54115.19-3v4c_A.pdb
P54115	ALDH6_YEAST	YPL061W	28	1	Model	1o9j	A	47	1	14	500	1	0	0	P54115-MDL-P54115.35-1o9j_A.pdb
P54115	ALDH6_YEAST	YPL061W	29	1	Model	1bi9	A	46	1	9	500	1	0	0	P54115-MDL-P54115.34-1bi9_A.pdb
P23291	KC11_YEAST	YHR135C	1	1	Model	1csn		67	54.5	63	355	1	1.48	-1.76	P23291-MDL-P23291.8-1csn_.pdb
P23291	KC11_YEAST	YHR135C	2	1	Model	1csn		67	54.3	64	355	1	0	0	P23291-MDL-P23291.1-1csn_.pdb
P23291	KC11_YEAST	YHR135C	3	1	Model	1csn	A	67	54.3	64	355	1	1.418	-1.33	P23291-MDL-P23291.7-1csn_A.pdb
P23291	KC11_YEAST	YHR135C	4	1	Model	1csn	A	67	53.7	64	352	1	1.43	-1.4	P23291-MDL-P23291.4-1csn_A.pdb
P23291	KC11_YEAST	YHR135C	5	1	Model	1cki	A	51	54.8	62	356	1	0	0	P23291-MDL-P23291.5-1cki_A.pdb
P00950	PMG1_YEAST	YKL152C	1	0	Structure	1qhf	B	100	97.2	2	241	-1	-1	-1	P00950-EXP-1qhf_B.pdb
P00950	PMG1_YEAST	YKL152C	2	0	Structure	1qhf	A	100	97.2	2	241	-1	-1	-1	P00950-EXP-1qhf_A.pdb
P00950	PMG1_YEAST	YKL152C	3	0	Structure	4pgm	B	100	95.5	2	237	-1	-1	-1	P00950-EXP-4pgm_B.pdb
P00950	PMG1_YEAST	YKL152C	4	0	Structure	4pgm	D	100	95.5	2	237	-1	-1	-1	P00950-EXP-4pgm_D.pdb
P00950	PMG1_YEAST	YKL152C	5	0	Structure	5pgm	C	100	95.1	2	236	-1	-1	-1	P00950-EXP-5pgm_C.pdb
P00950	PMG1_YEAST	YKL152C	6	0	Structure	1bq4	C	100	95.1	2	236	-1	-1	-1	P00950-EXP-1bq4_C.pdb
P00950	PMG1_YEAST	YKL152C	7	0	Structure	5pgm	F	100	95.1	2	236	-1	-1	-1	P00950-EXP-5pgm_F.pdb
P00950	PMG1_YEAST	YKL152C	8	0	Structure	5pgm	B	100	95.1	2	236	-1	-1	-1	P00950-EXP-5pgm_B.pdb
P00950	PMG1_YEAST	YKL152C	9	0	Structure	4pgm	A	100	95.1	2	236	-1	-1	-1	P00950-EXP-4pgm_A.pdb
P00950	PMG1_YEAST	YKL152C	10	0	Structure	5pgm	D	100	95.1	2	236	-1	-1	-1	P00950-EXP-5pgm_D.pdb
P00950	PMG1_YEAST	YKL152C	11	0	Structure	1bq3	C	100	95.1	2	236	-1	-1	-1	P00950-EXP-1bq3_C.pdb
P00950	PMG1_YEAST	YKL152C	12	0	Structure	1bq4	B	100	95.1	2	236	-1	-1	-1	P00950-EXP-1bq4_B.pdb
P00950	PMG1_YEAST	YKL152C	13	0	Structure	1bq3	B	100	95.1	2	236	-1	-1	-1	P00950-EXP-1bq3_B.pdb
P00950	PMG1_YEAST	YKL152C	14	0	Structure	5pgm	H	100	95.1	2	236	-1	-1	-1	P00950-EXP-5pgm_H.pdb
P00950	PMG1_YEAST	YKL152C	15	0	Structure	5pgm	E	100	94.7	2	235	-1	-1	-1	P00950-EXP-5pgm_E.pdb
P00950	PMG1_YEAST	YKL152C	16	0	Structure	1bq3	A	100	94.7	2	235	-1	-1	-1	P00950-EXP-1bq3_A.pdb
P00950	PMG1_YEAST	YKL152C	17	0	Structure	5pgm	A	100	94.7	2	235	-1	-1	-1	P00950-EXP-5pgm_A.pdb
P00950	PMG1_YEAST	YKL152C	18	0	Structure	1bq4	A	100	94.7	2	235	-1	-1	-1	P00950-EXP-1bq4_A.pdb
P00950	PMG1_YEAST	YKL152C	19	0	Structure	4pgm	C	100	94.7	2	235	-1	-1	-1	P00950-EXP-4pgm_C.pdb
P00950	PMG1_YEAST	YKL152C	20	0	Structure	1bq4	D	100	94.7	2	235	-1	-1	-1	P00950-EXP-1bq4_D.pdb
P00950	PMG1_YEAST	YKL152C	21	0	Structure	5pgm	G	100	94.7	2	235	-1	-1	-1	P00950-EXP-5pgm_G.pdb
P00950	PMG1_YEAST	YKL152C	22	0	Structure	1bq3	D	100	94.7	2	235	-1	-1	-1	P00950-EXP-1bq3_D.pdb
P00950	PMG1_YEAST	YKL152C	23	0	Structure	3pgm	B	94.4	93.9	2	233	-1	-1	-1	P00950-EXP-3pgm_B.pdb
P00950	PMG1_YEAST	YKL152C	24	0	Structure	3pgm	A	94.4	93.9	2	233	-1	-1	-1	P00950-EXP-3pgm_A.pdb
P00950	PMG1_YEAST	YKL152C	25	0	Model	1rii	D	63	92.3	4	231	1	1.789	-1.53	P00950-MDL-P00950.3-1rii_D.pdb
P00950	PMG1_YEAST	YKL152C	26	0	Model	1e58	A	54	99.2	2	246	1	0	0	P00950-MDL-P00950.4-1e58_A.pdb
P00950	PMG1_YEAST	YKL152C	27	0	Model	3gp5	A	53	100	1	247	1	1.527	-1.1	P00950-MDL-P00950.5-3gp5_A.pdb
P00950	PMG1_YEAST	YKL152C	28	1	Model	1e58	A	55	1	3	246	1	0	0	P00950-MDL-P00950.11-1e58_A.pdb
P00950	PMG1_YEAST	YKL152C	29	1	Model	1e58	A	61	0.2	1	56	1	0	0	P00950-MDL-P00950.16-1e58_A.pdb
P34760	TSA1_YEAST	YML028W	1	0	Structure	3sbc	B	99.5	100	1	196	-1	-1	-1	P34760-EXP-3sbc_B.pdb
P34760	TSA1_YEAST	YML028W	2	0	Structure	3sbc	C	99.5	100	1	196	-1	-1	-1	P34760-EXP-3sbc_C.pdb
P34760	TSA1_YEAST	YML028W	3	0	Structure	3sbc	J	99.5	99.5	2	196	-1	-1	-1	P34760-EXP-3sbc_J.pdb
P34760	TSA1_YEAST	YML028W	4	0	Structure	3sbc	E	99.5	99.5	2	196	-1	-1	-1	P34760-EXP-3sbc_E.pdb
P34760	TSA1_YEAST	YML028W	5	0	Structure	3sbc	G	99.5	99.5	2	196	-1	-1	-1	P34760-EXP-3sbc_G.pdb
P34760	TSA1_YEAST	YML028W	6	0	Structure	3sbc	I	99.5	99.5	2	196	-1	-1	-1	P34760-EXP-3sbc_I.pdb
P34760	TSA1_YEAST	YML028W	7	0	Structure	3sbc	H	99.5	99.5	2	196	-1	-1	-1	P34760-EXP-3sbc_H.pdb
P34760	TSA1_YEAST	YML028W	8	0	Structure	3sbc	A	99.5	99.5	2	196	-1	-1	-1	P34760-EXP-3sbc_A.pdb
P34760	TSA1_YEAST	YML028W	9	0	Structure	3sbc	D	99.5	99	2	195	-1	-1	-1	P34760-EXP-3sbc_D.pdb
P34760	TSA1_YEAST	YML028W	10	0	Structure	3sbc	F	99.5	99	2	195	-1	-1	-1	P34760-EXP-3sbc_F.pdb
P34760	TSA1_YEAST	YML028W	11	0	Model	1qmv	A	67	98.5	3	195	1	1.898	-1.51	P34760-MDL-P34760.22-1qmv_A.pdb
P34760	TSA1_YEAST	YML028W	12	0	Model	1qmv	A	67	98.5	3	195	1	0	0	P34760-MDL-P34760.3-1qmv_A.pdb
P34760	TSA1_YEAST	YML028W	13	0	Model	1qmv	A	67	98.5	3	195	1	1.96	-2.11	P34760-MDL-P34760.15-1qmv_A.pdb
P34760	TSA1_YEAST	YML028W	14	0	Model	1qmv	A	65	99	2	195	1	1.834	-1.48	P34760-MDL-P34760.10-1qmv_A.pdb
P34760	TSA1_YEAST	YML028W	15	0	Model	1zye	A	62	81.6	4	163	1	1.702	-1.86	P34760-MDL-P34760.1-1zye_A.pdb
P34760	TSA1_YEAST	YML028W	16	0	Model	3u5r	F	18	97.4	1	191	0.59	1.152	-0.05	P34760-MDL-P34760.8-3u5r_F.pdb
P34760	TSA1_YEAST	YML028W	17	1	Model	1psq	A	27	79.1	4	158	1	1.152	-0.86	P34760-MDL-P34760.16-1psq_A.pdb
P34760	TSA1_YEAST	YML028W	18	1	Model	1qmv	A	66	1	3	195	1	0	0	P34760-MDL-P34760.28-1qmv_A.pdb
P09440	C1TM_YEAST	YBR084W	1	1	Model	1b0a	A	43	30	37	329	1	0	0	P09440-MDL-P09440.15-1b0a_A.pdb
P09440	C1TM_YEAST	YBR084W	1	2	Model	1eg7	A	51	64.3	347	973	1	1.105	-0.04	P09440-MDL-P09440.8-1eg7_A.pdb
P09440	C1TM_YEAST	YBR084W	2	1	Model	1b0a	A	43	30	35	327	1	0	0	P09440-MDL-P09440.1-1b0a_A.pdb
P09440	C1TM_YEAST	YBR084W	2	2	Model	1eg7	A	50	64.3	347	973	1	1.16	-0.73	P09440-MDL-P09440.10-1eg7_A.pdb
P09440	C1TM_YEAST	YBR084W	3	1	Model	1eg7	A	50	64.3	347	973	1	1.113	-0.2	P09440-MDL-P09440.11-1eg7_A.pdb
P09440	C1TM_YEAST	YBR084W	4	1	Model	1eg7	A	50	64.3	347	973	1	0	0	P09440-MDL-P09440.13-1eg7_A.pdb
P09440	C1TM_YEAST	YBR084W	5	1	Model	1eg7	A	50	64.3	347	973	1	0	0	P09440-MDL-P09440.2-1eg7_A.pdb
P24783	DBP2_YEAST	YNL112W	1	1	Model	2db3	A	40	72.7	95	491	1	1.35	-1.56	P24783-MDL-P24783.12-2db3_A.pdb
P24783	DBP2_YEAST	YNL112W	2	1	Model	3fe2	A	67	42.3	90	320	1	1.403	-2.23	P24783-MDL-P24783.11-3fe2_A.pdb
P24783	DBP2_YEAST	YNL112W	3	1	Model	3fe2	A	68	39	90	302	1	1.294	-1.96	P24783-MDL-P24783.1-3fe2_A.pdb
P24783	DBP2_YEAST	YNL112W	3	2	Model	1s2m	A	30	69.8	114	494	1	0	0	P24783-MDL-P24783.9-1s2m_A.pdb
P24783	DBP2_YEAST	YNL112W	4	1	Model	1fuu	B	33	71.1	105	492	1	0	0	P24783-MDL-P24783.3-1fuu_B.pdb
P24783	DBP2_YEAST	YNL112W	5	1	Model	1fuu	B	33	70.7	107	492	1	0	0	P24783-MDL-P24783.7-1fuu_B.pdb
P39730	IF2P_YEAST	YAL035W	1	1	Model	1g7s	A	36	60	402	1002	1	0	0	P39730-MDL-P39730.11-1g7s_A.pdb
P39730	IF2P_YEAST	YAL035W	2	1	Model	1g7s	A	36	60	402	1002	1	0	0	P39730-MDL-P39730.14-1g7s_A.pdb
P39730	IF2P_YEAST	YAL035W	3	1	Model	1g7s	A	37	58.2	401	983	1	1.1	-1.16	P39730-MDL-P39730.17-1g7s_A.pdb
P09624	DLDH_YEAST	YFL018C	1	0	Structure	1v59	B	100	95.8	22	499	-1	-1	-1	P09624-EXP-1v59_B.pdb
P09624	DLDH_YEAST	YFL018C	2	0	Structure	1jeh	A	100	95.8	22	499	-1	-1	-1	P09624-EXP-1jeh_A.pdb
P09624	DLDH_YEAST	YFL018C	3	0	Structure	1v59	A	100	95.8	22	499	-1	-1	-1	P09624-EXP-1v59_A.pdb
P09624	DLDH_YEAST	YFL018C	4	0	Structure	1jeh	B	100	95.8	22	499	-1	-1	-1	P09624-EXP-1jeh_B.pdb
P09624	DLDH_YEAST	YFL018C	5	0	Model	1dxl	A	57	95	25	498	1	0	0	P09624-MDL-P09624.10-1dxl_A.pdb
P09624	DLDH_YEAST	YFL018C	6	0	Model	3urh	A	45	93.6	27	493	1	1.485	-0.14	P09624-MDL-P09624.18-3urh_A.pdb
P09624	DLDH_YEAST	YFL018C	7	0	Model	3l8k	A	29	91.6	27	483	1	1.167	0.32	P09624-MDL-P09624.21-3l8k_A.pdb
P09624	DLDH_YEAST	YFL018C	8	0	Model	3l8k	A	23	94.4	24	494	1	1.173	0.44	P09624-MDL-P09624.2-3l8k_A.pdb
P09624	DLDH_YEAST	YFL018C	9	0	Model	4dna	A	20	93.6	27	493	1	1.117	0.74	P09624-MDL-P09624.28-4dna_A.pdb
P19262	ODO2_YEAST	YDR148C	1	1	Model	1scz	A	58	49.9	232	462	1	1.29	-1.24	P19262-MDL-P19262.9-1scz_A.pdb
P19262	ODO2_YEAST	YDR148C	2	1	Model	1scz	A	58	49.9	232	462	1	0	0	P19262-MDL-P19262.1-1scz_A.pdb
P19262	ODO2_YEAST	YDR148C	3	1	Model	1scz	A	58	49.7	233	462	1	1.242	-0.75	P19262-MDL-P19262.13-1scz_A.pdb
P19262	ODO2_YEAST	YDR148C	4	1	Model	1scz	A	58	49.7	233	462	1	0	0	P19262-MDL-P19262.4-1scz_A.pdb
P19262	ODO2_YEAST	YDR148C	5	1	Model	1b5s	A	36	52	222	462	1	0	0	P19262-MDL-P19262.16-1b5s_A.pdb
P19262	ODO2_YEAST	YDR148C	6	1	Model	1b5s	A	37	50.5	229	462	1	0	0	P19262-MDL-P19262.11-1b5s_A.pdb
P19262	ODO2_YEAST	YDR148C	7	1	Model	1eaf		35	52.3	221	462	1	0	0	P19262-MDL-P19262.6-1eaf_.pdb
P19262	ODO2_YEAST	YDR148C	8	1	Model	1eaf		34	52.3	221	462	1	0	0	P19262-MDL-P19262.17-1eaf_.pdb
Q00711	DHSA_YEAST	YKL148C	1	0	Model	2h88	A	71	93	46	640	1	1.814	-1.13	Q00711-MDL-Q00711.12-2h88_A.pdb
Q00711	DHSA_YEAST	YKL148C	2	0	Model	2h88	A	70	93.3	44	640	1	1.81	-1.42	Q00711-MDL-Q00711.11-2h88_A.pdb
Q00711	DHSA_YEAST	YKL148C	3	0	Model	2h88	A	70	93.1	45	640	1	1.84	-1.44	Q00711-MDL-Q00711.14-2h88_A.pdb
Q00711	DHSA_YEAST	YKL148C	4	0	Model	2h88	A	70	93.1	45	640	1	1.597	-1.16	Q00711-MDL-Q00711.5-2h88_A.pdb
Q00711	DHSA_YEAST	YKL148C	5	0	Model	1zoy	A	69	93.1	45	640	1	0	0	Q00711-MDL-Q00711.7-1zoy_A.pdb
Q00711	DHSA_YEAST	YKL148C	6	0	Model	1nek	A	54	92.7	48	640	1	0	0	Q00711-MDL-Q00711.13-1nek_A.pdb
Q00711	DHSA_YEAST	YKL148C	7	0	Model	1nek	A	54	92.2	51	640	1	0	0	Q00711-MDL-Q00711.15-1nek_A.pdb
Q00711	DHSA_YEAST	YKL148C	8	0	Model	1nek	A	53	92.3	50	640	1	0	0	Q00711-MDL-Q00711.8-1nek_A.pdb
Q00711	DHSA_YEAST	YKL148C	9	0	Model	1l0v	A	41	89.7	52	625	1	0	0	Q00711-MDL-Q00711.17-1l0v_A.pdb
Q00711	DHSA_YEAST	YKL148C	10	0	Model	1qla	A	36	92.3	50	640	1	0	0	Q00711-MDL-Q00711.1-1qla_A.pdb
Q00711	DHSA_YEAST	YKL148C	11	0	Model	1qla	A	36	92.3	50	640	1	0	0	Q00711-MDL-Q00711.2-1qla_A.pdb
P21801	DHSB_YEAST	YLL041C	1	0	Model	2h88	B	75	88.3	30	264	1	1.826	-1	P21801-MDL-P21801.3-2h88_B.pdb
P21801	DHSB_YEAST	YLL041C	2	0	Model	2h88	B	75	88.3	30	264	1	1.81	-0.81	P21801-MDL-P21801.6-2h88_B.pdb
P21801	DHSB_YEAST	YLL041C	3	0	Model	2h88	B	74	88.3	30	264	1	1.672	-1.08	P21801-MDL-P21801.5-2h88_B.pdb
P21801	DHSB_YEAST	YLL041C	4	0	Model	1kf6	B	33	88.3	32	266	1	0	0	P21801-MDL-P21801.8-1kf6_B.pdb
P21801	DHSB_YEAST	YLL041C	5	0	Model	1kf6	B	33	88	32	265	1	0	0	P21801-MDL-P21801.2-1kf6_B.pdb
P21801	DHSB_YEAST	YLL041C	6	0	Model	1kf6	B	29	89.1	29	265	1	1.237	-0.38	P21801-MDL-P21801.1-1kf6_B.pdb
P47052	DHSX_YEAST	YJL045W	1	0	Model	2h88	A	70	94.2	38	634	1	1.797	-1.16	P47052-MDL-P47052.11-2h88_A.pdb
P47052	DHSX_YEAST	YJL045W	2	0	Model	2h88	A	70	94.2	38	634	1	1.82	-1.46	P47052-MDL-P47052.3-2h88_A.pdb
P47052	DHSX_YEAST	YJL045W	3	0	Model	2h88	A	70	94.2	38	634	1	1.623	-1.18	P47052-MDL-P47052.1-2h88_A.pdb
P47052	DHSX_YEAST	YJL045W	4	0	Model	2h88	A	70	94	39	634	1	1.85	-1.49	P47052-MDL-P47052.13-2h88_A.pdb
P47052	DHSX_YEAST	YJL045W	5	0	Model	2h88	A	70	94	39	634	1	1.818	-1.16	P47052-MDL-P47052.9-2h88_A.pdb
P47052	DHSX_YEAST	YJL045W	6	0	Model	1zoy	A	68	94.3	37	634	1	1.758	-0.95	P47052-MDL-P47052.19-1zoy_A.pdb
P47052	DHSX_YEAST	YJL045W	7	0	Model	1zoy	A	68	94.2	38	634	1	0	0	P47052-MDL-P47052.18-1zoy_A.pdb
P47052	DHSX_YEAST	YJL045W	8	0	Model	1nek	A	55	93.1	45	634	1	0	0	P47052-MDL-P47052.15-1nek_A.pdb
P47052	DHSX_YEAST	YJL045W	9	0	Model	1nek	A	54	93.5	42	634	1	0	0	P47052-MDL-P47052.17-1nek_A.pdb
P47052	DHSX_YEAST	YJL045W	10	0	Model	1nek	A	53	93.2	44	634	1	0	0	P47052-MDL-P47052.6-1nek_A.pdb
P47052	DHSX_YEAST	YJL045W	11	0	Model	1l0v	A	41	92.3	46	630	1	0	0	P47052-MDL-P47052.12-1l0v_A.pdb
P47052	DHSX_YEAST	YJL045W	12	0	Model	1qla	A	36	93.2	44	634	1	0	0	P47052-MDL-P47052.14-1qla_A.pdb
P47052	DHSX_YEAST	YJL045W	13	0	Model	1qla	A	36	93.2	44	634	1	0	0	P47052-MDL-P47052.20-1qla_A.pdb
P47052	DHSX_YEAST	YJL045W	14	0	Model	1qla	A	36	93.2	44	634	1	0	0	P47052-MDL-P47052.10-1qla_A.pdb
Q08484	GYP1_YEAST	YOR070C	1	1	Structure	2g77	A	85.1	60.9	246	633	-1	-1	-1	Q08484-EXP-2g77_A.pdb
Q08484	GYP1_YEAST	YOR070C	2	1	Structure	1fkm	A	98.1	41	249	509	-1	-1	-1	Q08484-EXP-1fkm_A.pdb
P07560	SEC4_YEAST	YFL005W	1	0	Structure	3cph	A	100	81.4	20	194	-1	-1	-1	P07560-EXP-3cph_A.pdb
P07560	SEC4_YEAST	YFL005W	2	0	Model	2bcg	Y	47	89.8	15	207	1	1.509	-1.58	P07560-MDL-P07560.9-2bcg_Y.pdb
P07560	SEC4_YEAST	YFL005W	3	0	Model	1ukv	Y	46	93	16	215	1	0	0	P07560-MDL-P07560.11-1ukv_Y.pdb
P07560	SEC4_YEAST	YFL005W	4	1	Structure	2eqb	A	100	78.6	19	187	-1	-1	-1	P07560-EXP-2eqb_A.pdb
P07560	SEC4_YEAST	YFL005W	5	1	Structure	1g17	A	98.8	78.1	19	186	-1	-1	-1	P07560-EXP-1g17_A.pdb
P07560	SEC4_YEAST	YFL005W	6	1	Structure	1g17	B	98.8	78.1	19	186	-1	-1	-1	P07560-EXP-1g17_B.pdb
P07560	SEC4_YEAST	YFL005W	7	1	Structure	1g16	C	97	77.7	19	185	-1	-1	-1	P07560-EXP-1g16_C.pdb
P07560	SEC4_YEAST	YFL005W	8	1	Structure	1g16	B	92.9	78.1	19	186	-1	-1	-1	P07560-EXP-1g16_B.pdb
P07560	SEC4_YEAST	YFL005W	9	1	Structure	1g16	D	92.8	77.7	20	186	-1	-1	-1	P07560-EXP-1g16_D.pdb
P07560	SEC4_YEAST	YFL005W	10	1	Structure	1g16	A	92.8	77.2	19	184	-1	-1	-1	P07560-EXP-1g16_A.pdb
P07560	SEC4_YEAST	YFL005W	11	1	Structure	2ocy	C	85.8	78.6	18	186	-1	-1	-1	P07560-EXP-2ocy_C.pdb
P38555	YPT31_YEAST	YER031C	1	0	Model	1a2k	E	25	91.5	11	214	1	1.261	-1.02	P38555-MDL-P38555.6-1a2k_E.pdb
P38555	YPT31_YEAST	YER031C	2	1	Structure	3cpj	B	93.5	75.8	10	178	-1	-1	-1	P38555-EXP-3cpj_B.pdb
P38555	YPT31_YEAST	YER031C	3	1	Model	2f9l	A	70	78	10	183	1	1.77	-2.04	P38555-MDL-P38555.15-2f9l_A.pdb
P38555	YPT31_YEAST	YER031C	4	1	Model	1oix	A	71	74.9	9	175	1	1.74	-1.95	P38555-MDL-P38555.18-1oix_A.pdb
P38555	YPT31_YEAST	YER031C	5	1	Model	1oiv	A	71	74.9	9	175	1	0	0	P38555-MDL-P38555.17-1oiv_A.pdb
P38555	YPT31_YEAST	YER031C	6	1	Model	2oil	A	62	77.1	9	180	1	1.684	-2.02	P38555-MDL-P38555.9-2oil_A.pdb
P38555	YPT31_YEAST	YER031C	7	1	Model	1ukv	Y	48	79.4	8	184	1	0	0	P38555-MDL-P38555.11-1ukv_Y.pdb
P38555	YPT31_YEAST	YER031C	8	1	Model	2bme	A	48	78	9	182	1	0	0	P38555-MDL-P38555.19-2bme_A.pdb
P38555	YPT31_YEAST	YER031C	9	1	Model	1i2m	A	30	76.2	13	182	1	0	0	P38555-MDL-P38555.5-1i2m_A.pdb
P38555	YPT31_YEAST	YER031C	10	1	Model	2x19	A	31	73.1	14	176	1	1.232	-1.1	P38555-MDL-P38555.7-2x19_A.pdb
P38555	YPT31_YEAST	YER031C	11	1	Model	1ftn	A	29	73.1	14	176	1	1.146	-1.11	P38555-MDL-P38555.10-1ftn_A.pdb
P32657	CHD1_YEAST	YER164W	1	1	Structure	3mwy	W	93	51	175	922	-1	-1	-1	P32657-EXP-3mwy_W.pdb
P32657	CHD1_YEAST	YER164W	1	2	Structure	3ted	A	87.7	17.8	1006	1266	-1	-1	-1	P32657-EXP-3ted_A.pdb
P32657	CHD1_YEAST	YER164W	2	1	Structure	2h1e	A	100	11.2	175	339	-1	-1	-1	P32657-EXP-2h1e_A.pdb
P32657	CHD1_YEAST	YER164W	2	2	Structure	2xb0	X	87.1	17.9	1007	1269	-1	-1	-1	P32657-EXP-2xb0_X.pdb
P32657	CHD1_YEAST	YER164W	3	1	Structure	2h1e	B	100	11.1	177	339	-1	-1	-1	P32657-EXP-2h1e_B.pdb
P32657	CHD1_YEAST	YER164W	4	1	Structure	2dy7	A	100	5.5	172	252	-1	-1	-1	P32657-EXP-2dy7_A.pdb
P32657	CHD1_YEAST	YER164W	4	2	Structure	2dy8	A	100	4.7	279	347	-1	-1	-1	P32657-EXP-2dy8_A.pdb
P35177	SPT7_YEAST	YBR081C	1	1	Model	1e6i	A	33	7.6	448	548	1	0	0	P35177-MDL-P35177.5-1e6i_A.pdb
P36130	CAF4_YEAST	YKR036C	1	1	Structure	2pqr	D	100	7	78	122	-1	-1	-1	P36130-EXP-2pqr_D.pdb
P36130	CAF4_YEAST	YKR036C	2	1	Structure	2pqr	C	90.9	6.8	81	124	-1	-1	-1	P36130-EXP-2pqr_C.pdb
P40515	FIS1_YEAST	YIL065C	1	0	Structure	1y8m	A	100	89	1	138	-1	-1	-1	P40515-EXP-1y8m_A.pdb
P40515	FIS1_YEAST	YIL065C	2	0	Structure	3uux	A	100	81.9	3	129	-1	-1	-1	P40515-EXP-3uux_A.pdb
P40515	FIS1_YEAST	YIL065C	3	0	Structure	2pqn	A	100	81.3	4	129	-1	-1	-1	P40515-EXP-2pqn_A.pdb
P40515	FIS1_YEAST	YIL065C	4	0	Structure	3uux	C	100	80.6	3	127	-1	-1	-1	P40515-EXP-3uux_C.pdb
P40515	FIS1_YEAST	YIL065C	5	0	Structure	2pqr	B	100	80	5	128	-1	-1	-1	P40515-EXP-2pqr_B.pdb
P40515	FIS1_YEAST	YIL065C	6	1	Structure	3o48	A	100	79.4	5	127	-1	-1	-1	P40515-EXP-3o48_A.pdb
P40515	FIS1_YEAST	YIL065C	7	1	Structure	2pqr	A	100	63.2	5	102	-1	-1	-1	P40515-EXP-2pqr_A.pdb
P47025	MDV1_YEAST	YJL112W	1	1	Structure	3uux	D	63	29.1	94	301	-1	-1	-1	P47025-EXP-3uux_D.pdb
P47025	MDV1_YEAST	YJL112W	2	1	Structure	3uux	B	62.8	29	94	300	-1	-1	-1	P47025-EXP-3uux_B.pdb
P47025	MDV1_YEAST	YJL112W	3	1	Structure	2pqn	B	100	2.8	145	164	-1	-1	-1	P47025-EXP-2pqn_B.pdb
P47025	MDV1_YEAST	YJL112W	3	2	Structure	2xu6	B	96.8	8.7	231	292	-1	-1	-1	P47025-EXP-2xu6_B.pdb
P47025	MDV1_YEAST	YJL112W	4	1	Structure	2xu6	A	96.7	8.5	231	291	-1	-1	-1	P47025-EXP-2xu6_A.pdb
P04807	HXKB_YEAST	YGL253W	1	0	Structure	1ig8	A	100	96.5	18	486	-1	-1	-1	P04807-EXP-1ig8_A.pdb
P04807	HXKB_YEAST	YGL253W	2	0	Structure	2yhx	A	34.6	91.6	27	471	-1	-1	-1	P04807-EXP-2yhx_A.pdb
P04807	HXKB_YEAST	YGL253W	3	0	Model	1bg3	A	36	97.3	1	473	1	1.425	-0.87	P04807-MDL-P04807.5-1bg3_A.pdb
P04807	HXKB_YEAST	YGL253W	4	0	Model	1bg3	A	35	97.1	2	473	1	0	0	P04807-MDL-P04807.6-1bg3_A.pdb
P04807	HXKB_YEAST	YGL253W	5	1	Model	1bg3	A	35	1	2	473	1	0	0	P04807-MDL-P04807.7-1bg3_A.pdb
P06782	SNF1_YEAST	YDR477W	1	1	Model	2eue	A	98	42.2	49	315	1	1.5	-1.56	P06782-MDL-P06782.13-2eue_A.pdb
P06782	SNF1_YEAST	YDR477W	1	2	Structure	3tdh	A	83.7	26.2	465	630	-1	-1	-1	P06782-EXP-3tdh_A.pdb
P06782	SNF1_YEAST	YDR477W	2	1	Structure	2fh9	A	93.1	43.3	46	319	-1	-1	-1	P06782-EXP-2fh9_A.pdb
P06782	SNF1_YEAST	YDR477W	2	2	Structure	3t4n	A	83.7	26.2	465	630	-1	-1	-1	P06782-EXP-3t4n_A.pdb
P06782	SNF1_YEAST	YDR477W	3	1	Structure	3mn3	A	93	42.8	50	320	-1	-1	-1	P06782-EXP-3mn3_A.pdb
P06782	SNF1_YEAST	YDR477W	3	2	Structure	3te5	A	82.6	26.4	464	630	-1	-1	-1	P06782-EXP-3te5_A.pdb
P06782	SNF1_YEAST	YDR477W	4	1	Structure	3dae	A	92.5	42.3	48	315	-1	-1	-1	P06782-EXP-3dae_A.pdb
P06782	SNF1_YEAST	YDR477W	4	2	Structure	2qlv	A	77.8	27	460	630	-1	-1	-1	P06782-EXP-2qlv_A.pdb
P06782	SNF1_YEAST	YDR477W	5	1	Structure	3dae	B	92.5	42	50	315	-1	-1	-1	P06782-EXP-3dae_B.pdb
P06782	SNF1_YEAST	YDR477W	5	2	Structure	2qlv	D	77.8	27	460	630	-1	-1	-1	P06782-EXP-2qlv_D.pdb
P06782	SNF1_YEAST	YDR477W	6	1	Structure	3hyh	A	90.8	41.4	54	315	-1	-1	-1	P06782-EXP-3hyh_A.pdb
P06782	SNF1_YEAST	YDR477W	7	1	Structure	3hyh	B	88.9	41.4	54	315	-1	-1	-1	P06782-EXP-3hyh_B.pdb
P06782	SNF1_YEAST	YDR477W	8	1	Model	1o6l	A	35	46.6	52	346	1	0	0	P06782-MDL-P06782.3-1o6l_A.pdb
P06782	SNF1_YEAST	YDR477W	9	1	Model	1o6l	A	32	49	49	358	1	0	0	P06782-MDL-P06782.5-1o6l_A.pdb
P06782	SNF1_YEAST	YDR477W	10	1	Model	3cok	A	38	40.3	52	306	1	0	0	P06782-MDL-P06782.21-3cok_A.pdb
P21243	PSA1_YEAST	YGL011C	1	0	Structure	1vsy	A	100	96.4	10	252	-1	-1	-1	P21243-EXP-1vsy_A.pdb
P21243	PSA1_YEAST	YGL011C	2	0	Structure	3e47	G	100	96.4	10	252	-1	-1	-1	P21243-EXP-3e47_G.pdb
P21243	PSA1_YEAST	YGL011C	3	0	Structure	3mg0	U	100	96.4	10	252	-1	-1	-1	P21243-EXP-3mg0_U.pdb
P21243	PSA1_YEAST	YGL011C	4	0	Structure	2gpl	G	100	96.4	10	252	-1	-1	-1	P21243-EXP-2gpl_G.pdb
P21243	PSA1_YEAST	YGL011C	5	0	Structure	4fzg	U	100	96.4	10	252	-1	-1	-1	P21243-EXP-4fzg_U.pdb
P21243	PSA1_YEAST	YGL011C	6	0	Structure	3bdm	G	100	96.4	10	252	-1	-1	-1	P21243-EXP-3bdm_G.pdb
P21243	PSA1_YEAST	YGL011C	7	0	Structure	3nzj	G	100	96.4	10	252	-1	-1	-1	P21243-EXP-3nzj_G.pdb
P21243	PSA1_YEAST	YGL011C	8	0	Structure	3dy3	G	100	96.4	10	252	-1	-1	-1	P21243-EXP-3dy3_G.pdb
P21243	PSA1_YEAST	YGL011C	9	0	Structure	3e47	U	100	96.4	10	252	-1	-1	-1	P21243-EXP-3e47_U.pdb
P21243	PSA1_YEAST	YGL011C	10	0	Structure	3mg8	U	100	96.4	10	252	-1	-1	-1	P21243-EXP-3mg8_U.pdb
P21243	PSA1_YEAST	YGL011C	11	0	Structure	4jt0	U	100	96.4	10	252	-1	-1	-1	P21243-EXP-4jt0_U.pdb
P21243	PSA1_YEAST	YGL011C	12	0	Structure	3oeu	U	100	96.4	10	252	-1	-1	-1	P21243-EXP-3oeu_U.pdb
P21243	PSA1_YEAST	YGL011C	13	0	Structure	3un4	G	100	96.4	10	252	-1	-1	-1	P21243-EXP-3un4_G.pdb
P21243	PSA1_YEAST	YGL011C	14	0	Structure	2zcy	U	100	96.4	10	252	-1	-1	-1	P21243-EXP-2zcy_U.pdb
P21243	PSA1_YEAST	YGL011C	15	0	Structure	4j70	U	100	96.4	10	252	-1	-1	-1	P21243-EXP-4j70_U.pdb
P21243	PSA1_YEAST	YGL011C	16	0	Structure	3okj	G	100	96.4	10	252	-1	-1	-1	P21243-EXP-3okj_G.pdb
P21243	PSA1_YEAST	YGL011C	17	0	Structure	3dy4	U	100	96.4	10	252	-1	-1	-1	P21243-EXP-3dy4_U.pdb
P21243	PSA1_YEAST	YGL011C	18	0	Structure	3gpj	G	100	96.4	10	252	-1	-1	-1	P21243-EXP-3gpj_G.pdb
P21243	PSA1_YEAST	YGL011C	19	0	Structure	4int	G	100	96.4	10	252	-1	-1	-1	P21243-EXP-4int_G.pdb
P21243	PSA1_YEAST	YGL011C	20	0	Structure	3mg4	G	100	96.4	10	252	-1	-1	-1	P21243-EXP-3mg4_G.pdb
P21243	PSA1_YEAST	YGL011C	21	0	Structure	2zcy	G	100	96.4	10	252	-1	-1	-1	P21243-EXP-2zcy_G.pdb
P21243	PSA1_YEAST	YGL011C	22	0	Structure	4inr	G	100	96.4	10	252	-1	-1	-1	P21243-EXP-4inr_G.pdb
P21243	PSA1_YEAST	YGL011C	23	0	Structure	3sdk	U	100	96.4	10	252	-1	-1	-1	P21243-EXP-3sdk_U.pdb
P21243	PSA1_YEAST	YGL011C	24	0	Structure	3shj	G	100	96.4	10	252	-1	-1	-1	P21243-EXP-3shj_G.pdb
P21243	PSA1_YEAST	YGL011C	25	0	Structure	3mg6	G	100	96.4	10	252	-1	-1	-1	P21243-EXP-3mg6_G.pdb
P21243	PSA1_YEAST	YGL011C	26	0	Structure	3mg6	U	100	96.4	10	252	-1	-1	-1	P21243-EXP-3mg6_U.pdb
P21243	PSA1_YEAST	YGL011C	27	0	Structure	3hye	U	100	96.4	10	252	-1	-1	-1	P21243-EXP-3hye_U.pdb
P21243	PSA1_YEAST	YGL011C	28	0	Structure	3gpt	G	100	96.4	10	252	-1	-1	-1	P21243-EXP-3gpt_G.pdb
P21243	PSA1_YEAST	YGL011C	29	0	Structure	4gk7	U	100	96.4	10	252	-1	-1	-1	P21243-EXP-4gk7_U.pdb
P21243	PSA1_YEAST	YGL011C	30	0	Structure	3mg0	G	100	96.4	10	252	-1	-1	-1	P21243-EXP-3mg0_G.pdb
P21243	PSA1_YEAST	YGL011C	31	0	Structure	4gk7	G	100	96.4	10	252	-1	-1	-1	P21243-EXP-4gk7_G.pdb
P21243	PSA1_YEAST	YGL011C	32	0	Structure	4inu	G	100	96.4	10	252	-1	-1	-1	P21243-EXP-4inu_G.pdb
P21243	PSA1_YEAST	YGL011C	33	0	Structure	3tdd	U	100	96.4	10	252	-1	-1	-1	P21243-EXP-3tdd_U.pdb
P21243	PSA1_YEAST	YGL011C	34	0	Structure	3dy3	U	100	96.4	10	252	-1	-1	-1	P21243-EXP-3dy3_U.pdb
P21243	PSA1_YEAST	YGL011C	35	0	Structure	4jsq	G	100	96.4	10	252	-1	-1	-1	P21243-EXP-4jsq_G.pdb
P21243	PSA1_YEAST	YGL011C	36	0	Structure	3nzx	G	100	96.4	10	252	-1	-1	-1	P21243-EXP-3nzx_G.pdb
P21243	PSA1_YEAST	YGL011C	37	0	Structure	1jd2	G	100	96.4	10	252	-1	-1	-1	P21243-EXP-1jd2_G.pdb
P21243	PSA1_YEAST	YGL011C	38	0	Structure	1ryp	A	100	96.4	10	252	-1	-1	-1	P21243-EXP-1ryp_A.pdb
P21243	PSA1_YEAST	YGL011C	39	0	Structure	4jt0	G	100	96.4	10	252	-1	-1	-1	P21243-EXP-4jt0_G.pdb
P21243	PSA1_YEAST	YGL011C	40	0	Structure	3mg8	G	100	96.4	10	252	-1	-1	-1	P21243-EXP-3mg8_G.pdb
P21243	PSA1_YEAST	YGL011C	41	0	Structure	3tdd	G	100	96.4	10	252	-1	-1	-1	P21243-EXP-3tdd_G.pdb
P21243	PSA1_YEAST	YGL011C	42	0	Structure	1g65	U	100	96.4	10	252	-1	-1	-1	P21243-EXP-1g65_U.pdb
P21243	PSA1_YEAST	YGL011C	43	0	Structure	3gpw	G	100	96.4	10	252	-1	-1	-1	P21243-EXP-3gpw_G.pdb
P21243	PSA1_YEAST	YGL011C	44	0	Structure	3d29	U	100	96.4	10	252	-1	-1	-1	P21243-EXP-3d29_U.pdb
P21243	PSA1_YEAST	YGL011C	45	0	Structure	3nzj	U	100	96.4	10	252	-1	-1	-1	P21243-EXP-3nzj_U.pdb
P21243	PSA1_YEAST	YGL011C	46	0	Structure	2f16	G	100	96.4	10	252	-1	-1	-1	P21243-EXP-2f16_G.pdb
P21243	PSA1_YEAST	YGL011C	47	0	Structure	2gpl	U	100	96.4	10	252	-1	-1	-1	P21243-EXP-2gpl_U.pdb
P21243	PSA1_YEAST	YGL011C	48	0	Structure	3l5q	A	100	96.4	10	252	-1	-1	-1	P21243-EXP-3l5q_A.pdb
P21243	PSA1_YEAST	YGL011C	49	0	Structure	4jsu	U	100	96.4	10	252	-1	-1	-1	P21243-EXP-4jsu_U.pdb
P21243	PSA1_YEAST	YGL011C	50	0	Structure	3un8	U	100	96.4	10	252	-1	-1	-1	P21243-EXP-3un8_U.pdb
P21243	PSA1_YEAST	YGL011C	51	0	Structure	1z7q	O	100	96.4	10	252	-1	-1	-1	P21243-EXP-1z7q_O.pdb
P21243	PSA1_YEAST	YGL011C	52	0	Structure	1jd2	2	100	96.4	10	252	-1	-1	-1	P21243-EXP-1jd2_2.pdb
P21243	PSA1_YEAST	YGL011C	53	0	Structure	3bdm	U	100	96.4	10	252	-1	-1	-1	P21243-EXP-3bdm_U.pdb
P21243	PSA1_YEAST	YGL011C	54	0	Structure	4int	U	100	96.4	10	252	-1	-1	-1	P21243-EXP-4int_U.pdb
P21243	PSA1_YEAST	YGL011C	55	0	Structure	4inu	U	100	96.4	10	252	-1	-1	-1	P21243-EXP-4inu_U.pdb
P21243	PSA1_YEAST	YGL011C	56	0	Structure	3nzw	U	100	96.4	10	252	-1	-1	-1	P21243-EXP-3nzw_U.pdb
P21243	PSA1_YEAST	YGL011C	57	0	Structure	4jsq	U	100	96.4	10	252	-1	-1	-1	P21243-EXP-4jsq_U.pdb
P21243	PSA1_YEAST	YGL011C	58	0	Structure	4j70	G	100	96.4	10	252	-1	-1	-1	P21243-EXP-4j70_G.pdb
P21243	PSA1_YEAST	YGL011C	59	0	Structure	2f16	U	100	96.4	10	252	-1	-1	-1	P21243-EXP-2f16_U.pdb
P21243	PSA1_YEAST	YGL011C	60	0	Structure	4jsu	G	100	96.4	10	252	-1	-1	-1	P21243-EXP-4jsu_G.pdb
P21243	PSA1_YEAST	YGL011C	61	0	Structure	3nzw	G	100	96.4	10	252	-1	-1	-1	P21243-EXP-3nzw_G.pdb
P21243	PSA1_YEAST	YGL011C	62	0	Structure	2fak	U	100	96.4	10	252	-1	-1	-1	P21243-EXP-2fak_U.pdb
P21243	PSA1_YEAST	YGL011C	63	0	Structure	3oev	G	100	96.4	10	252	-1	-1	-1	P21243-EXP-3oev_G.pdb
P21243	PSA1_YEAST	YGL011C	64	0	Structure	3gpt	U	100	96.4	10	252	-1	-1	-1	P21243-EXP-3gpt_U.pdb
P21243	PSA1_YEAST	YGL011C	65	0	Structure	3l5q	C	100	96.4	10	252	-1	-1	-1	P21243-EXP-3l5q_C.pdb
P21243	PSA1_YEAST	YGL011C	66	0	Structure	3dy4	G	100	96.4	10	252	-1	-1	-1	P21243-EXP-3dy4_G.pdb
P21243	PSA1_YEAST	YGL011C	67	0	Structure	3gpj	U	100	96.4	10	252	-1	-1	-1	P21243-EXP-3gpj_U.pdb
P21243	PSA1_YEAST	YGL011C	68	0	Structure	3oeu	G	100	96.4	10	252	-1	-1	-1	P21243-EXP-3oeu_G.pdb
P21243	PSA1_YEAST	YGL011C	69	0	Structure	1ryp	O	100	96.4	10	252	-1	-1	-1	P21243-EXP-1ryp_O.pdb
P21243	PSA1_YEAST	YGL011C	70	0	Structure	3shj	U	100	96.4	10	252	-1	-1	-1	P21243-EXP-3shj_U.pdb
P21243	PSA1_YEAST	YGL011C	71	0	Structure	4b4t	A	100	96.4	10	252	-1	-1	-1	P21243-EXP-4b4t_A.pdb
P21243	PSA1_YEAST	YGL011C	72	0	Structure	2fak	G	100	96.4	10	252	-1	-1	-1	P21243-EXP-2fak_G.pdb
P21243	PSA1_YEAST	YGL011C	73	0	Structure	1vsy	O	100	96.4	10	252	-1	-1	-1	P21243-EXP-1vsy_O.pdb
P21243	PSA1_YEAST	YGL011C	74	0	Structure	4inr	U	100	96.4	10	252	-1	-1	-1	P21243-EXP-4inr_U.pdb
P21243	PSA1_YEAST	YGL011C	75	0	Structure	4fzg	G	100	96.4	10	252	-1	-1	-1	P21243-EXP-4fzg_G.pdb
P21243	PSA1_YEAST	YGL011C	76	0	Structure	1g65	G	100	96.4	10	252	-1	-1	-1	P21243-EXP-1g65_G.pdb
P21243	PSA1_YEAST	YGL011C	77	0	Structure	3mg7	G	100	96.4	10	252	-1	-1	-1	P21243-EXP-3mg7_G.pdb
P21243	PSA1_YEAST	YGL011C	78	0	Structure	3un4	U	100	96.4	10	252	-1	-1	-1	P21243-EXP-3un4_U.pdb
P21243	PSA1_YEAST	YGL011C	79	0	Structure	3nzx	U	100	96.4	10	252	-1	-1	-1	P21243-EXP-3nzx_U.pdb
P21243	PSA1_YEAST	YGL011C	80	0	Structure	3mg4	U	100	96.4	10	252	-1	-1	-1	P21243-EXP-3mg4_U.pdb
P21243	PSA1_YEAST	YGL011C	81	0	Structure	3hye	G	100	96.4	10	252	-1	-1	-1	P21243-EXP-3hye_G.pdb
P21243	PSA1_YEAST	YGL011C	82	0	Structure	3sdk	G	100	96.4	10	252	-1	-1	-1	P21243-EXP-3sdk_G.pdb
P21243	PSA1_YEAST	YGL011C	83	0	Structure	3gpw	U	100	96.4	10	252	-1	-1	-1	P21243-EXP-3gpw_U.pdb
P21243	PSA1_YEAST	YGL011C	84	0	Structure	3d29	G	100	96.4	10	252	-1	-1	-1	P21243-EXP-3d29_G.pdb
P21243	PSA1_YEAST	YGL011C	85	0	Structure	3okj	U	100	96.4	10	252	-1	-1	-1	P21243-EXP-3okj_U.pdb
P21243	PSA1_YEAST	YGL011C	86	0	Structure	3mg7	U	100	96.4	10	252	-1	-1	-1	P21243-EXP-3mg7_U.pdb
P21243	PSA1_YEAST	YGL011C	87	0	Structure	4fzc	U	100	96.4	10	252	-1	-1	-1	P21243-EXP-4fzc_U.pdb
P21243	PSA1_YEAST	YGL011C	88	0	Structure	4bgr	A	100	96.4	10	252	-1	-1	-1	P21243-EXP-4bgr_A.pdb
P21243	PSA1_YEAST	YGL011C	89	0	Structure	4fzc	G	100	96.4	10	252	-1	-1	-1	P21243-EXP-4fzc_G.pdb
P21243	PSA1_YEAST	YGL011C	90	0	Structure	3un8	G	100	96.4	10	252	-1	-1	-1	P21243-EXP-3un8_G.pdb
P21243	PSA1_YEAST	YGL011C	91	0	Structure	1z7q	A	100	96.4	10	252	-1	-1	-1	P21243-EXP-1z7q_A.pdb
P21243	PSA1_YEAST	YGL011C	92	0	Structure	3oev	U	100	96.4	10	252	-1	-1	-1	P21243-EXP-3oev_U.pdb
P21243	PSA1_YEAST	YGL011C	93	0	Structure	4eu2	O	100	95.6	10	250	-1	-1	-1	P21243-EXP-4eu2_O.pdb
P21243	PSA1_YEAST	YGL011C	94	0	Structure	4g4s	A	100	95.6	12	252	-1	-1	-1	P21243-EXP-4g4s_A.pdb
P21243	PSA1_YEAST	YGL011C	95	0	Structure	4eu2	A	100	95.6	10	250	-1	-1	-1	P21243-EXP-4eu2_A.pdb
P21243	PSA1_YEAST	YGL011C	96	0	Structure	3sdi	U	100	95.2	13	252	-1	-1	-1	P21243-EXP-3sdi_U.pdb
P21243	PSA1_YEAST	YGL011C	97	0	Structure	3sdi	G	100	95.2	13	252	-1	-1	-1	P21243-EXP-3sdi_G.pdb
P21243	PSA1_YEAST	YGL011C	98	0	Structure	1g0u	G	100	95.2	13	252	-1	-1	-1	P21243-EXP-1g0u_G.pdb
P21243	PSA1_YEAST	YGL011C	99	0	Structure	1g0u	U	100	95.2	13	252	-1	-1	-1	P21243-EXP-1g0u_U.pdb
P21243	PSA1_YEAST	YGL011C	100	0	Structure	1fnt	A	100	94.4	15	252	-1	-1	-1	P21243-EXP-1fnt_A.pdb
P21243	PSA1_YEAST	YGL011C	101	0	Structure	1fnt	O	100	94.4	15	252	-1	-1	-1	P21243-EXP-1fnt_O.pdb
P21243	PSA1_YEAST	YGL011C	102	0	Model	1iru	A	55	98	5	251	1	1.644	-0.43	P21243-MDL-P21243.1-1iru_A.pdb
P21243	PSA1_YEAST	YGL011C	103	0	Model	1iru	A	55	97.2	7	251	1	0	0	P21243-MDL-P21243.5-1iru_A.pdb
P40303	PSA4_YEAST	YOL038W	1	0	Structure	4bgr	D	100	95.7	3	245	-1	-1	-1	P40303-EXP-4bgr_D.pdb
P40303	PSA4_YEAST	YOL038W	2	0	Structure	3tdd	Q	100	94.9	3	243	-1	-1	-1	P40303-EXP-3tdd_Q.pdb
P40303	PSA4_YEAST	YOL038W	3	0	Structure	4fzc	C	100	94.9	3	243	-1	-1	-1	P40303-EXP-4fzc_C.pdb
P40303	PSA4_YEAST	YOL038W	4	0	Structure	4eu2	D	100	94.9	3	243	-1	-1	-1	P40303-EXP-4eu2_D.pdb
P40303	PSA4_YEAST	YOL038W	5	0	Structure	3gpw	Q	100	94.9	3	243	-1	-1	-1	P40303-EXP-3gpw_Q.pdb
P40303	PSA4_YEAST	YOL038W	6	0	Structure	4jsq	C	100	94.9	3	243	-1	-1	-1	P40303-EXP-4jsq_C.pdb
P40303	PSA4_YEAST	YOL038W	7	0	Structure	3oeu	C	100	94.9	3	243	-1	-1	-1	P40303-EXP-3oeu_C.pdb
P40303	PSA4_YEAST	YOL038W	8	0	Structure	3nzw	C	100	94.9	3	243	-1	-1	-1	P40303-EXP-3nzw_C.pdb
P40303	PSA4_YEAST	YOL038W	9	0	Structure	2f16	Q	100	94.9	3	243	-1	-1	-1	P40303-EXP-2f16_Q.pdb
P40303	PSA4_YEAST	YOL038W	10	0	Structure	3mg6	Q	100	94.9	3	243	-1	-1	-1	P40303-EXP-3mg6_Q.pdb
P40303	PSA4_YEAST	YOL038W	11	0	Structure	2fak	C	100	94.9	3	243	-1	-1	-1	P40303-EXP-2fak_C.pdb
P40303	PSA4_YEAST	YOL038W	12	0	Structure	3mg0	Q	100	94.9	3	243	-1	-1	-1	P40303-EXP-3mg0_Q.pdb
P40303	PSA4_YEAST	YOL038W	13	0	Structure	2zcy	Q	100	94.9	3	243	-1	-1	-1	P40303-EXP-2zcy_Q.pdb
P40303	PSA4_YEAST	YOL038W	14	0	Structure	3nzx	C	100	94.9	3	243	-1	-1	-1	P40303-EXP-3nzx_C.pdb
P40303	PSA4_YEAST	YOL038W	15	0	Structure	1jd2	C	100	94.9	3	243	-1	-1	-1	P40303-EXP-1jd2_C.pdb
P40303	PSA4_YEAST	YOL038W	16	0	Structure	3okj	C	100	94.9	3	243	-1	-1	-1	P40303-EXP-3okj_C.pdb
P40303	PSA4_YEAST	YOL038W	17	0	Structure	3mg7	C	100	94.9	3	243	-1	-1	-1	P40303-EXP-3mg7_C.pdb
P40303	PSA4_YEAST	YOL038W	18	0	Structure	3bdm	Q	100	94.9	3	243	-1	-1	-1	P40303-EXP-3bdm_Q.pdb
P40303	PSA4_YEAST	YOL038W	19	0	Structure	3oev	Q	100	94.9	3	243	-1	-1	-1	P40303-EXP-3oev_Q.pdb
P40303	PSA4_YEAST	YOL038W	20	0	Structure	3dy3	Q	100	94.9	3	243	-1	-1	-1	P40303-EXP-3dy3_Q.pdb
P40303	PSA4_YEAST	YOL038W	21	0	Structure	3sdk	Q	100	94.9	3	243	-1	-1	-1	P40303-EXP-3sdk_Q.pdb
P40303	PSA4_YEAST	YOL038W	22	0	Structure	4eu2	R	100	94.9	3	243	-1	-1	-1	P40303-EXP-4eu2_R.pdb
P40303	PSA4_YEAST	YOL038W	23	0	Structure	3mg8	Q	100	94.9	3	243	-1	-1	-1	P40303-EXP-3mg8_Q.pdb
P40303	PSA4_YEAST	YOL038W	24	0	Structure	4j70	C	100	94.9	3	243	-1	-1	-1	P40303-EXP-4j70_C.pdb
P40303	PSA4_YEAST	YOL038W	25	0	Structure	2gpl	Q	100	94.9	3	243	-1	-1	-1	P40303-EXP-2gpl_Q.pdb
P40303	PSA4_YEAST	YOL038W	26	0	Structure	3nzj	Q	100	94.9	3	243	-1	-1	-1	P40303-EXP-3nzj_Q.pdb
P40303	PSA4_YEAST	YOL038W	27	0	Structure	2zcy	C	100	94.9	3	243	-1	-1	-1	P40303-EXP-2zcy_C.pdb
P40303	PSA4_YEAST	YOL038W	28	0	Structure	3gpt	C	100	94.9	3	243	-1	-1	-1	P40303-EXP-3gpt_C.pdb
P40303	PSA4_YEAST	YOL038W	29	0	Structure	3e47	C	100	94.9	3	243	-1	-1	-1	P40303-EXP-3e47_C.pdb
P40303	PSA4_YEAST	YOL038W	30	0	Structure	2fak	Q	100	94.9	3	243	-1	-1	-1	P40303-EXP-2fak_Q.pdb
P40303	PSA4_YEAST	YOL038W	31	0	Structure	3hye	C	100	94.9	3	243	-1	-1	-1	P40303-EXP-3hye_C.pdb
P40303	PSA4_YEAST	YOL038W	32	0	Structure	4inu	C	100	94.9	3	243	-1	-1	-1	P40303-EXP-4inu_C.pdb
P40303	PSA4_YEAST	YOL038W	33	0	Structure	3un4	Q	100	94.9	3	243	-1	-1	-1	P40303-EXP-3un4_Q.pdb
P40303	PSA4_YEAST	YOL038W	34	0	Structure	3gpt	Q	100	94.9	3	243	-1	-1	-1	P40303-EXP-3gpt_Q.pdb
P40303	PSA4_YEAST	YOL038W	35	0	Structure	3mg0	C	100	94.9	3	243	-1	-1	-1	P40303-EXP-3mg0_C.pdb
P40303	PSA4_YEAST	YOL038W	36	0	Structure	3d29	Q	100	94.9	3	243	-1	-1	-1	P40303-EXP-3d29_Q.pdb
P40303	PSA4_YEAST	YOL038W	37	0	Structure	3un8	Q	100	94.9	3	243	-1	-1	-1	P40303-EXP-3un8_Q.pdb
P40303	PSA4_YEAST	YOL038W	38	0	Structure	3nzj	C	100	94.9	3	243	-1	-1	-1	P40303-EXP-3nzj_C.pdb
P40303	PSA4_YEAST	YOL038W	39	0	Structure	1z7q	R	100	94.9	3	243	-1	-1	-1	P40303-EXP-1z7q_R.pdb
P40303	PSA4_YEAST	YOL038W	40	0	Structure	3oeu	Q	100	94.9	3	243	-1	-1	-1	P40303-EXP-3oeu_Q.pdb
P40303	PSA4_YEAST	YOL038W	41	0	Structure	1z7q	D	100	94.9	3	243	-1	-1	-1	P40303-EXP-1z7q_D.pdb
P40303	PSA4_YEAST	YOL038W	42	0	Structure	3tdd	C	100	94.9	3	243	-1	-1	-1	P40303-EXP-3tdd_C.pdb
P40303	PSA4_YEAST	YOL038W	43	0	Structure	3un4	C	100	94.9	3	243	-1	-1	-1	P40303-EXP-3un4_C.pdb
P40303	PSA4_YEAST	YOL038W	44	0	Structure	3mg4	C	100	94.9	3	243	-1	-1	-1	P40303-EXP-3mg4_C.pdb
P40303	PSA4_YEAST	YOL038W	45	0	Structure	3shj	C	100	94.9	3	243	-1	-1	-1	P40303-EXP-3shj_C.pdb
P40303	PSA4_YEAST	YOL038W	46	0	Structure	3mg6	C	100	94.9	3	243	-1	-1	-1	P40303-EXP-3mg6_C.pdb
P40303	PSA4_YEAST	YOL038W	47	0	Structure	1jd2	X	100	94.9	3	243	-1	-1	-1	P40303-EXP-1jd2_X.pdb
P40303	PSA4_YEAST	YOL038W	48	0	Structure	3e47	Q	100	94.9	3	243	-1	-1	-1	P40303-EXP-3e47_Q.pdb
P40303	PSA4_YEAST	YOL038W	49	0	Structure	4inr	C	100	94.9	3	243	-1	-1	-1	P40303-EXP-4inr_C.pdb
P40303	PSA4_YEAST	YOL038W	50	0	Structure	1ryp	R	100	94.9	3	243	-1	-1	-1	P40303-EXP-1ryp_R.pdb
P40303	PSA4_YEAST	YOL038W	51	0	Structure	1g65	Q	100	94.9	3	243	-1	-1	-1	P40303-EXP-1g65_Q.pdb
P40303	PSA4_YEAST	YOL038W	52	0	Structure	4b4t	D	100	94.9	3	243	-1	-1	-1	P40303-EXP-4b4t_D.pdb
P40303	PSA4_YEAST	YOL038W	53	0	Structure	4inu	Q	100	94.9	3	243	-1	-1	-1	P40303-EXP-4inu_Q.pdb
P40303	PSA4_YEAST	YOL038W	54	0	Structure	3nzw	Q	100	94.9	3	243	-1	-1	-1	P40303-EXP-3nzw_Q.pdb
P40303	PSA4_YEAST	YOL038W	55	0	Structure	4jt0	C	100	94.9	3	243	-1	-1	-1	P40303-EXP-4jt0_C.pdb
P40303	PSA4_YEAST	YOL038W	56	0	Structure	3dy3	C	100	94.9	3	243	-1	-1	-1	P40303-EXP-3dy3_C.pdb
P40303	PSA4_YEAST	YOL038W	57	0	Structure	4inr	Q	100	94.9	3	243	-1	-1	-1	P40303-EXP-4inr_Q.pdb
P40303	PSA4_YEAST	YOL038W	58	0	Structure	3nzx	Q	100	94.9	3	243	-1	-1	-1	P40303-EXP-3nzx_Q.pdb
P40303	PSA4_YEAST	YOL038W	59	0	Structure	2gpl	C	100	94.9	3	243	-1	-1	-1	P40303-EXP-2gpl_C.pdb
P40303	PSA4_YEAST	YOL038W	60	0	Structure	4fzg	Q	100	94.9	3	243	-1	-1	-1	P40303-EXP-4fzg_Q.pdb
P40303	PSA4_YEAST	YOL038W	61	0	Structure	3sdk	C	100	94.9	3	243	-1	-1	-1	P40303-EXP-3sdk_C.pdb
P40303	PSA4_YEAST	YOL038W	62	0	Structure	4jsu	Q	100	94.9	3	243	-1	-1	-1	P40303-EXP-4jsu_Q.pdb
P40303	PSA4_YEAST	YOL038W	63	0	Structure	3un8	C	100	94.9	3	243	-1	-1	-1	P40303-EXP-3un8_C.pdb
P40303	PSA4_YEAST	YOL038W	64	0	Structure	1ryp	D	100	94.9	3	243	-1	-1	-1	P40303-EXP-1ryp_D.pdb
P40303	PSA4_YEAST	YOL038W	65	0	Structure	3oev	C	100	94.9	3	243	-1	-1	-1	P40303-EXP-3oev_C.pdb
P40303	PSA4_YEAST	YOL038W	66	0	Structure	3mg7	Q	100	94.9	3	243	-1	-1	-1	P40303-EXP-3mg7_Q.pdb
P40303	PSA4_YEAST	YOL038W	67	0	Structure	3hye	Q	100	94.9	3	243	-1	-1	-1	P40303-EXP-3hye_Q.pdb
P40303	PSA4_YEAST	YOL038W	68	0	Structure	3shj	Q	100	94.9	3	243	-1	-1	-1	P40303-EXP-3shj_Q.pdb
P40303	PSA4_YEAST	YOL038W	69	0	Structure	3bdm	C	100	94.9	3	243	-1	-1	-1	P40303-EXP-3bdm_C.pdb
P40303	PSA4_YEAST	YOL038W	70	0	Structure	3gpj	C	100	94.9	3	243	-1	-1	-1	P40303-EXP-3gpj_C.pdb
P40303	PSA4_YEAST	YOL038W	71	0	Structure	4gk7	Q	100	94.9	3	243	-1	-1	-1	P40303-EXP-4gk7_Q.pdb
P40303	PSA4_YEAST	YOL038W	72	0	Structure	3dy4	Q	100	94.9	3	243	-1	-1	-1	P40303-EXP-3dy4_Q.pdb
P40303	PSA4_YEAST	YOL038W	73	0	Structure	4j70	Q	100	94.9	3	243	-1	-1	-1	P40303-EXP-4j70_Q.pdb
P40303	PSA4_YEAST	YOL038W	74	0	Structure	1g65	C	100	94.9	3	243	-1	-1	-1	P40303-EXP-1g65_C.pdb
P40303	PSA4_YEAST	YOL038W	75	0	Structure	4fzg	C	100	94.9	3	243	-1	-1	-1	P40303-EXP-4fzg_C.pdb
P40303	PSA4_YEAST	YOL038W	76	0	Structure	4fzc	Q	100	94.9	3	243	-1	-1	-1	P40303-EXP-4fzc_Q.pdb
P40303	PSA4_YEAST	YOL038W	77	0	Structure	4int	Q	100	94.9	3	243	-1	-1	-1	P40303-EXP-4int_Q.pdb
P40303	PSA4_YEAST	YOL038W	78	0	Structure	3gpj	Q	100	94.9	3	243	-1	-1	-1	P40303-EXP-3gpj_Q.pdb
P40303	PSA4_YEAST	YOL038W	79	0	Structure	4jsu	C	100	94.9	3	243	-1	-1	-1	P40303-EXP-4jsu_C.pdb
P40303	PSA4_YEAST	YOL038W	80	0	Structure	4jt0	Q	100	94.9	3	243	-1	-1	-1	P40303-EXP-4jt0_Q.pdb
P40303	PSA4_YEAST	YOL038W	81	0	Structure	4jsq	Q	100	94.9	3	243	-1	-1	-1	P40303-EXP-4jsq_Q.pdb
P40303	PSA4_YEAST	YOL038W	82	0	Structure	4gk7	C	100	94.9	3	243	-1	-1	-1	P40303-EXP-4gk7_C.pdb
P40303	PSA4_YEAST	YOL038W	83	0	Structure	4int	C	100	94.9	3	243	-1	-1	-1	P40303-EXP-4int_C.pdb
P40303	PSA4_YEAST	YOL038W	84	0	Structure	3gpw	C	100	94.9	3	243	-1	-1	-1	P40303-EXP-3gpw_C.pdb
P40303	PSA4_YEAST	YOL038W	85	0	Structure	3dy4	C	100	94.9	3	243	-1	-1	-1	P40303-EXP-3dy4_C.pdb
P40303	PSA4_YEAST	YOL038W	86	0	Structure	3mg4	Q	100	94.9	3	243	-1	-1	-1	P40303-EXP-3mg4_Q.pdb
P40303	PSA4_YEAST	YOL038W	87	0	Structure	3d29	C	100	94.9	3	243	-1	-1	-1	P40303-EXP-3d29_C.pdb
P40303	PSA4_YEAST	YOL038W	88	0	Structure	3okj	Q	100	94.9	3	243	-1	-1	-1	P40303-EXP-3okj_Q.pdb
P40303	PSA4_YEAST	YOL038W	89	0	Structure	2f16	C	100	94.9	3	243	-1	-1	-1	P40303-EXP-2f16_C.pdb
P40303	PSA4_YEAST	YOL038W	90	0	Structure	3mg8	C	100	94.9	3	243	-1	-1	-1	P40303-EXP-3mg8_C.pdb
P40303	PSA4_YEAST	YOL038W	91	0	Structure	1fnt	R	100	94.1	5	243	-1	-1	-1	P40303-EXP-1fnt_R.pdb
P40303	PSA4_YEAST	YOL038W	92	0	Structure	1fnt	D	100	94.1	5	243	-1	-1	-1	P40303-EXP-1fnt_D.pdb
P40303	PSA4_YEAST	YOL038W	93	0	Structure	1g0u	Q	100	93.7	6	243	-1	-1	-1	P40303-EXP-1g0u_Q.pdb
P40303	PSA4_YEAST	YOL038W	94	0	Structure	3sdi	Q	100	93.7	6	243	-1	-1	-1	P40303-EXP-3sdi_Q.pdb
P40303	PSA4_YEAST	YOL038W	95	0	Structure	1g0u	C	100	93.7	6	243	-1	-1	-1	P40303-EXP-1g0u_C.pdb
P40303	PSA4_YEAST	YOL038W	96	0	Structure	3sdi	C	100	93.7	6	243	-1	-1	-1	P40303-EXP-3sdi_C.pdb
P40303	PSA4_YEAST	YOL038W	97	0	Structure	4g4s	D	96.1	90.2	9	237	-1	-1	-1	P40303-EXP-4g4s_D.pdb
P40303	PSA4_YEAST	YOL038W	98	0	Structure	3l5q	U	100	89.4	17	243	-1	-1	-1	P40303-EXP-3l5q_U.pdb
P40303	PSA4_YEAST	YOL038W	99	0	Structure	1vsy	D	100	89.4	17	243	-1	-1	-1	P40303-EXP-1vsy_D.pdb
P40303	PSA4_YEAST	YOL038W	100	0	Structure	3l5q	I	100	89.4	17	243	-1	-1	-1	P40303-EXP-3l5q_I.pdb
P40303	PSA4_YEAST	YOL038W	101	0	Structure	1vsy	R	100	89.4	17	243	-1	-1	-1	P40303-EXP-1vsy_R.pdb
P40303	PSA4_YEAST	YOL038W	102	0	Model	1iru	D	60	97.6	4	251	1	1.734	-0.86	P40303-MDL-P40303.9-1iru_D.pdb
P40303	PSA4_YEAST	YOL038W	103	0	Model	1iru	D	59	95.7	4	246	1	0	0	P40303-MDL-P40303.7-1iru_D.pdb
P40303	PSA4_YEAST	YOL038W	104	0	Model	1iru	D	58	96.5	4	248	1	0	0	P40303-MDL-P40303.6-1iru_D.pdb
P40303	PSA4_YEAST	YOL038W	105	0	Model	1j2p	A	43	96.5	2	246	1	0	0	P40303-MDL-P40303.4-1j2p_A.pdb
P40303	PSA4_YEAST	YOL038W	106	0	Model	1iru	F	33	94.5	2	241	1	0	0	P40303-MDL-P40303.5-1iru_F.pdb
P21242	PSA7_YEAST	YOR362C	1	0	Structure	4bgr	G	100	85.4	5	250	-1	-1	-1	P21242-EXP-4bgr_G.pdb
P21242	PSA7_YEAST	YOR362C	2	0	Structure	4g4s	G	100	85.4	1	246	-1	-1	-1	P21242-EXP-4g4s_G.pdb
P21242	PSA7_YEAST	YOR362C	3	0	Structure	3un4	T	100	84.7	5	248	-1	-1	-1	P21242-EXP-3un4_T.pdb
P21242	PSA7_YEAST	YOR362C	4	0	Structure	3mg0	F	100	84.7	5	248	-1	-1	-1	P21242-EXP-3mg0_F.pdb
P21242	PSA7_YEAST	YOR362C	5	0	Structure	4inr	T	100	84.7	5	248	-1	-1	-1	P21242-EXP-4inr_T.pdb
P21242	PSA7_YEAST	YOR362C	6	0	Structure	4fzc	F	100	84.7	5	248	-1	-1	-1	P21242-EXP-4fzc_F.pdb
P21242	PSA7_YEAST	YOR362C	7	0	Structure	4eu2	G	100	84.7	5	248	-1	-1	-1	P21242-EXP-4eu2_G.pdb
P21242	PSA7_YEAST	YOR362C	8	0	Structure	3nzx	T	100	84.7	5	248	-1	-1	-1	P21242-EXP-3nzx_T.pdb
P21242	PSA7_YEAST	YOR362C	9	0	Structure	2f16	F	100	84.7	5	248	-1	-1	-1	P21242-EXP-2f16_F.pdb
P21242	PSA7_YEAST	YOR362C	10	0	Structure	4fzg	T	100	84.7	5	248	-1	-1	-1	P21242-EXP-4fzg_T.pdb
P21242	PSA7_YEAST	YOR362C	11	0	Structure	2fak	F	100	84.7	5	248	-1	-1	-1	P21242-EXP-2fak_F.pdb
P21242	PSA7_YEAST	YOR362C	12	0	Structure	3nzw	F	100	84.7	5	248	-1	-1	-1	P21242-EXP-3nzw_F.pdb
P21242	PSA7_YEAST	YOR362C	13	0	Structure	4gk7	T	100	84.7	5	248	-1	-1	-1	P21242-EXP-4gk7_T.pdb
P21242	PSA7_YEAST	YOR362C	14	0	Structure	3mg4	T	100	84.7	5	248	-1	-1	-1	P21242-EXP-3mg4_T.pdb
P21242	PSA7_YEAST	YOR362C	15	0	Structure	3un8	F	100	84.7	5	248	-1	-1	-1	P21242-EXP-3un8_F.pdb
P21242	PSA7_YEAST	YOR362C	16	0	Structure	4jsu	T	100	84.7	5	248	-1	-1	-1	P21242-EXP-4jsu_T.pdb
P21242	PSA7_YEAST	YOR362C	17	0	Structure	3tdd	F	100	84.7	5	248	-1	-1	-1	P21242-EXP-3tdd_F.pdb
P21242	PSA7_YEAST	YOR362C	18	0	Structure	3d29	T	100	84.7	5	248	-1	-1	-1	P21242-EXP-3d29_T.pdb
P21242	PSA7_YEAST	YOR362C	19	0	Structure	1ryp	U	100	84.7	5	248	-1	-1	-1	P21242-EXP-1ryp_U.pdb
P21242	PSA7_YEAST	YOR362C	20	0	Structure	1g65	T	100	84.7	5	248	-1	-1	-1	P21242-EXP-1g65_T.pdb
P21242	PSA7_YEAST	YOR362C	21	0	Structure	1g65	F	100	84.7	5	248	-1	-1	-1	P21242-EXP-1g65_F.pdb
P21242	PSA7_YEAST	YOR362C	22	0	Structure	3tdd	T	100	84.7	5	248	-1	-1	-1	P21242-EXP-3tdd_T.pdb
P21242	PSA7_YEAST	YOR362C	23	0	Structure	4b4t	G	100	84.7	5	248	-1	-1	-1	P21242-EXP-4b4t_G.pdb
P21242	PSA7_YEAST	YOR362C	24	0	Structure	3shj	F	100	84.7	5	248	-1	-1	-1	P21242-EXP-3shj_F.pdb
P21242	PSA7_YEAST	YOR362C	25	0	Structure	4int	T	100	84.7	5	248	-1	-1	-1	P21242-EXP-4int_T.pdb
P21242	PSA7_YEAST	YOR362C	26	0	Structure	4jsq	F	100	84.7	5	248	-1	-1	-1	P21242-EXP-4jsq_F.pdb
P21242	PSA7_YEAST	YOR362C	27	0	Structure	3gpw	T	100	84.7	5	248	-1	-1	-1	P21242-EXP-3gpw_T.pdb
P21242	PSA7_YEAST	YOR362C	28	0	Structure	3dy4	F	100	84.7	5	248	-1	-1	-1	P21242-EXP-3dy4_F.pdb
P21242	PSA7_YEAST	YOR362C	29	0	Structure	3un8	T	100	84.7	5	248	-1	-1	-1	P21242-EXP-3un8_T.pdb
P21242	PSA7_YEAST	YOR362C	30	0	Structure	3bdm	T	100	84.7	5	248	-1	-1	-1	P21242-EXP-3bdm_T.pdb
P21242	PSA7_YEAST	YOR362C	31	0	Structure	4inu	F	100	84.7	5	248	-1	-1	-1	P21242-EXP-4inu_F.pdb
P21242	PSA7_YEAST	YOR362C	32	0	Structure	2fak	T	100	84.7	5	248	-1	-1	-1	P21242-EXP-2fak_T.pdb
P21242	PSA7_YEAST	YOR362C	33	0	Structure	1vsy	U	100	84.7	5	248	-1	-1	-1	P21242-EXP-1vsy_U.pdb
P21242	PSA7_YEAST	YOR362C	34	0	Structure	3gpt	F	100	84.7	5	248	-1	-1	-1	P21242-EXP-3gpt_F.pdb
P21242	PSA7_YEAST	YOR362C	35	0	Structure	3nzw	T	100	84.7	5	248	-1	-1	-1	P21242-EXP-3nzw_T.pdb
P21242	PSA7_YEAST	YOR362C	36	0	Structure	3dy4	T	100	84.7	5	248	-1	-1	-1	P21242-EXP-3dy4_T.pdb
P21242	PSA7_YEAST	YOR362C	37	0	Structure	3e47	F	100	84.7	5	248	-1	-1	-1	P21242-EXP-3e47_F.pdb
P21242	PSA7_YEAST	YOR362C	38	0	Structure	3okj	T	100	84.7	5	248	-1	-1	-1	P21242-EXP-3okj_T.pdb
P21242	PSA7_YEAST	YOR362C	39	0	Structure	3nzj	F	100	84.7	5	248	-1	-1	-1	P21242-EXP-3nzj_F.pdb
P21242	PSA7_YEAST	YOR362C	40	0	Structure	3hye	F	100	84.7	5	248	-1	-1	-1	P21242-EXP-3hye_F.pdb
P21242	PSA7_YEAST	YOR362C	41	0	Structure	4jt0	T	100	84.7	5	248	-1	-1	-1	P21242-EXP-4jt0_T.pdb
P21242	PSA7_YEAST	YOR362C	42	0	Structure	2zcy	T	100	84.7	5	248	-1	-1	-1	P21242-EXP-2zcy_T.pdb
P21242	PSA7_YEAST	YOR362C	43	0	Structure	4j70	T	100	84.7	5	248	-1	-1	-1	P21242-EXP-4j70_T.pdb
P21242	PSA7_YEAST	YOR362C	44	0	Structure	3gpw	F	100	84.7	5	248	-1	-1	-1	P21242-EXP-3gpw_F.pdb
P21242	PSA7_YEAST	YOR362C	45	0	Structure	4fzg	F	100	84.7	5	248	-1	-1	-1	P21242-EXP-4fzg_F.pdb
P21242	PSA7_YEAST	YOR362C	46	0	Structure	1ryp	G	100	84.7	5	248	-1	-1	-1	P21242-EXP-1ryp_G.pdb
P21242	PSA7_YEAST	YOR362C	47	0	Structure	3mg0	T	100	84.7	5	248	-1	-1	-1	P21242-EXP-3mg0_T.pdb
P21242	PSA7_YEAST	YOR362C	48	0	Structure	3l5q	L	100	84.7	5	248	-1	-1	-1	P21242-EXP-3l5q_L.pdb
P21242	PSA7_YEAST	YOR362C	49	0	Structure	2f16	T	100	84.7	5	248	-1	-1	-1	P21242-EXP-2f16_T.pdb
P21242	PSA7_YEAST	YOR362C	50	0	Structure	3gpj	T	100	84.7	5	248	-1	-1	-1	P21242-EXP-3gpj_T.pdb
P21242	PSA7_YEAST	YOR362C	51	0	Structure	3d29	F	100	84.7	5	248	-1	-1	-1	P21242-EXP-3d29_F.pdb
P21242	PSA7_YEAST	YOR362C	52	0	Structure	1jd2	1	100	84.7	5	248	-1	-1	-1	P21242-EXP-1jd2_1.pdb
P21242	PSA7_YEAST	YOR362C	53	0	Structure	4jsq	T	100	84.7	5	248	-1	-1	-1	P21242-EXP-4jsq_T.pdb
P21242	PSA7_YEAST	YOR362C	54	0	Structure	3dy3	T	100	84.7	5	248	-1	-1	-1	P21242-EXP-3dy3_T.pdb
P21242	PSA7_YEAST	YOR362C	55	0	Structure	3gpt	T	100	84.7	5	248	-1	-1	-1	P21242-EXP-3gpt_T.pdb
P21242	PSA7_YEAST	YOR362C	56	0	Structure	3bdm	F	100	84.7	5	248	-1	-1	-1	P21242-EXP-3bdm_F.pdb
P21242	PSA7_YEAST	YOR362C	57	0	Structure	2gpl	F	100	84.7	5	248	-1	-1	-1	P21242-EXP-2gpl_F.pdb
P21242	PSA7_YEAST	YOR362C	58	0	Structure	3hye	T	100	84.7	5	248	-1	-1	-1	P21242-EXP-3hye_T.pdb
P21242	PSA7_YEAST	YOR362C	59	0	Structure	3dy3	F	100	84.7	5	248	-1	-1	-1	P21242-EXP-3dy3_F.pdb
P21242	PSA7_YEAST	YOR362C	60	0	Structure	3shj	T	100	84.7	5	248	-1	-1	-1	P21242-EXP-3shj_T.pdb
P21242	PSA7_YEAST	YOR362C	61	0	Structure	4int	F	100	84.7	5	248	-1	-1	-1	P21242-EXP-4int_F.pdb
P21242	PSA7_YEAST	YOR362C	62	0	Structure	4eu2	U	100	84.7	5	248	-1	-1	-1	P21242-EXP-4eu2_U.pdb
P21242	PSA7_YEAST	YOR362C	63	0	Structure	1jd2	F	100	84.7	5	248	-1	-1	-1	P21242-EXP-1jd2_F.pdb
P21242	PSA7_YEAST	YOR362C	64	0	Structure	4gk7	F	100	84.7	5	248	-1	-1	-1	P21242-EXP-4gk7_F.pdb
P21242	PSA7_YEAST	YOR362C	65	0	Structure	3un4	F	100	84.7	5	248	-1	-1	-1	P21242-EXP-3un4_F.pdb
P21242	PSA7_YEAST	YOR362C	66	0	Structure	4fzc	T	100	84.7	5	248	-1	-1	-1	P21242-EXP-4fzc_T.pdb
P21242	PSA7_YEAST	YOR362C	67	0	Structure	3e47	T	100	84.7	5	248	-1	-1	-1	P21242-EXP-3e47_T.pdb
P21242	PSA7_YEAST	YOR362C	68	0	Structure	4jsu	F	100	84.7	5	248	-1	-1	-1	P21242-EXP-4jsu_F.pdb
P21242	PSA7_YEAST	YOR362C	69	0	Structure	4inu	T	100	84.7	5	248	-1	-1	-1	P21242-EXP-4inu_T.pdb
P21242	PSA7_YEAST	YOR362C	70	0	Structure	4jt0	F	100	84.7	5	248	-1	-1	-1	P21242-EXP-4jt0_F.pdb
P21242	PSA7_YEAST	YOR362C	71	0	Structure	4j70	F	100	84.7	5	248	-1	-1	-1	P21242-EXP-4j70_F.pdb
P21242	PSA7_YEAST	YOR362C	72	0	Structure	3l5q	X	100	84.7	5	248	-1	-1	-1	P21242-EXP-3l5q_X.pdb
P21242	PSA7_YEAST	YOR362C	73	0	Structure	3nzj	T	100	84.7	5	248	-1	-1	-1	P21242-EXP-3nzj_T.pdb
P21242	PSA7_YEAST	YOR362C	74	0	Structure	3gpj	F	100	84.7	5	248	-1	-1	-1	P21242-EXP-3gpj_F.pdb
P21242	PSA7_YEAST	YOR362C	75	0	Structure	3mg4	F	100	84.7	5	248	-1	-1	-1	P21242-EXP-3mg4_F.pdb
P21242	PSA7_YEAST	YOR362C	76	0	Structure	4inr	F	100	84.7	5	248	-1	-1	-1	P21242-EXP-4inr_F.pdb
P21242	PSA7_YEAST	YOR362C	77	0	Structure	2gpl	T	100	84.7	5	248	-1	-1	-1	P21242-EXP-2gpl_T.pdb
P21242	PSA7_YEAST	YOR362C	78	0	Structure	3nzx	F	100	84.7	5	248	-1	-1	-1	P21242-EXP-3nzx_F.pdb
P21242	PSA7_YEAST	YOR362C	79	0	Structure	1vsy	G	100	84.7	5	248	-1	-1	-1	P21242-EXP-1vsy_G.pdb
P21242	PSA7_YEAST	YOR362C	80	0	Structure	3okj	F	100	84.7	5	248	-1	-1	-1	P21242-EXP-3okj_F.pdb
P21242	PSA7_YEAST	YOR362C	81	0	Structure	2zcy	F	100	84.7	5	248	-1	-1	-1	P21242-EXP-2zcy_F.pdb
P21242	PSA7_YEAST	YOR362C	82	0	Structure	1z7q	U	100	84.4	6	248	-1	-1	-1	P21242-EXP-1z7q_U.pdb
P21242	PSA7_YEAST	YOR362C	83	0	Structure	1z7q	G	100	84.4	6	248	-1	-1	-1	P21242-EXP-1z7q_G.pdb
P21242	PSA7_YEAST	YOR362C	84	0	Structure	3sdi	F	100	84	7	248	-1	-1	-1	P21242-EXP-3sdi_F.pdb
P21242	PSA7_YEAST	YOR362C	85	0	Structure	3sdi	T	100	84	7	248	-1	-1	-1	P21242-EXP-3sdi_T.pdb
P21242	PSA7_YEAST	YOR362C	86	0	Structure	1g0u	T	100	84	7	248	-1	-1	-1	P21242-EXP-1g0u_T.pdb
P21242	PSA7_YEAST	YOR362C	87	0	Structure	1g0u	F	100	84	7	248	-1	-1	-1	P21242-EXP-1g0u_F.pdb
P21242	PSA7_YEAST	YOR362C	88	0	Structure	1fnt	G	100	83.3	9	248	-1	-1	-1	P21242-EXP-1fnt_G.pdb
P21242	PSA7_YEAST	YOR362C	89	0	Structure	1fnt	U	100	83.3	9	248	-1	-1	-1	P21242-EXP-1fnt_U.pdb
P21242	PSA7_YEAST	YOR362C	90	0	Structure	3oev	T	100	82.3	12	248	-1	-1	-1	P21242-EXP-3oev_T.pdb
P21242	PSA7_YEAST	YOR362C	91	0	Structure	3oev	F	100	82.3	12	248	-1	-1	-1	P21242-EXP-3oev_F.pdb
P21242	PSA7_YEAST	YOR362C	92	0	Structure	3mg8	F	100	82.3	12	248	-1	-1	-1	P21242-EXP-3mg8_F.pdb
P21242	PSA7_YEAST	YOR362C	93	0	Structure	3mg7	T	100	82.3	12	248	-1	-1	-1	P21242-EXP-3mg7_T.pdb
P21242	PSA7_YEAST	YOR362C	94	0	Structure	3oeu	T	100	82.3	12	248	-1	-1	-1	P21242-EXP-3oeu_T.pdb
P21242	PSA7_YEAST	YOR362C	95	0	Structure	3mg6	F	100	82.3	12	248	-1	-1	-1	P21242-EXP-3mg6_F.pdb
P21242	PSA7_YEAST	YOR362C	96	0	Structure	3mg8	T	100	82.3	12	248	-1	-1	-1	P21242-EXP-3mg8_T.pdb
P21242	PSA7_YEAST	YOR362C	97	0	Structure	3oeu	F	100	82.3	12	248	-1	-1	-1	P21242-EXP-3oeu_F.pdb
P21242	PSA7_YEAST	YOR362C	98	0	Structure	3mg7	F	100	82.3	12	248	-1	-1	-1	P21242-EXP-3mg7_F.pdb
P21242	PSA7_YEAST	YOR362C	99	0	Structure	3mg6	T	100	82.3	12	248	-1	-1	-1	P21242-EXP-3mg6_T.pdb
P21242	PSA7_YEAST	YOR362C	100	0	Structure	3sdk	F	100	81.9	13	248	-1	-1	-1	P21242-EXP-3sdk_F.pdb
P21242	PSA7_YEAST	YOR362C	101	0	Structure	3sdk	T	100	81.9	13	248	-1	-1	-1	P21242-EXP-3sdk_T.pdb
P21242	PSA7_YEAST	YOR362C	102	0	Model	1iru	G	52	85.4	2	247	1	0	0	P21242-MDL-P21242.4-1iru_G.pdb
P21242	PSA7_YEAST	YOR362C	103	1	Model	1iru	G	51	0.9	2	247	1	0	0	P21242-MDL-P21242.11-1iru_G.pdb
P21242	PSA7_YEAST	YOR362C	104	1	Model	1j2p	A	34	0.9	5	251	1	0	0	P21242-MDL-P21242.9-1j2p_A.pdb
P21242	PSA7_YEAST	YOR362C	105	1	Model	1iru	D	32	0.9	8	255	1	0	0	P21242-MDL-P21242.12-1iru_D.pdb
P32795	YME1_YEAST	YPR024W	1	1	Model	2ce7	A	46	58.1	275	708	1	1.14	-0.88	P32795-MDL-P32795.4-2ce7_A.pdb
P32795	YME1_YEAST	YPR024W	2	1	Model	1lv7	A	60	33.5	272	521	1	1.14	-1.52	P32795-MDL-P32795.2-1lv7_A.pdb
P32795	YME1_YEAST	YPR024W	3	1	Model	1lv7	A	59	32.8	277	521	1	0	0	P32795-MDL-P32795.13-1lv7_A.pdb
P32795	YME1_YEAST	YPR024W	4	1	Model	1ixz	A	52	32.1	275	514	1	0	0	P32795-MDL-P32795.7-1ixz_A.pdb
P00360	G3P1_YEAST	YJL052W	1	0	Model	2i5p	O	81	99.4	1	330	1	1.943	-1.07	P00360-MDL-P00360.3-2i5p_O.pdb
P00360	G3P1_YEAST	YJL052W	2	0	Model	1gad	O	70	99.4	2	331	1	1.95	-1.68	P00360-MDL-P00360.6-1gad_O.pdb
P00360	G3P1_YEAST	YJL052W	3	0	Model	1gad	O	70	99.4	2	331	1	0	0	P00360-MDL-P00360.1-1gad_O.pdb
P00360	G3P1_YEAST	YJL052W	4	0	Model	1u8f	O	64	99.1	2	330	1	1.84	-1.17	P00360-MDL-P00360.5-1u8f_O.pdb
P00360	G3P1_YEAST	YJL052W	5	0	Model	1obf	O	45	99.7	2	332	1	0	0	P00360-MDL-P00360.4-1obf_O.pdb
P00360	G3P1_YEAST	YJL052W	6	1	Model	1hdg	O	50	1	3	331	1	0	0	P00360-MDL-P00360.7-1hdg_O.pdb
P00360	G3P1_YEAST	YJL052W	7	1	Model	1obf	O	46	1	2	332	1	0	0	P00360-MDL-P00360.8-1obf_O.pdb
P00358	G3P2_YEAST	YJR009C	1	0	Model	2i5p	O	83	99.4	1	330	1	1.958	-1.06	P00358-MDL-P00358.1-2i5p_O.pdb
P00358	G3P2_YEAST	YJR009C	2	0	Model	1gad	O	68	99.4	2	331	1	1.92	-1.58	P00358-MDL-P00358.2-1gad_O.pdb
P00358	G3P2_YEAST	YJR009C	3	0	Model	1gad	O	68	99.4	2	331	1	0	0	P00358-MDL-P00358.5-1gad_O.pdb
P00358	G3P2_YEAST	YJR009C	4	0	Model	1j0x	O	66	99.1	2	330	1	0	0	P00358-MDL-P00358.4-1j0x_O.pdb
P00358	G3P2_YEAST	YJR009C	5	0	Model	1u8f	O	65	99.4	2	331	1	1.785	-1.13	P00358-MDL-P00358.7-1u8f_O.pdb
P00358	G3P2_YEAST	YJR009C	6	0	Model	3gnq	A	46	99.7	2	332	1	1.605	-0.8	P00358-MDL-P00358.6-3gnq_A.pdb
P00358	G3P2_YEAST	YJR009C	7	0	Model	1obf	O	44	99.7	2	332	1	0	0	P00358-MDL-P00358.3-1obf_O.pdb
P00358	G3P2_YEAST	YJR009C	8	1	Model	1hdg	O	53	1	3	331	1	0	0	P00358-MDL-P00358.8-1hdg_O.pdb
P00358	G3P2_YEAST	YJR009C	9	1	Model	1obf	O	44	1	2	332	1	0	0	P00358-MDL-P00358.9-1obf_O.pdb
P36017	VPS21_YEAST	YOR089C	1	0	Structure	1ek0	A	98.8	81	5	174	-1	-1	-1	P36017-EXP-1ek0_A.pdb
P36017	VPS21_YEAST	YOR089C	2	0	Model	2bme	A	38	81.9	8	179	1	0	0	P36017-MDL-P36017.3-2bme_A.pdb
P36017	VPS21_YEAST	YOR089C	3	0	Model	2bcg	Y	34	90.9	8	198	1	1.415	-0.9	P36017-MDL-P36017.11-2bcg_Y.pdb
P36017	VPS21_YEAST	YOR089C	4	0	Model	1ukv	Y	33	95.7	8	208	1	0	0	P36017-MDL-P36017.5-1ukv_Y.pdb
P36017	VPS21_YEAST	YOR089C	5	0	Model	1uad	A	31	83.3	4	178	1	0	0	P36017-MDL-P36017.14-1uad_A.pdb
P36017	VPS21_YEAST	YOR089C	6	0	Model	2x19	A	31	80	5	172	1	1.226	-0.53	P36017-MDL-P36017.12-2x19_A.pdb
P25298	RNA14_YEAST	YMR061W	1	1	Structure	2l9b	B	100	5.9	630	669	-1	-1	-1	P25298-EXP-2l9b_B.pdb
Q12230	LSP1_YEAST	YPL004C	1	1	Structure	3plt	A	100	62.8	51	264	-1	-1	-1	Q12230-EXP-3plt_A.pdb
Q12230	LSP1_YEAST	YPL004C	2	1	Structure	3plt	C	100	62.5	52	264	-1	-1	-1	Q12230-EXP-3plt_C.pdb
Q12230	LSP1_YEAST	YPL004C	3	1	Structure	3plt	B	96.7	62.8	51	264	-1	-1	-1	Q12230-EXP-3plt_B.pdb
Q00955	ACAC_YEAST	YNR016C	1	1	Structure	1w96	A	99.3	24.8	14	566	-1	-1	-1	Q00955-EXP-1w96_A.pdb
Q00955	ACAC_YEAST	YNR016C	1	2	Structure	3tvw	A	98	32.1	1480	2195	-1	-1	-1	Q00955-EXP-3tvw_A.pdb
Q00955	ACAC_YEAST	YNR016C	2	1	Structure	1w93	A	99.3	24.8	14	566	-1	-1	-1	Q00955-EXP-1w93_A.pdb
Q00955	ACAC_YEAST	YNR016C	2	2	Structure	1od2	A	97.6	32.2	1484	2203	-1	-1	-1	Q00955-EXP-1od2_A.pdb
Q00955	ACAC_YEAST	YNR016C	3	1	Structure	1w96	B	97.8	24.8	13	566	-1	-1	-1	Q00955-EXP-1w96_B.pdb
Q00955	ACAC_YEAST	YNR016C	3	2	Structure	1uyr	A	94.7	33	1482	2218	-1	-1	-1	Q00955-EXP-1uyr_A.pdb
Q00955	ACAC_YEAST	YNR016C	4	1	Structure	1w96	C	100	24	14	550	-1	-1	-1	Q00955-EXP-1w96_C.pdb
Q00955	ACAC_YEAST	YNR016C	4	2	Structure	1uyr	B	94.6	32.9	1484	2218	-1	-1	-1	Q00955-EXP-1uyr_B.pdb
Q00955	ACAC_YEAST	YNR016C	5	1	Model	1ulz	A	31	23.1	58	574	1	0	0	Q00955-MDL-Q00955.8-1ulz_A.pdb
Q00955	ACAC_YEAST	YNR016C	5	2	Structure	3tvw	B	98	31.8	1480	2189	-1	-1	-1	Q00955-EXP-3tvw_B.pdb
Q00955	ACAC_YEAST	YNR016C	6	1	Structure	3h0s	A	96.8	32.1	1480	2195	-1	-1	-1	Q00955-EXP-3h0s_A.pdb
Q00955	ACAC_YEAST	YNR016C	7	1	Structure	3pgq	A	96.1	32.1	1480	2195	-1	-1	-1	Q00955-EXP-3pgq_A.pdb
Q00955	ACAC_YEAST	YNR016C	8	1	Structure	3k8x	A	96.1	32.1	1480	2195	-1	-1	-1	Q00955-EXP-3k8x_A.pdb
Q00955	ACAC_YEAST	YNR016C	9	1	Structure	3tv5	A	95.9	32.1	1480	2195	-1	-1	-1	Q00955-EXP-3tv5_A.pdb
Q00955	ACAC_YEAST	YNR016C	10	1	Structure	3tvu	A	95.9	32.1	1480	2195	-1	-1	-1	Q00955-EXP-3tvu_A.pdb
Q00955	ACAC_YEAST	YNR016C	11	1	Structure	3tz3	A	95.9	32	1480	2193	-1	-1	-1	Q00955-EXP-3tz3_A.pdb
Q00955	ACAC_YEAST	YNR016C	12	1	Structure	3tvw	C	98	31.3	1495	2192	-1	-1	-1	Q00955-EXP-3tvw_C.pdb
Q00955	ACAC_YEAST	YNR016C	13	1	Structure	3tz3	B	95.9	31.9	1480	2191	-1	-1	-1	Q00955-EXP-3tz3_B.pdb
Q00955	ACAC_YEAST	YNR016C	14	1	Structure	3k8x	B	96.1	31.8	1480	2189	-1	-1	-1	Q00955-EXP-3k8x_B.pdb
Q00955	ACAC_YEAST	YNR016C	15	1	Structure	1w2x	A	95.4	32	1482	2196	-1	-1	-1	Q00955-EXP-1w2x_A.pdb
Q00955	ACAC_YEAST	YNR016C	16	1	Structure	3h0q	A	95.4	32	1482	2195	-1	-1	-1	Q00955-EXP-3h0q_A.pdb
Q00955	ACAC_YEAST	YNR016C	17	1	Structure	3h0j	A	95.4	32	1482	2195	-1	-1	-1	Q00955-EXP-3h0j_A.pdb
Q00955	ACAC_YEAST	YNR016C	18	1	Structure	1uyt	A	95.4	32	1482	2196	-1	-1	-1	Q00955-EXP-1uyt_A.pdb
Q00955	ACAC_YEAST	YNR016C	19	1	Structure	3tvu	B	95.9	31.8	1480	2189	-1	-1	-1	Q00955-EXP-3tvu_B.pdb
Q00955	ACAC_YEAST	YNR016C	20	1	Structure	3tv5	B	95.9	31.8	1480	2189	-1	-1	-1	Q00955-EXP-3tv5_B.pdb
Q00955	ACAC_YEAST	YNR016C	21	1	Structure	3pgq	B	95.4	31.9	1480	2192	-1	-1	-1	Q00955-EXP-3pgq_B.pdb
Q00955	ACAC_YEAST	YNR016C	22	1	Structure	1od2	B	97.6	31.2	1495	2190	-1	-1	-1	Q00955-EXP-1od2_B.pdb
Q00955	ACAC_YEAST	YNR016C	23	1	Structure	3h0s	B	95.4	31.8	1480	2189	-1	-1	-1	Q00955-EXP-3h0s_B.pdb
Q00955	ACAC_YEAST	YNR016C	24	1	Structure	1w2x	B	95.3	31.8	1482	2190	-1	-1	-1	Q00955-EXP-1w2x_B.pdb
Q00955	ACAC_YEAST	YNR016C	25	1	Structure	1uyt	B	95.3	31.8	1482	2190	-1	-1	-1	Q00955-EXP-1uyt_B.pdb
Q00955	ACAC_YEAST	YNR016C	26	1	Structure	3k8x	C	96	31.5	1491	2193	-1	-1	-1	Q00955-EXP-3k8x_C.pdb
Q00955	ACAC_YEAST	YNR016C	27	1	Structure	3pgq	C	96	31.5	1491	2193	-1	-1	-1	Q00955-EXP-3pgq_C.pdb
Q00955	ACAC_YEAST	YNR016C	28	1	Structure	3tv5	C	96.3	31.4	1492	2192	-1	-1	-1	Q00955-EXP-3tv5_C.pdb
Q00955	ACAC_YEAST	YNR016C	29	1	Structure	3h0j	B	95.3	31.7	1482	2189	-1	-1	-1	Q00955-EXP-3h0j_B.pdb
Q00955	ACAC_YEAST	YNR016C	30	1	Structure	3h0q	B	95.3	31.7	1482	2189	-1	-1	-1	Q00955-EXP-3h0q_B.pdb
Q00955	ACAC_YEAST	YNR016C	31	1	Structure	3tvu	C	96.3	31.3	1495	2192	-1	-1	-1	Q00955-EXP-3tvu_C.pdb
Q00955	ACAC_YEAST	YNR016C	32	1	Structure	3h0s	C	95.3	31.4	1492	2192	-1	-1	-1	Q00955-EXP-3h0s_C.pdb
Q00955	ACAC_YEAST	YNR016C	33	1	Structure	3tz3	C	95.6	31.3	1494	2191	-1	-1	-1	Q00955-EXP-3tz3_C.pdb
Q00955	ACAC_YEAST	YNR016C	34	1	Structure	1od4	A	93	32.1	1480	2196	-1	-1	-1	Q00955-EXP-1od4_A.pdb
Q00955	ACAC_YEAST	YNR016C	35	1	Structure	1od4	B	93	32.1	1480	2196	-1	-1	-1	Q00955-EXP-1od4_B.pdb
Q00955	ACAC_YEAST	YNR016C	36	1	Structure	1uyt	C	95.3	31.3	1492	2190	-1	-1	-1	Q00955-EXP-1uyt_C.pdb
Q00955	ACAC_YEAST	YNR016C	37	1	Structure	1w2x	C	95.3	31.3	1492	2190	-1	-1	-1	Q00955-EXP-1w2x_C.pdb
Q00955	ACAC_YEAST	YNR016C	38	1	Structure	3h0q	C	95.3	31.3	1492	2189	-1	-1	-1	Q00955-EXP-3h0q_C.pdb
Q00955	ACAC_YEAST	YNR016C	39	1	Structure	3h0j	C	95.3	31.3	1492	2189	-1	-1	-1	Q00955-EXP-3h0j_C.pdb
Q00955	ACAC_YEAST	YNR016C	40	1	Structure	1od4	C	92.9	31.6	1492	2196	-1	-1	-1	Q00955-EXP-1od4_C.pdb
Q00955	ACAC_YEAST	YNR016C	41	1	Structure	1uys	B	92.2	31.8	1482	2190	-1	-1	-1	Q00955-EXP-1uys_B.pdb
Q00955	ACAC_YEAST	YNR016C	42	1	Structure	1uys	A	92.2	31.8	1482	2190	-1	-1	-1	Q00955-EXP-1uys_A.pdb
Q00955	ACAC_YEAST	YNR016C	43	1	Structure	1uys	C	92.1	31.3	1492	2190	-1	-1	-1	Q00955-EXP-1uys_C.pdb
Q00955	ACAC_YEAST	YNR016C	44	1	Structure	1uyv	A	79.7	32	1482	2196	-1	-1	-1	Q00955-EXP-1uyv_A.pdb
Q00955	ACAC_YEAST	YNR016C	45	1	Structure	1uyv	C	80.1	31.8	1492	2201	-1	-1	-1	Q00955-EXP-1uyv_C.pdb
Q00955	ACAC_YEAST	YNR016C	46	1	Structure	1uyv	B	77.7	31.8	1482	2190	-1	-1	-1	Q00955-EXP-1uyv_B.pdb
P34756	FAB1_YEAST	YFR019W	1	1	Model	1z2q	A	36	3.2	233	304	0.92	0	0	P34756-MDL-P34756.21-1z2q_A.pdb
P07246	ADH3_YEAST	YMR083W	1	0	Model	2hcy	A	80	92.5	29	375	1	1.93	-1.13	P07246-MDL-P07246.13-2hcy_A.pdb
P07246	ADH3_YEAST	YMR083W	2	0	Model	2hcy	A	80	92.5	29	375	1	1.97	-1.51	P07246-MDL-P07246.32-2hcy_A.pdb
P07246	ADH3_YEAST	YMR083W	3	0	Model	1llu	A	41	91.5	30	372	1	0	0	P07246-MDL-P07246.1-1llu_A.pdb
P07246	ADH3_YEAST	YMR083W	4	0	Model	1rjw	A	41	90.7	34	373	1	0	0	P07246-MDL-P07246.23-1rjw_A.pdb
P07246	ADH3_YEAST	YMR083W	5	0	Model	4ej6	A	21	90.7	32	371	1	1.173	0.08	P07246-MDL-P07246.10-4ej6_A.pdb
P07246	ADH3_YEAST	YMR083W	6	0	Model	3uog	A	21	87.7	44	372	1	1.162	0.03	P07246-MDL-P07246.20-3uog_A.pdb
P07246	ADH3_YEAST	YMR083W	7	0	Model	4ejm	A	20	90.7	32	371	1	1.165	0.06	P07246-MDL-P07246.2-4ejm_A.pdb
P07246	ADH3_YEAST	YMR083W	8	0	Model	4j6f	A	17	92.8	24	371	1	1.123	0.52	P07246-MDL-P07246.14-4j6f_A.pdb
P53299	TIM13_YEAST	YGR181W	1	1	Structure	3cjh	I	100	51.4	46	99	-1	-1	-1	P53299-EXP-3cjh_I.pdb
P53299	TIM13_YEAST	YGR181W	2	1	Structure	3cjh	A	100	49.5	46	97	-1	-1	-1	P53299-EXP-3cjh_A.pdb
P53299	TIM13_YEAST	YGR181W	3	1	Structure	3cjh	G	100	49.5	46	97	-1	-1	-1	P53299-EXP-3cjh_G.pdb
P53299	TIM13_YEAST	YGR181W	4	1	Structure	3cjh	K	100	49.5	46	97	-1	-1	-1	P53299-EXP-3cjh_K.pdb
P53299	TIM13_YEAST	YGR181W	5	1	Structure	3cjh	E	100	49.5	46	97	-1	-1	-1	P53299-EXP-3cjh_E.pdb
P53299	TIM13_YEAST	YGR181W	6	1	Structure	3cjh	C	100	49.5	46	97	-1	-1	-1	P53299-EXP-3cjh_C.pdb
P57744	TIM8_YEAST	YJR135W-A	1	1	Structure	3cjh	B	100	67.8	28	86	-1	-1	-1	P57744-EXP-3cjh_B.pdb
P57744	TIM8_YEAST	YJR135W-A	2	1	Structure	3cjh	H	100	66.7	29	86	-1	-1	-1	P57744-EXP-3cjh_H.pdb
P57744	TIM8_YEAST	YJR135W-A	3	1	Structure	3cjh	L	100	66.7	29	86	-1	-1	-1	P57744-EXP-3cjh_L.pdb
P57744	TIM8_YEAST	YJR135W-A	4	1	Structure	3cjh	F	100	66.7	29	86	-1	-1	-1	P57744-EXP-3cjh_F.pdb
P57744	TIM8_YEAST	YJR135W-A	5	1	Structure	3cjh	J	100	65.5	29	85	-1	-1	-1	P57744-EXP-3cjh_J.pdb
P57744	TIM8_YEAST	YJR135W-A	6	1	Structure	3cjh	D	100	63.2	29	83	-1	-1	-1	P57744-EXP-3cjh_D.pdb
P57744	TIM8_YEAST	YJR135W-A	7	1	Model	2bsk	B	28	66.7	28	85	1	1.1	-0.72	P57744-MDL-P57744.3-2bsk_B.pdb
P57744	TIM8_YEAST	YJR135W-A	8	1	Model	2bsk	B	27	67.8	28	86	0.91	1.11	-0.9	P57744-MDL-P57744.2-2bsk_B.pdb
P25374	NFS1_YEAST	YCL017C	1	1	Model	1p3w	B	56	77.9	99	485	1	1.508	-0.98	P25374-MDL-P25374.25-1p3w_B.pdb
P25374	NFS1_YEAST	YCL017C	2	1	Model	1p3w	B	56	77.9	99	485	1	0	0	P25374-MDL-P25374.9-1p3w_B.pdb
P25374	NFS1_YEAST	YCL017C	3	1	Model	1p3w	B	56	77.9	99	485	1	1.504	-0.93	P25374-MDL-P25374.1-1p3w_B.pdb
P25374	NFS1_YEAST	YCL017C	4	1	Model	1p3w	B	56	77.9	99	485	1	1.57	-1.58	P25374-MDL-P25374.7-1p3w_B.pdb
P25374	NFS1_YEAST	YCL017C	5	1	Model	1p3w	B	55	78.1	98	485	1	0	0	P25374-MDL-P25374.3-1p3w_B.pdb
P41808	SMK1_YEAST	YPR054W	1	0	Model	2gph	A	43	88.4	38	380	1	1.45	-1.16	P41808-MDL-P41808.14-2gph_A.pdb
P41808	SMK1_YEAST	YPR054W	2	0	Model	2gph	A	42	89.9	32	380	1	1.377	-0.42	P41808-MDL-P41808.22-2gph_A.pdb
P41808	SMK1_YEAST	YPR054W	3	0	Model	3coi	A	42	89.2	34	379	1	1.352	-0.45	P41808-MDL-P41808.19-3coi_A.pdb
P41808	SMK1_YEAST	YPR054W	4	0	Model	2gph	A	41	90.7	30	381	1	1.47	-1.24	P41808-MDL-P41808.21-2gph_A.pdb
P41808	SMK1_YEAST	YPR054W	5	0	Model	1pme		41	89.7	38	385	1	0	0	P41808-MDL-P41808.13-1pme_.pdb
P41808	SMK1_YEAST	YPR054W	6	0	Model	2b9f	A	40	88.7	33	376	1	1.342	-0.5	P41808-MDL-P41808.1-2b9f_A.pdb
P41808	SMK1_YEAST	YPR054W	7	0	Model	3coi	A	39	93.8	17	380	1	0	0	P41808-MDL-P41808.15-3coi_A.pdb
P41808	SMK1_YEAST	YPR054W	8	0	Model	1ywr	A	38	92.8	24	383	1	0	0	P41808-MDL-P41808.2-1ywr_A.pdb
P41808	SMK1_YEAST	YPR054W	9	0	Model	3coi	A	29	90.5	29	379	1	1.168	0.3	P41808-MDL-P41808.12-3coi_A.pdb
P25379	STDH_YEAST	YCL064C	1	0	Model	1pwh	A	41	89.2	7	327	1	1.41	-1.21	P25379-MDL-P25379.1-1pwh_A.pdb
P25379	STDH_YEAST	YCL064C	2	0	Model	1pwe	A	41	89.2	7	327	1	1.323	-0.32	P25379-MDL-P25379.8-1pwe_A.pdb
P25379	STDH_YEAST	YCL064C	3	0	Model	1pwh	A	39	86.9	7	319	1	0	0	P25379-MDL-P25379.3-1pwh_A.pdb
P25379	STDH_YEAST	YCL064C	4	0	Model	1pwh	A	38	90.3	4	328	1	1.388	-0.86	P25379-MDL-P25379.10-1pwh_A.pdb
P25379	STDH_YEAST	YCL064C	5	0	Model	1pwh	A	37	93.6	2	338	1	1.46	-1.26	P25379-MDL-P25379.7-1pwh_A.pdb
P25379	STDH_YEAST	YCL064C	6	0	Model	1pwh	A	37	92.5	7	339	1	1.402	-0.78	P25379-MDL-P25379.2-1pwh_A.pdb
Q01532	BLH1_YEAST	YNL239W	1	0	Structure	1a6r	A	99.6	94	30	483	-1	-1	-1	Q01532-EXP-1a6r_A.pdb
Q01532	BLH1_YEAST	YNL239W	2	0	Structure	2e00	A	99.8	93.8	30	482	-1	-1	-1	Q01532-EXP-2e00_A.pdb
Q01532	BLH1_YEAST	YNL239W	3	0	Structure	2dzy	A	99.8	93.8	30	482	-1	-1	-1	Q01532-EXP-2dzy_A.pdb
Q01532	BLH1_YEAST	YNL239W	4	0	Structure	3gcb	A	99.6	93.8	30	482	-1	-1	-1	Q01532-EXP-3gcb_A.pdb
Q01532	BLH1_YEAST	YNL239W	5	0	Structure	2dzz	A	97.6	93.8	30	482	-1	-1	-1	Q01532-EXP-2dzz_A.pdb
Q01532	BLH1_YEAST	YNL239W	6	0	Structure	2e03	A	97.1	93.8	30	482	-1	-1	-1	Q01532-EXP-2e03_A.pdb
Q01532	BLH1_YEAST	YNL239W	7	0	Structure	2e01	A	97.1	93.8	30	482	-1	-1	-1	Q01532-EXP-2e01_A.pdb
Q01532	BLH1_YEAST	YNL239W	8	0	Structure	2e02	A	96.7	93.8	30	482	-1	-1	-1	Q01532-EXP-2e02_A.pdb
Q01532	BLH1_YEAST	YNL239W	9	0	Structure	1gcb	A	100	93.6	31	482	-1	-1	-1	Q01532-EXP-1gcb_A.pdb
Q01532	BLH1_YEAST	YNL239W	10	1	Model	2cb5	A	39	0.9	31	482	1	0	0	Q01532-MDL-Q01532.5-2cb5_A.pdb
P02992	EFTU_YEAST	YOR187W	1	0	Model	2c77	A	68	90.6	42	437	1	1.739	-0.95	P02992-MDL-P02992.9-2c77_A.pdb
P02992	EFTU_YEAST	YOR187W	2	0	Model	2c78	A	68	89.7	46	437	1	1.77	-1.35	P02992-MDL-P02992.12-2c78_A.pdb
P02992	EFTU_YEAST	YOR187W	3	0	Model	1exm	A	67	90.6	42	437	1	0	0	P02992-MDL-P02992.3-1exm_A.pdb
P02992	EFTU_YEAST	YOR187W	4	0	Model	1exm	A	66	91.1	40	437	1	0	0	P02992-MDL-P02992.7-1exm_A.pdb
P02992	EFTU_YEAST	YOR187W	5	0	Model	1d2e	A	63	89	46	434	1	1.704	-1.04	P02992-MDL-P02992.13-1d2e_A.pdb
P16892	FUS3_YEAST	YBL016W	1	0	Structure	2b9f	A	95.5	100	1	353	-1	-1	-1	P16892-EXP-2b9f_A.pdb
P16892	FUS3_YEAST	YBL016W	2	0	Structure	2b9i	A	95.2	100	1	353	-1	-1	-1	P16892-EXP-2b9i_A.pdb
P16892	FUS3_YEAST	YBL016W	3	0	Structure	2f49	B	94.9	100	1	353	-1	-1	-1	P16892-EXP-2f49_B.pdb
P16892	FUS3_YEAST	YBL016W	4	0	Structure	2b9j	A	94.9	100	1	353	-1	-1	-1	P16892-EXP-2b9j_A.pdb
P16892	FUS3_YEAST	YBL016W	5	0	Structure	2b9h	A	94.9	100	1	353	-1	-1	-1	P16892-EXP-2b9h_A.pdb
P16892	FUS3_YEAST	YBL016W	6	0	Structure	2f9g	A	94.1	100	1	353	-1	-1	-1	P16892-EXP-2f9g_A.pdb
P16892	FUS3_YEAST	YBL016W	7	0	Structure	2f49	A	94.9	99.4	3	353	-1	-1	-1	P16892-EXP-2f49_A.pdb
P16892	FUS3_YEAST	YBL016W	8	0	Structure	2fa2	A	94.8	98.9	5	353	-1	-1	-1	P16892-EXP-2fa2_A.pdb
P16892	FUS3_YEAST	YBL016W	9	0	Structure	2fa2	B	94.8	98.6	6	353	-1	-1	-1	P16892-EXP-2fa2_B.pdb
P16892	FUS3_YEAST	YBL016W	10	0	Model	1pme		50	97.4	8	351	1	0	0	P16892-MDL-P16892.8-1pme_.pdb
P16892	FUS3_YEAST	YBL016W	11	0	Model	1ywr	A	47	99.2	4	353	1	0	0	P16892-MDL-P16892.12-1ywr_A.pdb
P16892	FUS3_YEAST	YBL016W	12	0	Model	3coi	A	41	98.6	4	351	1	0	0	P16892-MDL-P16892.16-3coi_A.pdb
P16892	FUS3_YEAST	YBL016W	13	0	Model	3coi	A	39	98.9	3	351	1	1.42	-0.5	P16892-MDL-P16892.19-3coi_A.pdb
P16892	FUS3_YEAST	YBL016W	14	0	Model	1pmn	A	36	98	8	353	1	0	0	P16892-MDL-P16892.10-1pmn_A.pdb
P16892	FUS3_YEAST	YBL016W	15	0	Model	4j1r	A	23	90.9	12	332	0.81	1.118	0.46	P16892-MDL-P16892.13-4j1r_A.pdb
P16892	FUS3_YEAST	YBL016W	16	0	Model	4j71	A	23	90.9	12	332	0.61	1.114	0.44	P16892-MDL-P16892.4-4j71_A.pdb
P39940	RSP5_YEAST	YER125W	1	1	Model	1jmq	A	33	4.9	225	264	0.76	0	0	P39940-MDL-P39940.2-1jmq_A.pdb
P39940	RSP5_YEAST	YER125W	1	2	Structure	3olm	A	98.1	51.9	385	804	-1	-1	-1	P39940-EXP-3olm_A.pdb
P39940	RSP5_YEAST	YER125W	2	1	Model	2oni	A	56	46	430	801	1	1.222	-1.25	P39940-MDL-P39940.21-2oni_A.pdb
P39940	RSP5_YEAST	YER125W	3	1	Model	1nd7	A	52	46	433	804	1	0	0	P39940-MDL-P39940.5-1nd7_A.pdb
P39940	RSP5_YEAST	YER125W	4	1	Model	1nd7	A	52	45.7	434	803	1	0	0	P39940-MDL-P39940.9-1nd7_A.pdb
P39940	RSP5_YEAST	YER125W	5	1	Model	1nd7	A	51	46.1	432	804	1	1.139	-0.95	P39940-MDL-P39940.20-1nd7_A.pdb
P39940	RSP5_YEAST	YER125W	6	1	Model	1zvd	A	51	45.9	432	802	1	1.23	-1.78	P39940-MDL-P39940.1-1zvd_A.pdb
P38074	HMT1_YEAST	YBR034C	1	0	Structure	1g6q	1	99.4	94	22	348	-1	-1	-1	P38074-EXP-1g6q_1.pdb
P38074	HMT1_YEAST	YBR034C	2	0	Structure	1g6q	5	100	92.2	28	348	-1	-1	-1	P38074-EXP-1g6q_5.pdb
P38074	HMT1_YEAST	YBR034C	3	0	Structure	1g6q	6	100	92	29	348	-1	-1	-1	P38074-EXP-1g6q_6.pdb
P38074	HMT1_YEAST	YBR034C	4	0	Structure	1g6q	2	100	92	29	348	-1	-1	-1	P38074-EXP-1g6q_2.pdb
P38074	HMT1_YEAST	YBR034C	5	0	Structure	1g6q	3	100	91.7	30	348	-1	-1	-1	P38074-EXP-1g6q_3.pdb
P38074	HMT1_YEAST	YBR034C	6	0	Structure	1g6q	4	100	91.4	31	348	-1	-1	-1	P38074-EXP-1g6q_4.pdb
P38074	HMT1_YEAST	YBR034C	7	0	Model	1or8	A	50	91.7	29	347	1	0	0	P38074-MDL-P38074.24-1or8_A.pdb
P38074	HMT1_YEAST	YBR034C	8	0	Model	1f3l	A	45	95.7	16	348	1	0	0	P38074-MDL-P38074.18-1f3l_A.pdb
P38074	HMT1_YEAST	YBR034C	9	0	Model	3b3f	A	35	94.5	11	339	1	1.155	-0.54	P38074-MDL-P38074.25-3b3f_A.pdb
P22219	VPS15_YEAST	YBR097W	1	1	Structure	3gre	A	96.2	29.2	1031	1454	-1	-1	-1	P22219-EXP-3gre_A.pdb
P11914	MPPA_YEAST	YHR024C	1	0	Structure	1hr7	A	99.6	94.8	14	470	-1	-1	-1	P11914-EXP-1hr7_A.pdb
P11914	MPPA_YEAST	YHR024C	2	0	Structure	1hr6	A	99.6	94.8	14	470	-1	-1	-1	P11914-EXP-1hr6_A.pdb
P11914	MPPA_YEAST	YHR024C	3	0	Structure	1hr6	G	99.6	94.8	14	470	-1	-1	-1	P11914-EXP-1hr6_G.pdb
P11914	MPPA_YEAST	YHR024C	4	0	Structure	1hr9	A	98.5	94.8	14	470	-1	-1	-1	P11914-EXP-1hr9_A.pdb
P11914	MPPA_YEAST	YHR024C	5	0	Structure	1hr8	A	98.5	94.8	14	470	-1	-1	-1	P11914-EXP-1hr8_A.pdb
P11914	MPPA_YEAST	YHR024C	6	0	Structure	1hr8	G	97.6	94.8	14	470	-1	-1	-1	P11914-EXP-1hr8_G.pdb
P11914	MPPA_YEAST	YHR024C	7	0	Structure	1hr6	E	99.6	94.4	14	468	-1	-1	-1	P11914-EXP-1hr6_E.pdb
P11914	MPPA_YEAST	YHR024C	8	0	Structure	1hr9	G	98.7	94.4	14	468	-1	-1	-1	P11914-EXP-1hr9_G.pdb
P11914	MPPA_YEAST	YHR024C	9	0	Structure	1hr7	E	98	94.4	14	468	-1	-1	-1	P11914-EXP-1hr7_E.pdb
P11914	MPPA_YEAST	YHR024C	10	0	Structure	1hr9	E	97.6	94.4	14	468	-1	-1	-1	P11914-EXP-1hr9_E.pdb
P11914	MPPA_YEAST	YHR024C	11	0	Structure	1hr8	E	97.4	94.4	14	468	-1	-1	-1	P11914-EXP-1hr8_E.pdb
P11914	MPPA_YEAST	YHR024C	12	0	Structure	1hr7	G	98.7	94.2	14	467	-1	-1	-1	P11914-EXP-1hr7_G.pdb
P11914	MPPA_YEAST	YHR024C	13	0	Structure	1hr6	C	99.6	94	16	468	-1	-1	-1	P11914-EXP-1hr6_C.pdb
P11914	MPPA_YEAST	YHR024C	14	0	Structure	1hr8	C	98.5	94	16	468	-1	-1	-1	P11914-EXP-1hr8_C.pdb
P11914	MPPA_YEAST	YHR024C	15	0	Structure	1hr9	C	98.5	94	16	468	-1	-1	-1	P11914-EXP-1hr9_C.pdb
P11914	MPPA_YEAST	YHR024C	16	0	Structure	1hr7	C	97.6	94	16	468	-1	-1	-1	P11914-EXP-1hr7_C.pdb
P11914	MPPA_YEAST	YHR024C	17	0	Model	2g47	A	15	99.2	4	481	1	1.113	0.29	P11914-MDL-P11914.7-2g47_A.pdb
P10507	MPPB_YEAST	YLR163C	1	0	Structure	1hr6	F	99.3	95.9	20	462	-1	-1	-1	P10507-EXP-1hr6_F.pdb
P10507	MPPB_YEAST	YLR163C	2	0	Structure	1hr6	D	99.3	95.9	20	462	-1	-1	-1	P10507-EXP-1hr6_D.pdb
P10507	MPPB_YEAST	YLR163C	3	0	Structure	1hr9	F	99.1	95.9	20	462	-1	-1	-1	P10507-EXP-1hr9_F.pdb
P10507	MPPB_YEAST	YLR163C	4	0	Structure	1hr8	D	99.1	95.9	20	462	-1	-1	-1	P10507-EXP-1hr8_D.pdb
P10507	MPPB_YEAST	YLR163C	5	0	Structure	1hr8	F	99.1	95.9	20	462	-1	-1	-1	P10507-EXP-1hr8_F.pdb
P10507	MPPB_YEAST	YLR163C	6	0	Structure	1hr7	D	99.3	95.5	22	462	-1	-1	-1	P10507-EXP-1hr7_D.pdb
P10507	MPPB_YEAST	YLR163C	7	0	Structure	1hr8	H	99.3	95.5	22	462	-1	-1	-1	P10507-EXP-1hr8_H.pdb
P10507	MPPB_YEAST	YLR163C	8	0	Structure	1hr9	D	99.3	95.5	22	462	-1	-1	-1	P10507-EXP-1hr9_D.pdb
P10507	MPPB_YEAST	YLR163C	9	0	Structure	1hr6	H	99.5	95.2	23	462	-1	-1	-1	P10507-EXP-1hr6_H.pdb
P10507	MPPB_YEAST	YLR163C	10	0	Structure	1hr7	F	99.3	95.2	23	462	-1	-1	-1	P10507-EXP-1hr7_F.pdb
P10507	MPPB_YEAST	YLR163C	11	0	Structure	1hr7	H	99.3	95.2	23	462	-1	-1	-1	P10507-EXP-1hr7_H.pdb
P10507	MPPB_YEAST	YLR163C	12	0	Structure	1hr9	H	99.3	95.2	23	462	-1	-1	-1	P10507-EXP-1hr9_H.pdb
P10507	MPPB_YEAST	YLR163C	13	0	Structure	1hr6	B	99.5	95	24	462	-1	-1	-1	P10507-EXP-1hr6_B.pdb
P10507	MPPB_YEAST	YLR163C	14	0	Structure	1hr9	B	99.3	95	24	462	-1	-1	-1	P10507-EXP-1hr9_B.pdb
P10507	MPPB_YEAST	YLR163C	15	0	Structure	1hr7	B	99.3	95	24	462	-1	-1	-1	P10507-EXP-1hr7_B.pdb
P10507	MPPB_YEAST	YLR163C	16	0	Structure	1hr8	B	99.3	95	24	462	-1	-1	-1	P10507-EXP-1hr8_B.pdb
P10507	MPPB_YEAST	YLR163C	17	0	Model	1bcc	A	39	96.3	16	460	1	0	0	P10507-MDL-P10507.5-1bcc_A.pdb
P10507	MPPB_YEAST	YLR163C	18	0	Model	1bcc	A	39	95.4	22	462	1	0	0	P10507-MDL-P10507.8-1bcc_A.pdb
P10507	MPPB_YEAST	YLR163C	19	0	Model	1qcr	A	36	95.4	22	462	1	0	0	P10507-MDL-P10507.3-1qcr_A.pdb
P10507	MPPB_YEAST	YLR163C	20	0	Model	1bgy	A	36	95.4	22	462	1	0	0	P10507-MDL-P10507.6-1bgy_A.pdb
P25846	MSH1_YEAST	YHR120W	1	0	Model	1wb9	A	33	92.7	70	958	1	1.16	-0.03	P25846-MDL-P25846.6-1wb9_A.pdb
P25846	MSH1_YEAST	YHR120W	2	0	Model	1ewq	A	33	91.8	79	958	1	1.104	0.45	P25846-MDL-P25846.7-1ewq_A.pdb
P32266	MGM1_YEAST	YOR211C	1	1	Model	1jwy	B	39	37	190	515	1	0	0	P32266-MDL-P32266.2-1jwy_B.pdb
P32266	MGM1_YEAST	YOR211C	2	1	Model	1jwy	B	38	0.4	190	515	1	0	0	P32266-MDL-P32266.6-1jwy_B.pdb
P32266	MGM1_YEAST	YOR211C	3	1	Model	1jwy	B	35	0.3	185	471	1	0	0	P32266-MDL-P32266.5-1jwy_B.pdb
Q12117	MRH1_YEAST	YDR033W	1	1	Model	1h2s	A	20	70.3	36	260	0.97	1.2	-2.92	Q12117-MDL-Q12117.9-1h2s_A.pdb
P05030	PMA1_YEAST	YGL008C	1	0	Model	3b8c	A	40	87.5	74	876	1	1.156	1.2	P05030-MDL-P05030.5-3b8c_A.pdb
P05030	PMA1_YEAST	YGL008C	2	0	Model	3b8c	A	39	87.6	71	874	1	1.16	1.18	P05030-MDL-P05030.26-3b8c_A.pdb
P05030	PMA1_YEAST	YGL008C	3	0	Model	3b8c	A	38	88.2	70	879	1	1.187	1.1	P05030-MDL-P05030.14-3b8c_A.pdb
P05030	PMA1_YEAST	YGL008C	4	0	Model	3b8c	A	38	88.1	71	879	1	1.191	1.03	P05030-MDL-P05030.27-3b8c_A.pdb
P05030	PMA1_YEAST	YGL008C	5	0	Model	1wpg	A	26	89.7	69	891	1	1.13	-0.53	P05030-MDL-P05030.16-1wpg_A.pdb
P28737	MSP1_YEAST	YGR028W	1	0	Model	1ypw	A	32	89.2	3	325	1	0	0	P28737-MDL-P28737.2-1ypw_A.pdb
P28737	MSP1_YEAST	YGR028W	2	0	Model	3cf1	A	31	99.4	2	361	1	1.241	0.59	P28737-MDL-P28737.6-3cf1_A.pdb
P28737	MSP1_YEAST	YGR028W	3	0	Model	1e32	A	30	95.9	2	348	1	1.255	-0.01	P28737-MDL-P28737.1-1e32_A.pdb
P28737	MSP1_YEAST	YGR028W	4	1	Model	1e32	A	40	68.8	88	336	1	1.28	-1.39	P28737-MDL-P28737.11-1e32_A.pdb
P28737	MSP1_YEAST	YGR028W	5	1	Model	1ypw	A	34	78.7	74	358	1	0	0	P28737-MDL-P28737.12-1ypw_A.pdb
P28737	MSP1_YEAST	YGR028W	6	1	Model	1e32	A	37	72.4	87	348	1	1.28	-1.31	P28737-MDL-P28737.9-1e32_A.pdb
P28737	MSP1_YEAST	YGR028W	7	1	Model	1e32	A	36	72.7	87	349	1	0	0	P28737-MDL-P28737.4-1e32_A.pdb
P28737	MSP1_YEAST	YGR028W	8	1	Model	1ixz	A	35	64.4	84	316	1	0	0	P28737-MDL-P28737.13-1ixz_A.pdb
P32939	YPT7_YEAST	YML001W	1	0	Structure	1ky2	A	100	86.5	3	182	-1	-1	-1	P32939-EXP-1ky2_A.pdb
P32939	YPT7_YEAST	YML001W	2	0	Structure	1ky3	A	92.6	84.1	7	181	-1	-1	-1	P32939-EXP-1ky3_A.pdb
P32939	YPT7_YEAST	YML001W	3	0	Model	1r2q	A	37	84.1	4	178	1	0	0	P32939-MDL-P32939.16-1r2q_A.pdb
P32939	YPT7_YEAST	YML001W	4	0	Model	2bcg	Y	36	96.2	3	202	1	1.474	-1.11	P32939-MDL-P32939.7-2bcg_Y.pdb
P32939	YPT7_YEAST	YML001W	5	0	Model	1ukv	Y	32	99	3	208	1	0	0	P32939-MDL-P32939.3-1ukv_Y.pdb
P32939	YPT7_YEAST	YML001W	6	0	Model	2x19	A	28	83.2	9	181	1	1.227	-0.76	P32939-MDL-P32939.12-2x19_A.pdb
P32939	YPT7_YEAST	YML001W	7	0	Model	1ftn	A	26	81.2	10	178	1	1.209	-0.91	P32939-MDL-P32939.9-1ftn_A.pdb
P32939	YPT7_YEAST	YML001W	8	0	Model	1lnz	A	19	89.9	4	190	0.87	1.107	-0.41	P32939-MDL-P32939.10-1lnz_A.pdb
P32316	ACH1_YEAST	YBL015W	1	0	Model	2g39	A	47	97.3	8	519	1	1.55	-1.27	P32316-MDL-P32316.7-2g39_A.pdb
P32316	ACH1_YEAST	YBL015W	2	0	Model	2g39	A	47	97.2	8	518	1	1.564	-1.04	P32316-MDL-P32316.3-2g39_A.pdb
P32316	ACH1_YEAST	YBL015W	3	0	Model	2g39	A	47	97	8	517	1	1.591	-1.01	P32316-MDL-P32316.6-2g39_A.pdb
P32316	ACH1_YEAST	YBL015W	4	0	Model	2g39	A	47	97	8	517	1	1.62	-1.36	P32316-MDL-P32316.8-2g39_A.pdb
P32316	ACH1_YEAST	YBL015W	5	0	Model	2g39	A	46	97	9	518	1	1.366	-1.06	P32316-MDL-P32316.4-2g39_A.pdb
P19097	FAS2_YEAST	YPL231W	1	0	Structure	3hmj	A	92.8	99.9	1	1886	-1	-1	-1	P19097-EXP-3hmj_A.pdb
P19097	FAS2_YEAST	YPL231W	2	0	Structure	3hmj	C	92.8	99.9	1	1886	-1	-1	-1	P19097-EXP-3hmj_C.pdb
P19097	FAS2_YEAST	YPL231W	3	0	Structure	3hmj	B	92.8	99.9	1	1886	-1	-1	-1	P19097-EXP-3hmj_B.pdb
P19097	FAS2_YEAST	YPL231W	4	0	Structure	2vkz	C	92.4	92.6	1	1747	-1	-1	-1	P19097-EXP-2vkz_C.pdb
P19097	FAS2_YEAST	YPL231W	5	0	Structure	2vkz	B	92.4	92.6	1	1747	-1	-1	-1	P19097-EXP-2vkz_B.pdb
P19097	FAS2_YEAST	YPL231W	6	0	Structure	2vkz	A	92.4	92.6	1	1747	-1	-1	-1	P19097-EXP-2vkz_A.pdb
P19097	FAS2_YEAST	YPL231W	7	0	Structure	2uv8	A	92.3	92.6	1	1747	-1	-1	-1	P19097-EXP-2uv8_A.pdb
P19097	FAS2_YEAST	YPL231W	8	0	Structure	2uv8	B	92.3	92.6	1	1747	-1	-1	-1	P19097-EXP-2uv8_B.pdb
P19097	FAS2_YEAST	YPL231W	9	0	Structure	2uv8	C	92.3	92.6	1	1747	-1	-1	-1	P19097-EXP-2uv8_C.pdb
P19097	FAS2_YEAST	YPL231W	10	1	Structure	2pff	A	99.5	56.9	671	1744	-1	-1	-1	P19097-EXP-2pff_A.pdb
P19097	FAS2_YEAST	YPL231W	10	2	Structure	2wat	C	100	6.4	1767	1886	-1	-1	-1	P19097-EXP-2wat_C.pdb
P19097	FAS2_YEAST	YPL231W	11	1	Structure	2pff	G	99.5	56.9	671	1744	-1	-1	-1	P19097-EXP-2pff_G.pdb
P19097	FAS2_YEAST	YPL231W	11	2	Structure	2wat	A	100	6.4	1766	1886	-1	-1	-1	P19097-EXP-2wat_A.pdb
P19097	FAS2_YEAST	YPL231W	12	1	Structure	2pff	D	99.5	56.9	671	1744	-1	-1	-1	P19097-EXP-2pff_D.pdb
P19097	FAS2_YEAST	YPL231W	12	2	Structure	2wat	D	100	6.4	1767	1886	-1	-1	-1	P19097-EXP-2wat_D.pdb
P19097	FAS2_YEAST	YPL231W	13	1	Structure	2wat	B	100	6.4	1767	1886	-1	-1	-1	P19097-EXP-2wat_B.pdb
P19097	FAS2_YEAST	YPL231W	14	1	Structure	2wat	E	100	6.4	1767	1886	-1	-1	-1	P19097-EXP-2wat_E.pdb
P19097	FAS2_YEAST	YPL231W	15	1	Structure	2was	B	97.5	6.4	1767	1886	-1	-1	-1	P19097-EXP-2was_B.pdb
P19097	FAS2_YEAST	YPL231W	16	1	Structure	2wat	F	95.8	6.4	1767	1886	-1	-1	-1	P19097-EXP-2wat_F.pdb
P19097	FAS2_YEAST	YPL231W	17	1	Structure	2was	A	94.2	6.4	1767	1886	-1	-1	-1	P19097-EXP-2was_A.pdb
P19097	FAS2_YEAST	YPL231W	18	1	Structure	2was	C	92.4	6.3	1768	1886	-1	-1	-1	P19097-EXP-2was_C.pdb
P19097	FAS2_YEAST	YPL231W	19	1	Structure	2was	D	89.9	6.3	1767	1885	-1	-1	-1	P19097-EXP-2was_D.pdb
P19097	FAS2_YEAST	YPL231W	20	1	Structure	2was	E	88.3	6.4	1767	1886	-1	-1	-1	P19097-EXP-2was_E.pdb
P19097	FAS2_YEAST	YPL231W	21	1	Structure	2was	F	88.2	6.3	1768	1886	-1	-1	-1	P19097-EXP-2was_F.pdb
P40202	CCS1_YEAST	YMR038C	1	0	Structure	1jk9	D	100	97.6	3	245	-1	-1	-1	P40202-EXP-1jk9_D.pdb
P40202	CCS1_YEAST	YMR038C	2	0	Structure	1jk9	B	100	97.6	3	245	-1	-1	-1	P40202-EXP-1jk9_B.pdb
P40202	CCS1_YEAST	YMR038C	3	0	Structure	1qup	A	99.1	88.8	2	222	-1	-1	-1	P40202-EXP-1qup_A.pdb
P40202	CCS1_YEAST	YMR038C	4	0	Structure	1qup	B	99.1	88	5	223	-1	-1	-1	P40202-EXP-1qup_B.pdb
P40202	CCS1_YEAST	YMR038C	5	1	Structure	1ej8	A	100	56.2	78	217	-1	-1	-1	P40202-EXP-1ej8_A.pdb
P00445	SODC_YEAST	YJR104C	1	0	Structure	1sdy	D	100	99.4	2	154	-1	-1	-1	P00445-EXP-1sdy_D.pdb
P00445	SODC_YEAST	YJR104C	2	0	Structure	1sdy	B	100	99.4	2	154	-1	-1	-1	P00445-EXP-1sdy_B.pdb
P00445	SODC_YEAST	YJR104C	3	0	Structure	1f1g	E	100	99.4	2	154	-1	-1	-1	P00445-EXP-1f1g_E.pdb
P00445	SODC_YEAST	YJR104C	4	0	Structure	1b4l	A	100	99.4	2	154	-1	-1	-1	P00445-EXP-1b4l_A.pdb
P00445	SODC_YEAST	YJR104C	5	0	Structure	1yaz	A	100	99.4	2	154	-1	-1	-1	P00445-EXP-1yaz_A.pdb
P00445	SODC_YEAST	YJR104C	6	0	Structure	1sdy	A	100	99.4	2	154	-1	-1	-1	P00445-EXP-1sdy_A.pdb
P00445	SODC_YEAST	YJR104C	7	0	Structure	1f1g	A	100	99.4	2	154	-1	-1	-1	P00445-EXP-1f1g_A.pdb
P00445	SODC_YEAST	YJR104C	8	0	Structure	1f1g	B	100	99.4	2	154	-1	-1	-1	P00445-EXP-1f1g_B.pdb
P00445	SODC_YEAST	YJR104C	9	0	Structure	1jcv	A	100	99.4	2	154	-1	-1	-1	P00445-EXP-1jcv_A.pdb
P00445	SODC_YEAST	YJR104C	10	0	Structure	2jcw	A	100	99.4	2	154	-1	-1	-1	P00445-EXP-2jcw_A.pdb
P00445	SODC_YEAST	YJR104C	11	0	Structure	1f1g	C	100	99.4	2	154	-1	-1	-1	P00445-EXP-1f1g_C.pdb
P00445	SODC_YEAST	YJR104C	12	0	Structure	1f1g	D	100	99.4	2	154	-1	-1	-1	P00445-EXP-1f1g_D.pdb
P00445	SODC_YEAST	YJR104C	13	0	Structure	1f1g	F	100	99.4	2	154	-1	-1	-1	P00445-EXP-1f1g_F.pdb
P00445	SODC_YEAST	YJR104C	14	0	Structure	1yso	A	100	99.4	2	154	-1	-1	-1	P00445-EXP-1yso_A.pdb
P00445	SODC_YEAST	YJR104C	15	0	Structure	1sdy	C	100	99.4	2	154	-1	-1	-1	P00445-EXP-1sdy_C.pdb
P00445	SODC_YEAST	YJR104C	16	0	Structure	1f1a	A	99.3	99.4	2	154	-1	-1	-1	P00445-EXP-1f1a_A.pdb
P00445	SODC_YEAST	YJR104C	17	0	Structure	1jk9	A	99.3	99.4	2	154	-1	-1	-1	P00445-EXP-1jk9_A.pdb
P00445	SODC_YEAST	YJR104C	18	0	Structure	1b4t	A	99.3	99.4	2	154	-1	-1	-1	P00445-EXP-1b4t_A.pdb
P00445	SODC_YEAST	YJR104C	19	0	Structure	1f18	A	99.3	99.4	2	154	-1	-1	-1	P00445-EXP-1f18_A.pdb
P00445	SODC_YEAST	YJR104C	20	0	Structure	1jk9	C	99.3	99.4	2	154	-1	-1	-1	P00445-EXP-1jk9_C.pdb
P00445	SODC_YEAST	YJR104C	21	0	Structure	1f1d	A	99.3	99.4	2	154	-1	-1	-1	P00445-EXP-1f1d_A.pdb
P00445	SODC_YEAST	YJR104C	22	0	Model	2jlp	A	38	100	1	154	1	1.411	-1.09	P00445-MDL-P00445.2-2jlp_A.pdb
P14832	CYPH_YEAST	YDR155C	1	0	Structure	1ist	A	100	99.4	2	162	-1	-1	-1	P14832-EXP-1ist_A.pdb
P14832	CYPH_YEAST	YDR155C	2	0	Structure	1ist	B	100	99.4	2	162	-1	-1	-1	P14832-EXP-1ist_B.pdb
P14832	CYPH_YEAST	YDR155C	3	0	Structure	1vdn	A	100	99.4	2	162	-1	-1	-1	P14832-EXP-1vdn_A.pdb
P14832	CYPH_YEAST	YDR155C	4	0	Model	1h0p	A	59	100	1	162	1	0	0	P14832-MDL-P14832.3-1h0p_A.pdb
P14832	CYPH_YEAST	YDR155C	5	0	Model	2c3b	A	55	100	1	162	1	1.321	0.2	P14832-MDL-P14832.1-2c3b_A.pdb
P15424	MS116_YEAST	YDR194C	1	1	Structure	3i62	A	100	76.7	88	596	-1	-1	-1	P15424-EXP-3i62_A.pdb
P15424	MS116_YEAST	YDR194C	2	1	Structure	3i61	A	100	76.7	88	596	-1	-1	-1	P15424-EXP-3i61_A.pdb
P15424	MS116_YEAST	YDR194C	3	1	Structure	3i5y	A	100	76.7	88	596	-1	-1	-1	P15424-EXP-3i5y_A.pdb
P15424	MS116_YEAST	YDR194C	4	1	Structure	3i5x	A	100	76.7	88	596	-1	-1	-1	P15424-EXP-3i5x_A.pdb
P15424	MS116_YEAST	YDR194C	5	1	Structure	3sqw	A	100	76.5	88	595	-1	-1	-1	P15424-EXP-3sqw_A.pdb
P15424	MS116_YEAST	YDR194C	6	1	Structure	3sqx	A	100	76.5	88	595	-1	-1	-1	P15424-EXP-3sqx_A.pdb
P15424	MS116_YEAST	YDR194C	7	1	Model	1hv8	A	30	59.8	107	503	1	0	0	P15424-MDL-P15424.15-1hv8_A.pdb
P15424	MS116_YEAST	YDR194C	7	2	Structure	4db2	C	100	38.6	342	597	-1	-1	-1	P15424-EXP-4db2_C.pdb
P15424	MS116_YEAST	YDR194C	8	1	Structure	4db2	A	100	38.4	342	596	-1	-1	-1	P15424-EXP-4db2_A.pdb
P15424	MS116_YEAST	YDR194C	9	1	Structure	4db4	B	100	38.4	342	596	-1	-1	-1	P15424-EXP-4db4_B.pdb
P15424	MS116_YEAST	YDR194C	10	1	Structure	4db2	B	100	38.4	342	596	-1	-1	-1	P15424-EXP-4db2_B.pdb
P15424	MS116_YEAST	YDR194C	11	1	Structure	4db4	A	100	38.4	342	596	-1	-1	-1	P15424-EXP-4db4_A.pdb
P15424	MS116_YEAST	YDR194C	12	1	Structure	4db2	D	92.6	38.6	342	597	-1	-1	-1	P15424-EXP-4db2_D.pdb
Q12480	ETFA_YEAST	YPR004C	1	0	Model	2a1t	R	48	93.3	22	342	1	1.516	-0.39	Q12480-MDL-Q12480.5-2a1t_R.pdb
Q12480	ETFA_YEAST	YPR004C	2	0	Model	1efv	A	48	92.7	23	341	1	1.58	-1.08	Q12480-MDL-Q12480.6-1efv_A.pdb
Q12480	ETFA_YEAST	YPR004C	3	0	Model	1efp	A	47	92.2	24	340	1	0	0	Q12480-MDL-Q12480.3-1efp_A.pdb
Q12480	ETFA_YEAST	YPR004C	4	0	Model	2a1t	R	45	93.9	21	343	1	1.483	-0.44	Q12480-MDL-Q12480.7-2a1t_R.pdb
Q12480	ETFA_YEAST	YPR004C	5	0	Model	1efv	A	45	92.7	23	341	1	0	0	Q12480-MDL-Q12480.1-1efv_A.pdb
P42940	ETFB_YEAST	YGR207C	1	0	Model	1efp	B	51	95.4	7	255	1	1.57	-0.48	P42940-MDL-P42940.1-1efp_B.pdb
P42940	ETFB_YEAST	YGR207C	2	0	Model	1efp	B	51	95.4	7	255	1	1.549	-0.25	P42940-MDL-P42940.8-1efp_B.pdb
P42940	ETFB_YEAST	YGR207C	3	0	Model	1efp	B	50	95.4	7	255	1	0	0	P42940-MDL-P42940.3-1efp_B.pdb
P42940	ETFB_YEAST	YGR207C	4	0	Model	1t9g	S	49	88.5	7	237	1	1.495	-0.6	P42940-MDL-P42940.9-1t9g_S.pdb
P42940	ETFB_YEAST	YGR207C	5	0	Model	2a1u	B	48	97.7	7	261	1	1.525	-0.28	P42940-MDL-P42940.10-2a1u_B.pdb
P42940	ETFB_YEAST	YGR207C	6	0	Model	1efv	B	48	97.7	7	261	1	1.6	-0.76	P42940-MDL-P42940.5-1efv_B.pdb
P42940	ETFB_YEAST	YGR207C	7	0	Model	1efv	B	48	97.7	7	261	1	0	0	P42940-MDL-P42940.6-1efv_B.pdb
P42940	ETFB_YEAST	YGR207C	8	0	Model	1efv	B	48	97.7	7	261	1	0	0	P42940-MDL-P42940.4-1efv_B.pdb
P42940	ETFB_YEAST	YGR207C	9	0	Model	2a1u	B	47	97.7	7	261	1	1.566	-0.49	P42940-MDL-P42940.2-2a1u_B.pdb
P38989	SMC2_YEAST	YFR031C	1	1	Model	1xew	X	38	14.4	2	169	1	0	0	P38989-MDL-P38989.8-1xew_X.pdb
P38989	SMC2_YEAST	YFR031C	1	2	Model	1gxj	A	30	12.6	523	669	1	0	0	P38989-MDL-P38989.7-1gxj_A.pdb
P38989	SMC2_YEAST	YFR031C	1	3	Model	1xew	Y	35	12.1	1029	1169	0.97	0	0	P38989-MDL-P38989.21-1xew_Y.pdb
P46367	ALDH4_YEAST	YOR374W	1	0	Model	1o04	A	52	91.1	47	519	1	1.7	-1.78	P46367-MDL-P46367.23-1o04_A.pdb
P46367	ALDH4_YEAST	YOR374W	2	0	Model	1o02	A	52	91.1	47	519	1	1.647	-1.21	P46367-MDL-P46367.22-1o02_A.pdb
P46367	ALDH4_YEAST	YOR374W	3	0	Model	1bi9	A	49	94.8	28	519	1	0	0	P46367-MDL-P46367.27-1bi9_A.pdb
P46367	ALDH4_YEAST	YOR374W	4	0	Model	1bxs	A	49	94.2	31	519	1	0	0	P46367-MDL-P46367.1-1bxs_A.pdb
P46367	ALDH4_YEAST	YOR374W	5	0	Model	3r31	A	42	91.5	39	513	1	1.465	-0.69	P46367-MDL-P46367.26-3r31_A.pdb
P46367	ALDH4_YEAST	YOR374W	6	0	Model	2d4e	A	38	97.1	16	519	1	1.405	-0.65	P46367-MDL-P46367.4-2d4e_A.pdb
P46367	ALDH4_YEAST	YOR374W	7	0	Model	1a4s	A	37	93.6	28	513	1	0	0	P46367-MDL-P46367.25-1a4s_A.pdb
P46367	ALDH4_YEAST	YOR374W	8	0	Model	3u4j	A	36	92.7	39	519	1	1.488	-1.07	P46367-MDL-P46367.11-3u4j_A.pdb
P46367	ALDH4_YEAST	YOR374W	9	0	Model	4dal	A	36	90.6	44	513	1	1.428	-0.77	P46367-MDL-P46367.18-4dal_A.pdb
P46367	ALDH4_YEAST	YOR374W	10	0	Model	3k2w	A	36	89.8	48	513	1	1.391	-0.7	P46367-MDL-P46367.9-3k2w_A.pdb
P46367	ALDH4_YEAST	YOR374W	11	0	Model	3rhd	A	36	86.9	63	513	1	1.366	-0.75	P46367-MDL-P46367.10-3rhd_A.pdb
P46367	ALDH4_YEAST	YOR374W	12	0	Model	3pqa	A	35	87.7	59	513	1	1.336	-0.67	P46367-MDL-P46367.28-3pqa_A.pdb
P46367	ALDH4_YEAST	YOR374W	13	0	Model	3rhh	A	35	86.1	50	496	1	1.312	-0.49	P46367-MDL-P46367.16-3rhh_A.pdb
P46367	ALDH4_YEAST	YOR374W	14	0	Model	3qan	A	34	95.4	19	513	1	1.364	-0.58	P46367-MDL-P46367.15-3qan_A.pdb
P46367	ALDH4_YEAST	YOR374W	15	0	Model	4f3x	A	34	90.8	43	513	1	1.412	-0.71	P46367-MDL-P46367.24-4f3x_A.pdb
P46367	ALDH4_YEAST	YOR374W	16	0	Model	3rjl	A	33	92.7	33	513	1	1.376	-0.77	P46367-MDL-P46367.19-3rjl_A.pdb
P46367	ALDH4_YEAST	YOR374W	17	0	Model	3r64	A	33	87.7	43	497	1	1.319	-0.58	P46367-MDL-P46367.20-3r64_A.pdb
P46367	ALDH4_YEAST	YOR374W	18	0	Model	3prl	A	32	90.4	45	513	1	1.361	-0.94	P46367-MDL-P46367.29-3prl_A.pdb
P46367	ALDH4_YEAST	YOR374W	19	0	Model	1uzb	A	31	95.4	23	517	1	0	0	P46367-MDL-P46367.14-1uzb_A.pdb
P46367	ALDH4_YEAST	YOR374W	20	0	Model	3ros	A	30	87.3	61	513	1	1.305	-0.67	P46367-MDL-P46367.13-3ros_A.pdb
P46367	ALDH4_YEAST	YOR374W	21	0	Model	4dng	A	29	85.4	39	481	1	1.264	-0.48	P46367-MDL-P46367.21-4dng_A.pdb
P40495	LYS12_YEAST	YIL094C	1	0	Model	1x0l	A	52	93.3	26	371	1	1.57	-0.97	P40495-MDL-P40495.12-1x0l_A.pdb
P40495	LYS12_YEAST	YIL094C	2	0	Model	1x0l	A	52	93.3	26	371	1	1.556	-0.8	P40495-MDL-P40495.4-1x0l_A.pdb
P40495	LYS12_YEAST	YIL094C	3	0	Model	1x0l	A	51	94.1	23	371	1	1.581	-1	P40495-MDL-P40495.2-1x0l_A.pdb
P40495	LYS12_YEAST	YIL094C	4	0	Model	1x0l	A	50	93.8	24	371	1	1.573	-1.15	P40495-MDL-P40495.5-1x0l_A.pdb
P40495	LYS12_YEAST	YIL094C	5	0	Model	1x0l	A	50	93.8	24	371	1	1.6	-1.36	P40495-MDL-P40495.1-1x0l_A.pdb
P40495	LYS12_YEAST	YIL094C	6	0	Model	2ayq	A	37	94.1	23	371	1	0	0	P40495-MDL-P40495.8-2ayq_A.pdb
P40495	LYS12_YEAST	YIL094C	7	0	Model	1cnz	A	35	94.6	21	371	1	0	0	P40495-MDL-P40495.3-1cnz_A.pdb
P40495	LYS12_YEAST	YIL094C	8	0	Model	1cnz	A	35	94.3	22	371	1	0	0	P40495-MDL-P40495.7-1cnz_A.pdb
P34227	PRX1_YEAST	YBL064C	1	0	Model	1prx	A	50	80.5	49	258	1	1.456	-1.1	P34227-MDL-P34227.3-1prx_A.pdb
P34227	PRX1_YEAST	YBL064C	2	0	Model	1prx	A	50	80.5	49	258	1	1.49	-1.4	P34227-MDL-P34227.11-1prx_A.pdb
P34227	PRX1_YEAST	YBL064C	3	0	Model	1prx	A	49	80.8	49	259	1	0	0	P34227-MDL-P34227.1-1prx_A.pdb
P34227	PRX1_YEAST	YBL064C	4	0	Model	1prx	A	48	80.8	49	259	1	0	0	P34227-MDL-P34227.15-1prx_A.pdb
P34227	PRX1_YEAST	YBL064C	5	0	Model	2v2g	A	47	82	48	261	1	1.387	-1.13	P34227-MDL-P34227.7-2v2g_A.pdb
P34227	PRX1_YEAST	YBL064C	6	1	Model	1qmv	A	31	75.9	49	246	1	0	0	P34227-MDL-P34227.21-1qmv_A.pdb
P39525	CEM1_YEAST	YER061C	1	0	Model	1e5m	A	38	99.1	3	440	1	0	0	P39525-MDL-P39525.1-1e5m_A.pdb
P38825	TOM71_YEAST	YHR117W	1	0	Structure	3fp3	A	96	81.2	109	627	-1	-1	-1	P38825-EXP-3fp3_A.pdb
P38825	TOM71_YEAST	YHR117W	2	0	Structure	3lca	A	93.8	80.4	124	637	-1	-1	-1	P38825-EXP-3lca_A.pdb
P38825	TOM71_YEAST	YHR117W	3	1	Structure	3fp4	A	94.7	79.8	109	618	-1	-1	-1	P38825-EXP-3fp4_A.pdb
P38825	TOM71_YEAST	YHR117W	4	1	Structure	3fp2	A	94.7	79.8	110	619	-1	-1	-1	P38825-EXP-3fp2_A.pdb
P38825	TOM71_YEAST	YHR117W	5	1	Model	2gw1	A	58	79.5	122	629	1	1.52	-0.94	P38825-MDL-P38825.8-2gw1_A.pdb
P38825	TOM71_YEAST	YHR117W	6	1	Model	2gw1	A	58	79.5	122	629	1	1.446	-0.19	P38825-MDL-P38825.5-2gw1_A.pdb
P60010	ACT_YEAST	YFL039C	1	0	Structure	1yag	A	100	99.2	4	375	-1	-1	-1	P60010-EXP-1yag_A.pdb
P60010	ACT_YEAST	YFL039C	2	0	Structure	1yvn	A	99.7	99.2	4	375	-1	-1	-1	P60010-EXP-1yvn_A.pdb
P60010	ACT_YEAST	YFL039C	3	0	Structure	3b63	I	100	97.3	6	370	-1	-1	-1	P60010-EXP-3b63_I.pdb
P60010	ACT_YEAST	YFL039C	4	0	Structure	3b63	C	100	97.3	6	370	-1	-1	-1	P60010-EXP-3b63_C.pdb
P60010	ACT_YEAST	YFL039C	5	0	Model	1d4x	A	89	99.2	4	375	1	0	0	P60010-MDL-P60010.1-1d4x_A.pdb
P60010	ACT_YEAST	YFL039C	6	0	Model	2asm	A	88	98.4	7	375	1	2.088	-1.49	P60010-MDL-P60010.4-2asm_A.pdb
P60010	ACT_YEAST	YFL039C	7	0	Model	1c0g	A	86	99.7	2	375	1	0	0	P60010-MDL-P60010.2-1c0g_A.pdb
P60010	ACT_YEAST	YFL039C	8	0	Model	2p9p	A	37	99.5	3	375	1	1.237	-0.47	P60010-MDL-P60010.5-2p9p_A.pdb
P43603	LSB3_YEAST	YFR024C-A	1	1	Structure	1ssh	A	100	12.9	401	459	-1	-1	-1	P43603-EXP-1ssh_A.pdb
P43603	LSB3_YEAST	YFR024C-A	2	1	Structure	1oot	A	100	12.6	402	459	-1	-1	-1	P43603-EXP-1oot_A.pdb
P43603	LSB3_YEAST	YFR024C-A	3	1	Model	1udl	A	30	0.2	366	458	1	0	0	P43603-MDL-P43603.7-1udl_A.pdb
P43603	LSB3_YEAST	YFR024C-A	4	1	Model	1udl	A	30	0.2	371	459	1	0	0	P43603-MDL-P43603.9-1udl_A.pdb
P25694	CDC48_YEAST	YDL126C	1	0	Model	3cf1	A	74	90.3	32	785	1	1.69	-0.09	P25694-MDL-P25694.1-3cf1_A.pdb
P25694	CDC48_YEAST	YDL126C	2	0	Model	1oz4	A	74	89.7	37	785	1	0	0	P25694-MDL-P25694.9-1oz4_A.pdb
P25694	CDC48_YEAST	YDL126C	3	0	Model	1ypw	A	74	88.3	27	763	1	0	0	P25694-MDL-P25694.7-1ypw_A.pdb
P25694	CDC48_YEAST	YDL126C	4	0	Model	1ypw	A	74	83.8	27	726	1	1.66	-0.05	P25694-MDL-P25694.5-1ypw_A.pdb
P25694	CDC48_YEAST	YDL126C	5	1	Model	1e32	A	77	52.1	32	466	1	1.457	-0.77	P25694-MDL-P25694.4-1e32_A.pdb
P25694	CDC48_YEAST	YDL126C	6	1	Model	1e32	A	78	46	32	415	1	1.46	-1.28	P25694-MDL-P25694.6-1e32_A.pdb
P38122	PANB_YEAST	YBR176W	1	0	Model	1o68	B	39	88.1	21	295	1	1.218	-0.88	P38122-MDL-P38122.1-1o68_B.pdb
P38122	PANB_YEAST	YBR176W	2	0	Model	1o68	B	38	86.5	26	295	1	1.414	-1.16	P38122-MDL-P38122.11-1o68_B.pdb
P38122	PANB_YEAST	YBR176W	3	0	Model	1o66	A	38	85.6	22	288	1	1.32	-0.86	P38122-MDL-P38122.7-1o66_A.pdb
P38122	PANB_YEAST	YBR176W	4	0	Model	1m3u	F	36	86.2	27	295	1	0	0	P38122-MDL-P38122.9-1m3u_F.pdb
P38122	PANB_YEAST	YBR176W	5	0	Model	1m3u	A	35	87.2	25	296	1	0	0	P38122-MDL-P38122.8-1m3u_A.pdb
P38122	PANB_YEAST	YBR176W	6	0	Model	1m3u	A	35	86.5	26	295	1	1.397	-1.29	P38122-MDL-P38122.6-1m3u_A.pdb
P38122	PANB_YEAST	YBR176W	7	0	Model	1m3u	A	35	86.5	26	295	1	1.43	-1.61	P38122-MDL-P38122.10-1m3u_A.pdb
P14020	DPM1_YEAST	YPR183W	1	0	Model	3ckj	A	18	94	2	252	0.99	1.123	-0.06	P14020-MDL-P14020.13-3ckj_A.pdb
P14020	DPM1_YEAST	YPR183W	2	0	Model	3ckj	A	17	96.2	4	260	0.97	1.118	0.06	P14020-MDL-P14020.11-3ckj_A.pdb
P25039	EFGM_YEAST	YLR069C	1	0	Model	1dar	A	46	89.8	69	751	1	1.304	0.12	P25039-MDL-P25039.6-1dar_A.pdb
P25039	EFGM_YEAST	YLR069C	2	0	Model	2bm0	A	45	90.3	66	752	1	1.45	-0.68	P25039-MDL-P25039.9-2bm0_A.pdb
P25039	EFGM_YEAST	YLR069C	3	0	Model	2bm0	A	45	89.9	68	751	1	1.425	-0.33	P25039-MDL-P25039.8-2bm0_A.pdb
P25039	EFGM_YEAST	YLR069C	4	0	Model	2bm0	A	45	89.8	69	751	1	1.46	-0.77	P25039-MDL-P25039.11-2bm0_A.pdb
P48525	SYEM_YEAST	YOL033W	1	0	Model	1j09	A	36	90.3	45	528	1	1.38	-0.95	P48525-MDL-P48525.1-1j09_A.pdb
P48525	SYEM_YEAST	YOL033W	2	0	Model	1j09	A	35	90.5	45	529	1	0	0	P48525-MDL-P48525.8-1j09_A.pdb
P48525	SYEM_YEAST	YOL033W	3	0	Model	1j09	A	35	90.3	45	528	1	0	0	P48525-MDL-P48525.9-1j09_A.pdb
P48525	SYEM_YEAST	YOL033W	4	0	Model	2cfo	A	33	91.2	44	532	1	1.327	-0.42	P48525-MDL-P48525.3-2cfo_A.pdb
P48525	SYEM_YEAST	YOL033W	5	0	Model	2cfo	A	32	91.6	44	534	1	1.261	-0.45	P48525-MDL-P48525.6-2cfo_A.pdb
Q12287	COX17_YEAST	YLL009C	1	0	Structure	1u97	A	100	100	1	69	-1	-1	-1	Q12287-EXP-1u97_A.pdb
Q12287	COX17_YEAST	YLL009C	2	0	Structure	1u96	A	100	100	1	69	-1	-1	-1	Q12287-EXP-1u96_A.pdb
Q12287	COX17_YEAST	YLL009C	3	0	Structure	1z2g	A	100	100	1	69	-1	-1	-1	Q12287-EXP-1z2g_A.pdb
P36046	MIA40_YEAST	YKL195W	1	1	Structure	2zxt	A	73.3	26.1	249	353	-1	-1	-1	P36046-EXP-2zxt_A.pdb
P36046	MIA40_YEAST	YKL195W	2	1	Structure	3a3c	A	71.4	26.1	249	353	-1	-1	-1	P36046-EXP-3a3c_A.pdb
P34222	PTH2_YEAST	YBL057C	1	1	Model	1q7s	A	53	0.6	86	208	1	1.252	-1.05	P34222-MDL-P34222.2-1q7s_A.pdb
P34222	PTH2_YEAST	YBL057C	2	1	Model	1q7s	A	53	0.6	86	208	1	0	0	P34222-MDL-P34222.6-1q7s_A.pdb
P34222	PTH2_YEAST	YBL057C	3	1	Model	1q7s	A	53	0.6	86	208	1	1.31	-1.64	P34222-MDL-P34222.4-1q7s_A.pdb
P34222	PTH2_YEAST	YBL057C	4	1	Model	1q7s	A	53	0.6	86	208	1	0	0	P34222-MDL-P34222.5-1q7s_A.pdb
P34222	PTH2_YEAST	YBL057C	5	1	Model	1rlk	A	39	0.6	88	207	1	0	0	P34222-MDL-P34222.3-1rlk_A.pdb
P32628	RAD23_YEAST	YEL037C	1	0	Model	1qze	A	42	99.5	1	396	1	0	0	P32628-MDL-P32628.9-1qze_A.pdb
P32628	RAD23_YEAST	YEL037C	2	0	Model	1qze	A	42	99.5	1	396	0.99	0	0	P32628-MDL-P32628.6-1qze_A.pdb
P32628	RAD23_YEAST	YEL037C	3	0	Model	1oqy	A	36	99.2	4	398	1	0	0	P32628-MDL-P32628.7-1oqy_A.pdb
P32628	RAD23_YEAST	YEL037C	4	0	Model	1oqy	A	34	99.2	4	398	1	0	0	P32628-MDL-P32628.8-1oqy_A.pdb
P32628	RAD23_YEAST	YEL037C	5	1	Structure	3m62	B	100	18.1	3	74	-1	-1	-1	P32628-EXP-3m62_B.pdb
P32628	RAD23_YEAST	YEL037C	5	2	Structure	2qsf	X	73.8	35.4	255	395	-1	-1	-1	P32628-EXP-2qsf_X.pdb
P32628	RAD23_YEAST	YEL037C	6	1	Structure	1x3z	B	100	14.3	253	309	-1	-1	-1	P32628-EXP-1x3z_B.pdb
P32628	RAD23_YEAST	YEL037C	7	1	Structure	1x3w	B	96.5	14.3	253	309	-1	-1	-1	P32628-EXP-1x3w_B.pdb
P32628	RAD23_YEAST	YEL037C	8	1	Structure	3esw	B	100	13.8	254	308	-1	-1	-1	P32628-EXP-3esw_B.pdb
P32628	RAD23_YEAST	YEL037C	9	1	Structure	2qsh	X	100	13.6	256	309	-1	-1	-1	P32628-EXP-2qsh_X.pdb
P32628	RAD23_YEAST	YEL037C	10	1	Structure	2qsg	X	100	13.6	256	309	-1	-1	-1	P32628-EXP-2qsg_X.pdb
P17695	GLRX2_YEAST	YDR513W	1	0	Model	2jad	A	51	97.9	2	141	1	1.609	-0.29	P17695-MDL-P17695.4-2jad_A.pdb
P17695	GLRX2_YEAST	YDR513W	2	1	Structure	3d4m	A	100	76.2	35	143	-1	-1	-1	P17695-EXP-3d4m_A.pdb
P17695	GLRX2_YEAST	YDR513W	3	1	Structure	3d5j	A	99.1	76.2	35	143	-1	-1	-1	P17695-EXP-3d5j_A.pdb
P17695	GLRX2_YEAST	YDR513W	4	1	Structure	3ctg	A	100	75.5	36	143	-1	-1	-1	P17695-EXP-3ctg_A.pdb
P17695	GLRX2_YEAST	YDR513W	5	1	Structure	3ctf	A	100	75.5	36	143	-1	-1	-1	P17695-EXP-3ctf_A.pdb
P17695	GLRX2_YEAST	YDR513W	6	1	Structure	3d5j	B	99.1	74.8	36	142	-1	-1	-1	P17695-EXP-3d5j_B.pdb
P17695	GLRX2_YEAST	YDR513W	7	1	Model	1z7p	A	36	77.6	31	141	1	1.34	-1.48	P17695-MDL-P17695.6-1z7p_A.pdb
P17695	GLRX2_YEAST	YDR513W	8	1	Model	1z7p	A	41	66.4	45	139	1	1.25	-1.23	P17695-MDL-P17695.2-1z7p_A.pdb
P17695	GLRX2_YEAST	YDR513W	9	1	Model	1kte		35	69.9	42	141	1	0	0	P17695-MDL-P17695.3-1kte_.pdb
P17695	GLRX2_YEAST	YDR513W	10	1	Model	1kte		35	0.7	42	139	1	0	0	P17695-MDL-P17695.10-1kte_.pdb
Q99258	RIB3_YEAST	YDR487C	1	0	Model	1tks	A	61	100	1	208	1	1.79	-1.57	Q99258-MDL-Q99258.1-1tks_A.pdb
Q99258	RIB3_YEAST	YDR487C	2	0	Model	2ris	A	61	100	1	208	1	1.789	-1.47	Q99258-MDL-Q99258.2-2ris_A.pdb
Q99258	RIB3_YEAST	YDR487C	3	0	Model	1tks	A	61	100	1	208	1	1.8	-1.57	Q99258-MDL-Q99258.5-1tks_A.pdb
Q99258	RIB3_YEAST	YDR487C	4	0	Model	1tks	A	61	100	1	208	1	0	0	Q99258-MDL-Q99258.4-1tks_A.pdb
Q99258	RIB3_YEAST	YDR487C	5	0	Model	1g57	A	45	99.5	2	208	1	0	0	Q99258-MDL-Q99258.3-1g57_A.pdb
P48570	HOSC_YEAST	YDL182W	1	1	Model	3eeg	A	31	62.4	22	288	1	0	0	P48570-MDL-P48570.22-3eeg_A.pdb
Q12425	ISA2_YEAST	YPR067W	1	1	Model	1r94	A	34	60.5	57	168	1	0	0	Q12425-MDL-Q12425.6-1r94_A.pdb
P38920	MLH1_YEAST	YMR167W	1	1	Model	1b63	A	33	43.3	3	335	1	0	0	P38920-MDL-P38920.2-1b63_A.pdb
P38920	MLH1_YEAST	YMR167W	1	2	Structure	4fmn	A	100	34.5	505	769	-1	-1	-1	P38920-EXP-4fmn_A.pdb
P38920	MLH1_YEAST	YMR167W	2	1	Model	1b63	A	33	43	4	334	1	0	0	P38920-MDL-P38920.10-1b63_A.pdb
P38920	MLH1_YEAST	YMR167W	2	2	Structure	4fmo	A	100	34.3	506	769	-1	-1	-1	P38920-EXP-4fmo_A.pdb
P38920	MLH1_YEAST	YMR167W	3	1	Structure	4e4w	A	100	33.9	509	769	-1	-1	-1	P38920-EXP-4e4w_A.pdb
Q08214	NTG2_YEAST	YOL043C	1	1	Structure	4fmn	C	100	1.8	22	28	-1	-1	-1	Q08214-EXP-4fmn_C.pdb
P00924	ENO1_YEAST	YGR254W	1	0	Structure	2al1	A	99.8	99.8	2	437	-1	-1	-1	P00924-EXP-2al1_A.pdb
P00924	ENO1_YEAST	YGR254W	2	0	Structure	1one	A	99.8	99.8	2	437	-1	-1	-1	P00924-EXP-1one_A.pdb
P00924	ENO1_YEAST	YGR254W	3	0	Structure	1ebh	A	99.8	99.8	2	437	-1	-1	-1	P00924-EXP-1ebh_A.pdb
P00924	ENO1_YEAST	YGR254W	4	0	Structure	2one	B	99.8	99.8	2	437	-1	-1	-1	P00924-EXP-2one_B.pdb
P00924	ENO1_YEAST	YGR254W	5	0	Structure	2xh7	B	99.8	99.8	2	437	-1	-1	-1	P00924-EXP-2xh7_B.pdb
P00924	ENO1_YEAST	YGR254W	6	0	Structure	1one	B	99.8	99.8	2	437	-1	-1	-1	P00924-EXP-1one_B.pdb
P00924	ENO1_YEAST	YGR254W	7	0	Structure	1ebh	B	99.8	99.8	2	437	-1	-1	-1	P00924-EXP-1ebh_B.pdb
P00924	ENO1_YEAST	YGR254W	8	0	Structure	2one	A	99.8	99.8	2	437	-1	-1	-1	P00924-EXP-2one_A.pdb
P00924	ENO1_YEAST	YGR254W	9	0	Structure	1ebg	A	99.8	99.8	2	437	-1	-1	-1	P00924-EXP-1ebg_A.pdb
P00924	ENO1_YEAST	YGR254W	10	0	Structure	1ebg	B	99.8	99.8	2	437	-1	-1	-1	P00924-EXP-1ebg_B.pdb
P00924	ENO1_YEAST	YGR254W	11	0	Structure	2xh2	C	99.5	99.8	2	437	-1	-1	-1	P00924-EXP-2xh2_C.pdb
P00924	ENO1_YEAST	YGR254W	12	0	Structure	2xh4	A	99.5	99.8	2	437	-1	-1	-1	P00924-EXP-2xh4_A.pdb
P00924	ENO1_YEAST	YGR254W	13	0	Structure	1l8p	B	99.5	99.8	2	437	-1	-1	-1	P00924-EXP-1l8p_B.pdb
P00924	ENO1_YEAST	YGR254W	14	0	Structure	5enl	A	99.5	99.8	2	437	-1	-1	-1	P00924-EXP-5enl_A.pdb
P00924	ENO1_YEAST	YGR254W	15	0	Structure	2xgz	A	99.5	99.8	2	437	-1	-1	-1	P00924-EXP-2xgz_A.pdb
P00924	ENO1_YEAST	YGR254W	16	0	Structure	1p48	A	99.5	99.8	2	437	-1	-1	-1	P00924-EXP-1p48_A.pdb
P00924	ENO1_YEAST	YGR254W	17	0	Structure	1l8p	A	99.5	99.8	2	437	-1	-1	-1	P00924-EXP-1l8p_A.pdb
P00924	ENO1_YEAST	YGR254W	18	0	Structure	3enl	A	99.5	99.8	2	437	-1	-1	-1	P00924-EXP-3enl_A.pdb
P00924	ENO1_YEAST	YGR254W	19	0	Structure	2xh2	A	99.5	99.8	2	437	-1	-1	-1	P00924-EXP-2xh2_A.pdb
P00924	ENO1_YEAST	YGR254W	20	0	Structure	1nel	A	99.5	99.8	2	437	-1	-1	-1	P00924-EXP-1nel_A.pdb
P00924	ENO1_YEAST	YGR254W	21	0	Structure	1l8p	C	99.5	99.8	2	437	-1	-1	-1	P00924-EXP-1l8p_C.pdb
P00924	ENO1_YEAST	YGR254W	22	0	Structure	2al2	A	99.5	99.8	2	437	-1	-1	-1	P00924-EXP-2al2_A.pdb
P00924	ENO1_YEAST	YGR254W	23	0	Structure	2xh2	D	99.5	99.8	2	437	-1	-1	-1	P00924-EXP-2xh2_D.pdb
P00924	ENO1_YEAST	YGR254W	24	0	Structure	4enl	A	99.5	99.8	2	437	-1	-1	-1	P00924-EXP-4enl_A.pdb
P00924	ENO1_YEAST	YGR254W	25	0	Structure	1els	A	99.5	99.8	2	437	-1	-1	-1	P00924-EXP-1els_A.pdb
P00924	ENO1_YEAST	YGR254W	26	0	Structure	7enl	A	99.5	99.8	2	437	-1	-1	-1	P00924-EXP-7enl_A.pdb
P00924	ENO1_YEAST	YGR254W	27	0	Structure	2xh7	A	99.5	99.8	2	437	-1	-1	-1	P00924-EXP-2xh7_A.pdb
P00924	ENO1_YEAST	YGR254W	28	0	Structure	1p48	B	99.5	99.8	2	437	-1	-1	-1	P00924-EXP-1p48_B.pdb
P00924	ENO1_YEAST	YGR254W	29	0	Structure	6enl	A	99.5	99.8	2	437	-1	-1	-1	P00924-EXP-6enl_A.pdb
P00924	ENO1_YEAST	YGR254W	30	0	Structure	2xh4	C	99.5	99.8	2	437	-1	-1	-1	P00924-EXP-2xh4_C.pdb
P00924	ENO1_YEAST	YGR254W	31	0	Structure	1l8p	D	99.5	99.8	2	437	-1	-1	-1	P00924-EXP-1l8p_D.pdb
P00924	ENO1_YEAST	YGR254W	32	0	Structure	2xh2	B	99.5	99.8	2	437	-1	-1	-1	P00924-EXP-2xh2_B.pdb
P00924	ENO1_YEAST	YGR254W	33	0	Structure	1p43	B	99.5	99.8	2	437	-1	-1	-1	P00924-EXP-1p43_B.pdb
P00924	ENO1_YEAST	YGR254W	34	0	Structure	2xgz	B	99.5	99.8	2	437	-1	-1	-1	P00924-EXP-2xgz_B.pdb
P00924	ENO1_YEAST	YGR254W	35	0	Structure	1p43	A	99.5	99.8	2	437	-1	-1	-1	P00924-EXP-1p43_A.pdb
P00924	ENO1_YEAST	YGR254W	36	0	Structure	2xh0	A	99.3	99.8	2	437	-1	-1	-1	P00924-EXP-2xh0_A.pdb
P00924	ENO1_YEAST	YGR254W	37	0	Structure	2xh0	B	99.3	99.8	2	437	-1	-1	-1	P00924-EXP-2xh0_B.pdb
P00924	ENO1_YEAST	YGR254W	38	0	Structure	2xh0	C	99.3	99.8	2	437	-1	-1	-1	P00924-EXP-2xh0_C.pdb
P00924	ENO1_YEAST	YGR254W	39	0	Structure	2xh0	D	99.3	99.8	2	437	-1	-1	-1	P00924-EXP-2xh0_D.pdb
P00924	ENO1_YEAST	YGR254W	40	0	Structure	2al1	B	98.6	99.8	2	437	-1	-1	-1	P00924-EXP-2al1_B.pdb
P00924	ENO1_YEAST	YGR254W	41	0	Structure	2al2	B	97.9	99.8	2	437	-1	-1	-1	P00924-EXP-2al2_B.pdb
P00924	ENO1_YEAST	YGR254W	42	0	Structure	2xh4	D	94.5	99.8	2	437	-1	-1	-1	P00924-EXP-2xh4_D.pdb
P00924	ENO1_YEAST	YGR254W	43	0	Structure	2xh4	B	94.5	99.8	2	437	-1	-1	-1	P00924-EXP-2xh4_B.pdb
P00924	ENO1_YEAST	YGR254W	44	0	Model	1te6	A	63	99.8	2	437	1	0	0	P00924-MDL-P00924.231-1te6_A.pdb
P32048	SYKM_YEAST	YNL073W	1	0	Model	3bju	A	34	93.6	34	572	1	1.262	0.16	P32048-MDL-P32048.4-3bju_A.pdb
P32048	SYKM_YEAST	YNL073W	2	0	Model	1e1o	A	32	92.7	34	567	1	0	0	P32048-MDL-P32048.5-1e1o_A.pdb
P32048	SYKM_YEAST	YNL073W	3	0	Model	1e1o	A	31	92.9	38	572	1	1.21	-0.21	P32048-MDL-P32048.1-1e1o_A.pdb
P32048	SYKM_YEAST	YNL073W	4	0	Model	1bbu	A	31	92.5	35	567	1	0	0	P32048-MDL-P32048.6-1bbu_A.pdb
P17967	PDI_YEAST	YCL043C	1	0	Structure	3boa	A	100	93.9	24	513	-1	-1	-1	P17967-EXP-3boa_A.pdb
P17967	PDI_YEAST	YCL043C	2	0	Structure	2b5e	A	100	92.3	23	504	-1	-1	-1	P17967-EXP-2b5e_A.pdb
P25372	TRX3_YEAST	YCR083W	1	0	Structure	2oe0	A	100	83.5	22	127	-1	-1	-1	P25372-EXP-2oe0_A.pdb
P25372	TRX3_YEAST	YCR083W	2	0	Structure	2oe1	A	100	83.5	22	127	-1	-1	-1	P25372-EXP-2oe1_A.pdb
P25372	TRX3_YEAST	YCR083W	3	0	Structure	2oe3	A	100	83.5	22	127	-1	-1	-1	P25372-EXP-2oe3_A.pdb
P25372	TRX3_YEAST	YCR083W	4	0	Structure	2oe1	B	100	83.5	22	127	-1	-1	-1	P25372-EXP-2oe1_B.pdb
P25372	TRX3_YEAST	YCR083W	5	0	Structure	2oe0	B	100	83.5	22	127	-1	-1	-1	P25372-EXP-2oe0_B.pdb
P25372	TRX3_YEAST	YCR083W	6	0	Structure	2oe3	B	100	81.9	24	127	-1	-1	-1	P25372-EXP-2oe3_B.pdb
P25372	TRX3_YEAST	YCR083W	7	0	Model	1r26	A	35	86.6	18	127	1	0	0	P25372-MDL-P25372.30-1r26_A.pdb
P25372	TRX3_YEAST	YCR083W	8	0	Model	3d22	A	29	100	1	127	1	1.245	-0.64	P25372-MDL-P25372.14-3d22_A.pdb
P25372	TRX3_YEAST	YCR083W	9	0	Model	2l5l	A	27	81.1	25	127	1	1.194	-0.66	P25372-MDL-P25372.18-2l5l_A.pdb
P25372	TRX3_YEAST	YCR083W	10	0	Model	2kuc	A	26	84.2	21	127	0.98	1.141	-0.29	P25372-MDL-P25372.8-2kuc_A.pdb
P25372	TRX3_YEAST	YCR083W	11	0	Model	2kuc	A	26	82.7	21	125	0.97	1.115	-0.21	P25372-MDL-P25372.5-2kuc_A.pdb
P25372	TRX3_YEAST	YCR083W	12	0	Model	2l57	A	23	92.9	10	127	0.94	1.141	-0.22	P25372-MDL-P25372.20-2l57_A.pdb
[truncated: 636 more rows]

## Sheet: Binary interactions
Supplemental Table S6. Structural information for all possible binary protein-protein interactions
UNIPROT_AC1	UNIPROT_ID1	ORF1	UNIPROT_AC2	UNIPROT_ID2	ORF2	RANK_MAJOR	RANK_MINOR	TYPE	PDB_ID	BIO_UNIT	CHAIN1	MODEL1	SEQ_IDENT1	COVERAGE1	SEQ_BEGIN1	SEQ_END1	DOMAIN1	CHAIN2	MODEL2	SEQ_IDENT2	COVERAGE2	SEQ_BEGIN2	SEQ_END2	DOMAIN2	FILENAME
P40582	GST1_YEAST	YIR038C	P40582	GST1_YEAST	YIR038C	1	0	Dom_dom_model	1ljr	-	B	-	11	30.8	144	216	GST_C	A	-	21	24.4	21	82	GST_N	P40582-P40582-MDD-GST_C-GST_N-1ljr-B-95-200-A-10-75.pdb
P38626	NCB5R_YEAST	YIL043C	P38626	NCB5R_YEAST	YIL043C	1	0	Model	2eix	1	B	0	44.8	84.9	28	268	-	A	0	44.8	84.9	28	268	-	P38626-P38626-MDL-2eix.pdb1-B-0-A-0.pdb
P43588	RPN11_YEAST	YFR004W	P43588	RPN11_YEAST	YFR004W	1	0	Dom_dom_model	4f7o	-	A	-	42.3	35	26	133	JAB	B	-	42.3	35	26	133	JAB	P43588-P43588-MDD-JAB-JAB-4f7o-A-50-164-B-50-164.pdb
P43588	RPN11_YEAST	YFR004W	P43588	RPN11_YEAST	YFR004W	2	0	Dom_dom_model	4b4t	-	V	-	81.8	30.7	193	291	MitMem_reg	U	-	22	35.6	24	133	JAB	P43588-P43588-MDD-MitMem_reg-JAB-4b4t-V-161-291-U-3-116.pdb
P32368	SAC1_YEAST	YKL212W	P32368	SAC1_YEAST	YKL212W	1	0	Structure	3lwt	2	X	0	100	73.2	1	456	-	X	1	100	73.2	1	456	-	P32368-P32368-EXP-3lwt.pdb2-X-0-X-1.pdb
P47154	STE24_YEAST	YJR117W	P47154	STE24_YEAST	YJR117W	1	0	Model	4aw6	6	D	0	38.6	93.4	22	444	-	E	0	38.6	93.4	22	444	-	P47154-P47154-MDL-4aw6.pdb6-D-0-E-0.pdb
P47154	STE24_YEAST	YJR117W	P47154	STE24_YEAST	YJR117W	2	0	Model	4aw6	5	B	0	38.6	93.4	22	444	-	A	0	38.6	93.4	22	444	-	P47154-P47154-MDL-4aw6.pdb5-B-0-A-0.pdb
P32568	SNQ2_YEAST	YDR011W	P33302	PDR5_YEAST	YOR153W	1	0	Dom_dom_model	3fvq	-	A	-	26.3	8.8	872	1021	ABC_tran	B	-	24.2	8.7	888	1038	ABC_tran	P32568-P33302-MDD-ABC_tran-ABC_tran-3fvq-A-20-167-B-20-167.pdb
P10823	GPA2_YEAST	YER020W	P10823	GPA2_YEAST	YER020W	1	0	Model	1kjy	3	C	0	43.6	71	122	440	-	A	1	43.8	71.7	122	443	-	P10823-P10823-MDL-1kjy.pdb3-C-0-A-1.pdb
P10823	GPA2_YEAST	YER020W	P10823	GPA2_YEAST	YER020W	2	0	Model	3v00	4	C	0	42.6	72.8	122	448	-	C	1	42.6	72.8	122	448	-	P10823-P10823-MDL-3v00.pdb4-C-0-C-1.pdb
P10823	GPA2_YEAST	YER020W	P10823	GPA2_YEAST	YER020W	3	0	Model	3v00	4	B	0	42.6	72.8	122	448	-	A	0	42.6	72.8	122	448	-	P10823-P10823-MDL-3v00.pdb4-B-0-A-0.pdb
P33302	PDR5_YEAST	YOR153W	P33302	PDR5_YEAST	YOR153W	1	0	Dom_dom_model	3fvq	-	A	-	24.2	8.7	888	1038	ABC_tran	B	-	24.2	8.7	888	1038	ABC_tran	P33302-P33302-MDD-ABC_tran-ABC_tran-3fvq-A-20-167-B-20-167.pdb
Q12335	PST2_YEAST	YDR032C	Q12335	PST2_YEAST	YDR032C	1	0	Model	3b6i	1	B	1	46.8	94.4	3	189	-	A	0	46.8	94.4	3	189	-	Q12335-Q12335-MDL-3b6i.pdb1-B-1-A-0.pdb
Q12335	PST2_YEAST	YDR032C	Q12335	PST2_YEAST	YDR032C	2	0	Model	3b6i	1	B	0	46.8	94.4	3	189	-	A	0	46.8	94.4	3	189	-	Q12335-Q12335-MDL-3b6i.pdb1-B-0-A-0.pdb
Q12335	PST2_YEAST	YDR032C	Q12335	PST2_YEAST	YDR032C	3	0	Model	3b6i	1	B	0	46.8	94.4	3	189	-	B	1	46.8	94.4	3	189	-	Q12335-Q12335-MDL-3b6i.pdb1-B-0-B-1.pdb
P32445	RIM1_YEAST	YCR028C-A	P32445	RIM1_YEAST	YCR028C-A	1	0	Dom_dom_model	1sru	-	A	-	21	70.4	20	115	SSB	D	-	20	70.4	20	115	SSB	P32445-P32445-MDD-SSB-SSB-1sru-A-1005-1112-D-4005-4112.pdb
P32568	SNQ2_YEAST	YDR011W	P32568	SNQ2_YEAST	YDR011W	1	0	Dom_dom_model	2onj	-	A	-	27.7	8.9	872	1022	ABC_tran	B	-	27.7	8.9	872	1022	ABC_tran	P32568-P32568-MDD-ABC_tran-ABC_tran-2onj-A-357-506-B-357-506.pdb
P01123	YPT1_YEAST	YFL038C	P01123	YPT1_YEAST	YFL038C	1	0	Model	1g16	1	B	0	51.2	79.6	10	173	-	C	0	53.7	79.6	10	173	-	P01123-P01123-MDL-1g16.pdb1-B-0-C-0.pdb
P01123	YPT1_YEAST	YFL038C	P01123	YPT1_YEAST	YFL038C	2	0	Model	1g16	1	D	0	51.2	79.6	10	173	-	C	0	53.7	79.6	10	173	-	P01123-P01123-MDL-1g16.pdb1-D-0-C-0.pdb
P01123	YPT1_YEAST	YFL038C	P01123	YPT1_YEAST	YFL038C	3	0	Model	1oiv	1	B	0	53.6	80.6	4	169	-	A	0	53.6	80.6	4	169	-	P01123-P01123-MDL-1oiv.pdb1-B-0-A-0.pdb
P00401	COX1_YEAST	Q0045	P00410	COX2_YEAST	Q0250	1	0	Model	3ag2	1	A	0	56.8	99.1	2	530	-	B	0	43	90.8	20	247	-	P00401-P00410-MDL-3ag2.pdb1-A-0-B-0.pdb
P00401	COX1_YEAST	Q0045	P00410	COX2_YEAST	Q0250	2	0	Model	3ag3	2	N	0	56.8	99.1	2	530	-	O	0	43	90.8	20	247	-	P00401-P00410-MDL-3ag3.pdb2-N-0-O-0.pdb
P00401	COX1_YEAST	Q0045	P00410	COX2_YEAST	Q0250	3	0	Model	3ag2	2	N	0	56.8	99.1	2	530	-	O	0	43	90.8	20	247	-	P00401-P00410-MDL-3ag2.pdb2-N-0-O-0.pdb
P00401	COX1_YEAST	Q0045	P00420	COX3_YEAST	Q0275	1	0	Model	3ag3	1	A	0	56.8	99.1	2	530	-	C	0	46.2	96.7	9	268	-	P00401-P00420-MDL-3ag3.pdb1-A-0-C-0.pdb
P00401	COX1_YEAST	Q0045	P00420	COX3_YEAST	Q0275	2	0	Model	2dyr	1	N	0	56.8	99.1	2	530	-	P	0	46.2	96.7	9	268	-	P00401-P00420-MDL-2dyr.pdb1-N-0-P-0.pdb
P00401	COX1_YEAST	Q0045	P00420	COX3_YEAST	Q0275	3	0	Model	2dyr	1	A	0	56.8	99.1	2	530	-	C	0	46.2	96.7	9	268	-	P00401-P00420-MDL-2dyr.pdb1-A-0-C-0.pdb
P00163	CYB_YEAST	Q0105	P07256	QCR1_YEAST	YBL045C	1	0	Structure	3cx5	1	C	0	100	100	1	385	-	A	0	99.8	94.3	27	457	-	P00163-P07256-EXP-3cx5.pdb1-C-0-A-0.pdb
P00163	CYB_YEAST	Q0105	P07256	QCR1_YEAST	YBL045C	2	0	Structure	3cx5	1	N	0	100	100	1	385	-	L	0	99.8	94.3	27	457	-	P00163-P07256-EXP-3cx5.pdb1-N-0-L-0.pdb
P00163	CYB_YEAST	Q0105	P07256	QCR1_YEAST	YBL045C	3	0	Structure	1kb9	1	C	0	99.7	100	1	385	-	A	0	99.8	94.3	27	457	-	P00163-P07256-EXP-1kb9.pdb1-C-0-A-0.pdb
P00163	CYB_YEAST	Q0105	P07256	QCR1_YEAST	YBL045C	4	0	Structure	2ibz	1	C	0	99.7	100	1	385	-	A	0	99.8	94.3	27	457	-	P00163-P07256-EXP-2ibz.pdb1-C-0-A-0.pdb
P00163	CYB_YEAST	Q0105	P07256	QCR1_YEAST	YBL045C	5	0	Structure	1ezv	1	C	0	99.7	100	1	385	-	A	0	99.5	94.3	27	457	-	P00163-P07256-EXP-1ezv.pdb1-C-0-A-0.pdb
P00163	CYB_YEAST	Q0105	P07256	QCR1_YEAST	YBL045C	6	0	Structure	1ezv	1	C	1	99.7	100	1	385	-	A	1	99.5	94.3	27	457	-	P00163-P07256-EXP-1ezv.pdb1-C-1-A-1.pdb
P00163	CYB_YEAST	Q0105	P07256	QCR1_YEAST	YBL045C	7	0	Structure	3cxh	1	N	0	100	100	1	385	-	L	0	99.8	94.3	27	457	-	P00163-P07256-EXP-3cxh.pdb1-N-0-L-0.pdb
P00163	CYB_YEAST	Q0105	P07256	QCR1_YEAST	YBL045C	8	0	Structure	3cxh	1	C	0	100	100	1	385	-	A	0	99.8	94.3	27	457	-	P00163-P07256-EXP-3cxh.pdb1-C-0-A-0.pdb
P00163	CYB_YEAST	Q0105	P07256	QCR1_YEAST	YBL045C	9	0	Structure	1p84	1	C	1	99.7	100	1	385	-	A	1	99.8	94.3	27	457	-	P00163-P07256-EXP-1p84.pdb1-C-1-A-1.pdb
P00163	CYB_YEAST	Q0105	P07256	QCR1_YEAST	YBL045C	10	0	Structure	1p84	1	C	0	99.7	100	1	385	-	A	0	99.8	94.3	27	457	-	P00163-P07256-EXP-1p84.pdb1-C-0-A-0.pdb
P00163	CYB_YEAST	Q0105	P07256	QCR1_YEAST	YBL045C	11	0	Structure	1kyo	1	N	0	99.7	100	1	385	-	L	0	99.5	94.3	27	457	-	P00163-P07256-EXP-1kyo.pdb1-N-0-L-0.pdb
P00163	CYB_YEAST	Q0105	P07256	QCR1_YEAST	YBL045C	12	0	Structure	1kyo	1	C	0	99.7	100	1	385	-	A	0	99.5	94.3	27	457	-	P00163-P07256-EXP-1kyo.pdb1-C-0-A-0.pdb
P00163	CYB_YEAST	Q0105	P00163	CYB_YEAST	Q0105	1	0	Structure	3cx5	1	N	0	100	100	1	385	-	C	0	100	100	1	385	-	P00163-P00163-EXP-3cx5.pdb1-N-0-C-0.pdb
P00163	CYB_YEAST	Q0105	P00163	CYB_YEAST	Q0105	2	0	Structure	1ezv	1	C	0	99.7	100	1	385	-	C	1	99.7	100	1	385	-	P00163-P00163-EXP-1ezv.pdb1-C-0-C-1.pdb
P00163	CYB_YEAST	Q0105	P00163	CYB_YEAST	Q0105	3	0	Structure	3cxh	1	N	0	100	100	1	385	-	C	0	100	100	1	385	-	P00163-P00163-EXP-3cxh.pdb1-N-0-C-0.pdb
P00163	CYB_YEAST	Q0105	P00163	CYB_YEAST	Q0105	4	0	Structure	1p84	1	C	0	99.7	100	1	385	-	C	1	99.7	100	1	385	-	P00163-P00163-EXP-1p84.pdb1-C-0-C-1.pdb
P00163	CYB_YEAST	Q0105	P00163	CYB_YEAST	Q0105	5	0	Structure	1kyo	1	N	0	99.7	100	1	385	-	C	0	99.7	100	1	385	-	P00163-P00163-EXP-1kyo.pdb1-N-0-C-0.pdb
P07256	QCR1_YEAST	YBL045C	P07256	QCR1_YEAST	YBL045C	1	0	Dom_dom_model	3ih6	-	A	-	18.2	21.7	260	368	Peptidase_M16_C	D	-	18	21.9	259	368	Peptidase_M16_C	P07256-P07256-MDD-Peptidase_M16_C-Peptidase_M16_C-3ih6-A-262-381-D-257-381.pdb
P07256	QCR1_YEAST	YBL045C	P07256	QCR1_YEAST	YBL045C	2	0	Dom_dom_model	1kb9	-	A	-	96.6	30.9	37	181	Peptidase_M16	B	-	14.2	34.8	189	357	Peptidase_M16_C	P07256-P07256-MDD-Peptidase_M16-Peptidase_M16_C-1kb9-A-37-182-B-166-327.pdb
P07213	TOM70_YEAST	YNL121C	P07213	TOM70_YEAST	YNL121C	1	0	Structure	2gw1	1	B	0	94.7	83.3	94	607	-	A	0	94.7	83.3	94	607	-	P07213-P07213-EXP-2gw1.pdb1-B-0-A-0.pdb
P21306	ATP5E_YEAST	YPL271W	P38077	ATPG_YEAST	YBR039W	1	0	Structure	3zia	2	I	0	95.1	98.4	2	62	-	G	0	96	88.7	34	309	-	P21306-P38077-EXP-3zia.pdb2-I-0-G-0.pdb
P21306	ATP5E_YEAST	YPL271W	P38077	ATPG_YEAST	YBR039W	2	0	Structure	3zia	1	S	0	95.1	98.4	2	62	-	Q	0	96	88.7	34	309	-	P21306-P38077-EXP-3zia.pdb1-S-0-Q-0.pdb
P21306	ATP5E_YEAST	YPL271W	P38077	ATPG_YEAST	YBR039W	3	0	Structure	3oee	1	I	0	90.7	87.1	9	62	-	G	0	96.4	88.7	34	309	-	P21306-P38077-EXP-3oee.pdb1-I-0-G-0.pdb
P21306	ATP5E_YEAST	YPL271W	P38077	ATPG_YEAST	YBR039W	4	0	Structure	3oee	2	R	0	89.5	61.3	11	48	-	P	0	88.4	88.7	34	309	-	P21306-P38077-EXP-3oee.pdb2-R-0-P-0.pdb
P21306	ATP5E_YEAST	YPL271W	P38077	ATPG_YEAST	YBR039W	5	0	Structure	3oee	3	1	0	73	59.7	10	46	-	Y	0	72.7	88.4	34	308	-	P21306-P38077-EXP-3oee.pdb3-1-0-Y-0.pdb
P21306	ATP5E_YEAST	YPL271W	P38077	ATPG_YEAST	YBR039W	6	0	Structure	2hld	1	I	0	88.9	87.1	9	62	-	G	0	96	88.7	34	309	-	P21306-P38077-EXP-2hld.pdb1-I-0-G-0.pdb
P21306	ATP5E_YEAST	YPL271W	P38077	ATPG_YEAST	YBR039W	7	0	Structure	2hld	2	R	0	89.5	61.3	11	48	-	P	0	88	88.7	34	309	-	P21306-P38077-EXP-2hld.pdb2-R-0-P-0.pdb
P21306	ATP5E_YEAST	YPL271W	P38077	ATPG_YEAST	YBR039W	8	0	Structure	2hld	3	1	0	73	59.7	10	46	-	Y	0	72.7	88.4	34	308	-	P21306-P38077-EXP-2hld.pdb3-1-0-Y-0.pdb
P21306	ATP5E_YEAST	YPL271W	P38077	ATPG_YEAST	YBR039W	9	0	Structure	3oeh	1	I	0	90.7	87.1	9	62	-	G	0	96.4	88.7	34	309	-	P21306-P38077-EXP-3oeh.pdb1-I-0-G-0.pdb
P21306	ATP5E_YEAST	YPL271W	P38077	ATPG_YEAST	YBR039W	10	0	Structure	3oeh	2	R	0	89.5	61.3	11	48	-	P	0	89.1	88.7	34	309	-	P21306-P38077-EXP-3oeh.pdb2-R-0-P-0.pdb
P21306	ATP5E_YEAST	YPL271W	P38077	ATPG_YEAST	YBR039W	11	0	Structure	3oeh	3	1	0	73	59.7	10	46	-	Y	0	73.1	88.4	34	308	-	P21306-P38077-EXP-3oeh.pdb3-1-0-Y-0.pdb
P21306	ATP5E_YEAST	YPL271W	P38077	ATPG_YEAST	YBR039W	12	0	Structure	3ofn	1	I	0	94.8	93.5	5	62	-	G	0	97.1	88.7	34	309	-	P21306-P38077-EXP-3ofn.pdb1-I-0-G-0.pdb
P21306	ATP5E_YEAST	YPL271W	P38077	ATPG_YEAST	YBR039W	13	0	Structure	3ofn	2	R	0	94.8	93.5	5	62	-	P	0	97.1	88.7	34	309	-	P21306-P38077-EXP-3ofn.pdb2-R-0-P-0.pdb
P21306	ATP5E_YEAST	YPL271W	P38077	ATPG_YEAST	YBR039W	14	0	Structure	3oe7	1	I	0	88.9	87.1	9	62	-	G	0	95.7	88.7	34	309	-	P21306-P38077-EXP-3oe7.pdb1-I-0-G-0.pdb
P21306	ATP5E_YEAST	YPL271W	P38077	ATPG_YEAST	YBR039W	15	0	Structure	3oe7	2	R	0	81.6	61.3	11	48	-	P	0	88	88.7	34	309	-	P21306-P38077-EXP-3oe7.pdb2-R-0-P-0.pdb
P21306	ATP5E_YEAST	YPL271W	P38077	ATPG_YEAST	YBR039W	16	0	Structure	3oe7	3	1	0	67.6	59.7	10	46	-	Y	0	71.6	88.4	34	308	-	P21306-P38077-EXP-3oe7.pdb3-1-0-Y-0.pdb
P21306	ATP5E_YEAST	YPL271W	P38077	ATPG_YEAST	YBR039W	17	0	Structure	2wpd	1	I	0	100	95.2	2	60	-	G	0	96.8	89.4	34	311	-	P21306-P38077-EXP-2wpd.pdb1-I-0-G-0.pdb
P21306	ATP5E_YEAST	YPL271W	P38077	ATPG_YEAST	YBR039W	18	0	Structure	3fks	1	I	0	85.2	87.1	9	62	-	G	0	97.1	88.7	34	309	-	P21306-P38077-EXP-3fks.pdb1-I-0-G-0.pdb
P21306	ATP5E_YEAST	YPL271W	P38077	ATPG_YEAST	YBR039W	19	0	Structure	3fks	2	R	0	67.6	59.7	12	48	-	P	0	85.1	88.7	34	309	-	P21306-P38077-EXP-3fks.pdb2-R-0-P-0.pdb
P21306	ATP5E_YEAST	YPL271W	P38077	ATPG_YEAST	YBR039W	20	0	Structure	3fks	3	1	0	69.4	58.1	9	44	-	Y	0	67.8	88.7	34	309	-	P21306-P38077-EXP-3fks.pdb3-1-0-Y-0.pdb
P21306	ATP5E_YEAST	YPL271W	P38077	ATPG_YEAST	YBR039W	21	0	Structure	4b2q	1	i	0	100	95.2	2	60	-	g	0	96.8	89.4	34	311	-	P21306-P38077-EXP-4b2q.pdb1-i-0-g-0.pdb
P21306	ATP5E_YEAST	YPL271W	P38077	ATPG_YEAST	YBR039W	22	0	Structure	4b2q	1	I	0	100	95.2	2	60	-	G	0	96.8	89.4	34	311	-	P21306-P38077-EXP-4b2q.pdb1-I-0-G-0.pdb
P00830	ATPB_YEAST	YJR121W	P07251	ATPA_YEAST	YBL099W	1	0	Structure	3zia	1	N	0	100	92	39	508	-	K	0	100	88.8	61	544	-	P00830-P07251-EXP-3zia.pdb1-N-0-K-0.pdb
P00830	ATPB_YEAST	YJR121W	P07251	ATPA_YEAST	YBL099W	2	0	Structure	3zia	2	D	0	100	92	39	508	-	A	0	100	88.8	61	544	-	P00830-P07251-EXP-3zia.pdb2-D-0-A-0.pdb
P00830	ATPB_YEAST	YJR121W	P07251	ATPA_YEAST	YBL099W	3	0	Structure	3zia	2	D	0	100	92	39	508	-	C	0	100	88.8	61	544	-	P00830-P07251-EXP-3zia.pdb2-D-0-C-0.pdb
P00830	ATPB_YEAST	YJR121W	P07251	ATPA_YEAST	YBL099W	4	0	Structure	3zia	1	N	0	100	92	39	508	-	M	0	100	88.8	61	544	-	P00830-P07251-EXP-3zia.pdb1-N-0-M-0.pdb
P00830	ATPB_YEAST	YJR121W	P07251	ATPA_YEAST	YBL099W	5	0	Structure	3zia	1	P	0	100	91.8	40	508	-	M	0	100	88.8	61	544	-	P00830-P07251-EXP-3zia.pdb1-P-0-M-0.pdb
P00830	ATPB_YEAST	YJR121W	P07251	ATPA_YEAST	YBL099W	6	0	Structure	3zia	2	F	0	100	91.8	40	508	-	C	0	100	88.8	61	544	-	P00830-P07251-EXP-3zia.pdb2-F-0-C-0.pdb
P00830	ATPB_YEAST	YJR121W	P07251	ATPA_YEAST	YBL099W	7	0	Structure	3zia	1	O	0	100	91.6	41	508	-	K	0	100	88.8	61	544	-	P00830-P07251-EXP-3zia.pdb1-O-0-K-0.pdb
P00830	ATPB_YEAST	YJR121W	P07251	ATPA_YEAST	YBL099W	8	0	Structure	3zia	2	E	0	100	91.6	41	508	-	A	0	100	88.8	61	544	-	P00830-P07251-EXP-3zia.pdb2-E-0-A-0.pdb
P00830	ATPB_YEAST	YJR121W	P07251	ATPA_YEAST	YBL099W	9	0	Structure	3zia	1	P	0	100	91.8	40	508	-	L	0	99	89	60	544	-	P00830-P07251-EXP-3zia.pdb1-P-0-L-0.pdb
P00830	ATPB_YEAST	YJR121W	P07251	ATPA_YEAST	YBL099W	10	0	Structure	3zia	2	F	0	100	91.8	40	508	-	B	0	99	89	60	544	-	P00830-P07251-EXP-3zia.pdb2-F-0-B-0.pdb
P00830	ATPB_YEAST	YJR121W	P07251	ATPA_YEAST	YBL099W	11	0	Structure	3zia	1	O	0	100	91.6	41	508	-	L	0	99	89	60	544	-	P00830-P07251-EXP-3zia.pdb1-O-0-L-0.pdb
P00830	ATPB_YEAST	YJR121W	P07251	ATPA_YEAST	YBL099W	12	0	Structure	3zia	2	E	0	100	91.6	41	508	-	B	0	99	89	60	544	-	P00830-P07251-EXP-3zia.pdb2-E-0-B-0.pdb
P00830	ATPB_YEAST	YJR121W	P07251	ATPA_YEAST	YBL099W	13	0	Structure	3oee	2	N	0	100	92	39	508	-	K	0	99.2	89.7	56	544	-	P00830-P07251-EXP-3oee.pdb2-N-0-K-0.pdb
P00830	ATPB_YEAST	YJR121W	P07251	ATPA_YEAST	YBL099W	14	0	Structure	3oee	1	D	0	100	92	39	508	-	C	0	99.8	88.8	61	544	-	P00830-P07251-EXP-3oee.pdb1-D-0-C-0.pdb
P00830	ATPB_YEAST	YJR121W	P07251	ATPA_YEAST	YBL099W	15	0	Structure	3oee	2	O	0	100	91.6	40	507	-	K	0	99.2	89.7	56	544	-	P00830-P07251-EXP-3oee.pdb2-O-0-K-0.pdb
P00830	ATPB_YEAST	YJR121W	P07251	ATPA_YEAST	YBL099W	16	0	Structure	3oee	1	F	0	100	91.8	40	508	-	C	0	99.8	88.8	61	544	-	P00830-P07251-EXP-3oee.pdb1-F-0-C-0.pdb
P00830	ATPB_YEAST	YJR121W	P07251	ATPA_YEAST	YBL099W	17	0	Structure	3oee	1	D	0	100	92	39	508	-	A	0	99.4	88.8	61	544	-	P00830-P07251-EXP-3oee.pdb1-D-0-A-0.pdb
P00830	ATPB_YEAST	YJR121W	P07251	ATPA_YEAST	YBL099W	18	0	Structure	3oee	2	M	0	100	92	39	508	-	L	0	99.4	88.8	61	544	-	P00830-P07251-EXP-3oee.pdb2-M-0-L-0.pdb
P00830	ATPB_YEAST	YJR121W	P07251	ATPA_YEAST	YBL099W	19	0	Structure	3oee	1	F	0	100	91.8	40	508	-	B	0	99.4	89	60	544	-	P00830-P07251-EXP-3oee.pdb1-F-0-B-0.pdb
P00830	ATPB_YEAST	YJR121W	P07251	ATPA_YEAST	YBL099W	20	0	Structure	3oee	2	M	0	100	92	39	508	-	J	0	99.2	88.8	61	544	-	P00830-P07251-EXP-3oee.pdb2-M-0-J-0.pdb
P00830	ATPB_YEAST	YJR121W	P07251	ATPA_YEAST	YBL099W	21	0	Structure	3oee	2	N	0	100	92	39	508	-	J	0	99.2	88.8	61	544	-	P00830-P07251-EXP-3oee.pdb2-N-0-J-0.pdb
P00830	ATPB_YEAST	YJR121W	P07251	ATPA_YEAST	YBL099W	22	0	Structure	3oee	3	V	0	100	92	39	508	-	U	0	99.2	88.8	61	544	-	P00830-P07251-EXP-3oee.pdb3-V-0-U-0.pdb
P00830	ATPB_YEAST	YJR121W	P07251	ATPA_YEAST	YBL099W	23	0	Structure	3oee	1	E	0	100	91.6	41	508	-	B	0	99.4	89	60	544	-	P00830-P07251-EXP-3oee.pdb1-E-0-B-0.pdb
P00830	ATPB_YEAST	YJR121W	P07251	ATPA_YEAST	YBL099W	24	0	Structure	3oee	3	X	0	100	91.8	40	508	-	U	0	99.2	88.8	61	544	-	P00830-P07251-EXP-3oee.pdb3-X-0-U-0.pdb
P00830	ATPB_YEAST	YJR121W	P07251	ATPA_YEAST	YBL099W	25	0	Structure	3oee	2	O	0	100	91.6	40	507	-	L	0	99.4	88.8	61	544	-	P00830-P07251-EXP-3oee.pdb2-O-0-L-0.pdb
P00830	ATPB_YEAST	YJR121W	P07251	ATPA_YEAST	YBL099W	26	0	Structure	3oee	1	E	0	100	91.6	41	508	-	A	0	99.4	88.8	61	544	-	P00830-P07251-EXP-3oee.pdb1-E-0-A-0.pdb
P00830	ATPB_YEAST	YJR121W	P07251	ATPA_YEAST	YBL099W	27	0	Structure	3oee	3	V	0	100	92	39	508	-	S	0	98.6	88.6	62	544	-	P00830-P07251-EXP-3oee.pdb3-V-0-S-0.pdb
P00830	ATPB_YEAST	YJR121W	P07251	ATPA_YEAST	YBL099W	28	0	Structure	3oee	3	X	0	100	91.8	40	508	-	T	0	98.6	88.8	61	544	-	P00830-P07251-EXP-3oee.pdb3-X-0-T-0.pdb
P00830	ATPB_YEAST	YJR121W	P07251	ATPA_YEAST	YBL099W	29	0	Structure	3oee	3	W	0	100	91.4	41	507	-	T	0	98.6	88.8	61	544	-	P00830-P07251-EXP-3oee.pdb3-W-0-T-0.pdb
P00830	ATPB_YEAST	YJR121W	P07251	ATPA_YEAST	YBL099W	30	0	Structure	3oee	3	W	0	100	91.4	41	507	-	S	0	98.6	88.6	62	544	-	P00830-P07251-EXP-3oee.pdb3-W-0-S-0.pdb
P00830	ATPB_YEAST	YJR121W	P07251	ATPA_YEAST	YBL099W	31	0	Structure	2hld	2	N	0	100	92	39	508	-	K	0	99.4	89.7	56	544	-	P00830-P07251-EXP-2hld.pdb2-N-0-K-0.pdb
P00830	ATPB_YEAST	YJR121W	P07251	ATPA_YEAST	YBL099W	32	0	Structure	2hld	1	D	0	100	92	39	508	-	C	0	100	88.8	61	544	-	P00830-P07251-EXP-2hld.pdb1-D-0-C-0.pdb
P00830	ATPB_YEAST	YJR121W	P07251	ATPA_YEAST	YBL099W	33	0	Structure	2hld	2	O	0	100	91.6	40	507	-	K	0	99.4	89.7	56	544	-	P00830-P07251-EXP-2hld.pdb2-O-0-K-0.pdb
P00830	ATPB_YEAST	YJR121W	P07251	ATPA_YEAST	YBL099W	34	0	Structure	2hld	1	F	0	100	91.8	40	508	-	C	0	100	88.8	61	544	-	P00830-P07251-EXP-2hld.pdb1-F-0-C-0.pdb
P00830	ATPB_YEAST	YJR121W	P07251	ATPA_YEAST	YBL099W	35	0	Structure	2hld	1	D	0	100	92	39	508	-	A	0	99.6	88.8	61	544	-	P00830-P07251-EXP-2hld.pdb1-D-0-A-0.pdb
P00830	ATPB_YEAST	YJR121W	P07251	ATPA_YEAST	YBL099W	36	0	Structure	2hld	2	M	0	100	92	39	508	-	L	0	99.6	88.8	61	544	-	P00830-P07251-EXP-2hld.pdb2-M-0-L-0.pdb
P00830	ATPB_YEAST	YJR121W	P07251	ATPA_YEAST	YBL099W	37	0	Structure	2hld	1	F	0	100	91.8	40	508	-	B	0	99.6	89	60	544	-	P00830-P07251-EXP-2hld.pdb1-F-0-B-0.pdb
P00830	ATPB_YEAST	YJR121W	P07251	ATPA_YEAST	YBL099W	38	0	Structure	2hld	2	M	0	100	92	39	508	-	J	0	99.4	88.8	61	544	-	P00830-P07251-EXP-2hld.pdb2-M-0-J-0.pdb
P00830	ATPB_YEAST	YJR121W	P07251	ATPA_YEAST	YBL099W	39	0	Structure	2hld	3	V	0	100	92	39	508	-	U	0	99.4	88.8	61	544	-	P00830-P07251-EXP-2hld.pdb3-V-0-U-0.pdb
P00830	ATPB_YEAST	YJR121W	P07251	ATPA_YEAST	YBL099W	40	0	Structure	2hld	2	N	0	100	92	39	508	-	J	0	99.4	88.8	61	544	-	P00830-P07251-EXP-2hld.pdb2-N-0-J-0.pdb
P00830	ATPB_YEAST	YJR121W	P07251	ATPA_YEAST	YBL099W	41	0	Structure	2hld	1	E	0	100	91.6	41	508	-	B	0	99.6	89	60	544	-	P00830-P07251-EXP-2hld.pdb1-E-0-B-0.pdb
P00830	ATPB_YEAST	YJR121W	P07251	ATPA_YEAST	YBL099W	42	0	Structure	2hld	3	V	0	100	92	39	508	-	S	0	99.4	88.6	62	544	-	P00830-P07251-EXP-2hld.pdb3-V-0-S-0.pdb
P00830	ATPB_YEAST	YJR121W	P07251	ATPA_YEAST	YBL099W	43	0	Structure	2hld	3	X	0	100	91.8	40	508	-	U	0	99.4	88.8	61	544	-	P00830-P07251-EXP-2hld.pdb3-X-0-U-0.pdb
P00830	ATPB_YEAST	YJR121W	P07251	ATPA_YEAST	YBL099W	44	0	Structure	2hld	3	X	0	100	91.8	40	508	-	T	0	99.4	88.8	61	544	-	P00830-P07251-EXP-2hld.pdb3-X-0-T-0.pdb
P00830	ATPB_YEAST	YJR121W	P07251	ATPA_YEAST	YBL099W	45	0	Structure	2hld	2	O	0	100	91.6	40	507	-	L	0	99.6	88.8	61	544	-	P00830-P07251-EXP-2hld.pdb2-O-0-L-0.pdb
P00830	ATPB_YEAST	YJR121W	P07251	ATPA_YEAST	YBL099W	46	0	Structure	2hld	1	E	0	100	91.6	41	508	-	A	0	99.6	88.8	61	544	-	P00830-P07251-EXP-2hld.pdb1-E-0-A-0.pdb
P00830	ATPB_YEAST	YJR121W	P07251	ATPA_YEAST	YBL099W	47	0	Structure	2hld	3	W	0	100	91.4	41	507	-	T	0	99.4	88.8	61	544	-	P00830-P07251-EXP-2hld.pdb3-W-0-T-0.pdb
P00830	ATPB_YEAST	YJR121W	P07251	ATPA_YEAST	YBL099W	48	0	Structure	2hld	3	W	0	100	91.4	41	507	-	S	0	99.4	88.6	62	544	-	P00830-P07251-EXP-2hld.pdb3-W-0-S-0.pdb
P00830	ATPB_YEAST	YJR121W	P07251	ATPA_YEAST	YBL099W	49	0	Structure	3oeh	2	N	0	99.8	92	39	508	-	K	0	99.4	89.7	56	544	-	P00830-P07251-EXP-3oeh.pdb2-N-0-K-0.pdb
P00830	ATPB_YEAST	YJR121W	P07251	ATPA_YEAST	YBL099W	50	0	Structure	3oeh	1	D	0	99.8	92	39	508	-	C	0	100	88.8	61	544	-	P00830-P07251-EXP-3oeh.pdb1-D-0-C-0.pdb
P00830	ATPB_YEAST	YJR121W	P07251	ATPA_YEAST	YBL099W	51	0	Structure	3oeh	2	O	0	99.8	91.6	40	507	-	K	0	99.4	89.7	56	544	-	P00830-P07251-EXP-3oeh.pdb2-O-0-K-0.pdb
P00830	ATPB_YEAST	YJR121W	P07251	ATPA_YEAST	YBL099W	52	0	Structure	3oeh	1	F	0	99.8	91.8	40	508	-	C	0	100	88.8	61	544	-	P00830-P07251-EXP-3oeh.pdb1-F-0-C-0.pdb
P00830	ATPB_YEAST	YJR121W	P07251	ATPA_YEAST	YBL099W	53	0	Structure	3oeh	2	M	0	99.8	92	39	508	-	L	0	99.6	88.8	61	544	-	P00830-P07251-EXP-3oeh.pdb2-M-0-L-0.pdb
P00830	ATPB_YEAST	YJR121W	P07251	ATPA_YEAST	YBL099W	54	0	Structure	3oeh	1	D	0	99.8	92	39	508	-	A	0	99.6	88.8	61	544	-	P00830-P07251-EXP-3oeh.pdb1-D-0-A-0.pdb
P00830	ATPB_YEAST	YJR121W	P07251	ATPA_YEAST	YBL099W	55	0	Structure	3oeh	1	F	0	99.8	91.8	40	508	-	B	0	99.6	89	60	544	-	P00830-P07251-EXP-3oeh.pdb1-F-0-B-0.pdb
P00830	ATPB_YEAST	YJR121W	P07251	ATPA_YEAST	YBL099W	56	0	Structure	3oeh	3	V	0	99.8	92	39	508	-	U	0	99.4	88.8	61	544	-	P00830-P07251-EXP-3oeh.pdb3-V-0-U-0.pdb
P00830	ATPB_YEAST	YJR121W	P07251	ATPA_YEAST	YBL099W	57	0	Structure	3oeh	2	M	0	99.8	92	39	508	-	J	0	99.4	88.8	61	544	-	P00830-P07251-EXP-3oeh.pdb2-M-0-J-0.pdb
P00830	ATPB_YEAST	YJR121W	P07251	ATPA_YEAST	YBL099W	58	0	Structure	3oeh	2	N	0	99.8	92	39	508	-	J	0	99.4	88.8	61	544	-	P00830-P07251-EXP-3oeh.pdb2-N-0-J-0.pdb
P00830	ATPB_YEAST	YJR121W	P07251	ATPA_YEAST	YBL099W	59	0	Structure	3oeh	1	E	0	99.8	91.6	41	508	-	B	0	99.6	89	60	544	-	P00830-P07251-EXP-3oeh.pdb1-E-0-B-0.pdb
P00830	ATPB_YEAST	YJR121W	P07251	ATPA_YEAST	YBL099W	60	0	Structure	3oeh	3	X	0	99.8	91.8	40	508	-	U	0	99.4	88.8	61	544	-	P00830-P07251-EXP-3oeh.pdb3-X-0-U-0.pdb
P00830	ATPB_YEAST	YJR121W	P07251	ATPA_YEAST	YBL099W	61	0	Structure	3oeh	2	O	0	99.8	91.6	40	507	-	L	0	99.6	88.8	61	544	-	P00830-P07251-EXP-3oeh.pdb2-O-0-L-0.pdb
P00830	ATPB_YEAST	YJR121W	P07251	ATPA_YEAST	YBL099W	62	0	Structure	3oeh	1	E	0	99.8	91.6	41	508	-	A	0	99.6	88.8	61	544	-	P00830-P07251-EXP-3oeh.pdb1-E-0-A-0.pdb
P00830	ATPB_YEAST	YJR121W	P07251	ATPA_YEAST	YBL099W	63	0	Structure	3oeh	3	V	0	99.8	92	39	508	-	S	0	99	88.6	62	544	-	P00830-P07251-EXP-3oeh.pdb3-V-0-S-0.pdb
P00830	ATPB_YEAST	YJR121W	P07251	ATPA_YEAST	YBL099W	64	0	Structure	3oeh	3	X	0	99.8	91.8	40	508	-	T	0	99	88.8	61	544	-	P00830-P07251-EXP-3oeh.pdb3-X-0-T-0.pdb
P00830	ATPB_YEAST	YJR121W	P07251	ATPA_YEAST	YBL099W	65	0	Structure	3oeh	3	W	0	99.8	91.4	41	507	-	T	0	99	88.8	61	544	-	P00830-P07251-EXP-3oeh.pdb3-W-0-T-0.pdb
P00830	ATPB_YEAST	YJR121W	P07251	ATPA_YEAST	YBL099W	66	0	Structure	3oeh	3	W	0	99.8	91.4	41	507	-	S	0	99	88.6	62	544	-	P00830-P07251-EXP-3oeh.pdb3-W-0-S-0.pdb
P00830	ATPB_YEAST	YJR121W	P07251	ATPA_YEAST	YBL099W	67	0	Structure	2xok	1	D	0	100	92.2	39	509	-	C	0	100	89	61	545	-	P00830-P07251-EXP-2xok.pdb1-D-0-C-0.pdb
P00830	ATPB_YEAST	YJR121W	P07251	ATPA_YEAST	YBL099W	68	0	Structure	2xok	1	F	0	100	92	40	509	-	C	0	100	89	61	545	-	P00830-P07251-EXP-2xok.pdb1-F-0-C-0.pdb
P00830	ATPB_YEAST	YJR121W	P07251	ATPA_YEAST	YBL099W	69	0	Structure	2xok	1	D	0	100	92.2	39	509	-	A	0	99.6	89	61	545	-	P00830-P07251-EXP-2xok.pdb1-D-0-A-0.pdb
P00830	ATPB_YEAST	YJR121W	P07251	ATPA_YEAST	YBL099W	70	0	Structure	2xok	1	F	0	100	92	40	509	-	B	0	99.6	89.2	60	545	-	P00830-P07251-EXP-2xok.pdb1-F-0-B-0.pdb
P00830	ATPB_YEAST	YJR121W	P07251	ATPA_YEAST	YBL099W	71	0	Structure	2xok	1	E	0	100	91.8	41	509	-	B	0	99.6	89.2	60	545	-	P00830-P07251-EXP-2xok.pdb1-E-0-B-0.pdb
P00830	ATPB_YEAST	YJR121W	P07251	ATPA_YEAST	YBL099W	72	0	Structure	2xok	1	E	0	100	91.8	41	509	-	A	0	99.6	89	61	545	-	P00830-P07251-EXP-2xok.pdb1-E-0-A-0.pdb
P00830	ATPB_YEAST	YJR121W	P07251	ATPA_YEAST	YBL099W	73	0	Structure	3oe7	2	N	0	100	92	39	508	-	K	0	99.4	89.7	56	544	-	P00830-P07251-EXP-3oe7.pdb2-N-0-K-0.pdb
P00830	ATPB_YEAST	YJR121W	P07251	ATPA_YEAST	YBL099W	74	0	Structure	3oe7	1	D	0	100	92	39	508	-	C	0	100	88.8	61	544	-	P00830-P07251-EXP-3oe7.pdb1-D-0-C-0.pdb
P00830	ATPB_YEAST	YJR121W	P07251	ATPA_YEAST	YBL099W	75	0	Structure	3oe7	2	O	0	100	91.6	40	507	-	K	0	99.4	89.7	56	544	-	P00830-P07251-EXP-3oe7.pdb2-O-0-K-0.pdb
P00830	ATPB_YEAST	YJR121W	P07251	ATPA_YEAST	YBL099W	76	0	Structure	3oe7	1	F	0	100	91.8	40	508	-	C	0	100	88.8	61	544	-	P00830-P07251-EXP-3oe7.pdb1-F-0-C-0.pdb
P00830	ATPB_YEAST	YJR121W	P07251	ATPA_YEAST	YBL099W	77	0	Structure	3oe7	2	M	0	100	92	39	508	-	L	0	99.6	88.8	61	544	-	P00830-P07251-EXP-3oe7.pdb2-M-0-L-0.pdb
P00830	ATPB_YEAST	YJR121W	P07251	ATPA_YEAST	YBL099W	78	0	Structure	3oe7	1	D	0	100	92	39	508	-	A	0	99.6	88.8	61	544	-	P00830-P07251-EXP-3oe7.pdb1-D-0-A-0.pdb
P00830	ATPB_YEAST	YJR121W	P07251	ATPA_YEAST	YBL099W	79	0	Structure	3oe7	1	F	0	100	91.8	40	508	-	B	0	99.6	89	60	544	-	P00830-P07251-EXP-3oe7.pdb1-F-0-B-0.pdb
P00830	ATPB_YEAST	YJR121W	P07251	ATPA_YEAST	YBL099W	80	0	Structure	3oe7	3	V	0	100	92	39	508	-	U	0	99.4	88.8	61	544	-	P00830-P07251-EXP-3oe7.pdb3-V-0-U-0.pdb
P00830	ATPB_YEAST	YJR121W	P07251	ATPA_YEAST	YBL099W	81	0	Structure	3oe7	2	M	0	100	92	39	508	-	J	0	99.4	88.8	61	544	-	P00830-P07251-EXP-3oe7.pdb2-M-0-J-0.pdb
P00830	ATPB_YEAST	YJR121W	P07251	ATPA_YEAST	YBL099W	82	0	Structure	3oe7	2	N	0	100	92	39	508	-	J	0	99.4	88.8	61	544	-	P00830-P07251-EXP-3oe7.pdb2-N-0-J-0.pdb
P00830	ATPB_YEAST	YJR121W	P07251	ATPA_YEAST	YBL099W	83	0	Structure	3oe7	1	E	0	100	91.6	41	508	-	B	0	99.6	89	60	544	-	P00830-P07251-EXP-3oe7.pdb1-E-0-B-0.pdb
P00830	ATPB_YEAST	YJR121W	P07251	ATPA_YEAST	YBL099W	84	0	Structure	3oe7	3	V	0	100	92	39	508	-	S	0	99.4	88.6	62	544	-	P00830-P07251-EXP-3oe7.pdb3-V-0-S-0.pdb
P00830	ATPB_YEAST	YJR121W	P07251	ATPA_YEAST	YBL099W	85	0	Structure	3oe7	3	X	0	100	91.8	40	508	-	U	0	99.4	88.8	61	544	-	P00830-P07251-EXP-3oe7.pdb3-X-0-U-0.pdb
P00830	ATPB_YEAST	YJR121W	P07251	ATPA_YEAST	YBL099W	86	0	Structure	3oe7	3	X	0	100	91.8	40	508	-	T	0	99.4	88.8	61	544	-	P00830-P07251-EXP-3oe7.pdb3-X-0-T-0.pdb
P00830	ATPB_YEAST	YJR121W	P07251	ATPA_YEAST	YBL099W	87	0	Structure	3oe7	2	O	0	100	91.6	40	507	-	L	0	99.6	88.8	61	544	-	P00830-P07251-EXP-3oe7.pdb2-O-0-L-0.pdb
P00830	ATPB_YEAST	YJR121W	P07251	ATPA_YEAST	YBL099W	88	0	Structure	3oe7	1	E	0	100	91.6	41	508	-	A	0	99.6	88.8	61	544	-	P00830-P07251-EXP-3oe7.pdb1-E-0-A-0.pdb
P00830	ATPB_YEAST	YJR121W	P07251	ATPA_YEAST	YBL099W	89	0	Structure	3oe7	3	W	0	100	91.4	41	507	-	T	0	99.4	88.8	61	544	-	P00830-P07251-EXP-3oe7.pdb3-W-0-T-0.pdb
P00830	ATPB_YEAST	YJR121W	P07251	ATPA_YEAST	YBL099W	90	0	Structure	3oe7	3	W	0	100	91.4	41	507	-	S	0	99.4	88.6	62	544	-	P00830-P07251-EXP-3oe7.pdb3-W-0-S-0.pdb
P00830	ATPB_YEAST	YJR121W	P07251	ATPA_YEAST	YBL099W	91	0	Structure	3ofn	1	D	0	100	92	39	508	-	A	0	99.8	89	61	545	-	P00830-P07251-EXP-3ofn.pdb1-D-0-A-0.pdb
P00830	ATPB_YEAST	YJR121W	P07251	ATPA_YEAST	YBL099W	92	0	Structure	3ofn	1	E	0	100	91.8	40	508	-	B	0	99.8	89.2	60	545	-	P00830-P07251-EXP-3ofn.pdb1-E-0-B-0.pdb
P00830	ATPB_YEAST	YJR121W	P07251	ATPA_YEAST	YBL099W	93	0	Structure	3ofn	1	F	0	100	91.8	40	508	-	B	0	99.8	89.2	60	545	-	P00830-P07251-EXP-3ofn.pdb1-F-0-B-0.pdb
P00830	ATPB_YEAST	YJR121W	P07251	ATPA_YEAST	YBL099W	94	0	Structure	3ofn	1	D	0	100	92	39	508	-	C	0	99.8	88.8	61	544	-	P00830-P07251-EXP-3ofn.pdb1-D-0-C-0.pdb
P00830	ATPB_YEAST	YJR121W	P07251	ATPA_YEAST	YBL099W	95	0	Structure	3ofn	1	E	0	100	91.8	40	508	-	A	0	99.8	89	61	545	-	P00830-P07251-EXP-3ofn.pdb1-E-0-A-0.pdb
P00830	ATPB_YEAST	YJR121W	P07251	ATPA_YEAST	YBL099W	96	0	Structure	3ofn	3	X	0	100	91.8	40	508	-	U	0	99.8	89	61	545	-	P00830-P07251-EXP-3ofn.pdb3-X-0-U-0.pdb
P00830	ATPB_YEAST	YJR121W	P07251	ATPA_YEAST	YBL099W	97	0	Structure	3ofn	3	X	0	100	91.8	40	508	-	T	0	99.4	89.2	60	545	-	P00830-P07251-EXP-3ofn.pdb3-X-0-T-0.pdb
P00830	ATPB_YEAST	YJR121W	P07251	ATPA_YEAST	YBL099W	98	0	Structure	3ofn	1	F	0	100	91.8	40	508	-	C	0	99.8	88.8	61	544	-	P00830-P07251-EXP-3ofn.pdb1-F-0-C-0.pdb
P00830	ATPB_YEAST	YJR121W	P07251	ATPA_YEAST	YBL099W	99	0	Structure	3ofn	2	O	0	100	91.8	40	508	-	K	0	99	89.4	56	542	-	P00830-P07251-EXP-3ofn.pdb2-O-0-K-0.pdb
P00830	ATPB_YEAST	YJR121W	P07251	ATPA_YEAST	YBL099W	100	0	Structure	3ofn	3	W	0	100	91.6	41	508	-	T	0	99.4	89.2	60	545	-	P00830-P07251-EXP-3ofn.pdb3-W-0-T-0.pdb
P00830	ATPB_YEAST	YJR121W	P07251	ATPA_YEAST	YBL099W	101	0	Structure	3ofn	3	W	0	100	91.6	41	508	-	S	0	99.4	89	61	545	-	P00830-P07251-EXP-3ofn.pdb3-W-0-S-0.pdb
P00830	ATPB_YEAST	YJR121W	P07251	ATPA_YEAST	YBL099W	102	0	Structure	3ofn	2	O	0	100	91.8	40	508	-	L	0	98.8	88.8	61	544	-	P00830-P07251-EXP-3ofn.pdb2-O-0-L-0.pdb
P00830	ATPB_YEAST	YJR121W	P07251	ATPA_YEAST	YBL099W	103	0	Structure	3ofn	2	N	0	98.9	91.6	41	508	-	K	0	99	89.4	56	542	-	P00830-P07251-EXP-3ofn.pdb2-N-0-K-0.pdb
P00830	ATPB_YEAST	YJR121W	P07251	ATPA_YEAST	YBL099W	104	0	Structure	3ofn	2	N	0	98.9	91.6	41	508	-	J	0	99.4	88.8	61	544	-	P00830-P07251-EXP-3ofn.pdb2-N-0-J-0.pdb
P00830	ATPB_YEAST	YJR121W	P07251	ATPA_YEAST	YBL099W	105	0	Structure	3ofn	2	M	0	100	90	40	499	-	J	0	99.4	88.8	61	544	-	P00830-P07251-EXP-3ofn.pdb2-M-0-J-0.pdb
P00830	ATPB_YEAST	YJR121W	P07251	ATPA_YEAST	YBL099W	106	0	Structure	3ofn	2	M	0	100	90	40	499	-	L	0	98.8	88.8	61	544	-	P00830-P07251-EXP-3ofn.pdb2-M-0-L-0.pdb
P00830	ATPB_YEAST	YJR121W	P07251	ATPA_YEAST	YBL099W	107	0	Structure	3ofn	3	V	0	96	73.4	40	414	-	U	0	99.8	89	61	545	-	P00830-P07251-EXP-3ofn.pdb3-V-0-U-0.pdb
P00830	ATPB_YEAST	YJR121W	P07251	ATPA_YEAST	YBL099W	108	0	Structure	3ofn	3	V	0	96	73.4	40	414	-	S	0	99.4	89	61	545	-	P00830-P07251-EXP-3ofn.pdb3-V-0-S-0.pdb
P00830	ATPB_YEAST	YJR121W	P07251	ATPA_YEAST	YBL099W	109	0	Structure	2wpd	1	E	0	100	92.6	39	511	-	B	0	100	89	60	544	-	P00830-P07251-EXP-2wpd.pdb1-E-0-B-0.pdb
P00830	ATPB_YEAST	YJR121W	P07251	ATPA_YEAST	YBL099W	110	0	Structure	2wpd	1	E	0	100	92.6	39	511	-	A	0	100	89	61	545	-	P00830-P07251-EXP-2wpd.pdb1-E-0-A-0.pdb
P00830	ATPB_YEAST	YJR121W	P07251	ATPA_YEAST	YBL099W	111	0	Structure	2wpd	1	F	0	100	92.4	40	511	-	B	0	100	89	60	544	-	P00830-P07251-EXP-2wpd.pdb1-F-0-B-0.pdb
P00830	ATPB_YEAST	YJR121W	P07251	ATPA_YEAST	YBL099W	112	0	Structure	2wpd	1	F	0	100	92.4	40	511	-	C	0	100	89	61	545	-	P00830-P07251-EXP-2wpd.pdb1-F-0-C-0.pdb
P00830	ATPB_YEAST	YJR121W	P07251	ATPA_YEAST	YBL099W	113	0	Structure	2wpd	1	D	0	100	92	39	508	-	C	0	100	89	61	545	-	P00830-P07251-EXP-2wpd.pdb1-D-0-C-0.pdb
P00830	ATPB_YEAST	YJR121W	P07251	ATPA_YEAST	YBL099W	114	0	Structure	2wpd	1	D	0	100	92	39	508	-	A	0	100	89	61	545	-	P00830-P07251-EXP-2wpd.pdb1-D-0-A-0.pdb
P00830	ATPB_YEAST	YJR121W	P07251	ATPA_YEAST	YBL099W	115	0	Structure	3fks	1	F	0	100	92.2	38	508	-	C	0	100	88.8	61	544	-	P00830-P07251-EXP-3fks.pdb1-F-0-C-0.pdb
P00830	ATPB_YEAST	YJR121W	P07251	ATPA_YEAST	YBL099W	116	0	Structure	3fks	2	O	0	100	91.8	40	508	-	K	0	99.2	89.5	53	540	-	P00830-P07251-EXP-3fks.pdb2-O-0-K-0.pdb
P00830	ATPB_YEAST	YJR121W	P07251	ATPA_YEAST	YBL099W	117	0	Structure	3fks	2	M	0	100	91.8	40	508	-	L	0	100	88.8	61	544	-	P00830-P07251-EXP-3fks.pdb2-M-0-L-0.pdb
P00830	ATPB_YEAST	YJR121W	P07251	ATPA_YEAST	YBL099W	118	0	Structure	3fks	2	O	0	100	91.8	40	508	-	L	0	100	88.8	61	544	-	P00830-P07251-EXP-3fks.pdb2-O-0-L-0.pdb
P00830	ATPB_YEAST	YJR121W	P07251	ATPA_YEAST	YBL099W	119	0	Structure	3fks	1	E	0	100	91.6	41	508	-	A	0	99.6	89.2	59	544	-	P00830-P07251-EXP-3fks.pdb1-E-0-A-0.pdb
P00830	ATPB_YEAST	YJR121W	P07251	ATPA_YEAST	YBL099W	120	0	Structure	3fks	1	D	0	99.4	91.8	39	507	-	A	0	99.6	89.2	59	544	-	P00830-P07251-EXP-3fks.pdb1-D-0-A-0.pdb
P00830	ATPB_YEAST	YJR121W	P07251	ATPA_YEAST	YBL099W	121	0	Structure	3fks	1	F	0	100	92.2	38	508	-	B	0	99.4	88.4	60	541	-	P00830-P07251-EXP-3fks.pdb1-F-0-B-0.pdb
P00830	ATPB_YEAST	YJR121W	P07251	ATPA_YEAST	YBL099W	122	0	Structure	3fks	2	M	0	100	91.8	40	508	-	J	0	99.4	88.8	61	544	-	P00830-P07251-EXP-3fks.pdb2-M-0-J-0.pdb
P00830	ATPB_YEAST	YJR121W	P07251	ATPA_YEAST	YBL099W	123	0	Structure	3fks	1	D	0	99.4	91.8	39	507	-	C	0	100	88.8	61	544	-	P00830-P07251-EXP-3fks.pdb1-D-0-C-0.pdb
P00830	ATPB_YEAST	YJR121W	P07251	ATPA_YEAST	YBL099W	124	0	Structure	3fks	2	N	0	99.8	91.4	41	507	-	K	0	99.2	89.5	53	540	-	P00830-P07251-EXP-3fks.pdb2-N-0-K-0.pdb
P00830	ATPB_YEAST	YJR121W	P07251	ATPA_YEAST	YBL099W	125	0	Structure	3fks	2	N	0	99.8	91.4	41	507	-	J	0	99.4	88.8	61	544	-	P00830-P07251-EXP-3fks.pdb2-N-0-J-0.pdb
P00830	ATPB_YEAST	YJR121W	P07251	ATPA_YEAST	YBL099W	126	0	Structure	3fks	1	E	0	100	91.6	41	508	-	B	0	99.4	88.4	60	541	-	P00830-P07251-EXP-3fks.pdb1-E-0-B-0.pdb
P00830	ATPB_YEAST	YJR121W	P07251	ATPA_YEAST	YBL099W	127	0	Structure	3fks	3	W	0	100	91.2	41	506	-	S	0	99.6	88.6	62	544	-	P00830-P07251-EXP-3fks.pdb3-W-0-S-0.pdb
P00830	ATPB_YEAST	YJR121W	P07251	ATPA_YEAST	YBL099W	128	0	Structure	3fks	3	X	0	100	91.8	40	508	-	U	0	98.6	88.8	61	544	-	P00830-P07251-EXP-3fks.pdb3-X-0-U-0.pdb
P00830	ATPB_YEAST	YJR121W	P07251	ATPA_YEAST	YBL099W	129	0	Structure	3fks	3	X	0	100	91.8	40	508	-	T	0	97.5	89	60	544	-	P00830-P07251-EXP-3fks.pdb3-X-0-T-0.pdb
P00830	ATPB_YEAST	YJR121W	P07251	ATPA_YEAST	YBL099W	130	0	Structure	3fks	3	W	0	100	91.2	41	506	-	T	0	97.5	89	60	544	-	P00830-P07251-EXP-3fks.pdb3-W-0-T-0.pdb
P00830	ATPB_YEAST	YJR121W	P07251	ATPA_YEAST	YBL099W	131	0	Structure	3fks	3	V	0	97.2	91.6	40	507	-	S	0	99.6	88.6	62	544	-	P00830-P07251-EXP-3fks.pdb3-V-0-S-0.pdb
P00830	ATPB_YEAST	YJR121W	P07251	ATPA_YEAST	YBL099W	132	0	Structure	3fks	3	V	0	97.2	91.6	40	507	-	U	0	98.6	88.8	61	544	-	P00830-P07251-EXP-3fks.pdb3-V-0-U-0.pdb
P00830	ATPB_YEAST	YJR121W	P07251	ATPA_YEAST	YBL099W	133	0	Structure	3zry	1	D	0	100	92.2	39	509	-	C	0	100	89	61	545	-	P00830-P07251-EXP-3zry.pdb1-D-0-C-0.pdb
P00830	ATPB_YEAST	YJR121W	P07251	ATPA_YEAST	YBL099W	134	0	Structure	3zry	1	F	0	100	92	40	509	-	C	0	100	89	61	545	-	P00830-P07251-EXP-3zry.pdb1-F-0-C-0.pdb
P00830	ATPB_YEAST	YJR121W	P07251	ATPA_YEAST	YBL099W	135	0	Structure	3zry	1	D	0	100	92.2	39	509	-	A	0	99.6	89	61	545	-	P00830-P07251-EXP-3zry.pdb1-D-0-A-0.pdb
P00830	ATPB_YEAST	YJR121W	P07251	ATPA_YEAST	YBL099W	136	0	Structure	3zry	1	F	0	100	92	40	509	-	B	0	99.6	89.2	60	545	-	P00830-P07251-EXP-3zry.pdb1-F-0-B-0.pdb
P00830	ATPB_YEAST	YJR121W	P07251	ATPA_YEAST	YBL099W	137	0	Structure	3zry	1	E	0	100	91.8	41	509	-	B	0	99.6	89.2	60	545	-	P00830-P07251-EXP-3zry.pdb1-E-0-B-0.pdb
P00830	ATPB_YEAST	YJR121W	P07251	ATPA_YEAST	YBL099W	138	0	Structure	3zry	1	E	0	100	91.8	41	509	-	A	0	99.6	89	61	545	-	P00830-P07251-EXP-3zry.pdb1-E-0-A-0.pdb
P00830	ATPB_YEAST	YJR121W	P07251	ATPA_YEAST	YBL099W	139	0	Structure	4b2q	1	e	0	100	92.6	39	511	-	b	0	100	89	60	544	-	P00830-P07251-EXP-4b2q.pdb1-e-0-b-0.pdb
P00830	ATPB_YEAST	YJR121W	P07251	ATPA_YEAST	YBL099W	140	0	Structure	4b2q	1	e	0	100	92.6	39	511	-	a	0	100	89	61	545	-	P00830-P07251-EXP-4b2q.pdb1-e-0-a-0.pdb
P00830	ATPB_YEAST	YJR121W	P07251	ATPA_YEAST	YBL099W	141	0	Structure	4b2q	1	E	0	100	92.6	39	511	-	A	0	100	89	61	545	-	P00830-P07251-EXP-4b2q.pdb1-E-0-A-0.pdb
P00830	ATPB_YEAST	YJR121W	P07251	ATPA_YEAST	YBL099W	142	0	Structure	4b2q	1	E	0	100	92.6	39	511	-	B	0	100	89	60	544	-	P00830-P07251-EXP-4b2q.pdb1-E-0-B-0.pdb
P00830	ATPB_YEAST	YJR121W	P07251	ATPA_YEAST	YBL099W	143	0	Structure	4b2q	1	F	0	100	92.4	40	511	-	B	0	100	89	60	544	-	P00830-P07251-EXP-4b2q.pdb1-F-0-B-0.pdb
P00830	ATPB_YEAST	YJR121W	P07251	ATPA_YEAST	YBL099W	144	0	Structure	4b2q	1	f	0	100	92.4	40	511	-	c	0	100	89	61	545	-	P00830-P07251-EXP-4b2q.pdb1-f-0-c-0.pdb
P00830	ATPB_YEAST	YJR121W	P07251	ATPA_YEAST	YBL099W	145	0	Structure	4b2q	1	F	0	100	92.4	40	511	-	C	0	100	89	61	545	-	P00830-P07251-EXP-4b2q.pdb1-F-0-C-0.pdb
P00830	ATPB_YEAST	YJR121W	P07251	ATPA_YEAST	YBL099W	146	0	Structure	4b2q	1	f	0	100	92.4	40	511	-	b	0	100	89	60	544	-	P00830-P07251-EXP-4b2q.pdb1-f-0-b-0.pdb
P00830	ATPB_YEAST	YJR121W	P07251	ATPA_YEAST	YBL099W	147	0	Structure	4b2q	1	d	0	100	92	39	508	-	c	0	100	89	61	545	-	P00830-P07251-EXP-4b2q.pdb1-d-0-c-0.pdb
P00830	ATPB_YEAST	YJR121W	P07251	ATPA_YEAST	YBL099W	148	0	Structure	4b2q	1	D	0	100	92	39	508	-	A	0	100	89	61	545	-	P00830-P07251-EXP-4b2q.pdb1-D-0-A-0.pdb
P00830	ATPB_YEAST	YJR121W	P07251	ATPA_YEAST	YBL099W	149	0	Structure	4b2q	1	D	0	100	92	39	508	-	C	0	100	89	61	545	-	P00830-P07251-EXP-4b2q.pdb1-D-0-C-0.pdb
P00830	ATPB_YEAST	YJR121W	P07251	ATPA_YEAST	YBL099W	150	0	Structure	4b2q	1	d	0	100	92	39	508	-	a	0	100	89	61	545	-	P00830-P07251-EXP-4b2q.pdb1-d-0-a-0.pdb
P07251	ATPA_YEAST	YBL099W	P38077	ATPG_YEAST	YBR039W	1	0	Structure	3zia	2	A	0	100	88.8	61	544	-	G	0	96	88.7	34	309	-	P07251-P38077-EXP-3zia.pdb2-A-0-G-0.pdb
P07251	ATPA_YEAST	YBL099W	P38077	ATPG_YEAST	YBR039W	2	0	Structure	3zia	1	M	0	100	88.8	61	544	-	Q	0	96	88.7	34	309	-	P07251-P38077-EXP-3zia.pdb1-M-0-Q-0.pdb
P07251	ATPA_YEAST	YBL099W	P38077	ATPG_YEAST	YBR039W	3	0	Structure	3zia	2	C	0	100	88.8	61	544	-	G	0	96	88.7	34	309	-	P07251-P38077-EXP-3zia.pdb2-C-0-G-0.pdb
P07251	ATPA_YEAST	YBL099W	P38077	ATPG_YEAST	YBR039W	4	0	Structure	3zia	1	K	0	100	88.8	61	544	-	Q	0	96	88.7	34	309	-	P07251-P38077-EXP-3zia.pdb1-K-0-Q-0.pdb
P07251	ATPA_YEAST	YBL099W	P38077	ATPG_YEAST	YBR039W	5	0	Structure	3zia	2	B	0	99	89	60	544	-	G	0	96	88.7	34	309	-	P07251-P38077-EXP-3zia.pdb2-B-0-G-0.pdb
P07251	ATPA_YEAST	YBL099W	P38077	ATPG_YEAST	YBR039W	6	0	Structure	3zia	1	L	0	99	89	60	544	-	Q	0	96	88.7	34	309	-	P07251-P38077-EXP-3zia.pdb1-L-0-Q-0.pdb
P07251	ATPA_YEAST	YBL099W	P38077	ATPG_YEAST	YBR039W	7	0	Structure	3oee	1	C	0	99.8	88.8	61	544	-	G	0	96.4	88.7	34	309	-	P07251-P38077-EXP-3oee.pdb1-C-0-G-0.pdb
P07251	ATPA_YEAST	YBL099W	P38077	ATPG_YEAST	YBR039W	8	0	Structure	3oee	1	B	0	99.4	89	60	544	-	G	0	96.4	88.7	34	309	-	P07251-P38077-EXP-3oee.pdb1-B-0-G-0.pdb
P07251	ATPA_YEAST	YBL099W	P38077	ATPG_YEAST	YBR039W	9	0	Structure	3oee	1	A	0	99.4	88.8	61	544	-	G	0	96.4	88.7	34	309	-	P07251-P38077-EXP-3oee.pdb1-A-0-G-0.pdb
P07251	ATPA_YEAST	YBL099W	P38077	ATPG_YEAST	YBR039W	10	0	Structure	3oee	2	K	0	99.2	89.7	56	544	-	P	0	88.4	88.7	34	309	-	P07251-P38077-EXP-3oee.pdb2-K-0-P-0.pdb
P07251	ATPA_YEAST	YBL099W	P38077	ATPG_YEAST	YBR039W	11	0	Structure	3oee	2	L	0	99.4	88.8	61	544	-	P	0	88.4	88.7	34	309	-	P07251-P38077-EXP-3oee.pdb2-L-0-P-0.pdb
P07251	ATPA_YEAST	YBL099W	P38077	ATPG_YEAST	YBR039W	12	0	Structure	3oee	2	J	0	99.2	88.8	61	544	-	P	0	88.4	88.7	34	309	-	P07251-P38077-EXP-3oee.pdb2-J-0-P-0.pdb
P07251	ATPA_YEAST	YBL099W	P38077	ATPG_YEAST	YBR039W	13	0	Structure	3oee	3	U	0	99.2	88.8	61	544	-	Y	0	72.7	88.4	34	308	-	P07251-P38077-EXP-3oee.pdb3-U-0-Y-0.pdb
P07251	ATPA_YEAST	YBL099W	P38077	ATPG_YEAST	YBR039W	14	0	Structure	3oee	3	T	0	98.6	88.8	61	544	-	Y	0	72.7	88.4	34	308	-	P07251-P38077-EXP-3oee.pdb3-T-0-Y-0.pdb
P07251	ATPA_YEAST	YBL099W	P38077	ATPG_YEAST	YBR039W	15	0	Structure	3oee	3	S	0	98.6	88.6	62	544	-	Y	0	72.7	88.4	34	308	-	P07251-P38077-EXP-3oee.pdb3-S-0-Y-0.pdb
P07251	ATPA_YEAST	YBL099W	P38077	ATPG_YEAST	YBR039W	16	0	Structure	2hld	1	C	0	100	88.8	61	544	-	G	0	96	88.7	34	309	-	P07251-P38077-EXP-2hld.pdb1-C-0-G-0.pdb
P07251	ATPA_YEAST	YBL099W	P38077	ATPG_YEAST	YBR039W	17	0	Structure	2hld	1	B	0	99.6	89	60	544	-	G	0	96	88.7	34	309	-	P07251-P38077-EXP-2hld.pdb1-B-0-G-0.pdb
P07251	ATPA_YEAST	YBL099W	P38077	ATPG_YEAST	YBR039W	18	0	Structure	2hld	1	A	0	99.6	88.8	61	544	-	G	0	96	88.7	34	309	-	P07251-P38077-EXP-2hld.pdb1-A-0-G-0.pdb
P07251	ATPA_YEAST	YBL099W	P38077	ATPG_YEAST	YBR039W	19	0	Structure	2hld	2	K	0	99.4	89.7	56	544	-	P	0	88	88.7	34	309	-	P07251-P38077-EXP-2hld.pdb2-K-0-P-0.pdb
P07251	ATPA_YEAST	YBL099W	P38077	ATPG_YEAST	YBR039W	20	0	Structure	2hld	2	L	0	99.6	88.8	61	544	-	P	0	88	88.7	34	309	-	P07251-P38077-EXP-2hld.pdb2-L-0-P-0.pdb
P07251	ATPA_YEAST	YBL099W	P38077	ATPG_YEAST	YBR039W	21	0	Structure	2hld	2	J	0	99.4	88.8	61	544	-	P	0	88	88.7	34	309	-	P07251-P38077-EXP-2hld.pdb2-J-0-P-0.pdb
P07251	ATPA_YEAST	YBL099W	P38077	ATPG_YEAST	YBR039W	22	0	Structure	2hld	3	U	0	99.4	88.8	61	544	-	Y	0	72.7	88.4	34	308	-	P07251-P38077-EXP-2hld.pdb3-U-0-Y-0.pdb
P07251	ATPA_YEAST	YBL099W	P38077	ATPG_YEAST	YBR039W	23	0	Structure	2hld	3	T	0	99.4	88.8	61	544	-	Y	0	72.7	88.4	34	308	-	P07251-P38077-EXP-2hld.pdb3-T-0-Y-0.pdb
P07251	ATPA_YEAST	YBL099W	P38077	ATPG_YEAST	YBR039W	24	0	Structure	2hld	3	S	0	99.4	88.6	62	544	-	Y	0	72.7	88.4	34	308	-	P07251-P38077-EXP-2hld.pdb3-S-0-Y-0.pdb
P07251	ATPA_YEAST	YBL099W	P38077	ATPG_YEAST	YBR039W	25	0	Structure	3oeh	1	C	0	100	88.8	61	544	-	G	0	96.4	88.7	34	309	-	P07251-P38077-EXP-3oeh.pdb1-C-0-G-0.pdb
P07251	ATPA_YEAST	YBL099W	P38077	ATPG_YEAST	YBR039W	26	0	Structure	3oeh	1	B	0	99.6	89	60	544	-	G	0	96.4	88.7	34	309	-	P07251-P38077-EXP-3oeh.pdb1-B-0-G-0.pdb
P07251	ATPA_YEAST	YBL099W	P38077	ATPG_YEAST	YBR039W	27	0	Structure	3oeh	1	A	0	99.6	88.8	61	544	-	G	0	96.4	88.7	34	309	-	P07251-P38077-EXP-3oeh.pdb1-A-0-G-0.pdb
P07251	ATPA_YEAST	YBL099W	P38077	ATPG_YEAST	YBR039W	28	0	Structure	3oeh	2	K	0	99.4	89.7	56	544	-	P	0	89.1	88.7	34	309	-	P07251-P38077-EXP-3oeh.pdb2-K-0-P-0.pdb
P07251	ATPA_YEAST	YBL099W	P38077	ATPG_YEAST	YBR039W	29	0	Structure	3oeh	2	L	0	99.6	88.8	61	544	-	P	0	89.1	88.7	34	309	-	P07251-P38077-EXP-3oeh.pdb2-L-0-P-0.pdb
P07251	ATPA_YEAST	YBL099W	P38077	ATPG_YEAST	YBR039W	30	0	Structure	3oeh	2	J	0	99.4	88.8	61	544	-	P	0	89.1	88.7	34	309	-	P07251-P38077-EXP-3oeh.pdb2-J-0-P-0.pdb
P07251	ATPA_YEAST	YBL099W	P38077	ATPG_YEAST	YBR039W	31	0	Structure	2xok	1	C	0	100	89	61	545	-	G	0	96	89.1	34	310	-	P07251-P38077-EXP-2xok.pdb1-C-0-G-0.pdb
P07251	ATPA_YEAST	YBL099W	P38077	ATPG_YEAST	YBR039W	32	0	Structure	2xok	1	B	0	99.6	89.2	60	545	-	G	0	96	89.1	34	310	-	P07251-P38077-EXP-2xok.pdb1-B-0-G-0.pdb
P07251	ATPA_YEAST	YBL099W	P38077	ATPG_YEAST	YBR039W	33	0	Structure	2xok	1	A	0	99.6	89	61	545	-	G	0	96	89.1	34	310	-	P07251-P38077-EXP-2xok.pdb1-A-0-G-0.pdb
P07251	ATPA_YEAST	YBL099W	P38077	ATPG_YEAST	YBR039W	34	0	Structure	3oeh	3	U	0	99.4	88.8	61	544	-	Y	0	73.1	88.4	34	308	-	P07251-P38077-EXP-3oeh.pdb3-U-0-Y-0.pdb
P07251	ATPA_YEAST	YBL099W	P38077	ATPG_YEAST	YBR039W	35	0	Structure	3oeh	3	T	0	99	88.8	61	544	-	Y	0	73.1	88.4	34	308	-	P07251-P38077-EXP-3oeh.pdb3-T-0-Y-0.pdb
P07251	ATPA_YEAST	YBL099W	P38077	ATPG_YEAST	YBR039W	36	0	Structure	3oeh	3	S	0	99	88.6	62	544	-	Y	0	73.1	88.4	34	308	-	P07251-P38077-EXP-3oeh.pdb3-S-0-Y-0.pdb
P07251	ATPA_YEAST	YBL099W	P38077	ATPG_YEAST	YBR039W	37	0	Structure	3oe7	1	C	0	100	88.8	61	544	-	G	0	95.7	88.7	34	309	-	P07251-P38077-EXP-3oe7.pdb1-C-0-G-0.pdb
P07251	ATPA_YEAST	YBL099W	P38077	ATPG_YEAST	YBR039W	38	0	Structure	3oe7	1	B	0	99.6	89	60	544	-	G	0	95.7	88.7	34	309	-	P07251-P38077-EXP-3oe7.pdb1-B-0-G-0.pdb
P07251	ATPA_YEAST	YBL099W	P38077	ATPG_YEAST	YBR039W	39	0	Structure	3oe7	1	A	0	99.6	88.8	61	544	-	G	0	95.7	88.7	34	309	-	P07251-P38077-EXP-3oe7.pdb1-A-0-G-0.pdb
P07251	ATPA_YEAST	YBL099W	P38077	ATPG_YEAST	YBR039W	40	0	Structure	3oe7	2	K	0	99.4	89.7	56	544	-	P	0	88	88.7	34	309	-	P07251-P38077-EXP-3oe7.pdb2-K-0-P-0.pdb
P07251	ATPA_YEAST	YBL099W	P38077	ATPG_YEAST	YBR039W	41	0	Structure	3oe7	2	L	0	99.6	88.8	61	544	-	P	0	88	88.7	34	309	-	P07251-P38077-EXP-3oe7.pdb2-L-0-P-0.pdb
P07251	ATPA_YEAST	YBL099W	P38077	ATPG_YEAST	YBR039W	42	0	Structure	3oe7	2	J	0	99.4	88.8	61	544	-	P	0	88	88.7	34	309	-	P07251-P38077-EXP-3oe7.pdb2-J-0-P-0.pdb
P07251	ATPA_YEAST	YBL099W	P38077	ATPG_YEAST	YBR039W	43	0	Structure	3ofn	1	B	0	99.8	89.2	60	545	-	G	0	97.1	88.7	34	309	-	P07251-P38077-EXP-3ofn.pdb1-B-0-G-0.pdb
P07251	ATPA_YEAST	YBL099W	P38077	ATPG_YEAST	YBR039W	44	0	Structure	3ofn	1	A	0	99.8	89	61	545	-	G	0	97.1	88.7	34	309	-	P07251-P38077-EXP-3ofn.pdb1-A-0-G-0.pdb
P07251	ATPA_YEAST	YBL099W	P38077	ATPG_YEAST	YBR039W	45	0	Structure	3ofn	1	C	0	99.8	88.8	61	544	-	G	0	97.1	88.7	34	309	-	P07251-P38077-EXP-3ofn.pdb1-C-0-G-0.pdb
P07251	ATPA_YEAST	YBL099W	P38077	ATPG_YEAST	YBR039W	46	0	Structure	3ofn	2	K	0	99	89.4	56	542	-	P	0	97.1	88.7	34	309	-	P07251-P38077-EXP-3ofn.pdb2-K-0-P-0.pdb
P07251	ATPA_YEAST	YBL099W	P38077	ATPG_YEAST	YBR039W	47	0	Structure	3ofn	2	J	0	99.4	88.8	61	544	-	P	0	97.1	88.7	34	309	-	P07251-P38077-EXP-3ofn.pdb2-J-0-P-0.pdb
P07251	ATPA_YEAST	YBL099W	P38077	ATPG_YEAST	YBR039W	48	0	Structure	3ofn	2	L	0	98.8	88.8	61	544	-	P	0	97.1	88.7	34	309	-	P07251-P38077-EXP-3ofn.pdb2-L-0-P-0.pdb
P07251	ATPA_YEAST	YBL099W	P38077	ATPG_YEAST	YBR039W	49	0	Structure	3oe7	3	T	0	99.4	88.8	61	544	-	Y	0	71.6	88.4	34	308	-	P07251-P38077-EXP-3oe7.pdb3-T-0-Y-0.pdb
P07251	ATPA_YEAST	YBL099W	P38077	ATPG_YEAST	YBR039W	50	0	Structure	3oe7	3	U	0	99.4	88.8	61	544	-	Y	0	71.6	88.4	34	308	-	P07251-P38077-EXP-3oe7.pdb3-U-0-Y-0.pdb
P07251	ATPA_YEAST	YBL099W	P38077	ATPG_YEAST	YBR039W	51	0	Structure	3oe7	3	S	0	99.4	88.6	62	544	-	Y	0	71.6	88.4	34	308	-	P07251-P38077-EXP-3oe7.pdb3-S-0-Y-0.pdb
P07251	ATPA_YEAST	YBL099W	P38077	ATPG_YEAST	YBR039W	52	0	Structure	3ofn	3	U	0	99.8	89	61	545	-	Y	0	84	26	229	309	-	P07251-P38077-EXP-3ofn.pdb3-U-0-Y-0.pdb
P07251	ATPA_YEAST	YBL099W	P38077	ATPG_YEAST	YBR039W	53	0	Structure	3ofn	3	T	0	99.4	89.2	60	545	-	Y	0	84	26	229	309	-	P07251-P38077-EXP-3ofn.pdb3-T-0-Y-0.pdb
P07251	ATPA_YEAST	YBL099W	P38077	ATPG_YEAST	YBR039W	54	0	Structure	3ofn	3	S	0	99.4	89	61	545	-	Y	0	84	26	229	309	-	P07251-P38077-EXP-3ofn.pdb3-S-0-Y-0.pdb
P07251	ATPA_YEAST	YBL099W	P38077	ATPG_YEAST	YBR039W	55	0	Structure	2wpd	1	C	0	100	89	61	545	-	G	0	96.8	89.4	34	311	-	P07251-P38077-EXP-2wpd.pdb1-C-0-G-0.pdb
P07251	ATPA_YEAST	YBL099W	P38077	ATPG_YEAST	YBR039W	56	0	Structure	2wpd	1	B	0	100	89	60	544	-	G	0	96.8	89.4	34	311	-	P07251-P38077-EXP-2wpd.pdb1-B-0-G-0.pdb
P07251	ATPA_YEAST	YBL099W	P38077	ATPG_YEAST	YBR039W	57	0	Structure	2wpd	1	A	0	100	89	61	545	-	G	0	96.8	89.4	34	311	-	P07251-P38077-EXP-2wpd.pdb1-A-0-G-0.pdb
P07251	ATPA_YEAST	YBL099W	P38077	ATPG_YEAST	YBR039W	58	0	Structure	3fks	1	A	0	99.6	89.2	59	544	-	G	0	97.1	88.7	34	309	-	P07251-P38077-EXP-3fks.pdb1-A-0-G-0.pdb
P07251	ATPA_YEAST	YBL099W	P38077	ATPG_YEAST	YBR039W	59	0	Structure	3fks	1	C	0	100	88.8	61	544	-	G	0	97.1	88.7	34	309	-	P07251-P38077-EXP-3fks.pdb1-C-0-G-0.pdb
P07251	ATPA_YEAST	YBL099W	P38077	ATPG_YEAST	YBR039W	60	0	Structure	3fks	1	B	0	99.4	88.4	60	541	-	G	0	97.1	88.7	34	309	-	P07251-P38077-EXP-3fks.pdb1-B-0-G-0.pdb
P07251	ATPA_YEAST	YBL099W	P38077	ATPG_YEAST	YBR039W	61	0	Structure	3fks	2	K	0	99.2	89.5	53	540	-	P	0	85.1	88.7	34	309	-	P07251-P38077-EXP-3fks.pdb2-K-0-P-0.pdb
P07251	ATPA_YEAST	YBL099W	P38077	ATPG_YEAST	YBR039W	62	0	Structure	3fks	2	L	0	100	88.8	61	544	-	P	0	85.1	88.7	34	309	-	P07251-P38077-EXP-3fks.pdb2-L-0-P-0.pdb
P07251	ATPA_YEAST	YBL099W	P38077	ATPG_YEAST	YBR039W	63	0	Structure	3fks	2	J	0	99.4	88.8	61	544	-	P	0	85.1	88.7	34	309	-	P07251-P38077-EXP-3fks.pdb2-J-0-P-0.pdb
P07251	ATPA_YEAST	YBL099W	P38077	ATPG_YEAST	YBR039W	64	0	Structure	3fks	3	S	0	99.6	88.6	62	544	-	Y	0	67.8	88.7	34	309	-	P07251-P38077-EXP-3fks.pdb3-S-0-Y-0.pdb
P07251	ATPA_YEAST	YBL099W	P38077	ATPG_YEAST	YBR039W	65	0	Structure	3fks	3	U	0	98.6	88.8	61	544	-	Y	0	67.8	88.7	34	309	-	P07251-P38077-EXP-3fks.pdb3-U-0-Y-0.pdb
P07251	ATPA_YEAST	YBL099W	P38077	ATPG_YEAST	YBR039W	66	0	Structure	3fks	3	T	0	97.5	89	60	544	-	Y	0	67.8	88.7	34	309	-	P07251-P38077-EXP-3fks.pdb3-T-0-Y-0.pdb
P07251	ATPA_YEAST	YBL099W	P38077	ATPG_YEAST	YBR039W	67	0	Structure	3zry	1	C	0	100	89	61	545	-	G	0	96	89.1	34	310	-	P07251-P38077-EXP-3zry.pdb1-C-0-G-0.pdb
P07251	ATPA_YEAST	YBL099W	P38077	ATPG_YEAST	YBR039W	68	0	Structure	3zry	1	B	0	99.6	89.2	60	545	-	G	0	96	89.1	34	310	-	P07251-P38077-EXP-3zry.pdb1-B-0-G-0.pdb
P07251	ATPA_YEAST	YBL099W	P38077	ATPG_YEAST	YBR039W	69	0	Structure	3zry	1	A	0	99.6	89	61	545	-	G	0	96	89.1	34	310	-	P07251-P38077-EXP-3zry.pdb1-A-0-G-0.pdb
P07251	ATPA_YEAST	YBL099W	P38077	ATPG_YEAST	YBR039W	70	0	Structure	4b2q	1	c	0	100	89	61	545	-	g	0	96.8	89.4	34	311	-	P07251-P38077-EXP-4b2q.pdb1-c-0-g-0.pdb
P07251	ATPA_YEAST	YBL099W	P38077	ATPG_YEAST	YBR039W	71	0	Structure	4b2q	1	a	0	100	89	61	545	-	g	0	96.8	89.4	34	311	-	P07251-P38077-EXP-4b2q.pdb1-a-0-g-0.pdb
P07251	ATPA_YEAST	YBL099W	P38077	ATPG_YEAST	YBR039W	72	0	Structure	4b2q	1	b	0	100	89	60	544	-	g	0	96.8	89.4	34	311	-	P07251-P38077-EXP-4b2q.pdb1-b-0-g-0.pdb
P07251	ATPA_YEAST	YBL099W	P38077	ATPG_YEAST	YBR039W	73	0	Structure	4b2q	1	C	0	100	89	61	545	-	G	0	96.8	89.4	34	311	-	P07251-P38077-EXP-4b2q.pdb1-C-0-G-0.pdb
P07251	ATPA_YEAST	YBL099W	P38077	ATPG_YEAST	YBR039W	74	0	Structure	4b2q	1	A	0	100	89	61	545	-	G	0	96.8	89.4	34	311	-	P07251-P38077-EXP-4b2q.pdb1-A-0-G-0.pdb
P07251	ATPA_YEAST	YBL099W	P38077	ATPG_YEAST	YBR039W	75	0	Structure	4b2q	1	B	0	100	89	60	544	-	G	0	96.8	89.4	34	311	-	P07251-P38077-EXP-4b2q.pdb1-B-0-G-0.pdb
P00830	ATPB_YEAST	YJR121W	P38077	ATPG_YEAST	YBR039W	1	0	Structure	3zia	1	N	0	100	92	39	508	-	Q	0	96	88.7	34	309	-	P00830-P38077-EXP-3zia.pdb1-N-0-Q-0.pdb
P00830	ATPB_YEAST	YJR121W	P38077	ATPG_YEAST	YBR039W	2	0	Structure	3zia	2	D	0	100	92	39	508	-	G	0	96	88.7	34	309	-	P00830-P38077-EXP-3zia.pdb2-D-0-G-0.pdb
P00830	ATPB_YEAST	YJR121W	P38077	ATPG_YEAST	YBR039W	3	0	Structure	3zia	1	P	0	100	91.8	40	508	-	Q	0	96	88.7	34	309	-	P00830-P38077-EXP-3zia.pdb1-P-0-Q-0.pdb
P00830	ATPB_YEAST	YJR121W	P38077	ATPG_YEAST	YBR039W	4	0	Structure	3zia	2	F	0	100	91.8	40	508	-	G	0	96	88.7	34	309	-	P00830-P38077-EXP-3zia.pdb2-F-0-G-0.pdb
P00830	ATPB_YEAST	YJR121W	P38077	ATPG_YEAST	YBR039W	5	0	Structure	3zia	1	O	0	100	91.6	41	508	-	Q	0	96	88.7	34	309	-	P00830-P38077-EXP-3zia.pdb1-O-0-Q-0.pdb
P00830	ATPB_YEAST	YJR121W	P38077	ATPG_YEAST	YBR039W	6	0	Structure	3zia	2	E	0	100	91.6	41	508	-	G	0	96	88.7	34	309	-	P00830-P38077-EXP-3zia.pdb2-E-0-G-0.pdb
P00830	ATPB_YEAST	YJR121W	P38077	ATPG_YEAST	YBR039W	7	0	Structure	3oee	1	D	0	100	92	39	508	-	G	0	96.4	88.7	34	309	-	P00830-P38077-EXP-3oee.pdb1-D-0-G-0.pdb
P00830	ATPB_YEAST	YJR121W	P38077	ATPG_YEAST	YBR039W	8	0	Structure	3oee	1	F	0	100	91.8	40	508	-	G	0	96.4	88.7	34	309	-	P00830-P38077-EXP-3oee.pdb1-F-0-G-0.pdb
P00830	ATPB_YEAST	YJR121W	P38077	ATPG_YEAST	YBR039W	9	0	Structure	3oee	1	E	0	100	91.6	41	508	-	G	0	96.4	88.7	34	309	-	P00830-P38077-EXP-3oee.pdb1-E-0-G-0.pdb
P00830	ATPB_YEAST	YJR121W	P38077	ATPG_YEAST	YBR039W	10	0	Structure	3oee	2	N	0	100	92	39	508	-	P	0	88.4	88.7	34	309	-	P00830-P38077-EXP-3oee.pdb2-N-0-P-0.pdb
P00830	ATPB_YEAST	YJR121W	P38077	ATPG_YEAST	YBR039W	11	0	Structure	3oee	2	M	0	100	92	39	508	-	P	0	88.4	88.7	34	309	-	P00830-P38077-EXP-3oee.pdb2-M-0-P-0.pdb
P00830	ATPB_YEAST	YJR121W	P38077	ATPG_YEAST	YBR039W	12	0	Structure	3oee	2	O	0	100	91.6	40	507	-	P	0	88.4	88.7	34	309	-	P00830-P38077-EXP-3oee.pdb2-O-0-P-0.pdb
P00830	ATPB_YEAST	YJR121W	P38077	ATPG_YEAST	YBR039W	13	0	Structure	3oee	3	V	0	100	92	39	508	-	Y	0	72.7	88.4	34	308	-	P00830-P38077-EXP-3oee.pdb3-V-0-Y-0.pdb
P00830	ATPB_YEAST	YJR121W	P38077	ATPG_YEAST	YBR039W	14	0	Structure	3oee	3	X	0	100	91.8	40	508	-	Y	0	72.7	88.4	34	308	-	P00830-P38077-EXP-3oee.pdb3-X-0-Y-0.pdb
P00830	ATPB_YEAST	YJR121W	P38077	ATPG_YEAST	YBR039W	15	0	Structure	3oee	3	W	0	100	91.4	41	507	-	Y	0	72.7	88.4	34	308	-	P00830-P38077-EXP-3oee.pdb3-W-0-Y-0.pdb
P00830	ATPB_YEAST	YJR121W	P38077	ATPG_YEAST	YBR039W	16	0	Structure	2hld	1	D	0	100	92	39	508	-	G	0	96	88.7	34	309	-	P00830-P38077-EXP-2hld.pdb1-D-0-G-0.pdb
P00830	ATPB_YEAST	YJR121W	P38077	ATPG_YEAST	YBR039W	17	0	Structure	2hld	1	F	0	100	91.8	40	508	-	G	0	96	88.7	34	309	-	P00830-P38077-EXP-2hld.pdb1-F-0-G-0.pdb
P00830	ATPB_YEAST	YJR121W	P38077	ATPG_YEAST	YBR039W	18	0	Structure	2hld	1	E	0	100	91.6	41	508	-	G	0	96	88.7	34	309	-	P00830-P38077-EXP-2hld.pdb1-E-0-G-0.pdb
P00830	ATPB_YEAST	YJR121W	P38077	ATPG_YEAST	YBR039W	19	0	Structure	2hld	2	N	0	100	92	39	508	-	P	0	88	88.7	34	309	-	P00830-P38077-EXP-2hld.pdb2-N-0-P-0.pdb
P00830	ATPB_YEAST	YJR121W	P38077	ATPG_YEAST	YBR039W	20	0	Structure	2hld	2	M	0	100	92	39	508	-	P	0	88	88.7	34	309	-	P00830-P38077-EXP-2hld.pdb2-M-0-P-0.pdb
P00830	ATPB_YEAST	YJR121W	P38077	ATPG_YEAST	YBR039W	21	0	Structure	2hld	2	O	0	100	91.6	40	507	-	P	0	88	88.7	34	309	-	P00830-P38077-EXP-2hld.pdb2-O-0-P-0.pdb
P00830	ATPB_YEAST	YJR121W	P38077	ATPG_YEAST	YBR039W	22	0	Structure	2hld	3	V	0	100	92	39	508	-	Y	0	72.7	88.4	34	308	-	P00830-P38077-EXP-2hld.pdb3-V-0-Y-0.pdb
P00830	ATPB_YEAST	YJR121W	P38077	ATPG_YEAST	YBR039W	23	0	Structure	2hld	3	X	0	100	91.8	40	508	-	Y	0	72.7	88.4	34	308	-	P00830-P38077-EXP-2hld.pdb3-X-0-Y-0.pdb
P00830	ATPB_YEAST	YJR121W	P38077	ATPG_YEAST	YBR039W	24	0	Structure	2hld	3	W	0	100	91.4	41	507	-	Y	0	72.7	88.4	34	308	-	P00830-P38077-EXP-2hld.pdb3-W-0-Y-0.pdb
P00830	ATPB_YEAST	YJR121W	P38077	ATPG_YEAST	YBR039W	25	0	Structure	3oeh	1	D	0	99.8	92	39	508	-	G	0	96.4	88.7	34	309	-	P00830-P38077-EXP-3oeh.pdb1-D-0-G-0.pdb
P00830	ATPB_YEAST	YJR121W	P38077	ATPG_YEAST	YBR039W	26	0	Structure	3oeh	1	F	0	99.8	91.8	40	508	-	G	0	96.4	88.7	34	309	-	P00830-P38077-EXP-3oeh.pdb1-F-0-G-0.pdb
P00830	ATPB_YEAST	YJR121W	P38077	ATPG_YEAST	YBR039W	27	0	Structure	3oeh	1	E	0	99.8	91.6	41	508	-	G	0	96.4	88.7	34	309	-	P00830-P38077-EXP-3oeh.pdb1-E-0-G-0.pdb
P00830	ATPB_YEAST	YJR121W	P38077	ATPG_YEAST	YBR039W	28	0	Structure	3oeh	2	M	0	99.8	92	39	508	-	P	0	89.1	88.7	34	309	-	P00830-P38077-EXP-3oeh.pdb2-M-0-P-0.pdb
P00830	ATPB_YEAST	YJR121W	P38077	ATPG_YEAST	YBR039W	29	0	Structure	3oeh	2	N	0	99.8	92	39	508	-	P	0	89.1	88.7	34	309	-	P00830-P38077-EXP-3oeh.pdb2-N-0-P-0.pdb
P00830	ATPB_YEAST	YJR121W	P38077	ATPG_YEAST	YBR039W	30	0	Structure	3oeh	2	O	0	99.8	91.6	40	507	-	P	0	89.1	88.7	34	309	-	P00830-P38077-EXP-3oeh.pdb2-O-0-P-0.pdb
P00830	ATPB_YEAST	YJR121W	P38077	ATPG_YEAST	YBR039W	31	0	Structure	2xok	1	D	0	100	92.2	39	509	-	G	0	96	89.1	34	310	-	P00830-P38077-EXP-2xok.pdb1-D-0-G-0.pdb
P00830	ATPB_YEAST	YJR121W	P38077	ATPG_YEAST	YBR039W	32	0	Structure	2xok	1	F	0	100	92	40	509	-	G	0	96	89.1	34	310	-	P00830-P38077-EXP-2xok.pdb1-F-0-G-0.pdb
P00830	ATPB_YEAST	YJR121W	P38077	ATPG_YEAST	YBR039W	33	0	Structure	2xok	1	E	0	100	91.8	41	509	-	G	0	96	89.1	34	310	-	P00830-P38077-EXP-2xok.pdb1-E-0-G-0.pdb
P00830	ATPB_YEAST	YJR121W	P38077	ATPG_YEAST	YBR039W	34	0	Structure	3oeh	3	V	0	99.8	92	39	508	-	Y	0	73.1	88.4	34	308	-	P00830-P38077-EXP-3oeh.pdb3-V-0-Y-0.pdb
P00830	ATPB_YEAST	YJR121W	P38077	ATPG_YEAST	YBR039W	35	0	Structure	3oeh	3	X	0	99.8	91.8	40	508	-	Y	0	73.1	88.4	34	308	-	P00830-P38077-EXP-3oeh.pdb3-X-0-Y-0.pdb
P00830	ATPB_YEAST	YJR121W	P38077	ATPG_YEAST	YBR039W	36	0	Structure	3oeh	3	W	0	99.8	91.4	41	507	-	Y	0	73.1	88.4	34	308	-	P00830-P38077-EXP-3oeh.pdb3-W-0-Y-0.pdb
P00830	ATPB_YEAST	YJR121W	P38077	ATPG_YEAST	YBR039W	37	0	Structure	3oe7	1	D	0	100	92	39	508	-	G	0	95.7	88.7	34	309	-	P00830-P38077-EXP-3oe7.pdb1-D-0-G-0.pdb
P00830	ATPB_YEAST	YJR121W	P38077	ATPG_YEAST	YBR039W	38	0	Structure	3oe7	1	F	0	100	91.8	40	508	-	G	0	95.7	88.7	34	309	-	P00830-P38077-EXP-3oe7.pdb1-F-0-G-0.pdb
P00830	ATPB_YEAST	YJR121W	P38077	ATPG_YEAST	YBR039W	39	0	Structure	3oe7	1	E	0	100	91.6	41	508	-	G	0	95.7	88.7	34	309	-	P00830-P38077-EXP-3oe7.pdb1-E-0-G-0.pdb
P00830	ATPB_YEAST	YJR121W	P38077	ATPG_YEAST	YBR039W	40	0	Structure	3oe7	2	N	0	100	92	39	508	-	P	0	88	88.7	34	309	-	P00830-P38077-EXP-3oe7.pdb2-N-0-P-0.pdb
P00830	ATPB_YEAST	YJR121W	P38077	ATPG_YEAST	YBR039W	41	0	Structure	3oe7	2	M	0	100	92	39	508	-	P	0	88	88.7	34	309	-	P00830-P38077-EXP-3oe7.pdb2-M-0-P-0.pdb
P00830	ATPB_YEAST	YJR121W	P38077	ATPG_YEAST	YBR039W	42	0	Structure	3oe7	2	O	0	100	91.6	40	507	-	P	0	88	88.7	34	309	-	P00830-P38077-EXP-3oe7.pdb2-O-0-P-0.pdb
P00830	ATPB_YEAST	YJR121W	P38077	ATPG_YEAST	YBR039W	43	0	Structure	3ofn	1	D	0	100	92	39	508	-	G	0	97.1	88.7	34	309	-	P00830-P38077-EXP-3ofn.pdb1-D-0-G-0.pdb
P00830	ATPB_YEAST	YJR121W	P38077	ATPG_YEAST	YBR039W	44	0	Structure	3ofn	1	F	0	100	91.8	40	508	-	G	0	97.1	88.7	34	309	-	P00830-P38077-EXP-3ofn.pdb1-F-0-G-0.pdb
P00830	ATPB_YEAST	YJR121W	P38077	ATPG_YEAST	YBR039W	45	0	Structure	3ofn	2	O	0	100	91.8	40	508	-	P	0	97.1	88.7	34	309	-	P00830-P38077-EXP-3ofn.pdb2-O-0-P-0.pdb
P00830	ATPB_YEAST	YJR121W	P38077	ATPG_YEAST	YBR039W	46	0	Structure	3ofn	1	E	0	100	91.8	40	508	-	G	0	97.1	88.7	34	309	-	P00830-P38077-EXP-3ofn.pdb1-E-0-G-0.pdb
P00830	ATPB_YEAST	YJR121W	P38077	ATPG_YEAST	YBR039W	47	0	Structure	3ofn	2	N	0	98.9	91.6	41	508	-	P	0	97.1	88.7	34	309	-	P00830-P38077-EXP-3ofn.pdb2-N-0-P-0.pdb
P00830	ATPB_YEAST	YJR121W	P38077	ATPG_YEAST	YBR039W	48	0	Structure	3ofn	2	M	0	100	90	40	499	-	P	0	97.1	88.7	34	309	-	P00830-P38077-EXP-3ofn.pdb2-M-0-P-0.pdb
P00830	ATPB_YEAST	YJR121W	P38077	ATPG_YEAST	YBR039W	49	0	Structure	3oe7	3	V	0	100	92	39	508	-	Y	0	71.6	88.4	34	308	-	P00830-P38077-EXP-3oe7.pdb3-V-0-Y-0.pdb
P00830	ATPB_YEAST	YJR121W	P38077	ATPG_YEAST	YBR039W	50	0	Structure	3oe7	3	X	0	100	91.8	40	508	-	Y	0	71.6	88.4	34	308	-	P00830-P38077-EXP-3oe7.pdb3-X-0-Y-0.pdb
P00830	ATPB_YEAST	YJR121W	P38077	ATPG_YEAST	YBR039W	51	0	Structure	3oe7	3	W	0	100	91.4	41	507	-	Y	0	71.6	88.4	34	308	-	P00830-P38077-EXP-3oe7.pdb3-W-0-Y-0.pdb
P00830	ATPB_YEAST	YJR121W	P38077	ATPG_YEAST	YBR039W	52	0	Structure	3ofn	3	X	0	100	91.8	40	508	-	Y	0	84	26	229	309	-	P00830-P38077-EXP-3ofn.pdb3-X-0-Y-0.pdb
P00830	ATPB_YEAST	YJR121W	P38077	ATPG_YEAST	YBR039W	53	0	Structure	3ofn	3	W	0	100	91.6	41	508	-	Y	0	84	26	229	309	-	P00830-P38077-EXP-3ofn.pdb3-W-0-Y-0.pdb
P00830	ATPB_YEAST	YJR121W	P38077	ATPG_YEAST	YBR039W	54	0	Structure	3ofn	3	V	0	96	73.4	40	414	-	Y	0	84	26	229	309	-	P00830-P38077-EXP-3ofn.pdb3-V-0-Y-0.pdb
P00830	ATPB_YEAST	YJR121W	P38077	ATPG_YEAST	YBR039W	55	0	Structure	2wpd	1	E	0	100	92.6	39	511	-	G	0	96.8	89.4	34	311	-	P00830-P38077-EXP-2wpd.pdb1-E-0-G-0.pdb
P00830	ATPB_YEAST	YJR121W	P38077	ATPG_YEAST	YBR039W	56	0	Structure	2wpd	1	F	0	100	92.4	40	511	-	G	0	96.8	89.4	34	311	-	P00830-P38077-EXP-2wpd.pdb1-F-0-G-0.pdb
P00830	ATPB_YEAST	YJR121W	P38077	ATPG_YEAST	YBR039W	57	0	Structure	2wpd	1	D	0	100	92	39	508	-	G	0	96.8	89.4	34	311	-	P00830-P38077-EXP-2wpd.pdb1-D-0-G-0.pdb
P00830	ATPB_YEAST	YJR121W	P38077	ATPG_YEAST	YBR039W	58	0	Structure	3fks	1	F	0	100	92.2	38	508	-	G	0	97.1	88.7	34	309	-	P00830-P38077-EXP-3fks.pdb1-F-0-G-0.pdb
P00830	ATPB_YEAST	YJR121W	P38077	ATPG_YEAST	YBR039W	59	0	Structure	3fks	1	E	0	100	91.6	41	508	-	G	0	97.1	88.7	34	309	-	P00830-P38077-EXP-3fks.pdb1-E-0-G-0.pdb
P00830	ATPB_YEAST	YJR121W	P38077	ATPG_YEAST	YBR039W	60	0	Structure	3fks	1	D	0	99.4	91.8	39	507	-	G	0	97.1	88.7	34	309	-	P00830-P38077-EXP-3fks.pdb1-D-0-G-0.pdb
P00830	ATPB_YEAST	YJR121W	P38077	ATPG_YEAST	YBR039W	61	0	Structure	3fks	2	O	0	100	91.8	40	508	-	P	0	85.1	88.7	34	309	-	P00830-P38077-EXP-3fks.pdb2-O-0-P-0.pdb
P00830	ATPB_YEAST	YJR121W	P38077	ATPG_YEAST	YBR039W	62	0	Structure	3fks	2	M	0	100	91.8	40	508	-	P	0	85.1	88.7	34	309	-	P00830-P38077-EXP-3fks.pdb2-M-0-P-0.pdb
P00830	ATPB_YEAST	YJR121W	P38077	ATPG_YEAST	YBR039W	63	0	Structure	3fks	2	N	0	99.8	91.4	41	507	-	P	0	85.1	88.7	34	309	-	P00830-P38077-EXP-3fks.pdb2-N-0-P-0.pdb
P00830	ATPB_YEAST	YJR121W	P38077	ATPG_YEAST	YBR039W	64	0	Structure	3fks	3	X	0	100	91.8	40	508	-	Y	0	67.8	88.7	34	309	-	P00830-P38077-EXP-3fks.pdb3-X-0-Y-0.pdb
P00830	ATPB_YEAST	YJR121W	P38077	ATPG_YEAST	YBR039W	65	0	Structure	3fks	3	W	0	100	91.2	41	506	-	Y	0	67.8	88.7	34	309	-	P00830-P38077-EXP-3fks.pdb3-W-0-Y-0.pdb
P00830	ATPB_YEAST	YJR121W	P38077	ATPG_YEAST	YBR039W	66	0	Structure	3fks	3	V	0	97.2	91.6	40	507	-	Y	0	67.8	88.7	34	309	-	P00830-P38077-EXP-3fks.pdb3-V-0-Y-0.pdb
P00830	ATPB_YEAST	YJR121W	P38077	ATPG_YEAST	YBR039W	67	0	Structure	3zry	1	D	0	100	92.2	39	509	-	G	0	96	89.1	34	310	-	P00830-P38077-EXP-3zry.pdb1-D-0-G-0.pdb
P00830	ATPB_YEAST	YJR121W	P38077	ATPG_YEAST	YBR039W	68	0	Structure	3zry	1	F	0	100	92	40	509	-	G	0	96	89.1	34	310	-	P00830-P38077-EXP-3zry.pdb1-F-0-G-0.pdb
P00830	ATPB_YEAST	YJR121W	P38077	ATPG_YEAST	YBR039W	69	0	Structure	3zry	1	E	0	100	91.8	41	509	-	G	0	96	89.1	34	310	-	P00830-P38077-EXP-3zry.pdb1-E-0-G-0.pdb
P00830	ATPB_YEAST	YJR121W	P38077	ATPG_YEAST	YBR039W	70	0	Structure	4b2q	1	e	0	100	92.6	39	511	-	g	0	96.8	89.4	34	311	-	P00830-P38077-EXP-4b2q.pdb1-e-0-g-0.pdb
P00830	ATPB_YEAST	YJR121W	P38077	ATPG_YEAST	YBR039W	71	0	Structure	4b2q	1	E	0	100	92.6	39	511	-	G	0	96.8	89.4	34	311	-	P00830-P38077-EXP-4b2q.pdb1-E-0-G-0.pdb
P00830	ATPB_YEAST	YJR121W	P38077	ATPG_YEAST	YBR039W	72	0	Structure	4b2q	1	f	0	100	92.4	40	511	-	g	0	96.8	89.4	34	311	-	P00830-P38077-EXP-4b2q.pdb1-f-0-g-0.pdb
P00830	ATPB_YEAST	YJR121W	P38077	ATPG_YEAST	YBR039W	73	0	Structure	4b2q	1	F	0	100	92.4	40	511	-	G	0	96.8	89.4	34	311	-	P00830-P38077-EXP-4b2q.pdb1-F-0-G-0.pdb
P00830	ATPB_YEAST	YJR121W	P38077	ATPG_YEAST	YBR039W	74	0	Structure	4b2q	1	D	0	100	92	39	508	-	G	0	96.8	89.4	34	311	-	P00830-P38077-EXP-4b2q.pdb1-D-0-G-0.pdb
P00830	ATPB_YEAST	YJR121W	P38077	ATPG_YEAST	YBR039W	75	0	Structure	4b2q	1	d	0	100	92	39	508	-	g	0	96.8	89.4	34	311	-	P00830-P38077-EXP-4b2q.pdb1-d-0-g-0.pdb
P07251	ATPA_YEAST	YBL099W	P07251	ATPA_YEAST	YBL099W	1	0	Dom_dom_model	2jdi	-	A	-	65.3	17.2	421	516	ATP-synt_ab_C	D	-	13.3	17.2	421	516	ATP-synt_ab_C	P07251-P07251-MDD-ATP-synt_ab_C-ATP-synt_ab_C-2jdi-A-384-488-D-368-475.pdb
P07251	ATPA_YEAST	YBL099W	P07251	ATPA_YEAST	YBL099W	2	0	Dom_dom_model	3fks	-	B	-	94.7	39.1	185	409	ATP-synt_ab	F	-	23.1	39.1	185	409	ATP-synt_ab	P07251-P07251-MDD-ATP-synt_ab-ATP-synt_ab-3fks-B-150-374-F-136-355.pdb
P07251	ATPA_YEAST	YBL099W	P07251	ATPA_YEAST	YBL099W	3	0	Dom_dom_model	3w3a	-	L	-	24.2	39.1	185	409	ATP-synt_ab	I	-	10.6	12.1	422	487	ATP-synt_ab_C	P07251-P07251-MDD-ATP-synt_ab-ATP-synt_ab_C-3w3a-L-133-359-I-448-576.pdb
P00830	ATPB_YEAST	YJR121W	P00830	ATPB_YEAST	YJR121W	1	0	Dom_dom_model	2jj2	-	H	-	14	19.8	401	504	ATP-synt_ab_C	K	-	69.5	19.8	401	504	ATP-synt_ab_C	P00830-P00830-MDD-ATP-synt_ab_C-ATP-synt_ab_C-2jj2-H-384-488-K-368-475.pdb
P00830	ATPB_YEAST	YJR121W	P00830	ATPB_YEAST	YJR121W	2	0	Dom_dom_model	3oaa	-	J	-	21.9	12.3	51	113	ATP-synt_ab_N	M	-	49.3	13.1	46	112	ATP-synt_ab_N	P00830-P00830-MDD-ATP-synt_ab_N-ATP-synt_ab_N-3oaa-J-27-92-M-5-72.pdb
P42949	TIM16_YEAST	YJL104W	Q07914	TIM14_YEAST	YLR008C	1	0	Structure	2guz	5	J	0	98.5	43.6	53	117	-	I	0	100	41.7	99	168	-	P42949-Q07914-EXP-2guz.pdb5-J-0-I-0.pdb
P42949	TIM16_YEAST	YJL104W	Q07914	TIM14_YEAST	YLR008C	2	0	Structure	2guz	6	L	0	98.5	43.6	53	117	-	K	0	100	41.7	99	168	-	P42949-Q07914-EXP-2guz.pdb6-L-0-K-0.pdb
P42949	TIM16_YEAST	YJL104W	Q07914	TIM14_YEAST	YLR008C	3	0	Structure	2guz	4	H	0	98.5	43.6	53	117	-	G	0	100	41.7	99	168	-	P42949-Q07914-EXP-2guz.pdb4-H-0-G-0.pdb
P42949	TIM16_YEAST	YJL104W	Q07914	TIM14_YEAST	YLR008C	4	0	Structure	2guz	7	N	0	98.5	43.6	53	117	-	M	0	100	41.7	99	168	-	P42949-Q07914-EXP-2guz.pdb7-N-0-M-0.pdb
P42949	TIM16_YEAST	YJL104W	Q07914	TIM14_YEAST	YLR008C	5	0	Structure	2guz	2	D	0	98.5	43.6	53	117	-	C	0	100	41.7	99	168	-	P42949-Q07914-EXP-2guz.pdb2-D-0-C-0.pdb
P42949	TIM16_YEAST	YJL104W	Q07914	TIM14_YEAST	YLR008C	6	0	Structure	2guz	8	P	0	98.5	43.6	53	117	-	O	0	100	41.7	99	168	-	P42949-Q07914-EXP-2guz.pdb8-P-0-O-0.pdb
P42949	TIM16_YEAST	YJL104W	Q07914	TIM14_YEAST	YLR008C	7	0	Structure	2guz	1	B	0	98.5	43.6	53	117	-	A	0	100	41.7	99	168	-	P42949-Q07914-EXP-2guz.pdb1-B-0-A-0.pdb
P42949	TIM16_YEAST	YJL104W	Q07914	TIM14_YEAST	YLR008C	8	0	Structure	2guz	3	F	0	98.5	43.6	53	117	-	E	0	100	41.7	99	168	-	P42949-Q07914-EXP-2guz.pdb3-F-0-E-0.pdb
P00175	CYB2_YEAST	YML054C	P00175	CYB2_YEAST	YML054C	1	0	Structure	1kbi	1	A	0	98.6	86.5	81	591	-	A	1	98.6	86.5	81	591	-	P00175-P00175-EXP-1kbi.pdb1-A-0-A-1.pdb
P00175	CYB2_YEAST	YML054C	P00175	CYB2_YEAST	YML054C	2	0	Structure	1kbi	1	B	0	98.1	69.9	179	591	-	A	0	98.6	86.5	81	591	-	P00175-P00175-EXP-1kbi.pdb1-B-0-A-0.pdb
P00175	CYB2_YEAST	YML054C	P00175	CYB2_YEAST	YML054C	3	0	Structure	1kbi	1	B	0	98.1	69.9	179	591	-	A	1	98.6	86.5	81	591	-	P00175-P00175-EXP-1kbi.pdb1-B-0-A-1.pdb
P00175	CYB2_YEAST	YML054C	P00175	CYB2_YEAST	YML054C	4	0	Structure	1kbi	1	B	1	98.1	69.9	179	591	-	A	1	98.6	86.5	81	591	-	P00175-P00175-EXP-1kbi.pdb1-B-1-A-1.pdb
P00175	CYB2_YEAST	YML054C	P00175	CYB2_YEAST	YML054C	5	0	Structure	1kbi	1	B	1	98.1	69.9	179	591	-	A	0	98.6	86.5	81	591	-	P00175-P00175-EXP-1kbi.pdb1-B-1-A-0.pdb
P00175	CYB2_YEAST	YML054C	P00175	CYB2_YEAST	YML054C	6	0	Structure	1kbi	1	B	0	98.1	69.9	179	591	-	B	1	98.1	69.9	179	591	-	P00175-P00175-EXP-1kbi.pdb1-B-0-B-1.pdb
P00175	CYB2_YEAST	YML054C	P00175	CYB2_YEAST	YML054C	7	0	Structure	1fcb	1	A	0	96.7	86.5	81	591	-	A	1	96.7	86.5	81	591	-	P00175-P00175-EXP-1fcb.pdb1-A-0-A-1.pdb
P00175	CYB2_YEAST	YML054C	P00175	CYB2_YEAST	YML054C	8	0	Structure	1fcb	1	B	1	97.1	69.7	180	591	-	A	0	96.7	86.5	81	591	-	P00175-P00175-EXP-1fcb.pdb1-B-1-A-0.pdb
P00175	CYB2_YEAST	YML054C	P00175	CYB2_YEAST	YML054C	9	0	Structure	1fcb	1	B	1	97.1	69.7	180	591	-	A	1	96.7	86.5	81	591	-	P00175-P00175-EXP-1fcb.pdb1-B-1-A-1.pdb
P00175	CYB2_YEAST	YML054C	P00175	CYB2_YEAST	YML054C	10	0	Structure	1fcb	1	B	0	97.1	69.7	180	591	-	A	1	96.7	86.5	81	591	-	P00175-P00175-EXP-1fcb.pdb1-B-0-A-1.pdb
P00175	CYB2_YEAST	YML054C	P00175	CYB2_YEAST	YML054C	11	0	Structure	1fcb	1	B	0	97.1	69.7	180	591	-	A	0	96.7	86.5	81	591	-	P00175-P00175-EXP-1fcb.pdb1-B-0-A-0.pdb
P00175	CYB2_YEAST	YML054C	P00175	CYB2_YEAST	YML054C	12	0	Structure	1fcb	1	B	0	97.1	69.7	180	591	-	B	1	97.1	69.7	180	591	-	P00175-P00175-EXP-1fcb.pdb1-B-0-B-1.pdb
P00175	CYB2_YEAST	YML054C	P00175	CYB2_YEAST	YML054C	13	0	Structure	1kbj	1	A	0	95.4	69.7	180	591	-	A	1	95.4	69.7	180	591	-	P00175-P00175-EXP-1kbj.pdb1-A-0-A-1.pdb
P00175	CYB2_YEAST	YML054C	P00175	CYB2_YEAST	YML054C	14	0	Structure	1kbj	1	B	0	95.1	69.7	180	591	-	A	1	95.4	69.7	180	591	-	P00175-P00175-EXP-1kbj.pdb1-B-0-A-1.pdb
P00175	CYB2_YEAST	YML054C	P00175	CYB2_YEAST	YML054C	15	0	Structure	1kbj	1	B	1	95.1	69.7	180	591	-	A	1	95.4	69.7	180	591	-	P00175-P00175-EXP-1kbj.pdb1-B-1-A-1.pdb
P00175	CYB2_YEAST	YML054C	P00175	CYB2_YEAST	YML054C	16	0	Structure	1kbj	1	B	1	95.1	69.7	180	591	-	A	0	95.4	69.7	180	591	-	P00175-P00175-EXP-1kbj.pdb1-B-1-A-0.pdb
P00175	CYB2_YEAST	YML054C	P00175	CYB2_YEAST	YML054C	17	0	Structure	1kbj	1	B	0	95.1	69.7	180	591	-	A	0	95.4	69.7	180	591	-	P00175-P00175-EXP-1kbj.pdb1-B-0-A-0.pdb
P00175	CYB2_YEAST	YML054C	P00175	CYB2_YEAST	YML054C	18	0	Structure	1kbj	1	B	0	95.1	69.7	180	591	-	B	1	95.1	69.7	180	591	-	P00175-P00175-EXP-1kbj.pdb1-B-0-B-1.pdb
P00175	CYB2_YEAST	YML054C	P00175	CYB2_YEAST	YML054C	19	0	Structure	1ltd	1	A	0	96	84.9	90	591	-	A	1	96	84.9	90	591	-	P00175-P00175-EXP-1ltd.pdb1-A-0-A-1.pdb
P00175	CYB2_YEAST	YML054C	P00175	CYB2_YEAST	YML054C	20	0	Structure	1ltd	1	B	0	94.4	69.4	182	591	-	A	0	96	84.9	90	591	-	P00175-P00175-EXP-1ltd.pdb1-B-0-A-0.pdb
P00175	CYB2_YEAST	YML054C	P00175	CYB2_YEAST	YML054C	21	0	Structure	1ltd	1	B	0	94.4	69.4	182	591	-	A	1	96	84.9	90	591	-	P00175-P00175-EXP-1ltd.pdb1-B-0-A-1.pdb
P00175	CYB2_YEAST	YML054C	P00175	CYB2_YEAST	YML054C	22	0	Structure	1ltd	1	B	1	94.4	69.4	182	591	-	A	1	96	84.9	90	591	-	P00175-P00175-EXP-1ltd.pdb1-B-1-A-1.pdb
P00175	CYB2_YEAST	YML054C	P00175	CYB2_YEAST	YML054C	23	0	Structure	1ltd	1	B	1	94.4	69.4	182	591	-	A	0	96	84.9	90	591	-	P00175-P00175-EXP-1ltd.pdb1-B-1-A-0.pdb
P00175	CYB2_YEAST	YML054C	P00175	CYB2_YEAST	YML054C	24	0	Structure	1ltd	1	B	0	94.4	69.4	182	591	-	B	1	94.4	69.4	182	591	-	P00175-P00175-EXP-1ltd.pdb1-B-0-B-1.pdb
P00175	CYB2_YEAST	YML054C	P00175	CYB2_YEAST	YML054C	25	0	Structure	1szf	1	A	0	95.4	69.7	180	591	-	A	1	95.4	69.7	180	591	-	P00175-P00175-EXP-1szf.pdb1-A-0-A-1.pdb
P00175	CYB2_YEAST	YML054C	P00175	CYB2_YEAST	YML054C	26	0	Structure	1szg	1	A	0	94.7	69.7	180	591	-	A	1	94.7	69.7	180	591	-	P00175-P00175-EXP-1szg.pdb1-A-0-A-1.pdb
P00175	CYB2_YEAST	YML054C	P00175	CYB2_YEAST	YML054C	27	0	Structure	1szf	1	B	1	93.9	69.7	180	591	-	A	0	95.4	69.7	180	591	-	P00175-P00175-EXP-1szf.pdb1-B-1-A-0.pdb
P00175	CYB2_YEAST	YML054C	P00175	CYB2_YEAST	YML054C	28	0	Structure	1szf	1	B	1	93.9	69.7	180	591	-	A	1	95.4	69.7	180	591	-	P00175-P00175-EXP-1szf.pdb1-B-1-A-1.pdb
P00175	CYB2_YEAST	YML054C	P00175	CYB2_YEAST	YML054C	29	0	Structure	1szf	1	B	0	93.9	69.7	180	591	-	A	0	95.4	69.7	180	591	-	P00175-P00175-EXP-1szf.pdb1-B-0-A-0.pdb
P00175	CYB2_YEAST	YML054C	P00175	CYB2_YEAST	YML054C	30	0	Structure	1szf	1	B	0	93.9	69.7	180	591	-	A	1	95.4	69.7	180	591	-	P00175-P00175-EXP-1szf.pdb1-B-0-A-1.pdb
P00175	CYB2_YEAST	YML054C	P00175	CYB2_YEAST	YML054C	31	0	Structure	1szg	1	B	0	93.9	69.4	182	591	-	A	0	94.7	69.7	180	591	-	P00175-P00175-EXP-1szg.pdb1-B-0-A-0.pdb
P00175	CYB2_YEAST	YML054C	P00175	CYB2_YEAST	YML054C	32	0	Structure	1szg	1	B	1	93.9	69.4	182	591	-	A	0	94.7	69.7	180	591	-	P00175-P00175-EXP-1szg.pdb1-B-1-A-0.pdb
P00175	CYB2_YEAST	YML054C	P00175	CYB2_YEAST	YML054C	33	0	Structure	1szg	1	B	0	93.9	69.4	182	591	-	A	1	94.7	69.7	180	591	-	P00175-P00175-EXP-1szg.pdb1-B-0-A-1.pdb
P00175	CYB2_YEAST	YML054C	P00175	CYB2_YEAST	YML054C	34	0	Structure	1szg	1	B	1	93.9	69.4	182	591	-	A	1	94.7	69.7	180	591	-	P00175-P00175-EXP-1szg.pdb1-B-1-A-1.pdb
P00175	CYB2_YEAST	YML054C	P00175	CYB2_YEAST	YML054C	35	0	Structure	1szf	1	B	0	93.9	69.7	180	591	-	B	1	93.9	69.7	180	591	-	P00175-P00175-EXP-1szf.pdb1-B-0-B-1.pdb
P00175	CYB2_YEAST	YML054C	P00175	CYB2_YEAST	YML054C	36	0	Structure	1szg	1	B	0	93.9	69.4	182	591	-	B	1	93.9	69.4	182	591	-	P00175-P00175-EXP-1szg.pdb1-B-0-B-1.pdb
P00175	CYB2_YEAST	YML054C	P00175	CYB2_YEAST	YML054C	37	0	Structure	1qcw	1	B	1	93.7	69.4	182	591	-	A	1	93.7	69.4	182	591	-	P00175-P00175-EXP-1qcw.pdb1-B-1-A-1.pdb
P00175	CYB2_YEAST	YML054C	P00175	CYB2_YEAST	YML054C	38	0	Structure	1qcw	1	B	1	93.7	69.4	182	591	-	A	0	93.7	69.4	182	591	-	P00175-P00175-EXP-1qcw.pdb1-B-1-A-0.pdb
P00175	CYB2_YEAST	YML054C	P00175	CYB2_YEAST	YML054C	39	0	Structure	1qcw	1	B	0	93.7	69.4	182	591	-	A	0	93.7	69.4	182	591	-	P00175-P00175-EXP-1qcw.pdb1-B-0-A-0.pdb
P00175	CYB2_YEAST	YML054C	P00175	CYB2_YEAST	YML054C	40	0	Structure	1qcw	1	A	0	93.7	69.4	182	591	-	A	1	93.7	69.4	182	591	-	P00175-P00175-EXP-1qcw.pdb1-A-0-A-1.pdb
P00175	CYB2_YEAST	YML054C	P00175	CYB2_YEAST	YML054C	41	0	Structure	1qcw	1	B	0	93.7	69.4	182	591	-	A	1	93.7	69.4	182	591	-	P00175-P00175-EXP-1qcw.pdb1-B-0-A-1.pdb
P00175	CYB2_YEAST	YML054C	P00175	CYB2_YEAST	YML054C	42	0	Structure	1qcw	1	B	0	93.7	69.4	182	591	-	B	1	93.7	69.4	182	591	-	P00175-P00175-EXP-1qcw.pdb1-B-0-B-1.pdb
P00175	CYB2_YEAST	YML054C	P00175	CYB2_YEAST	YML054C	43	0	Structure	2oz0	2	A	0	96.5	86.1	82	590	-	A	1	96.5	86.1	82	590	-	P00175-P00175-EXP-2oz0.pdb2-A-0-A-1.pdb
P00175	CYB2_YEAST	YML054C	P00175	CYB2_YEAST	YML054C	44	0	Structure	2oz0	2	B	0	95.6	69.9	178	590	-	A	1	96.5	86.1	82	590	-	P00175-P00175-EXP-2oz0.pdb2-B-0-A-1.pdb
P00175	CYB2_YEAST	YML054C	P00175	CYB2_YEAST	YML054C	45	0	Structure	2oz0	2	B	0	95.6	69.9	178	590	-	A	0	96.5	86.1	82	590	-	P00175-P00175-EXP-2oz0.pdb2-B-0-A-0.pdb
P00175	CYB2_YEAST	YML054C	P00175	CYB2_YEAST	YML054C	46	0	Structure	2oz0	1	B	0	95.6	69.9	178	590	-	A	0	96.5	86.1	82	590	-	P00175-P00175-EXP-2oz0.pdb1-B-0-A-0.pdb
P00175	CYB2_YEAST	YML054C	P00175	CYB2_YEAST	YML054C	47	0	Structure	2oz0	2	B	1	95.6	69.9	178	590	-	A	0	96.5	86.1	82	590	-	P00175-P00175-EXP-2oz0.pdb2-B-1-A-0.pdb
P00175	CYB2_YEAST	YML054C	P00175	CYB2_YEAST	YML054C	48	0	Structure	2oz0	2	B	1	95.6	69.9	178	590	-	A	1	96.5	86.1	82	590	-	P00175-P00175-EXP-2oz0.pdb2-B-1-A-1.pdb
P00175	CYB2_YEAST	YML054C	P00175	CYB2_YEAST	YML054C	49	0	Structure	2oz0	2	B	0	95.6	69.9	178	590	-	B	1	95.6	69.9	178	590	-	P00175-P00175-EXP-2oz0.pdb2-B-0-B-1.pdb
P00175	CYB2_YEAST	YML054C	P00175	CYB2_YEAST	YML054C	50	0	Structure	1lco	1	A	0	95.4	84.9	90	591	-	A	1	95.4	84.9	90	591	-	P00175-P00175-EXP-1lco.pdb1-A-0-A-1.pdb
P00175	CYB2_YEAST	YML054C	P00175	CYB2_YEAST	YML054C	51	0	Structure	1ldc	1	A	0	95	84.9	90	591	-	A	1	95	84.9	90	591	-	P00175-P00175-EXP-1ldc.pdb1-A-0-A-1.pdb
P00175	CYB2_YEAST	YML054C	P00175	CYB2_YEAST	YML054C	52	0	Structure	1lco	1	B	0	95.1	69.4	182	591	-	A	1	95.4	84.9	90	591	-	P00175-P00175-EXP-1lco.pdb1-B-0-A-1.pdb
P00175	CYB2_YEAST	YML054C	P00175	CYB2_YEAST	YML054C	53	0	Structure	1lco	1	B	1	95.1	69.4	182	591	-	A	0	95.4	84.9	90	591	-	P00175-P00175-EXP-1lco.pdb1-B-1-A-0.pdb
P00175	CYB2_YEAST	YML054C	P00175	CYB2_YEAST	YML054C	54	0	Structure	1lco	1	B	0	95.1	69.4	182	591	-	A	0	95.4	84.9	90	591	-	P00175-P00175-EXP-1lco.pdb1-B-0-A-0.pdb
P00175	CYB2_YEAST	YML054C	P00175	CYB2_YEAST	YML054C	55	0	Structure	1lco	1	B	1	95.1	69.4	182	591	-	A	1	95.4	84.9	90	591	-	P00175-P00175-EXP-1lco.pdb1-B-1-A-1.pdb
P00175	CYB2_YEAST	YML054C	P00175	CYB2_YEAST	YML054C	56	0	Structure	1ldc	1	B	0	92.9	69.4	182	591	-	A	1	95	84.9	90	591	-	P00175-P00175-EXP-1ldc.pdb1-B-0-A-1.pdb
P00175	CYB2_YEAST	YML054C	P00175	CYB2_YEAST	YML054C	57	0	Structure	1ldc	1	B	1	92.9	69.4	182	591	-	A	0	95	84.9	90	591	-	P00175-P00175-EXP-1ldc.pdb1-B-1-A-0.pdb
P00175	CYB2_YEAST	YML054C	P00175	CYB2_YEAST	YML054C	58	0	Structure	1ldc	1	B	1	92.9	69.4	182	591	-	A	1	95	84.9	90	591	-	P00175-P00175-EXP-1ldc.pdb1-B-1-A-1.pdb
P00175	CYB2_YEAST	YML054C	P00175	CYB2_YEAST	YML054C	59	0	Structure	1ldc	1	B	0	92.9	69.4	182	591	-	A	0	95	84.9	90	591	-	P00175-P00175-EXP-1ldc.pdb1-B-0-A-0.pdb
P00175	CYB2_YEAST	YML054C	P00175	CYB2_YEAST	YML054C	60	0	Structure	1lco	1	B	0	95.1	69.4	182	591	-	B	1	95.1	69.4	182	591	-	P00175-P00175-EXP-1lco.pdb1-B-0-B-1.pdb
P00175	CYB2_YEAST	YML054C	P00175	CYB2_YEAST	YML054C	61	0	Structure	1ldc	1	B	0	92.9	69.4	182	591	-	B	1	92.9	69.4	182	591	-	P00175-P00175-EXP-1ldc.pdb1-B-0-B-1.pdb
P00175	CYB2_YEAST	YML054C	P00175	CYB2_YEAST	YML054C	62	0	Structure	1sze	1	A	0	94.9	69.7	180	591	-	A	1	94.9	69.7	180	591	-	P00175-P00175-EXP-1sze.pdb1-A-0-A-1.pdb
P00175	CYB2_YEAST	YML054C	P00175	CYB2_YEAST	YML054C	63	0	Structure	1sze	1	B	0	94.2	69.7	180	591	-	A	0	94.9	69.7	180	591	-	P00175-P00175-EXP-1sze.pdb1-B-0-A-0.pdb
P00175	CYB2_YEAST	YML054C	P00175	CYB2_YEAST	YML054C	64	0	Structure	1sze	1	B	1	94.2	69.7	180	591	-	A	0	94.9	69.7	180	591	-	P00175-P00175-EXP-1sze.pdb1-B-1-A-0.pdb
P00175	CYB2_YEAST	YML054C	P00175	CYB2_YEAST	YML054C	65	0	Structure	1sze	1	B	0	94.2	69.7	180	591	-	A	1	94.9	69.7	180	591	-	P00175-P00175-EXP-1sze.pdb1-B-0-A-1.pdb
P00175	CYB2_YEAST	YML054C	P00175	CYB2_YEAST	YML054C	66	0	Structure	1sze	1	B	1	94.2	69.7	180	591	-	A	1	94.9	69.7	180	591	-	P00175-P00175-EXP-1sze.pdb1-B-1-A-1.pdb
P00175	CYB2_YEAST	YML054C	P00175	CYB2_YEAST	YML054C	67	0	Structure	1sze	1	B	0	94.2	69.7	180	591	-	B	1	94.2	69.7	180	591	-	P00175-P00175-EXP-1sze.pdb1-B-0-B-1.pdb
Q01852	TIM44_YEAST	YIL022W	Q01852	TIM44_YEAST	YIL022W	1	0	Structure	3qk9	1	B	1	88.8	45.7	235	431	-	A	0	88.8	45.5	236	431	-	Q01852-Q01852-EXP-3qk9.pdb1-B-1-A-0.pdb
Q01852	TIM44_YEAST	YIL022W	Q01852	TIM44_YEAST	YIL022W	2	0	Structure	2fxt	1	A	0	100	44.5	234	425	-	A	1	100	44.5	234	425	-	Q01852-Q01852-EXP-2fxt.pdb1-A-0-A-1.pdb
P38720	6PGD1_YEAST	YHR183W	P38720	6PGD1_YEAST	YHR183W	1	0	Structure	2p4q	1	A	0	100	97.3	1	476	-	A	1	100	97.3	1	476	-	P38720-P38720-EXP-2p4q.pdb1-A-0-A-1.pdb
P14540	ALF_YEAST	YKL060C	P14540	ALF_YEAST	YKL060C	1	0	Model	1dos	1	B	0	49.1	97.5	10	359	-	A	0	49.1	97.5	10	359	-	P14540-P14540-MDL-1dos.pdb1-B-0-A-0.pdb
P14540	ALF_YEAST	YKL060C	P14540	ALF_YEAST	YKL060C	2	0	Model	3qm3	1	B	0	46.8	99.4	1	357	-	A	0	47.2	99.4	1	357	-	P14540-P14540-MDL-3qm3.pdb1-B-0-A-0.pdb
P14540	ALF_YEAST	YKL060C	P14540	ALF_YEAST	YKL060C	3	0	Model	3qm3	3	F	0	46.8	99.4	1	357	-	E	0	47.2	99.4	1	357	-	P14540-P14540-MDL-3qm3.pdb3-F-0-E-0.pdb
P40416	ATM1_YEAST	YMR301C	P40416	ATM1_YEAST	YMR301C	1	0	Model	3zdq	1	A	0	31.5	80.6	108	663	-	A	1	31.5	80.6	108	663	-	P40416-P40416-MDL-3zdq.pdb1-A-0-A-1.pdb
P40416	ATM1_YEAST	YMR301C	P40416	ATM1_YEAST	YMR301C	2	0	Model	4ayx	1	A	0	31.5	80.6	108	663	-	A	1	31.5	80.6	108	663	-	P40416-P40416-MDL-4ayx.pdb1-A-0-A-1.pdb
P40416	ATM1_YEAST	YMR301C	P40416	ATM1_YEAST	YMR301C	3	0	Model	2hyd	1	B	0	30.1	83.8	97	674	-	A	0	30.1	83.8	97	674	-	P40416-P40416-MDL-2hyd.pdb1-B-0-A-0.pdb
P00925	ENO2_YEAST	YHR174W	P00925	ENO2_YEAST	YHR174W	1	0	Model	1one	1	B	0	95.4	99.8	2	437	-	A	0	95.4	99.8	2	437	-	P00925-P00925-MDL-1one.pdb1-B-0-A-0.pdb
P00925	ENO2_YEAST	YHR174W	P00925	ENO2_YEAST	YHR174W	2	0	Model	1ebh	1	B	0	95.4	99.8	2	437	-	A	0	95.4	99.8	2	437	-	P00925-P00925-MDL-1ebh.pdb1-B-0-A-0.pdb
P00925	ENO2_YEAST	YHR174W	P00925	ENO2_YEAST	YHR174W	3	0	Model	2one	1	B	0	95.4	99.8	2	437	-	A	0	95.4	99.8	2	437	-	P00925-P00925-MDL-2one.pdb1-B-0-A-0.pdb
P00359	G3P3_YEAST	YGR192C	P00359	G3P3_YEAST	YGR192C	1	0	Structure	3pym	1	A	0	100	100	1	332	-	A	1	100	100	1	332	-	P00359-P00359-EXP-3pym.pdb1-A-0-A-1.pdb
P00359	G3P3_YEAST	YGR192C	P00359	G3P3_YEAST	YGR192C	2	0	Structure	3pym	1	B	0	100	99.7	2	332	-	A	0	100	100	1	332	-	P00359-P00359-EXP-3pym.pdb1-B-0-A-0.pdb
P00359	G3P3_YEAST	YGR192C	P00359	G3P3_YEAST	YGR192C	3	0	Structure	3pym	1	B	1	100	99.7	2	332	-	A	0	100	100	1	332	-	P00359-P00359-EXP-3pym.pdb1-B-1-A-0.pdb
P00359	G3P3_YEAST	YGR192C	P00359	G3P3_YEAST	YGR192C	4	0	Structure	3pym	1	B	0	100	99.7	2	332	-	A	1	100	100	1	332	-	P00359-P00359-EXP-3pym.pdb1-B-0-A-1.pdb
P00359	G3P3_YEAST	YGR192C	P00359	G3P3_YEAST	YGR192C	5	0	Structure	3pym	1	B	1	100	99.7	2	332	-	A	1	100	100	1	332	-	P00359-P00359-EXP-3pym.pdb1-B-1-A-1.pdb
P00359	G3P3_YEAST	YGR192C	P00359	G3P3_YEAST	YGR192C	6	0	Structure	3pym	1	B	0	100	99.7	2	332	-	B	1	100	99.7	2	332	-	P00359-P00359-EXP-3pym.pdb1-B-0-B-1.pdb
P00359	G3P3_YEAST	YGR192C	P00359	G3P3_YEAST	YGR192C	7	0	Structure	4iq8	4	A	0	100	99.7	2	332	-	A	1	100	99.7	2	332	-	P00359-P00359-EXP-4iq8.pdb4-A-0-A-1.pdb
P00359	G3P3_YEAST	YGR192C	P00359	G3P3_YEAST	YGR192C	8	0	Structure	4iq8	2	A	0	100	99.7	2	332	-	A	1	100	99.7	2	332	-	P00359-P00359-EXP-4iq8.pdb2-A-0-A-1.pdb
P00359	G3P3_YEAST	YGR192C	P00359	G3P3_YEAST	YGR192C	9	0	Structure	4iq8	4	A	2	100	99.7	2	332	-	A	3	100	99.7	2	332	-	P00359-P00359-EXP-4iq8.pdb4-A-2-A-3.pdb
P00359	G3P3_YEAST	YGR192C	P00359	G3P3_YEAST	YGR192C	10	0	Structure	4iq8	4	A	1	100	99.7	2	332	-	A	3	100	99.7	2	332	-	P00359-P00359-EXP-4iq8.pdb4-A-1-A-3.pdb
P00359	G3P3_YEAST	YGR192C	P00359	G3P3_YEAST	YGR192C	11	0	Structure	4iq8	3	A	0	100	99.7	2	332	-	A	1	100	99.7	2	332	-	P00359-P00359-EXP-4iq8.pdb3-A-0-A-1.pdb
P00359	G3P3_YEAST	YGR192C	P00359	G3P3_YEAST	YGR192C	12	0	Structure	4iq8	4	A	1	100	99.7	2	332	-	A	2	100	99.7	2	332	-	P00359-P00359-EXP-4iq8.pdb4-A-1-A-2.pdb
P00359	G3P3_YEAST	YGR192C	P00359	G3P3_YEAST	YGR192C	13	0	Structure	4iq8	4	A	0	100	99.7	2	332	-	A	2	100	99.7	2	332	-	P00359-P00359-EXP-4iq8.pdb4-A-0-A-2.pdb
P00359	G3P3_YEAST	YGR192C	P00359	G3P3_YEAST	YGR192C	14	0	Structure	4iq8	4	A	0	100	99.7	2	332	-	A	3	100	99.7	2	332	-	P00359-P00359-EXP-4iq8.pdb4-A-0-A-3.pdb
P04806	HXKA_YEAST	YFR053C	P04806	HXKA_YEAST	YFR053C	1	0	Model	3o4w	1	B	0	71.1	99.6	2	484	-	A	0	71.1	99.6	2	484	-	P04806-P04806-MDL-3o4w.pdb1-B-0-A-0.pdb
P04806	HXKA_YEAST	YFR053C	P04806	HXKA_YEAST	YFR053C	2	0	Model	3o1w	1	B	0	71.1	99.6	2	484	-	A	0	71.1	99.6	2	484	-	P04806-P04806-MDL-3o1w.pdb1-B-0-A-0.pdb
P04806	HXKA_YEAST	YFR053C	P04806	HXKA_YEAST	YFR053C	3	0	Model	3o5b	1	B	0	70.9	98.4	8	484	-	A	0	71	98.6	7	484	-	P04806-P04806-MDL-3o5b.pdb1-B-0-A-0.pdb
P06169	PDC1_YEAST	YLR044C	P06169	PDC1_YEAST	YLR044C	1	0	Structure	2vk8	2	D	0	99.3	99.8	2	563	-	C	0	99.3	99.8	2	563	-	P06169-P06169-EXP-2vk8.pdb2-D-0-C-0.pdb
P06169	PDC1_YEAST	YLR044C	P06169	PDC1_YEAST	YLR044C	2	0	Structure	2vk8	1	B	0	99.3	99.8	2	563	-	A	0	99.3	99.8	2	563	-	P06169-P06169-EXP-2vk8.pdb1-B-0-A-0.pdb
P06169	PDC1_YEAST	YLR044C	P06169	PDC1_YEAST	YLR044C	3	0	Structure	2w93	2	D	0	99.3	99.8	2	563	-	C	0	99.3	98.9	2	558	-	P06169-P06169-EXP-2w93.pdb2-D-0-C-0.pdb
P06169	PDC1_YEAST	YLR044C	P06169	PDC1_YEAST	YLR044C	4	0	Structure	2w93	1	B	0	99.3	99.8	2	563	-	A	0	96.8	99.1	2	559	-	P06169-P06169-EXP-2w93.pdb1-B-0-A-0.pdb
P06169	PDC1_YEAST	YLR044C	P06169	PDC1_YEAST	YLR044C	5	0	Structure	2vk1	2	D	0	99.1	99.8	2	563	-	C	0	99.1	99.8	2	563	-	P06169-P06169-EXP-2vk1.pdb2-D-0-C-0.pdb
P06169	PDC1_YEAST	YLR044C	P06169	PDC1_YEAST	YLR044C	6	0	Structure	2vk1	1	B	0	99.1	99.8	2	563	-	A	0	99.1	99.8	2	563	-	P06169-P06169-EXP-2vk1.pdb1-B-0-A-0.pdb
P06169	PDC1_YEAST	YLR044C	P06169	PDC1_YEAST	YLR044C	7	0	Structure	1pvd	1	B	0	96.2	98.6	2	556	-	A	0	96.2	98.6	2	556	-	P06169-P06169-EXP-1pvd.pdb1-B-0-A-0.pdb
P06169	PDC1_YEAST	YLR044C	P06169	PDC1_YEAST	YLR044C	8	0	Structure	1qpb	1	B	1	99.3	98.6	2	556	-	A	0	99.3	98.6	2	556	-	P06169-P06169-EXP-1qpb.pdb1-B-1-A-0.pdb
P06169	PDC1_YEAST	YLR044C	P06169	PDC1_YEAST	YLR044C	9	0	Structure	1qpb	1	B	0	99.3	98.6	2	556	-	A	0	99.3	98.6	2	556	-	P06169-P06169-EXP-1qpb.pdb1-B-0-A-0.pdb
P06169	PDC1_YEAST	YLR044C	P06169	PDC1_YEAST	YLR044C	10	0	Structure	1qpb	1	B	0	99.3	98.6	2	556	-	B	1	99.3	98.6	2	556	-	P06169-P06169-EXP-1qpb.pdb1-B-0-B-1.pdb
P06169	PDC1_YEAST	YLR044C	P06169	PDC1_YEAST	YLR044C	11	0	Structure	1qpb	2	B	0	99.3	98.6	2	556	-	A	0	99.3	98.6	2	556	-	P06169-P06169-EXP-1qpb.pdb2-B-0-A-0.pdb
P06169	PDC1_YEAST	YLR044C	P06169	PDC1_YEAST	YLR044C	12	0	Structure	1qpb	1	B	1	99.3	98.6	2	556	-	A	1	99.3	98.6	2	556	-	P06169-P06169-EXP-1qpb.pdb1-B-1-A-1.pdb
P06169	PDC1_YEAST	YLR044C	P06169	PDC1_YEAST	YLR044C	13	0	Structure	1qpb	1	A	0	99.3	98.6	2	556	-	A	1	99.3	98.6	2	556	-	P06169-P06169-EXP-1qpb.pdb1-A-0-A-1.pdb
P06169	PDC1_YEAST	YLR044C	P06169	PDC1_YEAST	YLR044C	14	0	Structure	1qpb	1	B	0	99.3	98.6	2	556	-	A	1	99.3	98.6	2	556	-	P06169-P06169-EXP-1qpb.pdb1-B-0-A-1.pdb
P06169	PDC1_YEAST	YLR044C	P06169	PDC1_YEAST	YLR044C	15	0	Structure	1pyd	1	B	0	96.2	98.6	2	556	-	A	0	96.2	98.6	2	556	-	P06169-P06169-EXP-1pyd.pdb1-B-0-A-0.pdb
P00560	PGK_YEAST	YCR012W	P00560	PGK_YEAST	YCR012W	1	0	Model	3oz7	1	B	0	61.4	98.8	3	413	-	A	0	61.4	98.8	3	413	-	P00560-P00560-MDL-3oz7.pdb1-B-0-A-0.pdb
P00560	PGK_YEAST	YCR012W	P00560	PGK_YEAST	YCR012W	2	0	Model	3oza	2	C	0	60.6	99.3	3	415	-	C	1	60.6	99.3	3	415	-	P00560-P00560-MDL-3oza.pdb2-C-0-C-1.pdb
P00560	PGK_YEAST	YCR012W	P00560	PGK_YEAST	YCR012W	3	0	Model	3oza	1	B	0	60.6	98.8	3	413	-	A	0	60.6	98.8	3	413	-	P00560-P00560-MDL-3oza.pdb1-B-0-A-0.pdb
P32381	ARP2_YEAST	YDL029W	P32381	ARP2_YEAST	YDL029W	1	0	Model	2oan	2	C	0	47.7	96.4	7	383	-	C	1	47.7	96.4	7	383	-	P32381-P32381-MDL-2oan.pdb2-C-0-C-1.pdb
P32381	ARP2_YEAST	YDL029W	P32381	ARP2_YEAST	YDL029W	2	0	Model	2oan	3	A	0	47.7	96.4	7	383	-	A	1	47.7	96.4	7	383	-	P32381-P32381-MDL-2oan.pdb3-A-0-A-1.pdb
P32381	ARP2_YEAST	YDL029W	P32381	ARP2_YEAST	YDL029W	3	0	Model	2oan	1	D	0	47.5	96.4	7	383	-	B	0	47.5	96.4	7	383	-	P32381-P32381-MDL-2oan.pdb1-D-0-B-0.pdb
P32582	CBS_YEAST	YGR155W	P32582	CBS_YEAST	YGR155W	1	0	Model	3pc3	2	A	0	42.3	97.6	13	507	-	A	1	42.3	97.6	13	507	-	P32582-P32582-MDL-3pc3.pdb2-A-0-A-1.pdb
P32582	CBS_YEAST	YGR155W	P32582	CBS_YEAST	YGR155W	2	0	Model	3pc4	2	A	0	42.3	97.6	13	507	-	A	1	42.3	97.6	13	507	-	P32582-P32582-MDL-3pc4.pdb2-A-0-A-1.pdb
P32582	CBS_YEAST	YGR155W	P32582	CBS_YEAST	YGR155W	3	0	Model	3pc4	1	A	0	42.3	97.6	13	507	-	A	1	42.3	97.6	13	507	-	P32582-P32582-MDL-3pc4.pdb1-A-0-A-1.pdb
P39676	FHP_YEAST	YGR234W	P39676	FHP_YEAST	YGR234W	1	0	Model	4g1v	2	A	0	99.7	99.7	2	399	-	A	5	99.7	99.7	2	399	-	P39676-P39676-MDL-4g1v.pdb2-A-0-A-5.pdb
P39676	FHP_YEAST	YGR234W	P39676	FHP_YEAST	YGR234W	2	0	Model	4g1v	2	A	1	99.7	99.7	2	399	-	A	4	99.7	99.7	2	399	-	P39676-P39676-MDL-4g1v.pdb2-A-1-A-4.pdb
P39676	FHP_YEAST	YGR234W	P39676	FHP_YEAST	YGR234W	3	0	Model	4g1v	2	A	2	99.7	99.7	2	399	-	A	3	99.7	99.7	2	399	-	P39676-P39676-MDL-4g1v.pdb2-A-2-A-3.pdb
P32288	GLNA_YEAST	YPR035W	P32288	GLNA_YEAST	YPR035W	1	0	Structure	3fky	1	I	0	96.5	93.5	21	366	-	C	0	98.3	93.5	21	366	-	P32288-P32288-EXP-3fky.pdb1-I-0-C-0.pdb
P32288	GLNA_YEAST	YPR035W	P32288	GLNA_YEAST	YPR035W	2	0	Structure	3fky	1	D	0	96.5	93.5	21	366	-	C	0	98.3	93.5	21	366	-	P32288-P32288-EXP-3fky.pdb1-D-0-C-0.pdb
P32288	GLNA_YEAST	YPR035W	P32288	GLNA_YEAST	YPR035W	3	0	Structure	3fky	1	B	0	96.5	93.5	21	366	-	C	0	98.3	93.5	21	366	-	P32288-P32288-EXP-3fky.pdb1-B-0-C-0.pdb
P32288	GLNA_YEAST	YPR035W	P32288	GLNA_YEAST	YPR035W	4	0	Structure	3fky	2	N	0	96.5	93.5	21	366	-	O	0	96.5	93.5	21	366	-	P32288-P32288-EXP-3fky.pdb2-N-0-O-0.pdb
P32288	GLNA_YEAST	YPR035W	P32288	GLNA_YEAST	YPR035W	5	0	Structure	3fky	1	E	0	96.5	93.5	21	366	-	A	0	96.5	93.5	21	366	-	P32288-P32288-EXP-3fky.pdb1-E-0-A-0.pdb
P32288	GLNA_YEAST	YPR035W	P32288	GLNA_YEAST	YPR035W	6	0	Structure	3fky	2	O	0	96.5	93.5	21	366	-	K	0	96.5	93.5	21	366	-	P32288-P32288-EXP-3fky.pdb2-O-0-K-0.pdb
P32288	GLNA_YEAST	YPR035W	P32288	GLNA_YEAST	YPR035W	7	0	Structure	3fky	1	J	0	96.5	93.5	21	366	-	I	0	96.5	93.5	21	366	-	P32288-P32288-EXP-3fky.pdb1-J-0-I-0.pdb
P32288	GLNA_YEAST	YPR035W	P32288	GLNA_YEAST	YPR035W	8	0	Structure	3fky	2	T	0	96.5	93.5	21	366	-	S	0	96.5	93.5	21	366	-	P32288-P32288-EXP-3fky.pdb2-T-0-S-0.pdb
P32288	GLNA_YEAST	YPR035W	P32288	GLNA_YEAST	YPR035W	9	0	Structure	3fky	2	T	0	96.5	93.5	21	366	-	P	0	96.5	93.5	21	366	-	P32288-P32288-EXP-3fky.pdb2-T-0-P-0.pdb
P32288	GLNA_YEAST	YPR035W	P32288	GLNA_YEAST	YPR035W	10	0	Structure	3fky	2	N	0	96.5	93.5	21	366	-	M	0	96.5	93.5	21	366	-	P32288-P32288-EXP-3fky.pdb2-N-0-M-0.pdb
P32288	GLNA_YEAST	YPR035W	P32288	GLNA_YEAST	YPR035W	11	0	Structure	3fky	2	P	0	96.5	93.5	21	366	-	Q	0	96.5	93.5	21	366	-	P32288-P32288-EXP-3fky.pdb2-P-0-Q-0.pdb
P32288	GLNA_YEAST	YPR035W	P32288	GLNA_YEAST	YPR035W	12	0	Structure	3fky	1	H	0	96.5	93.5	21	366	-	G	0	96.5	93.5	21	366	-	P32288-P32288-EXP-3fky.pdb1-H-0-G-0.pdb
P32288	GLNA_YEAST	YPR035W	P32288	GLNA_YEAST	YPR035W	13	0	Structure	3fky	1	G	0	96.5	93.5	21	366	-	E	0	96.5	93.5	21	366	-	P32288-P32288-EXP-3fky.pdb1-G-0-E-0.pdb
P32288	GLNA_YEAST	YPR035W	P32288	GLNA_YEAST	YPR035W	14	0	Structure	3fky	2	R	0	96.5	93.5	21	366	-	N	0	96.5	93.5	21	366	-	P32288-P32288-EXP-3fky.pdb2-R-0-N-0.pdb
P32288	GLNA_YEAST	YPR035W	P32288	GLNA_YEAST	YPR035W	15	0	Structure	3fky	1	B	0	96.5	93.5	21	366	-	A	0	96.5	93.5	21	366	-	P32288-P32288-EXP-3fky.pdb1-B-0-A-0.pdb
P32288	GLNA_YEAST	YPR035W	P32288	GLNA_YEAST	YPR035W	16	0	Structure	3fky	1	H	0	96.5	93.5	21	366	-	I	0	96.5	93.5	21	366	-	P32288-P32288-EXP-3fky.pdb1-H-0-I-0.pdb
P32288	GLNA_YEAST	YPR035W	P32288	GLNA_YEAST	YPR035W	17	0	Structure	3fky	2	Q	0	96.5	93.5	21	366	-	O	0	96.5	93.5	21	366	-	P32288-P32288-EXP-3fky.pdb2-Q-0-O-0.pdb
P32288	GLNA_YEAST	YPR035W	P32288	GLNA_YEAST	YPR035W	18	0	Structure	3fky	1	J	0	96.5	93.5	21	366	-	F	0	96.5	93.5	21	366	-	P32288-P32288-EXP-3fky.pdb1-J-0-F-0.pdb
P32288	GLNA_YEAST	YPR035W	P32288	GLNA_YEAST	YPR035W	19	0	Structure	3fky	1	F	0	96.5	93.5	21	366	-	A	0	96.5	93.5	21	366	-	P32288-P32288-EXP-3fky.pdb1-F-0-A-0.pdb
P32288	GLNA_YEAST	YPR035W	P32288	GLNA_YEAST	YPR035W	20	0	Structure	3fky	2	R	0	96.5	93.5	21	366	-	Q	0	96.5	93.5	21	366	-	P32288-P32288-EXP-3fky.pdb2-R-0-Q-0.pdb
P32288	GLNA_YEAST	YPR035W	P32288	GLNA_YEAST	YPR035W	21	0	Structure	3fky	1	J	0	96.5	93.5	21	366	-	B	0	96.5	93.5	21	366	-	P32288-P32288-EXP-3fky.pdb1-J-0-B-0.pdb
P32288	GLNA_YEAST	YPR035W	P32288	GLNA_YEAST	YPR035W	22	0	Structure	3fky	1	F	0	96.5	93.5	21	366	-	G	0	96.5	93.5	21	366	-	P32288-P32288-EXP-3fky.pdb1-F-0-G-0.pdb
P32288	GLNA_YEAST	YPR035W	P32288	GLNA_YEAST	YPR035W	23	0	Structure	3fky	2	T	0	96.5	93.5	21	366	-	L	0	96.5	93.5	21	366	-	P32288-P32288-EXP-3fky.pdb2-T-0-L-0.pdb
P32288	GLNA_YEAST	YPR035W	P32288	GLNA_YEAST	YPR035W	24	0	Structure	3fky	1	H	0	96.5	93.5	21	366	-	D	0	96.5	93.5	21	366	-	P32288-P32288-EXP-3fky.pdb1-H-0-D-0.pdb
P32288	GLNA_YEAST	YPR035W	P32288	GLNA_YEAST	YPR035W	25	0	Structure	3fky	2	R	0	96.5	93.5	21	366	-	S	0	96.5	93.5	21	366	-	P32288-P32288-EXP-3fky.pdb2-R-0-S-0.pdb
P32288	GLNA_YEAST	YPR035W	P32288	GLNA_YEAST	YPR035W	26	0	Structure	3fky	2	S	0	96.5	93.5	21	366	-	M	0	96.5	93.5	21	366	-	P32288-P32288-EXP-3fky.pdb2-S-0-M-0.pdb
P32288	GLNA_YEAST	YPR035W	P32288	GLNA_YEAST	YPR035W	27	0	Structure	3fky	1	D	0	96.5	93.5	21	366	-	E	0	96.5	93.5	21	366	-	P32288-P32288-EXP-3fky.pdb1-D-0-E-0.pdb
P32288	GLNA_YEAST	YPR035W	P32288	GLNA_YEAST	YPR035W	28	0	Structure	3fky	2	L	0	96.5	93.5	21	366	-	K	0	96.5	93.5	21	366	-	P32288-P32288-EXP-3fky.pdb2-L-0-K-0.pdb
P32288	GLNA_YEAST	YPR035W	P32288	GLNA_YEAST	YPR035W	29	0	Structure	3fky	2	L	0	96.5	93.5	21	366	-	M	0	96.5	93.5	21	366	-	P32288-P32288-EXP-3fky.pdb2-L-0-M-0.pdb
P32288	GLNA_YEAST	YPR035W	P32288	GLNA_YEAST	YPR035W	30	0	Structure	3fky	2	P	0	96.5	93.5	21	366	-	K	0	96.5	93.5	21	366	-	P32288-P32288-EXP-3fky.pdb2-P-0-K-0.pdb
Q03558	OYE2_YEAST	YHR179W	Q03558	OYE2_YEAST	YHR179W	1	0	Model	3tx9	1	A	0	92.2	99.2	3	399	-	A	1	92.2	99.2	3	399	-	Q03558-Q03558-MDL-3tx9.pdb1-A-0-A-1.pdb
Q03558	OYE2_YEAST	YHR179W	Q03558	OYE2_YEAST	YHR179W	2	0	Model	1oyc	1	A	0	92.2	99.2	3	399	-	A	1	92.2	99.2	3	399	-	Q03558-Q03558-MDL-1oyc.pdb1-A-0-A-1.pdb
Q03558	OYE2_YEAST	YHR179W	Q03558	OYE2_YEAST	YHR179W	3	0	Model	1oya	1	A	0	92.2	99.2	3	399	-	A	1	92.2	99.2	3	399	-	Q03558-Q03558-MDL-1oya.pdb1-A-0-A-1.pdb
P15705	STI1_YEAST	YOR027W	P15705	STI1_YEAST	YOR027W	1	0	Model	2wqh	1	A	0	39.6	16.1	269	363	-	A	1	39.6	16.1	269	363	-	P15705-P15705-MDL-2wqh.pdb1-A-0-A-1.pdb
P00401	COX1_YEAST	Q0045	Q01519	COX12_YEAST	YLR038C	1	0	Model	2dyr	1	A	0	56.8	99.1	2	530	-	H	0	45.9	85.5	10	80	-	P00401-Q01519-MDL-2dyr.pdb1-A-0-H-0.pdb
P00401	COX1_YEAST	Q0045	Q01519	COX12_YEAST	YLR038C	2	0	Model	3ag3	1	A	0	56.8	99.1	2	530	-	H	0	45.9	85.5	10	80	-	P00401-Q01519-MDL-3ag3.pdb1-A-0-H-0.pdb
P00401	COX1_YEAST	Q0045	Q01519	COX12_YEAST	YLR038C	3	0	Model	3ag3	2	N	0	56.8	99.1	2	530	-	U	0	45.9	85.5	10	80	-	P00401-Q01519-MDL-3ag3.pdb2-N-0-U-0.pdb
P00427	COX6_YEAST	YHR051W	P04037	COX4_YEAST	YGL187C	1	0	Model	3ag2	2	R	0	40.4	65.5	47	143	-	S	0	38.5	61.3	51	145	-	P00427-P04037-MDL-3ag2.pdb2-R-0-S-0.pdb
P00427	COX6_YEAST	YHR051W	P04037	COX4_YEAST	YGL187C	2	0	Model	3ag3	2	R	0	40.4	65.5	47	143	-	S	0	38.5	61.3	51	145	-	P00427-P04037-MDL-3ag3.pdb2-R-0-S-0.pdb
P00427	COX6_YEAST	YHR051W	P04037	COX4_YEAST	YGL187C	3	0	Model	2dyr	1	R	0	40.4	65.5	47	143	-	S	0	38.5	61.3	51	145	-	P00427-P04037-MDL-2dyr.pdb1-R-0-S-0.pdb
Q01519	COX12_YEAST	YLR038C	Q01519	COX12_YEAST	YLR038C	1	0	Model	2dyr	1	U	0	45.9	85.5	10	80	-	H	0	45.9	85.5	10	80	-	Q01519-Q01519-MDL-2dyr.pdb1-U-0-H-0.pdb
Q01519	COX12_YEAST	YLR038C	Q01519	COX12_YEAST	YLR038C	2	0	Model	1v54	1	U	0	45.9	85.5	10	80	-	H	0	45.9	85.5	10	80	-	Q01519-Q01519-MDL-1v54.pdb1-U-0-H-0.pdb
Q01519	COX12_YEAST	YLR038C	Q01519	COX12_YEAST	YLR038C	3	0	Model	1v55	1	U	0	45.9	85.5	10	80	-	H	0	45.9	85.5	10	80	-	Q01519-Q01519-MDL-1v55.pdb1-U-0-H-0.pdb
P32830	TIM12_YEAST	YBR091C	P87108	TIM10_YEAST	YHR005C-A	1	0	Dom_dom_model	2bsk	-	E	-	23.7	51.4	25	82	zf-Tim10_DDP	F	-	36.8	60.2	26	82	zf-Tim10_DDP	P32830-P87108-MDD-zf-Tim10_DDP-zf-Tim10_DDP-2bsk-E-13-70-F-14-72.pdb
O74700	TIM9_YEAST	YEL020W-A	P87108	TIM10_YEAST	YHR005C-A	1	0	Structure	3dxr	2	A	1	100	79.3	12	80	-	B	5	100	74.2	15	83	-	O74700-P87108-EXP-3dxr.pdb2-A-1-B-5.pdb
O74700	TIM9_YEAST	YEL020W-A	P87108	TIM10_YEAST	YHR005C-A	2	0	Structure	3dxr	2	A	3	100	79.3	12	80	-	B	4	100	74.2	15	83	-	O74700-P87108-EXP-3dxr.pdb2-A-3-B-4.pdb
O74700	TIM9_YEAST	YEL020W-A	P87108	TIM10_YEAST	YHR005C-A	3	0	Structure	3dxr	2	A	3	100	79.3	12	80	-	B	3	100	74.2	15	83	-	O74700-P87108-EXP-3dxr.pdb2-A-3-B-3.pdb
O74700	TIM9_YEAST	YEL020W-A	P87108	TIM10_YEAST	YHR005C-A	4	0	Structure	3dxr	2	A	2	100	79.3	12	80	-	B	4	100	74.2	15	83	-	O74700-P87108-EXP-3dxr.pdb2-A-2-B-4.pdb
O74700	TIM9_YEAST	YEL020W-A	P87108	TIM10_YEAST	YHR005C-A	5	0	Structure	3dxr	1	A	0	100	79.3	12	80	-	B	0	100	74.2	15	83	-	O74700-P87108-EXP-3dxr.pdb1-A-0-B-0.pdb
O74700	TIM9_YEAST	YEL020W-A	P87108	TIM10_YEAST	YHR005C-A	6	0	Structure	3dxr	2	A	5	100	79.3	12	80	-	B	1	100	74.2	15	83	-	O74700-P87108-EXP-3dxr.pdb2-A-5-B-1.pdb
O74700	TIM9_YEAST	YEL020W-A	P87108	TIM10_YEAST	YHR005C-A	7	0	Structure	3dxr	1	A	2	100	79.3	12	80	-	B	2	100	74.2	15	83	-	O74700-P87108-EXP-3dxr.pdb1-A-2-B-2.pdb
O74700	TIM9_YEAST	YEL020W-A	P87108	TIM10_YEAST	YHR005C-A	8	0	Structure	3dxr	2	A	4	100	79.3	12	80	-	B	2	100	74.2	15	83	-	O74700-P87108-EXP-3dxr.pdb2-A-4-B-2.pdb
O74700	TIM9_YEAST	YEL020W-A	P87108	TIM10_YEAST	YHR005C-A	9	0	Structure	3dxr	2	A	1	100	79.3	12	80	-	B	1	100	74.2	15	83	-	O74700-P87108-EXP-3dxr.pdb2-A-1-B-1.pdb
O74700	TIM9_YEAST	YEL020W-A	P87108	TIM10_YEAST	YHR005C-A	10	0	Structure	3dxr	1	A	1	100	79.3	12	80	-	B	2	100	74.2	15	83	-	O74700-P87108-EXP-3dxr.pdb1-A-1-B-2.pdb
O74700	TIM9_YEAST	YEL020W-A	P87108	TIM10_YEAST	YHR005C-A	11	0	Structure	3dxr	2	A	2	100	79.3	12	80	-	B	0	100	74.2	15	83	-	O74700-P87108-EXP-3dxr.pdb2-A-2-B-0.pdb
O74700	TIM9_YEAST	YEL020W-A	P87108	TIM10_YEAST	YHR005C-A	12	0	Structure	3dxr	2	A	5	100	79.3	12	80	-	B	3	100	74.2	15	83	-	O74700-P87108-EXP-3dxr.pdb2-A-5-B-3.pdb
O74700	TIM9_YEAST	YEL020W-A	P87108	TIM10_YEAST	YHR005C-A	13	0	Structure	3dxr	1	A	1	100	79.3	12	80	-	B	1	100	74.2	15	83	-	O74700-P87108-EXP-3dxr.pdb1-A-1-B-1.pdb
O74700	TIM9_YEAST	YEL020W-A	P87108	TIM10_YEAST	YHR005C-A	14	0	Structure	3dxr	2	A	4	100	79.3	12	80	-	B	5	100	74.2	15	83	-	O74700-P87108-EXP-3dxr.pdb2-A-4-B-5.pdb
O74700	TIM9_YEAST	YEL020W-A	P87108	TIM10_YEAST	YHR005C-A	15	0	Structure	3dxr	2	A	1	100	79.3	12	80	-	B	2	100	74.2	15	83	-	O74700-P87108-EXP-3dxr.pdb2-A-1-B-2.pdb
O74700	TIM9_YEAST	YEL020W-A	P87108	TIM10_YEAST	YHR005C-A	16	0	Structure	3dxr	2	A	4	100	79.3	12	80	-	B	4	100	74.2	15	83	-	O74700-P87108-EXP-3dxr.pdb2-A-4-B-4.pdb
O74700	TIM9_YEAST	YEL020W-A	P87108	TIM10_YEAST	YHR005C-A	17	0	Structure	3dxr	2	A	0	100	79.3	12	80	-	B	0	100	74.2	15	83	-	O74700-P87108-EXP-3dxr.pdb2-A-0-B-0.pdb
O74700	TIM9_YEAST	YEL020W-A	P87108	TIM10_YEAST	YHR005C-A	18	0	Structure	3dxr	2	A	0	100	79.3	12	80	-	B	3	100	74.2	15	83	-	O74700-P87108-EXP-3dxr.pdb2-A-0-B-3.pdb
O74700	TIM9_YEAST	YEL020W-A	P87108	TIM10_YEAST	YHR005C-A	19	0	Structure	3dxr	2	A	5	100	79.3	12	80	-	B	5	100	74.2	15	83	-	O74700-P87108-EXP-3dxr.pdb2-A-5-B-5.pdb
O74700	TIM9_YEAST	YEL020W-A	P87108	TIM10_YEAST	YHR005C-A	20	0	Structure	3dxr	1	A	2	100	79.3	12	80	-	B	0	100	74.2	15	83	-	O74700-P87108-EXP-3dxr.pdb1-A-2-B-0.pdb
O74700	TIM9_YEAST	YEL020W-A	P87108	TIM10_YEAST	YHR005C-A	21	0	Structure	3dxr	2	A	3	100	79.3	12	80	-	B	0	100	74.2	15	83	-	O74700-P87108-EXP-3dxr.pdb2-A-3-B-0.pdb
O74700	TIM9_YEAST	YEL020W-A	P87108	TIM10_YEAST	YHR005C-A	22	0	Structure	3dxr	1	A	0	100	79.3	12	80	-	B	1	100	74.2	15	83	-	O74700-P87108-EXP-3dxr.pdb1-A-0-B-1.pdb
O74700	TIM9_YEAST	YEL020W-A	P87108	TIM10_YEAST	YHR005C-A	23	0	Structure	3dxr	2	A	2	100	79.3	12	80	-	B	2	100	74.2	15	83	-	O74700-P87108-EXP-3dxr.pdb2-A-2-B-2.pdb
O74700	TIM9_YEAST	YEL020W-A	P87108	TIM10_YEAST	YHR005C-A	24	0	Structure	3dxr	2	A	0	100	79.3	12	80	-	B	1	100	74.2	15	83	-	O74700-P87108-EXP-3dxr.pdb2-A-0-B-1.pdb
O74700	TIM9_YEAST	YEL020W-A	P32830	TIM12_YEAST	YBR091C	1	0	Model	3dxr	2	A	0	100	79.3	12	80	-	B	0	36.8	62.4	15	82	-	O74700-P32830-MDL-3dxr.pdb2-A-0-B-0.pdb
O74700	TIM9_YEAST	YEL020W-A	P32830	TIM12_YEAST	YBR091C	2	0	Model	3dxr	2	A	1	100	79.3	12	80	-	B	1	36.8	62.4	15	82	-	O74700-P32830-MDL-3dxr.pdb2-A-1-B-1.pdb
O74700	TIM9_YEAST	YEL020W-A	P32830	TIM12_YEAST	YBR091C	3	0	Model	3dxr	2	A	4	100	79.3	12	80	-	B	4	36.8	62.4	15	82	-	O74700-P32830-MDL-3dxr.pdb2-A-4-B-4.pdb
P87108	TIM10_YEAST	YHR005C-A	P87108	TIM10_YEAST	YHR005C-A	1	0	Structure	3dxr	2	B	0	100	74.2	15	83	-	B	3	100	74.2	15	83	-	P87108-P87108-EXP-3dxr.pdb2-B-0-B-3.pdb
P87108	TIM10_YEAST	YHR005C-A	P87108	TIM10_YEAST	YHR005C-A	2	0	Structure	3dxr	2	B	2	100	74.2	15	83	-	B	4	100	74.2	15	83	-	P87108-P87108-EXP-3dxr.pdb2-B-2-B-4.pdb
P87108	TIM10_YEAST	YHR005C-A	P87108	TIM10_YEAST	YHR005C-A	3	0	Structure	3dxr	2	B	1	100	74.2	15	83	-	B	5	100	74.2	15	83	-	P87108-P87108-EXP-3dxr.pdb2-B-1-B-5.pdb
P32830	TIM12_YEAST	YBR091C	P32830	TIM12_YEAST	YBR091C	1	0	Model	3dxr	2	B	1	36.8	62.4	15	82	-	B	5	36.8	62.4	15	82	-	P32830-P32830-MDL-3dxr.pdb2-B-1-B-5.pdb
P32830	TIM12_YEAST	YBR091C	P32830	TIM12_YEAST	YBR091C	2	0	Model	3dxr	2	B	2	36.8	62.4	15	82	-	B	4	36.8	62.4	15	82	-	P32830-P32830-MDL-3dxr.pdb2-B-2-B-4.pdb
P32830	TIM12_YEAST	YBR091C	P32830	TIM12_YEAST	YBR091C	3	0	Model	3dxr	2	B	0	36.8	62.4	15	82	-	B	3	36.8	62.4	15	82	-	P32830-P32830-MDL-3dxr.pdb2-B-0-B-3.pdb
P07143	CY1_YEAST	YOR065W	P07256	QCR1_YEAST	YBL045C	1	0	Structure	3cx5	1	O	0	100	80.3	62	309	-	L	0	99.8	94.3	27	457	-	P07143-P07256-EXP-3cx5.pdb1-O-0-L-0.pdb
P07143	CY1_YEAST	YOR065W	P07256	QCR1_YEAST	YBL045C	2	0	Structure	3cx5	1	D	0	100	80.3	62	309	-	A	0	99.8	94.3	27	457	-	P07143-P07256-EXP-3cx5.pdb1-D-0-A-0.pdb
P07143	CY1_YEAST	YOR065W	P07256	QCR1_YEAST	YBL045C	3	0	Structure	3cxh	1	O	0	100	79.6	62	307	-	L	0	99.8	94.3	27	457	-	P07143-P07256-EXP-3cxh.pdb1-O-0-L-0.pdb
P00127	QCR6_YEAST	YFR033C	P07143	CY1_YEAST	YOR065W	1	0	Structure	3cx5	1	F	0	100	50.3	74	147	-	D	0	100	80.3	62	309	-	P00127-P07143-EXP-3cx5.pdb1-F-0-D-0.pdb
P00127	QCR6_YEAST	YFR033C	P07143	CY1_YEAST	YOR065W	2	0	Structure	3cx5	1	Q	0	100	50.3	74	147	-	O	0	100	80.3	62	309	-	P00127-P07143-EXP-3cx5.pdb1-Q-0-O-0.pdb
P00127	QCR6_YEAST	YFR033C	P07143	CY1_YEAST	YOR065W	3	0	Structure	1kb9	1	F	0	100	50.3	74	147	-	D	0	100	79.6	62	307	-	P00127-P07143-EXP-1kb9.pdb1-F-0-D-0.pdb
P00127	QCR6_YEAST	YFR033C	P07143	CY1_YEAST	YOR065W	4	0	Structure	1ezv	1	H	0	100	50.3	74	147	-	D	0	100	79.3	62	306	-	P00127-P07143-EXP-1ezv.pdb1-H-0-D-0.pdb
P00127	QCR6_YEAST	YFR033C	P07143	CY1_YEAST	YOR065W	5	0	Structure	2ibz	1	H	0	100	50.3	74	147	-	D	0	100	79.3	62	306	-	P00127-P07143-EXP-2ibz.pdb1-H-0-D-0.pdb
P00127	QCR6_YEAST	YFR033C	P07143	CY1_YEAST	YOR065W	6	0	Structure	1ezv	1	H	1	100	50.3	74	147	-	D	1	100	79.3	62	306	-	P00127-P07143-EXP-1ezv.pdb1-H-1-D-1.pdb
P00127	QCR6_YEAST	YFR033C	P07143	CY1_YEAST	YOR065W	7	0	Structure	1p84	1	F	1	100	50.3	74	147	-	D	1	100	79.6	62	307	-	P00127-P07143-EXP-1p84.pdb1-F-1-D-1.pdb
P00127	QCR6_YEAST	YFR033C	P07143	CY1_YEAST	YOR065W	8	0	Structure	3cxh	1	Q	0	100	50.3	74	147	-	O	0	100	79.6	62	307	-	P00127-P07143-EXP-3cxh.pdb1-Q-0-O-0.pdb
P00127	QCR6_YEAST	YFR033C	P07143	CY1_YEAST	YOR065W	9	0	Structure	1p84	1	F	0	100	50.3	74	147	-	D	0	100	79.6	62	307	-	P00127-P07143-EXP-1p84.pdb1-F-0-D-0.pdb
P00127	QCR6_YEAST	YFR033C	P07143	CY1_YEAST	YOR065W	10	0	Structure	3cxh	1	F	0	100	50.3	74	147	-	D	0	100	79.6	62	307	-	P00127-P07143-EXP-3cxh.pdb1-F-0-D-0.pdb
P00127	QCR6_YEAST	YFR033C	P07143	CY1_YEAST	YOR065W	11	0	Structure	1kyo	1	Q	0	100	49.7	75	147	-	O	0	100	79.3	62	306	-	P00127-P07143-EXP-1kyo.pdb1-Q-0-O-0.pdb
P00127	QCR6_YEAST	YFR033C	P07143	CY1_YEAST	YOR065W	12	0	Structure	1kyo	1	F	0	100	49.7	75	147	-	D	0	100	79.3	62	306	-	P00127-P07143-EXP-1kyo.pdb1-F-0-D-0.pdb
P00128	QCR7_YEAST	YDR529C	P07143	CY1_YEAST	YOR065W	1	0	Structure	3cx5	1	G	0	100	99.2	2	127	-	D	0	100	80.3	62	309	-	P00128-P07143-EXP-3cx5.pdb1-G-0-D-0.pdb
P00128	QCR7_YEAST	YDR529C	P07143	CY1_YEAST	YOR065W	2	0	Structure	3cx5	1	R	0	100	99.2	2	127	-	O	0	100	80.3	62	309	-	P00128-P07143-EXP-3cx5.pdb1-R-0-O-0.pdb
P00128	QCR7_YEAST	YDR529C	P07143	CY1_YEAST	YOR065W	3	0	Structure	1kb9	1	G	0	100	98.4	3	127	-	D	0	100	79.6	62	307	-	P00128-P07143-EXP-1kb9.pdb1-G-0-D-0.pdb
P00128	QCR7_YEAST	YDR529C	P07143	CY1_YEAST	YOR065W	4	0	Structure	1ezv	1	F	1	100	98.4	3	127	-	D	1	100	79.3	62	306	-	P00128-P07143-EXP-1ezv.pdb1-F-1-D-1.pdb
P00128	QCR7_YEAST	YDR529C	P07143	CY1_YEAST	YOR065W	5	0	Structure	1ezv	1	F	0	100	98.4	3	127	-	D	0	100	79.3	62	306	-	P00128-P07143-EXP-1ezv.pdb1-F-0-D-0.pdb
P00128	QCR7_YEAST	YDR529C	P07143	CY1_YEAST	YOR065W	6	0	Structure	2ibz	1	F	0	100	98.4	3	127	-	D	0	100	79.3	62	306	-	P00128-P07143-EXP-2ibz.pdb1-F-0-D-0.pdb
P00128	QCR7_YEAST	YDR529C	P07143	CY1_YEAST	YOR065W	7	0	Structure	3cxh	1	R	0	100	98.4	3	127	-	O	0	100	79.6	62	307	-	P00128-P07143-EXP-3cxh.pdb1-R-0-O-0.pdb
P00128	QCR7_YEAST	YDR529C	P07143	CY1_YEAST	YOR065W	8	0	Structure	1p84	1	G	0	100	98.4	3	127	-	D	0	100	79.6	62	307	-	P00128-P07143-EXP-1p84.pdb1-G-0-D-0.pdb
P00128	QCR7_YEAST	YDR529C	P07143	CY1_YEAST	YOR065W	9	0	Structure	1p84	1	G	1	100	98.4	3	127	-	D	1	100	79.6	62	307	-	P00128-P07143-EXP-1p84.pdb1-G-1-D-1.pdb
P00128	QCR7_YEAST	YDR529C	P07143	CY1_YEAST	YOR065W	10	0	Structure	3cxh	1	G	0	100	98.4	3	127	-	D	0	100	79.6	62	307	-	P00128-P07143-EXP-3cxh.pdb1-G-0-D-0.pdb
P00128	QCR7_YEAST	YDR529C	P07143	CY1_YEAST	YOR065W	11	0	Structure	1kyo	1	G	0	100	98.4	3	127	-	D	0	100	79.3	62	306	-	P00128-P07143-EXP-1kyo.pdb1-G-0-D-0.pdb
P00128	QCR7_YEAST	YDR529C	P07143	CY1_YEAST	YOR065W	12	0	Structure	1kyo	1	R	0	100	98.4	3	127	-	O	0	100	79.3	62	306	-	P00128-P07143-EXP-1kyo.pdb1-R-0-O-0.pdb
P07143	CY1_YEAST	YOR065W	P08067	UCRI_YEAST	YEL024W	1	0	Structure	3cx5	1	O	0	100	80.3	62	309	-	P	0	100	86	31	215	-	P07143-P08067-EXP-3cx5.pdb1-O-0-P-0.pdb
P07143	CY1_YEAST	YOR065W	P08067	UCRI_YEAST	YEL024W	2	0	Structure	3cx5	1	D	0	100	80.3	62	309	-	E	0	100	86	31	215	-	P07143-P08067-EXP-3cx5.pdb1-D-0-E-0.pdb
P07143	CY1_YEAST	YOR065W	P08067	UCRI_YEAST	YEL024W	3	0	Structure	1kb9	1	D	0	100	79.6	62	307	-	E	0	100	86	31	215	-	P07143-P08067-EXP-1kb9.pdb1-D-0-E-0.pdb
P07143	CY1_YEAST	YOR065W	P08067	UCRI_YEAST	YEL024W	4	0	Structure	2ibz	1	D	0	100	79.3	62	306	-	E	0	100	86	31	215	-	P07143-P08067-EXP-2ibz.pdb1-D-0-E-0.pdb
P07143	CY1_YEAST	YOR065W	P08067	UCRI_YEAST	YEL024W	5	0	Structure	1ezv	1	D	0	100	79.3	62	306	-	E	0	100	86	31	215	-	P07143-P08067-EXP-1ezv.pdb1-D-0-E-0.pdb
P07143	CY1_YEAST	YOR065W	P08067	UCRI_YEAST	YEL024W	6	0	Structure	1ezv	1	D	1	100	79.3	62	306	-	E	1	100	86	31	215	-	P07143-P08067-EXP-1ezv.pdb1-D-1-E-1.pdb
P07143	CY1_YEAST	YOR065W	P08067	UCRI_YEAST	YEL024W	7	0	Structure	1p84	1	D	1	100	79.6	62	307	-	E	1	100	86	31	215	-	P07143-P08067-EXP-1p84.pdb1-D-1-E-1.pdb
P07143	CY1_YEAST	YOR065W	P08067	UCRI_YEAST	YEL024W	8	0	Structure	3cxh	1	O	0	100	79.6	62	307	-	P	0	100	86	31	215	-	P07143-P08067-EXP-3cxh.pdb1-O-0-P-0.pdb
P07143	CY1_YEAST	YOR065W	P08067	UCRI_YEAST	YEL024W	9	0	Structure	3cxh	1	D	0	100	79.6	62	307	-	E	0	100	86	31	215	-	P07143-P08067-EXP-3cxh.pdb1-D-0-E-0.pdb
P07143	CY1_YEAST	YOR065W	P08067	UCRI_YEAST	YEL024W	10	0	Structure	1p84	1	D	0	100	79.6	62	307	-	E	0	100	86	31	215	-	P07143-P08067-EXP-1p84.pdb1-D-0-E-0.pdb
P07143	CY1_YEAST	YOR065W	P08067	UCRI_YEAST	YEL024W	11	0	Structure	1kyo	1	D	0	100	79.3	62	306	-	E	0	100	86	31	215	-	P07143-P08067-EXP-1kyo.pdb1-D-0-E-0.pdb
P07143	CY1_YEAST	YOR065W	P08067	UCRI_YEAST	YEL024W	12	0	Structure	1kyo	1	O	0	100	79.3	62	306	-	P	0	100	86	31	215	-	P07143-P08067-EXP-1kyo.pdb1-O-0-P-0.pdb
P07256	QCR1_YEAST	YBL045C	P07257	QCR2_YEAST	YPR191W	1	0	Structure	3cx5	1	L	0	99.8	94.3	27	457	-	M	0	100	95.7	17	368	-	P07256-P07257-EXP-3cx5.pdb1-L-0-M-0.pdb
P07256	QCR1_YEAST	YBL045C	P07257	QCR2_YEAST	YPR191W	2	0	Structure	3cx5	1	A	0	99.8	94.3	27	457	-	B	0	100	95.7	17	368	-	P07256-P07257-EXP-3cx5.pdb1-A-0-B-0.pdb
P07256	QCR1_YEAST	YBL045C	P07257	QCR2_YEAST	YPR191W	3	0	Structure	2ibz	1	A	0	99.8	94.3	27	457	-	B	0	100	95.7	17	368	-	P07256-P07257-EXP-2ibz.pdb1-A-0-B-0.pdb
P07256	QCR1_YEAST	YBL045C	P07257	QCR2_YEAST	YPR191W	4	0	Structure	1kb9	1	A	0	99.8	94.3	27	457	-	B	0	100	95.7	17	368	-	P07256-P07257-EXP-1kb9.pdb1-A-0-B-0.pdb
P07256	QCR1_YEAST	YBL045C	P07257	QCR2_YEAST	YPR191W	5	0	Structure	1ezv	1	A	1	99.5	94.3	27	457	-	B	1	100	95.7	17	368	-	P07256-P07257-EXP-1ezv.pdb1-A-1-B-1.pdb
P07256	QCR1_YEAST	YBL045C	P07257	QCR2_YEAST	YPR191W	6	0	Structure	1ezv	1	A	0	99.5	94.3	27	457	-	B	0	100	95.7	17	368	-	P07256-P07257-EXP-1ezv.pdb1-A-0-B-0.pdb
P07256	QCR1_YEAST	YBL045C	P07257	QCR2_YEAST	YPR191W	7	0	Structure	3cxh	1	A	0	99.8	94.3	27	457	-	B	0	100	95.7	17	368	-	P07256-P07257-EXP-3cxh.pdb1-A-0-B-0.pdb
P07256	QCR1_YEAST	YBL045C	P07257	QCR2_YEAST	YPR191W	8	0	Structure	3cxh	1	L	0	99.8	94.3	27	457	-	M	0	100	95.7	17	368	-	P07256-P07257-EXP-3cxh.pdb1-L-0-M-0.pdb
P07256	QCR1_YEAST	YBL045C	P07257	QCR2_YEAST	YPR191W	9	0	Structure	1p84	1	A	0	99.8	94.3	27	457	-	B	0	100	95.7	17	368	-	P07256-P07257-EXP-1p84.pdb1-A-0-B-0.pdb
P07256	QCR1_YEAST	YBL045C	P07257	QCR2_YEAST	YPR191W	10	0	Structure	1p84	1	A	1	99.8	94.3	27	457	-	B	1	100	95.7	17	368	-	P07256-P07257-EXP-1p84.pdb1-A-1-B-1.pdb
P07256	QCR1_YEAST	YBL045C	P07257	QCR2_YEAST	YPR191W	11	0	Structure	1kyo	1	A	0	99.5	94.3	27	457	-	B	0	100	95.7	17	368	-	P07256-P07257-EXP-1kyo.pdb1-A-0-B-0.pdb
P07256	QCR1_YEAST	YBL045C	P07257	QCR2_YEAST	YPR191W	12	0	Structure	1kyo	1	L	0	99.5	94.3	27	457	-	M	0	100	95.7	17	368	-	P07256-P07257-EXP-1kyo.pdb1-L-0-M-0.pdb
P00128	QCR7_YEAST	YDR529C	P07256	QCR1_YEAST	YBL045C	1	0	Structure	3cx5	1	R	0	100	99.2	2	127	-	A	0	99.8	94.3	27	457	-	P00128-P07256-EXP-3cx5.pdb1-R-0-A-0.pdb
P00128	QCR7_YEAST	YDR529C	P07256	QCR1_YEAST	YBL045C	2	0	Structure	3cx5	1	G	0	100	99.2	2	127	-	L	0	99.8	94.3	27	457	-	P00128-P07256-EXP-3cx5.pdb1-G-0-L-0.pdb
P00128	QCR7_YEAST	YDR529C	P07256	QCR1_YEAST	YBL045C	3	0	Structure	1ezv	1	F	1	100	98.4	3	127	-	A	0	99.5	94.3	27	457	-	P00128-P07256-EXP-1ezv.pdb1-F-1-A-0.pdb
P00128	QCR7_YEAST	YDR529C	P07256	QCR1_YEAST	YBL045C	4	0	Structure	1ezv	1	F	0	100	98.4	3	127	-	A	1	99.5	94.3	27	457	-	P00128-P07256-EXP-1ezv.pdb1-F-0-A-1.pdb
P00128	QCR7_YEAST	YDR529C	P07256	QCR1_YEAST	YBL045C	5	0	Structure	3cxh	1	R	0	100	98.4	3	127	-	A	0	99.8	94.3	27	457	-	P00128-P07256-EXP-3cxh.pdb1-R-0-A-0.pdb
P00128	QCR7_YEAST	YDR529C	P07256	QCR1_YEAST	YBL045C	6	0	Structure	3cxh	1	G	0	100	98.4	3	127	-	L	0	99.8	94.3	27	457	-	P00128-P07256-EXP-3cxh.pdb1-G-0-L-0.pdb
P00128	QCR7_YEAST	YDR529C	P07256	QCR1_YEAST	YBL045C	7	0	Structure	1p84	1	G	1	100	98.4	3	127	-	A	0	99.8	94.3	27	457	-	P00128-P07256-EXP-1p84.pdb1-G-1-A-0.pdb
P00128	QCR7_YEAST	YDR529C	P07256	QCR1_YEAST	YBL045C	8	0	Structure	1p84	1	G	0	100	98.4	3	127	-	A	1	99.8	94.3	27	457	-	P00128-P07256-EXP-1p84.pdb1-G-0-A-1.pdb
P00128	QCR7_YEAST	YDR529C	P07256	QCR1_YEAST	YBL045C	9	0	Structure	1kyo	1	R	0	100	98.4	3	127	-	A	0	99.5	94.3	27	457	-	P00128-P07256-EXP-1kyo.pdb1-R-0-A-0.pdb
P00128	QCR7_YEAST	YDR529C	P07256	QCR1_YEAST	YBL045C	10	0	Structure	1kyo	1	G	0	100	98.4	3	127	-	L	0	99.5	94.3	27	457	-	P00128-P07256-EXP-1kyo.pdb1-G-0-L-0.pdb
P07256	QCR1_YEAST	YBL045C	P08067	UCRI_YEAST	YEL024W	1	0	Structure	3cx5	1	A	0	99.8	94.3	27	457	-	E	0	100	86	31	215	-	P07256-P08067-EXP-3cx5.pdb1-A-0-E-0.pdb
P07256	QCR1_YEAST	YBL045C	P08067	UCRI_YEAST	YEL024W	2	0	Structure	3cx5	1	L	0	99.8	94.3	27	457	-	P	0	100	86	31	215	-	P07256-P08067-EXP-3cx5.pdb1-L-0-P-0.pdb
P07256	QCR1_YEAST	YBL045C	P08067	UCRI_YEAST	YEL024W	3	0	Structure	1kb9	1	A	0	99.8	94.3	27	457	-	E	0	100	86	31	215	-	P07256-P08067-EXP-1kb9.pdb1-A-0-E-0.pdb
P07256	QCR1_YEAST	YBL045C	P08067	UCRI_YEAST	YEL024W	4	0	Structure	2ibz	1	A	0	99.8	94.3	27	457	-	E	0	100	86	31	215	-	P07256-P08067-EXP-2ibz.pdb1-A-0-E-0.pdb
P07256	QCR1_YEAST	YBL045C	P08067	UCRI_YEAST	YEL024W	5	0	Structure	1ezv	1	A	1	99.5	94.3	27	457	-	E	1	100	86	31	215	-	P07256-P08067-EXP-1ezv.pdb1-A-1-E-1.pdb
P07256	QCR1_YEAST	YBL045C	P08067	UCRI_YEAST	YEL024W	6	0	Structure	1ezv	1	A	0	99.5	94.3	27	457	-	E	0	100	86	31	215	-	P07256-P08067-EXP-1ezv.pdb1-A-0-E-0.pdb
P07256	QCR1_YEAST	YBL045C	P08067	UCRI_YEAST	YEL024W	7	0	Structure	3cxh	1	L	0	99.8	94.3	27	457	-	P	0	100	86	31	215	-	P07256-P08067-EXP-3cxh.pdb1-L-0-P-0.pdb
P07256	QCR1_YEAST	YBL045C	P08067	UCRI_YEAST	YEL024W	8	0	Structure	1p84	1	A	1	99.8	94.3	27	457	-	E	1	100	86	31	215	-	P07256-P08067-EXP-1p84.pdb1-A-1-E-1.pdb
P07256	QCR1_YEAST	YBL045C	P08067	UCRI_YEAST	YEL024W	9	0	Structure	3cxh	1	A	0	99.8	94.3	27	457	-	E	0	100	86	31	215	-	P07256-P08067-EXP-3cxh.pdb1-A-0-E-0.pdb
P07256	QCR1_YEAST	YBL045C	P08067	UCRI_YEAST	YEL024W	10	0	Structure	1p84	1	A	0	99.8	94.3	27	457	-	E	0	100	86	31	215	-	P07256-P08067-EXP-1p84.pdb1-A-0-E-0.pdb
P07256	QCR1_YEAST	YBL045C	P08067	UCRI_YEAST	YEL024W	11	0	Structure	1kyo	1	L	0	99.5	94.3	27	457	-	P	0	100	86	31	215	-	P07256-P08067-EXP-1kyo.pdb1-L-0-P-0.pdb
P07256	QCR1_YEAST	YBL045C	P08067	UCRI_YEAST	YEL024W	12	0	Structure	1kyo	1	A	0	99.5	94.3	27	457	-	E	0	100	86	31	215	-	P07256-P08067-EXP-1kyo.pdb1-A-0-E-0.pdb
P00128	QCR7_YEAST	YDR529C	P07257	QCR2_YEAST	YPR191W	1	0	Structure	3cx5	1	G	0	100	99.2	2	127	-	M	0	100	95.7	17	368	-	P00128-P07257-EXP-3cx5.pdb1-G-0-M-0.pdb
P00128	QCR7_YEAST	YDR529C	P07257	QCR2_YEAST	YPR191W	2	0	Structure	3cx5	1	R	0	100	99.2	2	127	-	B	0	100	95.7	17	368	-	P00128-P07257-EXP-3cx5.pdb1-R-0-B-0.pdb
P00128	QCR7_YEAST	YDR529C	P07257	QCR2_YEAST	YPR191W	3	0	Structure	1ezv	1	F	1	100	98.4	3	127	-	B	0	100	95.7	17	368	-	P00128-P07257-EXP-1ezv.pdb1-F-1-B-0.pdb
P00128	QCR7_YEAST	YDR529C	P07257	QCR2_YEAST	YPR191W	4	0	Structure	1ezv	1	F	0	100	98.4	3	127	-	B	1	100	95.7	17	368	-	P00128-P07257-EXP-1ezv.pdb1-F-0-B-1.pdb
P00128	QCR7_YEAST	YDR529C	P07257	QCR2_YEAST	YPR191W	5	0	Structure	3cxh	1	R	0	100	98.4	3	127	-	B	0	100	95.7	17	368	-	P00128-P07257-EXP-3cxh.pdb1-R-0-B-0.pdb
P00128	QCR7_YEAST	YDR529C	P07257	QCR2_YEAST	YPR191W	6	0	Structure	1p84	1	G	1	100	98.4	3	127	-	B	0	100	95.7	17	368	-	P00128-P07257-EXP-1p84.pdb1-G-1-B-0.pdb
P00128	QCR7_YEAST	YDR529C	P07257	QCR2_YEAST	YPR191W	7	0	Structure	1p84	1	G	0	100	98.4	3	127	-	B	1	100	95.7	17	368	-	P00128-P07257-EXP-1p84.pdb1-G-0-B-1.pdb
P00128	QCR7_YEAST	YDR529C	P07257	QCR2_YEAST	YPR191W	8	0	Structure	3cxh	1	G	0	100	98.4	3	127	-	M	0	100	95.7	17	368	-	P00128-P07257-EXP-3cxh.pdb1-G-0-M-0.pdb
P00128	QCR7_YEAST	YDR529C	P07257	QCR2_YEAST	YPR191W	9	0	Structure	1kyo	1	R	0	100	98.4	3	127	-	B	0	100	95.7	17	368	-	P00128-P07257-EXP-1kyo.pdb1-R-0-B-0.pdb
P00128	QCR7_YEAST	YDR529C	P07257	QCR2_YEAST	YPR191W	10	0	Structure	1kyo	1	G	0	100	98.4	3	127	-	M	0	100	95.7	17	368	-	P00128-P07257-EXP-1kyo.pdb1-G-0-M-0.pdb
P07143	CY1_YEAST	YOR065W	P07143	CY1_YEAST	YOR065W	1	0	Structure	3cx5	1	O	0	100	80.3	62	309	-	D	0	100	80.3	62	309	-	P07143-P07143-EXP-3cx5.pdb1-O-0-D-0.pdb
P07143	CY1_YEAST	YOR065W	P07143	CY1_YEAST	YOR065W	2	0	Structure	1ezv	1	D	0	100	79.3	62	306	-	D	1	100	79.3	62	306	-	P07143-P07143-EXP-1ezv.pdb1-D-0-D-1.pdb
P07143	CY1_YEAST	YOR065W	P07143	CY1_YEAST	YOR065W	3	0	Structure	3cxh	1	O	0	100	79.6	62	307	-	D	0	100	79.6	62	307	-	P07143-P07143-EXP-3cxh.pdb1-O-0-D-0.pdb
P07143	CY1_YEAST	YOR065W	P07143	CY1_YEAST	YOR065W	4	0	Structure	1p84	1	D	0	100	79.6	62	307	-	D	1	100	79.6	62	307	-	P07143-P07143-EXP-1p84.pdb1-D-0-D-1.pdb
P07143	CY1_YEAST	YOR065W	P07143	CY1_YEAST	YOR065W	5	0	Structure	1kyo	1	O	0	100	79.3	62	306	-	D	0	100	79.3	62	306	-	P07143-P07143-EXP-1kyo.pdb1-O-0-D-0.pdb
P07257	QCR2_YEAST	YPR191W	P07257	QCR2_YEAST	YPR191W	1	0	Structure	3cx5	1	M	0	100	95.7	17	368	-	B	0	100	95.7	17	368	-	P07257-P07257-EXP-3cx5.pdb1-M-0-B-0.pdb
P07257	QCR2_YEAST	YPR191W	P07257	QCR2_YEAST	YPR191W	2	0	Structure	1ezv	1	B	0	100	95.7	17	368	-	B	1	100	95.7	17	368	-	P07257-P07257-EXP-1ezv.pdb1-B-0-B-1.pdb
P07257	QCR2_YEAST	YPR191W	P07257	QCR2_YEAST	YPR191W	3	0	Structure	3cxh	1	M	0	100	95.7	17	368	-	B	0	100	95.7	17	368	-	P07257-P07257-EXP-3cxh.pdb1-M-0-B-0.pdb
P07257	QCR2_YEAST	YPR191W	P07257	QCR2_YEAST	YPR191W	4	0	Structure	1p84	1	B	0	100	95.7	17	368	-	B	1	100	95.7	17	368	-	P07257-P07257-EXP-1p84.pdb1-B-0-B-1.pdb
P07257	QCR2_YEAST	YPR191W	P07257	QCR2_YEAST	YPR191W	5	0	Structure	1kyo	1	M	0	100	95.7	17	368	-	B	0	100	95.7	17	368	-	P07257-P07257-EXP-1kyo.pdb1-M-0-B-0.pdb
P32324	EF2_YEAST	YOR133W	P32324	EF2_YEAST	YOR133W	1	0	Dom_dom_model	2hcj	-	A	-	39.3	3.2	18	44	GTP_EFTU	B	-	10.7	15.6	67	343	GTP_EFTU	P32324-P32324-MDD-GTP_EFTU-GTP_EFTU-2hcj-A-9-39-B-59-201.pdb
P07149	FAS1_YEAST	YKL182W	P07149	FAS1_YEAST	YKL182W	1	0	Structure	2uv8	1	H	0	99.4	99.8	5	2050	-	I	0	99.4	99.8	5	2050	-	P07149-P07149-EXP-2uv8.pdb1-H-0-I-0.pdb
P07149	FAS1_YEAST	YKL182W	P07149	FAS1_YEAST	YKL182W	2	0	Structure	2uv8	1	H	0	99.4	99.8	5	2050	-	G	0	99.4	99.8	5	2050	-	P07149-P07149-EXP-2uv8.pdb1-H-0-G-0.pdb
P07149	FAS1_YEAST	YKL182W	P07149	FAS1_YEAST	YKL182W	3	0	Structure	2uv8	1	I	1	99.4	99.8	5	2050	-	G	1	99.4	99.8	5	2050	-	P07149-P07149-EXP-2uv8.pdb1-I-1-G-1.pdb
P07149	FAS1_YEAST	YKL182W	P07149	FAS1_YEAST	YKL182W	4	0	Structure	2uv8	1	I	0	99.4	99.8	5	2050	-	G	0	99.4	99.8	5	2050	-	P07149-P07149-EXP-2uv8.pdb1-I-0-G-0.pdb
P07149	FAS1_YEAST	YKL182W	P07149	FAS1_YEAST	YKL182W	5	0	Structure	2uv8	1	H	1	99.4	99.8	5	2050	-	I	1	99.4	99.8	5	2050	-	P07149-P07149-EXP-2uv8.pdb1-H-1-I-1.pdb
P07149	FAS1_YEAST	YKL182W	P07149	FAS1_YEAST	YKL182W	6	0	Structure	2uv8	1	H	1	99.4	99.8	5	2050	-	G	1	99.4	99.8	5	2050	-	P07149-P07149-EXP-2uv8.pdb1-H-1-G-1.pdb
P07149	FAS1_YEAST	YKL182W	P07149	FAS1_YEAST	YKL182W	7	0	Structure	3hmj	1	H	0	99.4	99.8	5	2050	-	G	0	99.4	99.8	5	2050	-	P07149-P07149-EXP-3hmj.pdb1-H-0-G-0.pdb
P07149	FAS1_YEAST	YKL182W	P07149	FAS1_YEAST	YKL182W	8	0	Structure	3hmj	1	I	0	99.4	99.8	5	2050	-	G	0	99.4	99.8	5	2050	-	P07149-P07149-EXP-3hmj.pdb1-I-0-G-0.pdb
P07149	FAS1_YEAST	YKL182W	P07149	FAS1_YEAST	YKL182W	9	0	Structure	3hmj	1	H	0	99.4	99.8	5	2050	-	I	0	99.4	99.8	5	2050	-	P07149-P07149-EXP-3hmj.pdb1-H-0-I-0.pdb
P07149	FAS1_YEAST	YKL182W	P07149	FAS1_YEAST	YKL182W	10	0	Structure	2vkz	1	I	0	99.4	99.8	5	2050	-	G	0	99.4	99.8	5	2050	-	P07149-P07149-EXP-2vkz.pdb1-I-0-G-0.pdb
P07149	FAS1_YEAST	YKL182W	P07149	FAS1_YEAST	YKL182W	11	0	Structure	2vkz	1	H	0	99.4	99.8	5	2050	-	I	0	99.4	99.8	5	2050	-	P07149-P07149-EXP-2vkz.pdb1-H-0-I-0.pdb
P07149	FAS1_YEAST	YKL182W	P07149	FAS1_YEAST	YKL182W	12	0	Structure	2vkz	1	H	0	99.4	99.8	5	2050	-	G	0	99.4	99.8	5	2050	-	P07149-P07149-EXP-2vkz.pdb1-H-0-G-0.pdb
P07149	FAS1_YEAST	YKL182W	P07149	FAS1_YEAST	YKL182W	13	0	Structure	2pff	1	H	0	42.1	94.6	1	1941	-	E	0	42.1	94.6	1	1941	-	P07149-P07149-EXP-2pff.pdb1-H-0-E-0.pdb
P07149	FAS1_YEAST	YKL182W	P07149	FAS1_YEAST	YKL182W	14	0	Structure	2pff	1	H	1	42.1	94.6	1	1941	-	E	1	42.1	94.6	1	1941	-	P07149-P07149-EXP-2pff.pdb1-H-1-E-1.pdb
P07149	FAS1_YEAST	YKL182W	P07149	FAS1_YEAST	YKL182W	15	0	Structure	2pff	1	E	1	42.1	94.6	1	1941	-	B	1	42.1	94.6	1	1941	-	P07149-P07149-EXP-2pff.pdb1-E-1-B-1.pdb
P07149	FAS1_YEAST	YKL182W	P07149	FAS1_YEAST	YKL182W	16	0	Structure	2pff	1	H	0	42.1	94.6	1	1941	-	B	0	42.1	94.6	1	1941	-	P07149-P07149-EXP-2pff.pdb1-H-0-B-0.pdb
P07149	FAS1_YEAST	YKL182W	P07149	FAS1_YEAST	YKL182W	17	0	Structure	2pff	1	E	0	42.1	94.6	1	1941	-	B	0	42.1	94.6	1	1941	-	P07149-P07149-EXP-2pff.pdb1-E-0-B-0.pdb
P07149	FAS1_YEAST	YKL182W	P07149	FAS1_YEAST	YKL182W	18	0	Structure	2pff	1	H	1	42.1	94.6	1	1941	-	B	1	42.1	94.6	1	1941	-	P07149-P07149-EXP-2pff.pdb1-H-1-B-1.pdb
P38011	GBLP_YEAST	YMR116C	P38011	GBLP_YEAST	YMR116C	1	0	Structure	3rfh	2	D	0	98.1	97.8	5	316	-	B	0	91.7	98.7	3	317	-	P38011-P38011-EXP-3rfh.pdb2-D-0-B-0.pdb
P38011	GBLP_YEAST	YMR116C	P38011	GBLP_YEAST	YMR116C	2	0	Structure	3rfh	1	C	0	92.6	97.5	6	316	-	A	0	92.1	98.7	3	317	-	P38011-P38011-EXP-3rfh.pdb1-C-0-A-0.pdb
P38011	GBLP_YEAST	YMR116C	P38011	GBLP_YEAST	YMR116C	3	0	Structure	3rfg	1	B	0	92.3	97.8	6	317	-	A	0	92.3	97.8	6	317	-	P38011-P38011-EXP-3rfg.pdb1-B-0-A-0.pdb
P07342	ILVB_YEAST	YMR108W	P07342	ILVB_YEAST	YMR108W	1	0	Structure	1t9b	1	B	0	98.7	87.8	85	687	-	A	0	96.7	87.8	85	687	-	P07342-P07342-EXP-1t9b.pdb1-B-0-A-0.pdb
P07342	ILVB_YEAST	YMR108W	P07342	ILVB_YEAST	YMR108W	2	0	Structure	1t9d	1	B	0	96.7	87.6	86	687	-	A	0	98.8	87.8	85	687	-	P07342-P07342-EXP-1t9d.pdb1-B-0-A-0.pdb
P07342	ILVB_YEAST	YMR108W	P07342	ILVB_YEAST	YMR108W	3	0	Structure	1t9d	2	D	0	98.8	87.8	85	687	-	C	0	96	87.2	89	687	-	P07342-P07342-EXP-1t9d.pdb2-D-0-C-0.pdb
P07342	ILVB_YEAST	YMR108W	P07342	ILVB_YEAST	YMR108W	4	0	Structure	1t9c	1	B	0	98.2	87.9	84	687	-	A	0	98.8	87.8	85	687	-	P07342-P07342-EXP-1t9c.pdb1-B-0-A-0.pdb
P07342	ILVB_YEAST	YMR108W	P07342	ILVB_YEAST	YMR108W	5	0	Structure	1t9a	2	A	0	98.8	87.9	84	687	-	A	3	98.8	87.9	84	687	-	P07342-P07342-EXP-1t9a.pdb2-A-0-A-3.pdb
P07342	ILVB_YEAST	YMR108W	P07342	ILVB_YEAST	YMR108W	6	0	Structure	1t9a	2	A	0	98.8	87.9	84	687	-	A	2	98.8	87.9	84	687	-	P07342-P07342-EXP-1t9a.pdb2-A-0-A-2.pdb
P07342	ILVB_YEAST	YMR108W	P07342	ILVB_YEAST	YMR108W	7	0	Structure	1t9a	2	A	1	98.8	87.9	84	687	-	A	2	98.8	87.9	84	687	-	P07342-P07342-EXP-1t9a.pdb2-A-1-A-2.pdb
P07342	ILVB_YEAST	YMR108W	P07342	ILVB_YEAST	YMR108W	8	0	Structure	1t9a	2	A	1	98.8	87.9	84	687	-	A	3	98.8	87.9	84	687	-	P07342-P07342-EXP-1t9a.pdb2-A-1-A-3.pdb
P07342	ILVB_YEAST	YMR108W	P07342	ILVB_YEAST	YMR108W	9	0	Structure	1t9a	2	B	3	98.2	87.9	84	687	-	A	0	98.8	87.9	84	687	-	P07342-P07342-EXP-1t9a.pdb2-B-3-A-0.pdb
P07342	ILVB_YEAST	YMR108W	P07342	ILVB_YEAST	YMR108W	10	0	Structure	1t9a	2	B	2	98.2	87.9	84	687	-	A	1	98.8	87.9	84	687	-	P07342-P07342-EXP-1t9a.pdb2-B-2-A-1.pdb
P07342	ILVB_YEAST	YMR108W	P07342	ILVB_YEAST	YMR108W	11	0	Structure	1t9a	2	B	0	98.2	87.9	84	687	-	A	0	98.8	87.9	84	687	-	P07342-P07342-EXP-1t9a.pdb2-B-0-A-0.pdb
P07342	ILVB_YEAST	YMR108W	P07342	ILVB_YEAST	YMR108W	12	0	Structure	1t9a	2	B	3	98.2	87.9	84	687	-	A	3	98.8	87.9	84	687	-	P07342-P07342-EXP-1t9a.pdb2-B-3-A-3.pdb
P07342	ILVB_YEAST	YMR108W	P07342	ILVB_YEAST	YMR108W	13	0	Structure	1t9a	2	B	0	98.2	87.9	84	687	-	A	2	98.8	87.9	84	687	-	P07342-P07342-EXP-1t9a.pdb2-B-0-A-2.pdb
P07342	ILVB_YEAST	YMR108W	P07342	ILVB_YEAST	YMR108W	14	0	Structure	1t9a	2	B	1	98.2	87.9	84	687	-	A	1	98.8	87.9	84	687	-	P07342-P07342-EXP-1t9a.pdb2-B-1-A-1.pdb
P07342	ILVB_YEAST	YMR108W	P07342	ILVB_YEAST	YMR108W	15	0	Structure	1t9a	2	B	2	98.2	87.9	84	687	-	A	2	98.8	87.9	84	687	-	P07342-P07342-EXP-1t9a.pdb2-B-2-A-2.pdb
P07342	ILVB_YEAST	YMR108W	P07342	ILVB_YEAST	YMR108W	16	0	Structure	1t9a	2	B	1	98.2	87.9	84	687	-	A	3	98.8	87.9	84	687	-	P07342-P07342-EXP-1t9a.pdb2-B-1-A-3.pdb
P07342	ILVB_YEAST	YMR108W	P07342	ILVB_YEAST	YMR108W	17	0	Structure	1t9a	1	B	0	98.2	87.9	84	687	-	A	0	98.8	87.9	84	687	-	P07342-P07342-EXP-1t9a.pdb1-B-0-A-0.pdb
P07342	ILVB_YEAST	YMR108W	P07342	ILVB_YEAST	YMR108W	18	0	Structure	1t9a	2	B	0	98.2	87.9	84	687	-	B	2	98.2	87.9	84	687	-	P07342-P07342-EXP-1t9a.pdb2-B-0-B-2.pdb
P07342	ILVB_YEAST	YMR108W	P07342	ILVB_YEAST	YMR108W	19	0	Structure	1t9a	2	B	0	98.2	87.9	84	687	-	B	3	98.2	87.9	84	687	-	P07342-P07342-EXP-1t9a.pdb2-B-0-B-3.pdb
P07342	ILVB_YEAST	YMR108W	P07342	ILVB_YEAST	YMR108W	20	0	Structure	1t9a	2	B	1	98.2	87.9	84	687	-	B	2	98.2	87.9	84	687	-	P07342-P07342-EXP-1t9a.pdb2-B-1-B-2.pdb
P07342	ILVB_YEAST	YMR108W	P07342	ILVB_YEAST	YMR108W	21	0	Structure	1t9a	2	B	1	98.2	87.9	84	687	-	B	3	98.2	87.9	84	687	-	P07342-P07342-EXP-1t9a.pdb2-B-1-B-3.pdb
P07342	ILVB_YEAST	YMR108W	P07342	ILVB_YEAST	YMR108W	22	0	Structure	1jsc	1	B	0	96.8	82.7	82	649	-	A	0	95.6	82.4	83	648	-	P07342-P07342-EXP-1jsc.pdb1-B-0-A-0.pdb
P07342	ILVB_YEAST	YMR108W	P07342	ILVB_YEAST	YMR108W	23	0	Structure	1n0h	1	B	0	98.8	88.1	83	687	-	A	0	99	88.1	83	687	-	P07342-P07342-EXP-1n0h.pdb1-B-0-A-0.pdb
P07259	PYR1_YEAST	YJL130C	P07259	PYR1_YEAST	YJL130C	1	0	Model	1bxr	1	G	0	42.6	46.7	435	1469	-	A	0	42.6	46.7	435	1469	-	P07259-P07259-MDL-1bxr.pdb1-G-0-A-0.pdb
P07259	PYR1_YEAST	YJL130C	P07259	PYR1_YEAST	YJL130C	2	0	Model	1bxr	1	G	0	42.6	46.7	435	1469	-	C	0	42.6	46.7	435	1469	-	P07259-P07259-MDL-1bxr.pdb1-G-0-C-0.pdb
P07259	PYR1_YEAST	YJL130C	P07259	PYR1_YEAST	YJL130C	3	0	Model	1bxr	1	E	0	42.6	46.7	435	1469	-	A	0	42.6	46.7	435	1469	-	P07259-P07259-MDL-1bxr.pdb1-E-0-A-0.pdb
P08518	RPB2_YEAST	YOR151C	P08518	RPB2_YEAST	YOR151C	1	0	Structure	1twf	2	B	0	90.6	98.6	18	1224	-	B	1	90.6	98.6	18	1224	-	P08518-P08518-EXP-1twf.pdb2-B-0-B-1.pdb
P08518	RPB2_YEAST	YOR151C	P08518	RPB2_YEAST	YOR151C	2	0	Structure	1i50	2	B	0	90.6	98.6	18	1224	-	B	1	90.6	98.6	18	1224	-	P08518-P08518-EXP-1i50.pdb2-B-0-B-1.pdb
P08518	RPB2_YEAST	YOR151C	P08518	RPB2_YEAST	YOR151C	3	0	Structure	1twg	3	B	0	90.4	98.6	18	1224	-	B	1	90.4	98.6	18	1224	-	P08518-P08518-EXP-1twg.pdb3-B-0-B-1.pdb
P08518	RPB2_YEAST	YOR151C	P08518	RPB2_YEAST	YOR151C	4	0	Structure	1twg	2	B	0	90.4	98.6	18	1224	-	B	1	90.4	98.6	18	1224	-	P08518-P08518-EXP-1twg.pdb2-B-0-B-1.pdb
P08518	RPB2_YEAST	YOR151C	P08518	RPB2_YEAST	YOR151C	5	0	Structure	1twg	2	B	2	90.4	98.6	18	1224	-	B	3	90.4	98.6	18	1224	-	P08518-P08518-EXP-1twg.pdb2-B-2-B-3.pdb
P08518	RPB2_YEAST	YOR151C	P08518	RPB2_YEAST	YOR151C	6	0	Structure	2nvy	2	B	0	90.6	98.6	18	1224	-	B	1	90.6	98.6	18	1224	-	P08518-P08518-EXP-2nvy.pdb2-B-0-B-1.pdb
P00927	THDH_YEAST	YER086W	P00927	THDH_YEAST	YER086W	1	0	Model	2gn0	1	B	0	35.6	51.4	87	382	-	A	0	35.6	51.4	87	382	-	P00927-P00927-MDL-2gn0.pdb1-B-0-A-0.pdb
P00927	THDH_YEAST	YER086W	P00927	THDH_YEAST	YER086W	2	0	Model	2gn1	1	B	0	35.6	51.4	87	382	-	A	0	35.6	51.4	87	382	-	P00927-P00927-MDL-2gn1.pdb1-B-0-A-0.pdb
P00927	THDH_YEAST	YER086W	P00927	THDH_YEAST	YER086W	3	0	Model	1tdj	1	A	0	47.3	89.1	62	574	-	A	1	47.3	89.1	62	574	-	P00927-P00927-MDL-1tdj.pdb1-A-0-A-1.pdb
P16140	VATB_YEAST	YBR127C	P16140	VATB_YEAST	YBR127C	1	0	Model	3tgw	1	B	0	57.2	88.2	34	489	-	A	0	57.9	88.2	34	489	-	P16140-P16140-MDL-3tgw.pdb1-B-0-A-0.pdb
P16140	VATB_YEAST	YBR127C	P16140	VATB_YEAST	YBR127C	2	0	Model	3tiv	1	B	0	55.5	88.2	34	489	-	A	0	57.7	87.8	36	489	-	P16140-P16140-MDL-3tiv.pdb1-B-0-A-0.pdb
P16140	VATB_YEAST	YBR127C	P16140	VATB_YEAST	YBR127C	3	0	Model	3b2q	1	B	0	56.2	87.8	36	489	-	A	0	57.2	88.2	34	489	-	P16140-P16140-MDL-3b2q.pdb1-B-0-A-0.pdb
P61829	ATP9_YEAST	Q0130	P61829	ATP9_YEAST	Q0130	1	0	Structure	4f4s	2	O	1	100	97.4	2	75	-	K	0	100	97.4	2	75	-	P61829-P61829-EXP-4f4s.pdb2-O-1-K-0.pdb
P61829	ATP9_YEAST	Q0130	P61829	ATP9_YEAST	Q0130	2	0	Structure	4f4s	1	D	0	100	97.4	2	75	-	C	0	100	97.4	2	75	-	P61829-P61829-EXP-4f4s.pdb1-D-0-C-0.pdb
P61829	ATP9_YEAST	Q0130	P61829	ATP9_YEAST	Q0130	3	0	Structure	4f4s	2	N	0	100	97.4	2	75	-	O	0	100	97.4	2	75	-	P61829-P61829-EXP-4f4s.pdb2-N-0-O-0.pdb
P61829	ATP9_YEAST	Q0130	P61829	ATP9_YEAST	Q0130	4	0	Structure	4f4s	2	N	0	100	97.4	2	75	-	M	0	100	97.4	2	75	-	P61829-P61829-EXP-4f4s.pdb2-N-0-M-0.pdb
P61829	ATP9_YEAST	Q0130	P61829	ATP9_YEAST	Q0130	5	0	Structure	4f4s	2	L	1	100	97.4	2	75	-	M	1	100	97.4	2	75	-	P61829-P61829-EXP-4f4s.pdb2-L-1-M-1.pdb
P61829	ATP9_YEAST	Q0130	P61829	ATP9_YEAST	Q0130	6	0	Structure	4f4s	2	L	0	100	97.4	2	75	-	M	0	100	97.4	2	75	-	P61829-P61829-EXP-4f4s.pdb2-L-0-M-0.pdb
P61829	ATP9_YEAST	Q0130	P61829	ATP9_YEAST	Q0130	7	0	Structure	4f4s	1	B	1	100	97.4	2	75	-	C	1	100	97.4	2	75	-	P61829-P61829-EXP-4f4s.pdb1-B-1-C-1.pdb
P61829	ATP9_YEAST	Q0130	P61829	ATP9_YEAST	Q0130	8	0	Structure	4f4s	2	L	1	100	97.4	2	75	-	K	1	100	97.4	2	75	-	P61829-P61829-EXP-4f4s.pdb2-L-1-K-1.pdb
P61829	ATP9_YEAST	Q0130	P61829	ATP9_YEAST	Q0130	9	0	Structure	4f4s	1	D	0	100	97.4	2	75	-	E	0	100	97.4	2	75	-	P61829-P61829-EXP-4f4s.pdb1-D-0-E-0.pdb
P61829	ATP9_YEAST	Q0130	P61829	ATP9_YEAST	Q0130	10	0	Structure	4f4s	1	D	1	100	97.4	2	75	-	E	1	100	97.4	2	75	-	P61829-P61829-EXP-4f4s.pdb1-D-1-E-1.pdb
P61829	ATP9_YEAST	Q0130	P61829	ATP9_YEAST	Q0130	11	0	Structure	4f4s	2	N	1	100	97.4	2	75	-	O	1	100	97.4	2	75	-	P61829-P61829-EXP-4f4s.pdb2-N-1-O-1.pdb
P61829	ATP9_YEAST	Q0130	P61829	ATP9_YEAST	Q0130	12	0	Structure	4f4s	2	O	0	100	97.4	2	75	-	K	1	100	97.4	2	75	-	P61829-P61829-EXP-4f4s.pdb2-O-0-K-1.pdb
P61829	ATP9_YEAST	Q0130	P61829	ATP9_YEAST	Q0130	13	0	Structure	4f4s	1	D	1	100	97.4	2	75	-	C	1	100	97.4	2	75	-	P61829-P61829-EXP-4f4s.pdb1-D-1-C-1.pdb
P61829	ATP9_YEAST	Q0130	P61829	ATP9_YEAST	Q0130	14	0	Structure	4f4s	2	N	1	100	97.4	2	75	-	M	1	100	97.4	2	75	-	P61829-P61829-EXP-4f4s.pdb2-N-1-M-1.pdb
P61829	ATP9_YEAST	Q0130	P61829	ATP9_YEAST	Q0130	15	0	Structure	4f4s	1	B	0	100	97.4	2	75	-	C	0	100	97.4	2	75	-	P61829-P61829-EXP-4f4s.pdb1-B-0-C-0.pdb
P61829	ATP9_YEAST	Q0130	P61829	ATP9_YEAST	Q0130	16	0	Structure	4f4s	2	L	0	100	97.4	2	75	-	K	0	100	97.4	2	75	-	P61829-P61829-EXP-4f4s.pdb2-L-0-K-0.pdb
P61829	ATP9_YEAST	Q0130	P61829	ATP9_YEAST	Q0130	17	0	Structure	4f4s	1	E	0	100	97.4	2	75	-	A	1	100	96.1	2	74	-	P61829-P61829-EXP-4f4s.pdb1-E-0-A-1.pdb
P61829	ATP9_YEAST	Q0130	P61829	ATP9_YEAST	Q0130	18	0	Structure	4f4s	1	B	0	100	97.4	2	75	-	A	0	100	96.1	2	74	-	P61829-P61829-EXP-4f4s.pdb1-B-0-A-0.pdb
P61829	ATP9_YEAST	Q0130	P61829	ATP9_YEAST	Q0130	19	0	Structure	4f4s	1	B	1	100	97.4	2	75	-	A	1	100	96.1	2	74	-	P61829-P61829-EXP-4f4s.pdb1-B-1-A-1.pdb
P61829	ATP9_YEAST	Q0130	P61829	ATP9_YEAST	Q0130	20	0	Structure	4f4s	1	E	1	100	97.4	2	75	-	A	0	100	96.1	2	74	-	P61829-P61829-EXP-4f4s.pdb1-E-1-A-0.pdb
P61829	ATP9_YEAST	Q0130	P61829	ATP9_YEAST	Q0130	21	0	Structure	3u32	1	L	0	100	97.4	2	75	-	M	0	100	97.4	2	75	-	P61829-P61829-EXP-3u32.pdb1-L-0-M-0.pdb
P61829	ATP9_YEAST	Q0130	P61829	ATP9_YEAST	Q0130	22	0	Structure	3u32	1	L	1	100	97.4	2	75	-	M	1	100	97.4	2	75	-	P61829-P61829-EXP-3u32.pdb1-L-1-M-1.pdb
P61829	ATP9_YEAST	Q0130	P61829	ATP9_YEAST	Q0130	23	0	Structure	3u32	1	N	0	100	96.1	2	74	-	M	0	100	97.4	2	75	-	P61829-P61829-EXP-3u32.pdb1-N-0-M-0.pdb
P61829	ATP9_YEAST	Q0130	P61829	ATP9_YEAST	Q0130	24	0	Structure	3u32	1	L	0	100	97.4	2	75	-	K	0	100	96.1	2	74	-	P61829-P61829-EXP-3u32.pdb1-L-0-K-0.pdb
P61829	ATP9_YEAST	Q0130	P61829	ATP9_YEAST	Q0130	25	0	Structure	3u2f	1	N	0	100	96.1	2	74	-	M	0	100	97.4	2	75	-	P61829-P61829-EXP-3u2f.pdb1-N-0-M-0.pdb
P61829	ATP9_YEAST	Q0130	P61829	ATP9_YEAST	Q0130	26	0	Structure	3ud0	1	N	0	100	96.1	2	74	-	M	0	100	97.4	2	75	-	P61829-P61829-EXP-3ud0.pdb1-N-0-M-0.pdb
P61829	ATP9_YEAST	Q0130	P61829	ATP9_YEAST	Q0130	27	0	Structure	3ud0	1	L	0	100	96.1	2	74	-	M	0	100	97.4	2	75	-	P61829-P61829-EXP-3ud0.pdb1-L-0-M-0.pdb
P61829	ATP9_YEAST	Q0130	P61829	ATP9_YEAST	Q0130	28	0	Structure	3ud0	1	N	1	100	96.1	2	74	-	M	1	100	97.4	2	75	-	P61829-P61829-EXP-3ud0.pdb1-N-1-M-1.pdb
P61829	ATP9_YEAST	Q0130	P61829	ATP9_YEAST	Q0130	29	0	Structure	3u32	1	N	1	100	96.1	2	74	-	M	1	100	97.4	2	75	-	P61829-P61829-EXP-3u32.pdb1-N-1-M-1.pdb
P61829	ATP9_YEAST	Q0130	P61829	ATP9_YEAST	Q0130	30	0	Structure	3u2f	1	L	0	100	96.1	2	74	-	M	0	100	97.4	2	75	-	P61829-P61829-EXP-3u2f.pdb1-L-0-M-0.pdb
P61829	ATP9_YEAST	Q0130	P61829	ATP9_YEAST	Q0130	31	0	Structure	3u32	1	L	1	100	97.4	2	75	-	K	1	100	96.1	2	74	-	P61829-P61829-EXP-3u32.pdb1-L-1-K-1.pdb
P61829	ATP9_YEAST	Q0130	P61829	ATP9_YEAST	Q0130	32	0	Structure	3u2f	1	N	1	100	96.1	2	74	-	M	1	100	97.4	2	75	-	P61829-P61829-EXP-3u2f.pdb1-N-1-M-1.pdb
P61829	ATP9_YEAST	Q0130	P61829	ATP9_YEAST	Q0130	33	0	Structure	3u2f	1	L	1	100	96.1	2	74	-	M	1	100	97.4	2	75	-	P61829-P61829-EXP-3u2f.pdb1-L-1-M-1.pdb
P61829	ATP9_YEAST	Q0130	P61829	ATP9_YEAST	Q0130	34	0	Structure	3ud0	1	L	1	100	96.1	2	74	-	M	1	100	97.4	2	75	-	P61829-P61829-EXP-3ud0.pdb1-L-1-M-1.pdb
P61829	ATP9_YEAST	Q0130	P61829	ATP9_YEAST	Q0130	35	0	Structure	3u32	1	O	1	100	96.1	2	74	-	K	0	100	96.1	2	74	-	P61829-P61829-EXP-3u32.pdb1-O-1-K-0.pdb
P61829	ATP9_YEAST	Q0130	P61829	ATP9_YEAST	Q0130	36	0	Structure	3u32	1	O	0	100	96.1	2	74	-	K	1	100	96.1	2	74	-	P61829-P61829-EXP-3u32.pdb1-O-0-K-1.pdb
P61829	ATP9_YEAST	Q0130	P61829	ATP9_YEAST	Q0130	37	0	Structure	3u32	1	N	1	100	96.1	2	74	-	O	1	100	96.1	2	74	-	P61829-P61829-EXP-3u32.pdb1-N-1-O-1.pdb
P61829	ATP9_YEAST	Q0130	P61829	ATP9_YEAST	Q0130	38	0	Structure	3u2f	1	N	1	100	96.1	2	74	-	O	1	100	96.1	2	74	-	P61829-P61829-EXP-3u2f.pdb1-N-1-O-1.pdb
P61829	ATP9_YEAST	Q0130	P61829	ATP9_YEAST	Q0130	39	0	Structure	3u2f	1	O	1	100	96.1	2	74	-	K	0	100	96.1	2	74	-	P61829-P61829-EXP-3u2f.pdb1-O-1-K-0.pdb
P61829	ATP9_YEAST	Q0130	P61829	ATP9_YEAST	Q0130	40	0	Structure	3u2f	1	L	0	100	96.1	2	74	-	K	0	100	96.1	2	74	-	P61829-P61829-EXP-3u2f.pdb1-L-0-K-0.pdb
P61829	ATP9_YEAST	Q0130	P61829	ATP9_YEAST	Q0130	41	0	Structure	3ud0	1	N	0	100	96.1	2	74	-	O	0	100	96.1	2	74	-	P61829-P61829-EXP-3ud0.pdb1-N-0-O-0.pdb
P61829	ATP9_YEAST	Q0130	P61829	ATP9_YEAST	Q0130	42	0	Structure	3ud0	1	O	1	100	96.1	2	74	-	K	0	100	96.1	2	74	-	P61829-P61829-EXP-3ud0.pdb1-O-1-K-0.pdb
P61829	ATP9_YEAST	Q0130	P61829	ATP9_YEAST	Q0130	43	0	Structure	3ud0	1	N	1	100	96.1	2	74	-	O	1	100	96.1	2	74	-	P61829-P61829-EXP-3ud0.pdb1-N-1-O-1.pdb
P61829	ATP9_YEAST	Q0130	P61829	ATP9_YEAST	Q0130	44	0	Structure	3ud0	1	L	1	100	96.1	2	74	-	K	1	100	96.1	2	74	-	P61829-P61829-EXP-3ud0.pdb1-L-1-K-1.pdb
P61829	ATP9_YEAST	Q0130	P61829	ATP9_YEAST	Q0130	45	0	Structure	3u2f	1	L	1	100	96.1	2	74	-	K	1	100	96.1	2	74	-	P61829-P61829-EXP-3u2f.pdb1-L-1-K-1.pdb
P61829	ATP9_YEAST	Q0130	P61829	ATP9_YEAST	Q0130	46	0	Structure	3ud0	1	L	0	100	96.1	2	74	-	K	0	100	96.1	2	74	-	P61829-P61829-EXP-3ud0.pdb1-L-0-K-0.pdb
P61829	ATP9_YEAST	Q0130	P61829	ATP9_YEAST	Q0130	47	0	Structure	3u2f	1	N	0	100	96.1	2	74	-	O	0	100	96.1	2	74	-	P61829-P61829-EXP-3u2f.pdb1-N-0-O-0.pdb
P61829	ATP9_YEAST	Q0130	P61829	ATP9_YEAST	Q0130	48	0	Structure	3ud0	1	O	0	100	96.1	2	74	-	K	1	100	96.1	2	74	-	P61829-P61829-EXP-3ud0.pdb1-O-0-K-1.pdb
P61829	ATP9_YEAST	Q0130	P61829	ATP9_YEAST	Q0130	49	0	Structure	3u2f	1	O	0	100	96.1	2	74	-	K	1	100	96.1	2	74	-	P61829-P61829-EXP-3u2f.pdb1-O-0-K-1.pdb
P61829	ATP9_YEAST	Q0130	P61829	ATP9_YEAST	Q0130	50	0	Structure	3u32	1	N	0	100	96.1	2	74	-	O	0	100	96.1	2	74	-	P61829-P61829-EXP-3u32.pdb1-N-0-O-0.pdb
P61829	ATP9_YEAST	Q0130	P61829	ATP9_YEAST	Q0130	51	0	Structure	3u2y	1	N	0	100	97.4	2	75	-	M	0	100	97.4	2	75	-	P61829-P61829-EXP-3u2y.pdb1-N-0-M-0.pdb
P61829	ATP9_YEAST	Q0130	P61829	ATP9_YEAST	Q0130	52	0	Structure	3u2y	1	N	1	100	97.4	2	75	-	M	1	100	97.4	2	75	-	P61829-P61829-EXP-3u2y.pdb1-N-1-M-1.pdb
P61829	ATP9_YEAST	Q0130	P61829	ATP9_YEAST	Q0130	53	0	Structure	3u2y	1	L	1	100	97.4	2	75	-	M	1	100	97.4	2	75	-	P61829-P61829-EXP-3u2y.pdb1-L-1-M-1.pdb
P61829	ATP9_YEAST	Q0130	P61829	ATP9_YEAST	Q0130	54	0	Structure	3u2y	1	L	0	100	97.4	2	75	-	M	0	100	97.4	2	75	-	P61829-P61829-EXP-3u2y.pdb1-L-0-M-0.pdb
P61829	ATP9_YEAST	Q0130	P61829	ATP9_YEAST	Q0130	55	0	Structure	3u2y	1	L	1	100	97.4	2	75	-	K	1	100	96.1	2	74	-	P61829-P61829-EXP-3u2y.pdb1-L-1-K-1.pdb
P61829	ATP9_YEAST	Q0130	P61829	ATP9_YEAST	Q0130	56	0	Structure	3u2y	1	N	1	100	97.4	2	75	-	O	1	100	96.1	2	74	-	P61829-P61829-EXP-3u2y.pdb1-N-1-O-1.pdb
P61829	ATP9_YEAST	Q0130	P61829	ATP9_YEAST	Q0130	57	0	Structure	3u2y	1	L	0	100	97.4	2	75	-	K	0	100	96.1	2	74	-	P61829-P61829-EXP-3u2y.pdb1-L-0-K-0.pdb
P61829	ATP9_YEAST	Q0130	P61829	ATP9_YEAST	Q0130	58	0	Structure	3u2y	1	N	0	100	97.4	2	75	-	O	0	100	96.1	2	74	-	P61829-P61829-EXP-3u2y.pdb1-N-0-O-0.pdb
P61829	ATP9_YEAST	Q0130	P61829	ATP9_YEAST	Q0130	59	0	Structure	3u2y	1	O	1	100	96.1	2	74	-	K	0	100	96.1	2	74	-	P61829-P61829-EXP-3u2y.pdb1-O-1-K-0.pdb
P61829	ATP9_YEAST	Q0130	P61829	ATP9_YEAST	Q0130	60	0	Structure	3u2y	1	O	0	100	96.1	2	74	-	K	1	100	96.1	2	74	-	P61829-P61829-EXP-3u2y.pdb1-O-0-K-1.pdb
P61829	ATP9_YEAST	Q0130	P61829	ATP9_YEAST	Q0130	61	0	Structure	2xok	1	P	0	100	98.7	1	75	-	Q	0	100	98.7	1	75	-	P61829-P61829-EXP-2xok.pdb1-P-0-Q-0.pdb
P61829	ATP9_YEAST	Q0130	P61829	ATP9_YEAST	Q0130	62	0	Structure	2xok	1	R	0	100	97.4	1	74	-	Q	0	100	98.7	1	75	-	P61829-P61829-EXP-2xok.pdb1-R-0-Q-0.pdb
P61829	ATP9_YEAST	Q0130	P61829	ATP9_YEAST	Q0130	63	0	Structure	2xok	1	P	0	100	98.7	1	75	-	O	0	100	97.4	1	74	-	P61829-P61829-EXP-2xok.pdb1-P-0-O-0.pdb
P61829	ATP9_YEAST	Q0130	P61829	ATP9_YEAST	Q0130	64	0	Structure	2xok	1	R	0	100	97.4	1	74	-	S	0	100	97.4	1	74	-	P61829-P61829-EXP-2xok.pdb1-R-0-S-0.pdb
P61829	ATP9_YEAST	Q0130	P61829	ATP9_YEAST	Q0130	65	0	Structure	2xok	1	T	0	100	96.1	2	74	-	S	0	100	97.4	1	74	-	P61829-P61829-EXP-2xok.pdb1-T-0-S-0.pdb
P61829	ATP9_YEAST	Q0130	P61829	ATP9_YEAST	Q0130	66	0	Structure	2xok	1	N	0	100	96.1	1	73	-	O	0	100	97.4	1	74	-	P61829-P61829-EXP-2xok.pdb1-N-0-O-0.pdb
P61829	ATP9_YEAST	Q0130	P61829	ATP9_YEAST	Q0130	67	0	Structure	2xok	1	T	0	100	96.1	2	74	-	K	0	100	96.1	3	75	-	P61829-P61829-EXP-2xok.pdb1-T-0-K-0.pdb
P61829	ATP9_YEAST	Q0130	P61829	ATP9_YEAST	Q0130	68	0	Structure	2xok	1	N	0	100	96.1	1	73	-	M	0	100	96.1	1	73	-	P61829-P61829-EXP-2xok.pdb1-N-0-M-0.pdb
P61829	ATP9_YEAST	Q0130	P61829	ATP9_YEAST	Q0130	69	0	Structure	2xok	1	L	0	100	94.7	2	73	-	M	0	100	96.1	1	73	-	P61829-P61829-EXP-2xok.pdb1-L-0-M-0.pdb
P61829	ATP9_YEAST	Q0130	P61829	ATP9_YEAST	Q0130	70	0	Structure	2xok	1	L	0	100	94.7	2	73	-	K	0	100	96.1	3	75	-	P61829-P61829-EXP-2xok.pdb1-L-0-K-0.pdb
P61829	ATP9_YEAST	Q0130	P61829	ATP9_YEAST	Q0130	71	0	Structure	2wpd	1	P	0	100	100	1	76	-	O	0	100	100	1	76	-	P61829-P61829-EXP-2wpd.pdb1-P-0-O-0.pdb
P61829	ATP9_YEAST	Q0130	P61829	ATP9_YEAST	Q0130	72	0	Structure	2wpd	1	J	0	100	100	1	76	-	K	0	100	100	1	76	-	P61829-P61829-EXP-2wpd.pdb1-J-0-K-0.pdb
P61829	ATP9_YEAST	Q0130	P61829	ATP9_YEAST	Q0130	73	0	Structure	2wpd	1	L	0	100	100	1	76	-	M	0	100	100	1	76	-	P61829-P61829-EXP-2wpd.pdb1-L-0-M-0.pdb
P61829	ATP9_YEAST	Q0130	P61829	ATP9_YEAST	Q0130	74	0	Structure	2wpd	1	P	0	100	100	1	76	-	Q	0	100	100	1	76	-	P61829-P61829-EXP-2wpd.pdb1-P-0-Q-0.pdb
P61829	ATP9_YEAST	Q0130	P61829	ATP9_YEAST	Q0130	75	0	Structure	2wpd	1	L	0	100	100	1	76	-	K	0	100	100	1	76	-	P61829-P61829-EXP-2wpd.pdb1-L-0-K-0.pdb
P61829	ATP9_YEAST	Q0130	P61829	ATP9_YEAST	Q0130	76	0	Structure	2wpd	1	R	0	100	100	1	76	-	Q	0	100	100	1	76	-	P61829-P61829-EXP-2wpd.pdb1-R-0-Q-0.pdb
P61829	ATP9_YEAST	Q0130	P61829	ATP9_YEAST	Q0130	77	0	Structure	2wpd	1	S	0	100	100	1	76	-	J	0	100	100	1	76	-	P61829-P61829-EXP-2wpd.pdb1-S-0-J-0.pdb
P61829	ATP9_YEAST	Q0130	P61829	ATP9_YEAST	Q0130	78	0	Structure	2wpd	1	N	0	100	100	1	76	-	M	0	100	100	1	76	-	P61829-P61829-EXP-2wpd.pdb1-N-0-M-0.pdb
P61829	ATP9_YEAST	Q0130	P61829	ATP9_YEAST	Q0130	79	0	Structure	2wpd	1	N	0	100	100	1	76	-	O	0	100	100	1	76	-	P61829-P61829-EXP-2wpd.pdb1-N-0-O-0.pdb
P61829	ATP9_YEAST	Q0130	P61829	ATP9_YEAST	Q0130	80	0	Structure	2wpd	1	R	0	100	100	1	76	-	S	0	100	100	1	76	-	P61829-P61829-EXP-2wpd.pdb1-R-0-S-0.pdb
P61829	ATP9_YEAST	Q0130	P61829	ATP9_YEAST	Q0130	81	0	Structure	3zry	2	P	0	100	98.7	1	75	-	Q	0	100	98.7	1	75	-	P61829-P61829-EXP-3zry.pdb2-P-0-Q-0.pdb
P61829	ATP9_YEAST	Q0130	P61829	ATP9_YEAST	Q0130	82	0	Structure	3zry	2	P	0	100	98.7	1	75	-	O	0	100	97.4	1	74	-	P61829-P61829-EXP-3zry.pdb2-P-0-O-0.pdb
P61829	ATP9_YEAST	Q0130	P61829	ATP9_YEAST	Q0130	83	0	Structure	3zry	2	R	0	100	97.4	1	74	-	Q	0	100	98.7	1	75	-	P61829-P61829-EXP-3zry.pdb2-R-0-Q-0.pdb
P61829	ATP9_YEAST	Q0130	P61829	ATP9_YEAST	Q0130	84	0	Structure	3zry	2	R	0	100	97.4	1	74	-	S	0	100	97.4	1	74	-	P61829-P61829-EXP-3zry.pdb2-R-0-S-0.pdb
P61829	ATP9_YEAST	Q0130	P61829	ATP9_YEAST	Q0130	85	0	Structure	3zry	2	N	0	100	96.1	1	73	-	O	0	100	97.4	1	74	-	P61829-P61829-EXP-3zry.pdb2-N-0-O-0.pdb
P61829	ATP9_YEAST	Q0130	P61829	ATP9_YEAST	Q0130	86	0	Structure	3zry	2	S	0	100	97.4	1	74	-	J	0	100	96.1	2	74	-	P61829-P61829-EXP-3zry.pdb2-S-0-J-0.pdb
P61829	ATP9_YEAST	Q0130	P61829	ATP9_YEAST	Q0130	87	0	Structure	3zry	2	J	0	100	96.1	2	74	-	K	0	100	96.1	3	75	-	P61829-P61829-EXP-3zry.pdb2-J-0-K-0.pdb
P61829	ATP9_YEAST	Q0130	P61829	ATP9_YEAST	Q0130	88	0	Structure	3zry	2	N	0	100	96.1	1	73	-	M	0	100	96.1	1	73	-	P61829-P61829-EXP-3zry.pdb2-N-0-M-0.pdb
P61829	ATP9_YEAST	Q0130	P61829	ATP9_YEAST	Q0130	89	0	Structure	3zry	2	L	0	100	94.7	2	73	-	M	0	100	96.1	1	73	-	P61829-P61829-EXP-3zry.pdb2-L-0-M-0.pdb
P61829	ATP9_YEAST	Q0130	P61829	ATP9_YEAST	Q0130	90	0	Structure	3zry	2	L	0	100	94.7	2	73	-	K	0	100	96.1	3	75	-	P61829-P61829-EXP-3zry.pdb2-L-0-K-0.pdb
P61829	ATP9_YEAST	Q0130	P61829	ATP9_YEAST	Q0130	91	0	Structure	4b2q	1	J	0	100	100	1	76	-	K	0	100	100	1	76	-	P61829-P61829-EXP-4b2q.pdb1-J-0-K-0.pdb
P61829	ATP9_YEAST	Q0130	P61829	ATP9_YEAST	Q0130	92	0	Structure	4b2q	1	s	0	100	100	1	76	-	j	0	100	100	1	76	-	P61829-P61829-EXP-4b2q.pdb1-s-0-j-0.pdb
P61829	ATP9_YEAST	Q0130	P61829	ATP9_YEAST	Q0130	93	0	Structure	4b2q	1	n	0	100	100	1	76	-	o	0	100	100	1	76	-	P61829-P61829-EXP-4b2q.pdb1-n-0-o-0.pdb
P61829	ATP9_YEAST	Q0130	P61829	ATP9_YEAST	Q0130	94	0	Structure	4b2q	1	L	0	100	100	1	76	-	M	0	100	100	1	76	-	P61829-P61829-EXP-4b2q.pdb1-L-0-M-0.pdb
P61829	ATP9_YEAST	Q0130	P61829	ATP9_YEAST	Q0130	95	0	Structure	4b2q	1	S	0	100	100	1	76	-	J	0	100	100	1	76	-	P61829-P61829-EXP-4b2q.pdb1-S-0-J-0.pdb
P61829	ATP9_YEAST	Q0130	P61829	ATP9_YEAST	Q0130	96	0	Structure	4b2q	1	r	0	100	100	1	76	-	q	0	100	100	1	76	-	P61829-P61829-EXP-4b2q.pdb1-r-0-q-0.pdb
P61829	ATP9_YEAST	Q0130	P61829	ATP9_YEAST	Q0130	97	0	Structure	4b2q	1	R	0	100	100	1	76	-	Q	0	100	100	1	76	-	P61829-P61829-EXP-4b2q.pdb1-R-0-Q-0.pdb
P61829	ATP9_YEAST	Q0130	P61829	ATP9_YEAST	Q0130	98	0	Structure	4b2q	1	N	0	100	100	1	76	-	M	0	100	100	1	76	-	P61829-P61829-EXP-4b2q.pdb1-N-0-M-0.pdb
P61829	ATP9_YEAST	Q0130	P61829	ATP9_YEAST	Q0130	99	0	Structure	4b2q	1	l	0	100	100	1	76	-	m	0	100	100	1	76	-	P61829-P61829-EXP-4b2q.pdb1-l-0-m-0.pdb
P61829	ATP9_YEAST	Q0130	P61829	ATP9_YEAST	Q0130	100	0	Structure	4b2q	1	j	0	100	100	1	76	-	k	0	100	100	1	76	-	P61829-P61829-EXP-4b2q.pdb1-j-0-k-0.pdb
P61829	ATP9_YEAST	Q0130	P61829	ATP9_YEAST	Q0130	101	0	Structure	4b2q	1	P	0	100	100	1	76	-	Q	0	100	100	1	76	-	P61829-P61829-EXP-4b2q.pdb1-P-0-Q-0.pdb
P61829	ATP9_YEAST	Q0130	P61829	ATP9_YEAST	Q0130	102	0	Structure	4b2q	1	P	0	100	100	1	76	-	O	0	100	100	1	76	-	P61829-P61829-EXP-4b2q.pdb1-P-0-O-0.pdb
P61829	ATP9_YEAST	Q0130	P61829	ATP9_YEAST	Q0130	103	0	Structure	4b2q	1	N	0	100	100	1	76	-	O	0	100	100	1	76	-	P61829-P61829-EXP-4b2q.pdb1-N-0-O-0.pdb
P61829	ATP9_YEAST	Q0130	P61829	ATP9_YEAST	Q0130	104	0	Structure	4b2q	1	l	0	100	100	1	76	-	k	0	100	100	1	76	-	P61829-P61829-EXP-4b2q.pdb1-l-0-k-0.pdb
P61829	ATP9_YEAST	Q0130	P61829	ATP9_YEAST	Q0130	105	0	Structure	4b2q	1	p	0	100	100	1	76	-	o	0	100	100	1	76	-	P61829-P61829-EXP-4b2q.pdb1-p-0-o-0.pdb
P61829	ATP9_YEAST	Q0130	P61829	ATP9_YEAST	Q0130	106	0	Structure	4b2q	1	R	0	100	100	1	76	-	S	0	100	100	1	76	-	P61829-P61829-EXP-4b2q.pdb1-R-0-S-0.pdb
P61829	ATP9_YEAST	Q0130	P61829	ATP9_YEAST	Q0130	107	0	Structure	4b2q	1	L	0	100	100	1	76	-	K	0	100	100	1	76	-	P61829-P61829-EXP-4b2q.pdb1-L-0-K-0.pdb
P61829	ATP9_YEAST	Q0130	P61829	ATP9_YEAST	Q0130	108	0	Structure	4b2q	1	r	0	100	100	1	76	-	s	0	100	100	1	76	-	P61829-P61829-EXP-4b2q.pdb1-r-0-s-0.pdb
P61829	ATP9_YEAST	Q0130	P61829	ATP9_YEAST	Q0130	109	0	Structure	4b2q	1	p	0	100	100	1	76	-	q	0	100	100	1	76	-	P61829-P61829-EXP-4b2q.pdb1-p-0-q-0.pdb
P61829	ATP9_YEAST	Q0130	P61829	ATP9_YEAST	Q0130	110	0	Structure	4b2q	1	n	0	100	100	1	76	-	m	0	100	100	1	76	-	P61829-P61829-EXP-4b2q.pdb1-n-0-m-0.pdb
P40513	MAM33_YEAST	YIL070C	P40513	MAM33_YEAST	YIL070C	1	0	Structure	3qv0	1	A	0	82.1	82	49	266	-	A	2	82.1	82	49	266	-	P40513-P40513-EXP-3qv0.pdb1-A-0-A-2.pdb
P40513	MAM33_YEAST	YIL070C	P40513	MAM33_YEAST	YIL070C	2	0	Structure	3qv0	1	A	1	82.1	82	49	266	-	A	2	82.1	82	49	266	-	P40513-P40513-EXP-3qv0.pdb1-A-1-A-2.pdb
P40513	MAM33_YEAST	YIL070C	P40513	MAM33_YEAST	YIL070C	3	0	Structure	3qv0	1	A	0	82.1	82	49	266	-	A	1	82.1	82	49	266	-	P40513-P40513-EXP-3qv0.pdb1-A-0-A-1.pdb
P20967	ODO1_YEAST	YIL125W	P20967	ODO1_YEAST	YIL125W	1	0	Dom_dom_model	1um9	-	B	-	17.3	17.2	646	855	Transket_pyr	C	-	11.7	28.7	253	572	E1_dh	P20967-P20967-MDD-Transket_pyr-E1_dh-1um9-B-2-180-C-42-342.pdb
P36775	LONM_YEAST	YBL022C	P39925	AFG3_YEAST	YER017C	1	0	Dom_dom_model	1s3s	-	F	-	18.4	10.4	628	766	AAA	A	-	42.2	16.8	325	458	AAA	P36775-P39925-MDD-AAA-AAA-1s3s-F-241-371-A-241-371.pdb
P39925	AFG3_YEAST	YER017C	P40341	YTA12_YEAST	YMR089C	1	0	Model	2dhr	1	C	0	48.5	59.4	284	735	-	E	0	51.7	52.7	344	778	-	P39925-P40341-MDL-2dhr.pdb1-C-0-E-0.pdb
P39925	AFG3_YEAST	YER017C	P40341	YTA12_YEAST	YMR089C	2	0	Model	2dhr	1	E	0	48.5	59.4	284	735	-	A	0	51.7	52.7	344	778	-	P39925-P40341-MDL-2dhr.pdb1-E-0-A-0.pdb
P39925	AFG3_YEAST	YER017C	P40341	YTA12_YEAST	YMR089C	3	0	Model	2dhr	1	A	0	48.5	59.4	284	735	-	C	0	51.7	52.7	344	778	-	P39925-P40341-MDL-2dhr.pdb1-A-0-C-0.pdb
P36775	LONM_YEAST	YBL022C	P40341	YTA12_YEAST	YMR089C	1	0	Dom_dom_model	1s3s	-	F	-	18.4	10.4	628	766	AAA	A	-	42.5	15.5	385	517	AAA	P36775-P40341-MDD-AAA-AAA-1s3s-F-241-371-A-241-371.pdb
P40961	PHB1_YEAST	YGR132C	P50085	PHB2_YEAST	YGR231C	1	0	Dom_dom_model	4fvf	-	B	-	19.3	40.4	65	182	Band_7	A	-	15.4	36.8	94	209	Band_7	P40961-P50085-MDD-Band_7-Band_7-4fvf-B-89-205-A-88-202.pdb
P39925	AFG3_YEAST	YER017C	P39925	AFG3_YEAST	YER017C	1	0	Model	2dhr	1	E	0	48.5	59.4	284	735	-	A	0	48.5	59.4	284	735	-	P39925-P39925-MDL-2dhr.pdb1-E-0-A-0.pdb
P39925	AFG3_YEAST	YER017C	P39925	AFG3_YEAST	YER017C	2	0	Model	2dhr	1	E	0	48.5	59.4	284	735	-	C	0	48.5	59.4	284	735	-	P39925-P39925-MDL-2dhr.pdb1-E-0-C-0.pdb
P39925	AFG3_YEAST	YER017C	P39925	AFG3_YEAST	YER017C	3	0	Model	2dhr	1	C	0	48.5	59.4	284	735	-	A	0	48.5	59.4	284	735	-	P39925-P39925-MDL-2dhr.pdb1-C-0-A-0.pdb
P36775	LONM_YEAST	YBL022C	P36775	LONM_YEAST	YBL022C	1	0	Model	2x36	2	D	0	51.1	16.2	924	1107	-	C	0	51.8	16.9	919	1109	-	P36775-P36775-MDL-2x36.pdb2-D-0-C-0.pdb
P36775	LONM_YEAST	YBL022C	P36775	LONM_YEAST	YBL022C	2	0	Model	2x36	2	F	0	51.1	16.2	924	1107	-	C	0	51.8	16.9	919	1109	-	P36775-P36775-MDL-2x36.pdb2-F-0-C-0.pdb
P36775	LONM_YEAST	YBL022C	P36775	LONM_YEAST	YBL022C	3	0	Model	3m6a	1	E	0	38.4	51	527	1104	-	C	0	38.4	51	527	1104	-	P36775-P36775-MDL-3m6a.pdb1-E-0-C-0.pdb
P50085	PHB2_YEAST	YGR231C	P50085	PHB2_YEAST	YGR231C	1	0	Dom_dom_model	4fvf	-	A	-	15.4	36.8	94	209	Band_7	B	-	15.1	37.4	94	211	Band_7	P50085-P50085-MDD-Band_7-Band_7-4fvf-A-88-202-B-89-205.pdb
P40341	YTA12_YEAST	YMR089C	P40341	YTA12_YEAST	YMR089C	1	0	Model	2dhr	1	E	0	51.7	52.7	344	778	-	A	0	51.7	52.7	344	778	-	P40341-P40341-MDL-2dhr.pdb1-E-0-A-0.pdb
P40341	YTA12_YEAST	YMR089C	P40341	YTA12_YEAST	YMR089C	2	0	Model	2dhr	1	E	0	51.7	52.7	344	778	-	C	0	51.7	52.7	344	778	-	P40341-P40341-MDL-2dhr.pdb1-E-0-C-0.pdb
P40341	YTA12_YEAST	YMR089C	P40341	YTA12_YEAST	YMR089C	3	0	Model	2dhr	1	C	0	51.7	52.7	344	778	-	A	0	51.7	52.7	344	778	-	P40341-P40341-MDL-2dhr.pdb1-C-0-A-0.pdb
Q07540	FRDA_YEAST	YDL120W	Q07540	FRDA_YEAST	YDL120W	1	0	Structure	3oeq	1	A	0	99.2	69.5	52	172	-	A	2	99.2	69.5	52	172	-	Q07540-Q07540-EXP-3oeq.pdb1-A-0-A-2.pdb
Q07540	FRDA_YEAST	YDL120W	Q07540	FRDA_YEAST	YDL120W	2	0	Structure	3oeq	1	A	0	99.2	69.5	52	172	-	A	1	99.2	69.5	52	172	-	Q07540-Q07540-EXP-3oeq.pdb1-A-0-A-1.pdb
Q07540	FRDA_YEAST	YDL120W	Q07540	FRDA_YEAST	YDL120W	3	0	Structure	3oeq	1	A	1	99.2	69.5	52	172	-	A	2	99.2	69.5	52	172	-	Q07540-Q07540-EXP-3oeq.pdb1-A-1-A-2.pdb
Q07540	FRDA_YEAST	YDL120W	Q07540	FRDA_YEAST	YDL120W	4	0	Structure	4ec2	1	A	0	99.1	64.4	61	172	-	A	1	99.1	64.4	61	172	-	Q07540-Q07540-EXP-4ec2.pdb1-A-0-A-1.pdb
Q07540	FRDA_YEAST	YDL120W	Q07540	FRDA_YEAST	YDL120W	5	0	Structure	4ec2	1	A	1	99.1	64.4	61	172	-	A	2	99.1	64.4	61	172	-	Q07540-Q07540-EXP-4ec2.pdb1-A-1-A-2.pdb
Q07540	FRDA_YEAST	YDL120W	Q07540	FRDA_YEAST	YDL120W	6	0	Structure	4ec2	1	A	0	99.1	64.4	61	172	-	A	2	99.1	64.4	61	172	-	Q07540-Q07540-EXP-4ec2.pdb1-A-0-A-2.pdb
Q07540	FRDA_YEAST	YDL120W	Q07540	FRDA_YEAST	YDL120W	7	0	Structure	2fql	1	A	0	99.1	64.4	61	172	-	A	1	99.1	64.4	61	172	-	Q07540-Q07540-EXP-2fql.pdb1-A-0-A-1.pdb
Q07540	FRDA_YEAST	YDL120W	Q07540	FRDA_YEAST	YDL120W	8	0	Structure	2fql	1	A	0	99.1	64.4	61	172	-	A	2	99.1	64.4	61	172	-	Q07540-Q07540-EXP-2fql.pdb1-A-0-A-2.pdb
Q07540	FRDA_YEAST	YDL120W	Q07540	FRDA_YEAST	YDL120W	9	0	Structure	2fql	1	A	1	99.1	64.4	61	172	-	A	2	99.1	64.4	61	172	-	Q07540-Q07540-EXP-2fql.pdb1-A-1-A-2.pdb
Q07540	FRDA_YEAST	YDL120W	Q07540	FRDA_YEAST	YDL120W	10	0	Structure	3oer	1	A	1	99.1	64.4	61	172	-	A	2	99.1	64.4	61	172	-	Q07540-Q07540-EXP-3oer.pdb1-A-1-A-2.pdb
Q07540	FRDA_YEAST	YDL120W	Q07540	FRDA_YEAST	YDL120W	11	0	Structure	3oer	1	A	0	99.1	64.4	61	172	-	A	2	99.1	64.4	61	172	-	Q07540-Q07540-EXP-3oer.pdb1-A-0-A-2.pdb
Q07540	FRDA_YEAST	YDL120W	Q07540	FRDA_YEAST	YDL120W	12	0	Structure	3oer	1	A	0	99.1	64.4	61	172	-	A	1	99.1	64.4	61	172	-	Q07540-Q07540-EXP-3oer.pdb1-A-0-A-1.pdb
Q02784	GLRX5_YEAST	YPL059W	Q02784	GLRX5_YEAST	YPL059W	1	0	Model	2wul	1	D	0	54.5	66.7	40	139	-	A	0	54.5	66.7	40	139	-	Q02784-Q02784-MDL-2wul.pdb1-D-0-A-0.pdb
Q02784	GLRX5_YEAST	YPL059W	Q02784	GLRX5_YEAST	YPL059W	2	0	Model	2wul	1	B	0	54.5	66.7	40	139	-	C	0	54.5	66.7	40	139	-	Q02784-Q02784-MDL-2wul.pdb1-B-0-C-0.pdb
Q02784	GLRX5_YEAST	YPL059W	Q02784	GLRX5_YEAST	YPL059W	3	0	Model	2wul	1	D	0	54.5	66.7	40	139	-	C	0	54.5	66.7	40	139	-	Q02784-Q02784-MDL-2wul.pdb1-D-0-C-0.pdb
P43582	WWM1_YEAST	YFL010C	P43582	WWM1_YEAST	YFL010C	1	0	Dom_dom_model	2nnt	-	A	-	23.1	11.4	14	38	WW	B	-	23.1	11.4	14	38	WW	P43582-P43582-MDD-WW-WW-2nnt-A-204-230-B-304-330.pdb
P16861	K6PF1_YEAST	YGR240C	P16862	K6PF2_YEAST	YMR205C	1	0	Structure	3o8o	2	E	0	96.7	78.8	203	980	-	H	0	100	79.6	195	957	-	P16861-P16862-EXP-3o8o.pdb2-E-0-H-0.pdb
P16861	K6PF1_YEAST	YGR240C	P16862	K6PF2_YEAST	YMR205C	2	0	Structure	3o8o	2	E	0	96.7	78.8	203	980	-	F	0	100	79.5	196	957	-	P16861-P16862-EXP-3o8o.pdb2-E-0-F-0.pdb
P16861	K6PF1_YEAST	YGR240C	P16862	K6PF2_YEAST	YMR205C	3	0	Structure	3o8o	1	A	0	96.6	78.6	205	980	-	B	0	100	79.6	195	957	-	P16861-P16862-EXP-3o8o.pdb1-A-0-B-0.pdb
P16861	K6PF1_YEAST	YGR240C	P16862	K6PF2_YEAST	YMR205C	4	0	Structure	3o8o	1	A	0	96.6	78.6	205	980	-	D	0	100	79.6	195	957	-	P16861-P16862-EXP-3o8o.pdb1-A-0-D-0.pdb
P16861	K6PF1_YEAST	YGR240C	P16862	K6PF2_YEAST	YMR205C	5	0	Structure	3o8o	1	C	0	96.6	78.6	205	980	-	B	0	100	79.6	195	957	-	P16861-P16862-EXP-3o8o.pdb1-C-0-B-0.pdb
P16861	K6PF1_YEAST	YGR240C	P16862	K6PF2_YEAST	YMR205C	6	0	Structure	3o8o	1	C	0	96.6	78.6	205	980	-	D	0	100	79.6	195	957	-	P16861-P16862-EXP-3o8o.pdb1-C-0-D-0.pdb
P16861	K6PF1_YEAST	YGR240C	P16862	K6PF2_YEAST	YMR205C	7	0	Structure	3o8o	2	G	0	96.6	78.2	205	976	-	H	0	100	79.6	195	957	-	P16861-P16862-EXP-3o8o.pdb2-G-0-H-0.pdb
P16861	K6PF1_YEAST	YGR240C	P16862	K6PF2_YEAST	YMR205C	8	0	Structure	3o8o	2	G	0	96.6	78.2	205	976	-	F	0	100	79.5	196	957	-	P16861-P16862-EXP-3o8o.pdb2-G-0-F-0.pdb
P54861	DNM1_YEAST	YLL001W	P54861	DNM1_YEAST	YLL001W	1	0	Model	2x2f	1	D	0	52.7	46.4	3	353	-	A	0	52.4	46.8	3	356	-	P54861-P54861-MDL-2x2f.pdb1-D-0-A-0.pdb
P54861	DNM1_YEAST	YLL001W	P54861	DNM1_YEAST	YLL001W	2	0	Model	4bej	1	B	0	47.7	71.7	4	546	-	A	0	47.7	70.4	4	536	-	P54861-P54861-MDL-4bej.pdb1-B-0-A-0.pdb
P54861	DNM1_YEAST	YLL001W	P54861	DNM1_YEAST	YLL001W	3	0	Model	4bej	2	D	0	47.5	70	4	533	-	C	0	47.1	71.7	4	546	-	P54861-P54861-MDL-4bej.pdb2-D-0-C-0.pdb
P20081	FKBP_YEAST	YNL135C	P20081	FKBP_YEAST	YNL135C	1	0	Model	1fkj	1	A	0	58.1	92.1	9	113	-	A	1	58.1	92.1	9	113	-	P20081-P20081-MDL-1fkj.pdb1-A-0-A-1.pdb
P20081	FKBP_YEAST	YNL135C	P20081	FKBP_YEAST	YNL135C	2	0	Model	1fkj	2	A	0	58.1	92.1	9	113	-	A	3	58.1	92.1	9	113	-	P20081-P20081-MDL-1fkj.pdb2-A-0-A-3.pdb
P16861	K6PF1_YEAST	YGR240C	P16861	K6PF1_YEAST	YGR240C	1	0	Model	3o8o	2	H	0	55.9	77.8	205	972	-	E	0	96.7	78.8	203	980	-	P16861-P16861-MDL-3o8o.pdb2-H-0-E-0.pdb
P16861	K6PF1_YEAST	YGR240C	P16861	K6PF1_YEAST	YGR240C	2	0	Model	3o8o	2	F	0	55.9	77.8	205	972	-	E	0	96.7	78.8	203	980	-	P16861-P16861-MDL-3o8o.pdb2-F-0-E-0.pdb
P16861	K6PF1_YEAST	YGR240C	P16861	K6PF1_YEAST	YGR240C	3	0	Model	3o8o	1	D	0	55.9	77.8	205	972	-	A	0	96.6	78.6	205	980	-	P16861-P16861-MDL-3o8o.pdb1-D-0-A-0.pdb
P16862	K6PF2_YEAST	YMR205C	P16862	K6PF2_YEAST	YMR205C	1	0	Model	3o8o	2	H	0	100	79.6	195	957	-	E	0	56.1	79.6	196	958	-	P16862-P16862-MDL-3o8o.pdb2-H-0-E-0.pdb
P16862	K6PF2_YEAST	YMR205C	P16862	K6PF2_YEAST	YMR205C	2	0	Model	3o8o	1	D	0	100	79.6	195	957	-	C	0	56.1	79.6	196	958	-	P16862-P16862-MDL-3o8o.pdb1-D-0-C-0.pdb
P16862	K6PF2_YEAST	YMR205C	P16862	K6PF2_YEAST	YMR205C	3	0	Model	3o8o	1	D	0	100	79.6	195	957	-	A	0	56.1	79.6	196	958	-	P16862-P16862-MDL-3o8o.pdb1-D-0-A-0.pdb
P02293	H2B1_YEAST	YDR224C	P02294	H2B2_YEAST	YBL002W	1	0	Model	1tzy	1	B	0	81.5	70.2	37	128	-	F	0	81.5	70.2	37	128	-	P02293-P02294-MDL-1tzy.pdb1-B-0-F-0.pdb
P02293	H2B1_YEAST	YDR224C	P02294	H2B2_YEAST	YBL002W	2	0	Model	1tzy	1	F	0	81.5	70.2	37	128	-	B	0	81.5	70.2	37	128	-	P02293-P02294-MDL-1tzy.pdb1-F-0-B-0.pdb
P02293	H2B1_YEAST	YDR224C	P06701	SIR3_YEAST	YLR442C	1	0	Structure	4jjn	1	H	0	100	70.2	38	129	-	L	0	97.7	22	4	218	-	P02293-P06701-EXP-4jjn.pdb1-H-0-L-0.pdb
P02294	H2B2_YEAST	YBL002W	P06701	SIR3_YEAST	YLR442C	1	0	Structure	4jjn	1	D	0	100	72.5	35	129	-	K	0	97.1	21.4	6	214	-	P02294-P06701-EXP-4jjn.pdb1-D-0-K-0.pdb
P02294	H2B2_YEAST	YBL002W	P06701	SIR3_YEAST	YLR442C	2	0	Structure	4jjn	1	H	0	100	70.2	38	129	-	L	0	97.7	22	4	218	-	P02294-P06701-EXP-4jjn.pdb1-H-0-L-0.pdb
Q02486	ABF2_YEAST	YMR072W	Q02486	ABF2_YEAST	YMR072W	1	0	Model	4a3n	1	A	0	30.5	32.2	45	103	-	A	1	30.5	32.2	45	103	-	Q02486-Q02486-MDL-4a3n.pdb1-A-0-A-1.pdb
P02293	H2B1_YEAST	YDR224C	P02293	H2B1_YEAST	YDR224C	1	0	Model	1tzy	1	F	0	81.5	70.2	37	128	-	B	0	81.5	70.2	37	128	-	P02293-P02293-MDL-1tzy.pdb1-F-0-B-0.pdb
P02294	H2B2_YEAST	YBL002W	P02294	H2B2_YEAST	YBL002W	1	0	Model	1tzy	1	F	0	81.5	70.2	37	128	-	B	0	81.5	70.2	37	128	-	P02294-P02294-MDL-1tzy.pdb1-F-0-B-0.pdb
P32333	MOT1_YEAST	YPL082C	P32333	MOT1_YEAST	YPL082C	1	0	Model	1z6a	2	A	0	34.1	28.8	1259	1796	-	A	1	34.1	28.8	1259	1796	-	P32333-P32333-MDL-1z6a.pdb2-A-0-A-1.pdb
P08466	NUC1_YEAST	YJL208C	P08466	NUC1_YEAST	YJL208C	1	0	Model	3s5b	1	B	0	44.8	72.3	61	298	-	A	0	44.5	72.3	61	298	-	P08466-P08466-MDL-3s5b.pdb1-B-0-A-0.pdb
P08466	NUC1_YEAST	YJL208C	P08466	NUC1_YEAST	YJL208C	2	0	Model	3ism	1	B	0	47.4	69.6	59	287	-	A	0	47.8	69	61	287	-	P08466-P08466-MDL-3ism.pdb1-B-0-A-0.pdb
P08466	NUC1_YEAST	YJL208C	P08466	NUC1_YEAST	YJL208C	3	0	Model	4a1n	1	A	0	38.2	75.4	61	308	-	A	1	38.2	75.4	61	308	-	P08466-P08466-MDL-4a1n.pdb1-A-0-A-1.pdb
P06701	SIR3_YEAST	YLR442C	P06701	SIR3_YEAST	YLR442C	1	0	Structure	2fvu	1	B	0	88.3	21.8	1	213	-	A	0	87.8	21.8	1	213	-	P06701-P06701-EXP-2fvu.pdb1-B-0-A-0.pdb
P06701	SIR3_YEAST	YLR442C	P06701	SIR3_YEAST	YLR442C	2	0	Structure	3zco	1	A	0	100	13	849	975	-	A	1	100	13	849	975	-	P06701-P06701-EXP-3zco.pdb1-A-0-A-1.pdb
P27692	SPT5_YEAST	YML010W	P27692	SPT5_YEAST	YML010W	1	0	Structure	2exu	1	A	0	85.1	10	270	375	-	A	1	85.1	10	270	375	-	P27692-P27692-EXP-2exu.pdb1-A-0-A-1.pdb
P25044	PTP1_YEAST	YDL230W	P25044	PTP1_YEAST	YDL230W	1	0	Model	2h03	2	A	0	32.2	86.3	38	326	-	A	1	32.2	86.3	38	326	-	P25044-P25044-MDL-2h03.pdb2-A-0-A-1.pdb
P06780	RHO1_YEAST	YPR165W	P06780	RHO1_YEAST	YPR165W	1	0	Model	2p2l	2	B	0	58.4	82.8	12	184	-	C	1	58.4	82.8	12	184	-	P06780-P06780-MDL-2p2l.pdb2-B-0-C-1.pdb
P06780	RHO1_YEAST	YPR165W	P06780	RHO1_YEAST	YPR165W	2	0	Model	2p2l	2	B	1	58.4	82.8	12	184	-	C	1	58.4	82.8	12	184	-	P06780-P06780-MDL-2p2l.pdb2-B-1-C-1.pdb
P06780	RHO1_YEAST	YPR165W	P06780	RHO1_YEAST	YPR165W	3	0	Model	1z2c	1	A	0	73.4	84.7	8	184	-	A	1	73.4	84.7	8	184	-	P06780-P06780-MDL-1z2c.pdb1-A-0-A-1.pdb
P33327	DHE2_YEAST	YDL215C	P33327	DHE2_YEAST	YDL215C	1	0	Dom_dom_model	2bma	-	A	-	16.5	21.8	714	986	ELFV_dehydrog	F	-	16.5	21.8	714	986	ELFV_dehydrog	P33327-P33327-MDD-ELFV_dehydrog-ELFV_dehydrog-2bma-A-200-446-F-200-446.pdb
P12695	ODP2_YEAST	YNL071W	P32473	ODPB_YEAST	YBR221C	1	0	Dom_dom_model	3dv0	-	I	-	41	7.9	172	209	E3_binding	B	-	43.1	30.9	232	346	Transketolase_C	P12695-P32473-MDD-E3_binding-Transketolase_C-3dv0-I-127-165-B-193-315.pdb
P16387	ODPA_YEAST	YER178W	P32473	ODPB_YEAST	YBR221C	1	0	Model	3exh	2	G	0	56.4	74.3	68	379	-	H	0	62.2	89.3	39	365	-	P16387-P32473-MDL-3exh.pdb2-G-0-H-0.pdb
P16387	ODPA_YEAST	YER178W	P32473	ODPB_YEAST	YBR221C	2	0	Model	3exh	1	C	0	56.4	74.3	68	379	-	B	0	62.2	89.3	39	365	-	P16387-P32473-MDL-3exh.pdb1-C-0-B-0.pdb
P16387	ODPA_YEAST	YER178W	P32473	ODPB_YEAST	YBR221C	3	0	Model	3exh	2	G	0	56.4	74.3	68	379	-	F	0	62.2	89.3	39	365	-	P16387-P32473-MDL-3exh.pdb2-G-0-F-0.pdb
P32898	CYM1_YEAST	YDR430C	P32898	CYM1_YEAST	YDR430C	1	0	Dom_dom_model	3ih6	-	C	-	14.3	10.1	302	405	Peptidase_M16_C	E	-	14.2	10.2	301	405	Peptidase_M16_C	P32898-P32898-MDD-Peptidase_M16_C-Peptidase_M16_C-3ih6-C-263-381-E-261-381.pdb
P12695	ODP2_YEAST	YNL071W	P12695	ODP2_YEAST	YNL071W	1	0	Dom_dom_model	3mae	-	A	-	25	46.3	250	478	2-oxoacid_dh	C	-	25	46.3	250	478	2-oxoacid_dh	P12695-P12695-MDD-2-oxoacid_dh-2-oxoacid_dh-3mae-A-183-411-C-183-411.pdb
P16387	ODPA_YEAST	YER178W	P16387	ODPA_YEAST	YER178W	1	0	Model	3exe	1	C	0	56.1	74.3	68	379	-	A	0	56.1	74.3	68	379	-	P16387-P16387-MDL-3exe.pdb1-C-0-A-0.pdb
P16387	ODPA_YEAST	YER178W	P16387	ODPA_YEAST	YER178W	2	0	Model	3exf	2	G	0	56.4	74.3	68	379	-	E	0	56.4	74.3	68	379	-	P16387-P16387-MDL-3exf.pdb2-G-0-E-0.pdb
P16387	ODPA_YEAST	YER178W	P16387	ODPA_YEAST	YER178W	3	0	Model	3exf	1	C	0	56.4	74.3	68	379	-	A	0	56.4	74.3	68	379	-	P16387-P16387-MDL-3exf.pdb1-C-0-A-0.pdb
P32473	ODPB_YEAST	YBR221C	P32473	ODPB_YEAST	YBR221C	1	0	Model	2ozl	1	D	0	62.2	89.3	39	365	-	B	0	62.2	89.3	39	365	-	P32473-P32473-MDL-2ozl.pdb1-D-0-B-0.pdb
P32473	ODPB_YEAST	YBR221C	P32473	ODPB_YEAST	YBR221C	2	0	Model	3exe	2	H	0	62.2	89.3	39	365	-	F	0	62.2	89.3	39	365	-	P32473-P32473-MDL-3exe.pdb2-H-0-F-0.pdb
P32473	ODPB_YEAST	YBR221C	P32473	ODPB_YEAST	YBR221C	3	0	Model	3exe	1	D	0	62.2	89.3	39	365	-	B	0	62.2	89.3	39	365	-	P32473-P32473-MDL-3exe.pdb1-D-0-B-0.pdb
P39960	BEM2_YEAST	YER155C	P39960	BEM2_YEAST	YER155C	1	0	Dom_dom_model	3byi	-	A	-	28.3	6.8	1981	2138	RhoGAP	C	-	28.3	6.8	1981	2138	RhoGAP	P39960-P39960-MDD-RhoGAP-RhoGAP-3byi-A-295-447-C-295-447.pdb
P54115	ALDH6_YEAST	YPL061W	P54115	ALDH6_YEAST	YPL061W	1	0	Model	1o9j	1	D	0	47.4	95.4	24	500	-	C	0	47.4	95.4	24	500	-	P54115-P54115-MDL-1o9j.pdb1-D-0-C-0.pdb
P54115	ALDH6_YEAST	YPL061W	P54115	ALDH6_YEAST	YPL061W	2	0	Model	1o9j	1	D	0	47.4	95.4	24	500	-	A	0	47.4	95.4	24	500	-	P54115-P54115-MDL-1o9j.pdb1-D-0-A-0.pdb
P54115	ALDH6_YEAST	YPL061W	P54115	ALDH6_YEAST	YPL061W	3	0	Model	1o9j	1	B	0	47.4	95.4	24	500	-	A	0	47.4	95.4	24	500	-	P54115-P54115-MDL-1o9j.pdb1-B-0-A-0.pdb
P23291	KC11_YEAST	YHR135C	P23291	KC11_YEAST	YHR135C	1	0	Model	1csn	1	A	0	67.1	53.7	64	352	-	A	1	67.1	53.7	64	352	-	P23291-P23291-MDL-1csn.pdb1-A-0-A-1.pdb
P23291	KC11_YEAST	YHR135C	P23291	KC11_YEAST	YHR135C	2	0	Model	1ckj	1	B	0	53.6	54.1	65	355	-	A	0	53.4	54.6	65	358	-	P23291-P23291-MDL-1ckj.pdb1-B-0-A-0.pdb
P23291	KC11_YEAST	YHR135C	P23291	KC11_YEAST	YHR135C	3	0	Model	2csn	1	A	0	67.1	53.7	64	352	-	A	1	67.1	53.7	64	352	-	P23291-P23291-MDL-2csn.pdb1-A-0-A-1.pdb
P40354	NTA1_YEAST	YJR062C	P40354	NTA1_YEAST	YJR062C	1	0	Dom_dom_model	1fo6	-	A	-	14.3	29.3	24	162	CN_hydrolase	D	-	14.3	29.3	24	162	CN_hydrolase	P40354-P40354-MDD-CN_hydrolase-CN_hydrolase-1fo6-A-6-197-D-6-197.pdb
P00950	PMG1_YEAST	YKL152C	P00950	PMG1_YEAST	YKL152C	1	0	Structure	1qhf	1	B	1	100	97.2	2	241	-	A	1	100	97.2	2	241	-	P00950-P00950-EXP-1qhf.pdb1-B-1-A-1.pdb
P00950	PMG1_YEAST	YKL152C	P00950	PMG1_YEAST	YKL152C	2	0	Structure	1qhf	1	A	0	100	97.2	2	241	-	A	1	100	97.2	2	241	-	P00950-P00950-EXP-1qhf.pdb1-A-0-A-1.pdb
P00950	PMG1_YEAST	YKL152C	P00950	PMG1_YEAST	YKL152C	3	0	Structure	1qhf	1	B	0	100	97.2	2	241	-	A	0	100	97.2	2	241	-	P00950-P00950-EXP-1qhf.pdb1-B-0-A-0.pdb
P00950	PMG1_YEAST	YKL152C	P00950	PMG1_YEAST	YKL152C	4	0	Structure	1qhf	1	B	0	100	97.2	2	241	-	B	1	100	97.2	2	241	-	P00950-P00950-EXP-1qhf.pdb1-B-0-B-1.pdb
P00950	PMG1_YEAST	YKL152C	P00950	PMG1_YEAST	YKL152C	5	0	Structure	5pgm	1	D	0	100	95.1	2	236	-	B	0	100	95.1	2	236	-	P00950-P00950-EXP-5pgm.pdb1-D-0-B-0.pdb
P00950	PMG1_YEAST	YKL152C	P00950	PMG1_YEAST	YKL152C	6	0	Structure	5pgm	1	D	0	100	95.1	2	236	-	C	0	100	95.1	2	236	-	P00950-P00950-EXP-5pgm.pdb1-D-0-C-0.pdb
P00950	PMG1_YEAST	YKL152C	P00950	PMG1_YEAST	YKL152C	7	0	Structure	5pgm	2	H	0	100	95.1	2	236	-	E	0	100	94.7	2	235	-	P00950-P00950-EXP-5pgm.pdb2-H-0-E-0.pdb
P00950	PMG1_YEAST	YKL152C	P00950	PMG1_YEAST	YKL152C	8	0	Structure	5pgm	2	F	0	100	95.1	2	236	-	G	0	100	94.7	2	235	-	P00950-P00950-EXP-5pgm.pdb2-F-0-G-0.pdb
P00950	PMG1_YEAST	YKL152C	P00950	PMG1_YEAST	YKL152C	9	0	Structure	5pgm	1	C	0	100	95.1	2	236	-	A	0	100	94.7	2	235	-	P00950-P00950-EXP-5pgm.pdb1-C-0-A-0.pdb
P00950	PMG1_YEAST	YKL152C	P00950	PMG1_YEAST	YKL152C	10	0	Structure	5pgm	2	H	0	100	95.1	2	236	-	G	0	100	94.7	2	235	-	P00950-P00950-EXP-5pgm.pdb2-H-0-G-0.pdb
P00950	PMG1_YEAST	YKL152C	P00950	PMG1_YEAST	YKL152C	11	0	Structure	5pgm	2	F	0	100	95.1	2	236	-	E	0	100	94.7	2	235	-	P00950-P00950-EXP-5pgm.pdb2-F-0-E-0.pdb
P00950	PMG1_YEAST	YKL152C	P00950	PMG1_YEAST	YKL152C	12	0	Structure	5pgm	1	B	0	100	95.1	2	236	-	A	0	100	94.7	2	235	-	P00950-P00950-EXP-5pgm.pdb1-B-0-A-0.pdb
P00950	PMG1_YEAST	YKL152C	P00950	PMG1_YEAST	YKL152C	13	0	Structure	4pgm	1	D	0	100	95.5	2	237	-	B	0	100	95.5	2	237	-	P00950-P00950-EXP-4pgm.pdb1-D-0-B-0.pdb
P00950	PMG1_YEAST	YKL152C	P00950	PMG1_YEAST	YKL152C	14	0	Structure	4pgm	1	B	0	100	95.5	2	237	-	A	0	100	95.1	2	236	-	P00950-P00950-EXP-4pgm.pdb1-B-0-A-0.pdb
P00950	PMG1_YEAST	YKL152C	P00950	PMG1_YEAST	YKL152C	15	0	Structure	4pgm	1	D	0	100	95.5	2	237	-	C	0	100	94.7	2	235	-	P00950-P00950-EXP-4pgm.pdb1-D-0-C-0.pdb
P00950	PMG1_YEAST	YKL152C	P00950	PMG1_YEAST	YKL152C	16	0	Structure	4pgm	1	C	0	100	94.7	2	235	-	A	0	100	95.1	2	236	-	P00950-P00950-EXP-4pgm.pdb1-C-0-A-0.pdb
P00950	PMG1_YEAST	YKL152C	P00950	PMG1_YEAST	YKL152C	17	0	Structure	1bq4	1	B	0	100	95.1	2	236	-	A	0	100	94.7	2	235	-	P00950-P00950-EXP-1bq4.pdb1-B-0-A-0.pdb
P00950	PMG1_YEAST	YKL152C	P00950	PMG1_YEAST	YKL152C	18	0	Structure	1bq4	1	D	0	100	94.7	2	235	-	C	0	100	95.1	2	236	-	P00950-P00950-EXP-1bq4.pdb1-D-0-C-0.pdb
P00950	PMG1_YEAST	YKL152C	P00950	PMG1_YEAST	YKL152C	19	0	Structure	1bq4	1	D	0	100	94.7	2	235	-	B	0	100	95.1	2	236	-	P00950-P00950-EXP-1bq4.pdb1-D-0-B-0.pdb
P00950	PMG1_YEAST	YKL152C	P00950	PMG1_YEAST	YKL152C	20	0	Structure	1bq4	1	C	0	100	95.1	2	236	-	A	0	100	94.7	2	235	-	P00950-P00950-EXP-1bq4.pdb1-C-0-A-0.pdb
P00950	PMG1_YEAST	YKL152C	P00950	PMG1_YEAST	YKL152C	21	0	Structure	1bq3	1	C	0	100	95.1	2	236	-	A	0	100	94.7	2	235	-	P00950-P00950-EXP-1bq3.pdb1-C-0-A-0.pdb
P00950	PMG1_YEAST	YKL152C	P00950	PMG1_YEAST	YKL152C	22	0	Structure	1bq3	1	D	0	100	94.7	2	235	-	B	0	100	95.1	2	236	-	P00950-P00950-EXP-1bq3.pdb1-D-0-B-0.pdb
P00950	PMG1_YEAST	YKL152C	P00950	PMG1_YEAST	YKL152C	23	0	Structure	1bq3	1	B	0	100	95.1	2	236	-	A	0	100	94.7	2	235	-	P00950-P00950-EXP-1bq3.pdb1-B-0-A-0.pdb
P00950	PMG1_YEAST	YKL152C	P00950	PMG1_YEAST	YKL152C	24	0	Structure	1bq3	1	D	0	100	94.7	2	235	-	C	0	100	95.1	2	236	-	P00950-P00950-EXP-1bq3.pdb1-D-0-C-0.pdb
P00950	PMG1_YEAST	YKL152C	P00950	PMG1_YEAST	YKL152C	25	0	Structure	3pgm	1	B	0	94.4	93.9	2	233	-	B	1	94.4	93.9	2	233	-	P00950-P00950-EXP-3pgm.pdb1-B-0-B-1.pdb
P00950	PMG1_YEAST	YKL152C	P00950	PMG1_YEAST	YKL152C	26	0	Structure	3pgm	1	B	0	94.4	93.9	2	233	-	A	0	94.4	93.9	2	233	-	P00950-P00950-EXP-3pgm.pdb1-B-0-A-0.pdb
P00950	PMG1_YEAST	YKL152C	P00950	PMG1_YEAST	YKL152C	27	0	Structure	3pgm	1	A	0	94.4	93.9	2	233	-	A	1	94.4	93.9	2	233	-	P00950-P00950-EXP-3pgm.pdb1-A-0-A-1.pdb
P00950	PMG1_YEAST	YKL152C	P00950	PMG1_YEAST	YKL152C	28	0	Structure	3pgm	1	B	1	94.4	93.9	2	233	-	A	1	94.4	93.9	2	233	-	P00950-P00950-EXP-3pgm.pdb1-B-1-A-1.pdb
P34760	TSA1_YEAST	YML028W	P34760	TSA1_YEAST	YML028W	1	0	Structure	3sbc	1	B	0	99.5	100	1	196	-	C	0	99.5	100	1	196	-	P34760-P34760-EXP-3sbc.pdb1-B-0-C-0.pdb
P34760	TSA1_YEAST	YML028W	P34760	TSA1_YEAST	YML028W	2	0	Structure	3sbc	1	B	0	99.5	100	1	196	-	A	0	99.5	99.5	2	196	-	P34760-P34760-EXP-3sbc.pdb1-B-0-A-0.pdb
P34760	TSA1_YEAST	YML028W	P34760	TSA1_YEAST	YML028W	3	0	Structure	3sbc	1	J	0	99.5	99.5	2	196	-	A	0	99.5	99.5	2	196	-	P34760-P34760-EXP-3sbc.pdb1-J-0-A-0.pdb
P34760	TSA1_YEAST	YML028W	P34760	TSA1_YEAST	YML028W	4	0	Structure	3sbc	1	H	0	99.5	99.5	2	196	-	I	0	99.5	99.5	2	196	-	P34760-P34760-EXP-3sbc.pdb1-H-0-I-0.pdb
P34760	TSA1_YEAST	YML028W	P34760	TSA1_YEAST	YML028W	5	0	Structure	3sbc	1	H	0	99.5	99.5	2	196	-	G	0	99.5	99.5	2	196	-	P34760-P34760-EXP-3sbc.pdb1-H-0-G-0.pdb
P34760	TSA1_YEAST	YML028W	P34760	TSA1_YEAST	YML028W	6	0	Structure	3sbc	1	J	0	99.5	99.5	2	196	-	I	0	99.5	99.5	2	196	-	P34760-P34760-EXP-3sbc.pdb1-J-0-I-0.pdb
P34760	TSA1_YEAST	YML028W	P34760	TSA1_YEAST	YML028W	7	0	Structure	3sbc	1	D	0	99.5	99	2	195	-	C	0	99.5	100	1	196	-	P34760-P34760-EXP-3sbc.pdb1-D-0-C-0.pdb
P34760	TSA1_YEAST	YML028W	P34760	TSA1_YEAST	YML028W	8	0	Structure	3sbc	1	F	0	99.5	99	2	195	-	G	0	99.5	99.5	2	196	-	P34760-P34760-EXP-3sbc.pdb1-F-0-G-0.pdb
P34760	TSA1_YEAST	YML028W	P34760	TSA1_YEAST	YML028W	9	0	Structure	3sbc	1	D	0	99.5	99	2	195	-	E	0	99.5	99.5	2	196	-	P34760-P34760-EXP-3sbc.pdb1-D-0-E-0.pdb
P34760	TSA1_YEAST	YML028W	P34760	TSA1_YEAST	YML028W	10	0	Structure	3sbc	1	F	0	99.5	99	2	195	-	E	0	99.5	99.5	2	196	-	P34760-P34760-EXP-3sbc.pdb1-F-0-E-0.pdb
P09440	C1TM_YEAST	YBR084W	P09440	C1TM_YEAST	YBR084W	1	0	Model	4jim	2	A	0	45.2	64.8	344	975	-	A	1	45.2	64.8	344	975	-	P09440-P09440-MDL-4jim.pdb2-A-0-A-1.pdb
P09440	C1TM_YEAST	YBR084W	P09440	C1TM_YEAST	YBR084W	2	0	Model	4jim	3	A	0	45.2	64.8	344	975	-	A	1	45.2	64.8	344	975	-	P09440-P09440-MDL-4jim.pdb3-A-0-A-1.pdb
P09440	C1TM_YEAST	YBR084W	P09440	C1TM_YEAST	YBR084W	3	0	Model	4ioj	2	B	0	45.2	64.8	344	975	-	A	0	45.2	64.8	344	975	-	P09440-P09440-MDL-4ioj.pdb2-B-0-A-0.pdb
P24783	DBP2_YEAST	YNL112W	P24783	DBP2_YEAST	YNL112W	1	0	Model	2gxq	1	A	0	41.4	36.3	124	321	-	A	1	41.4	36.3	124	321	-	P24783-P24783-MDL-2gxq.pdb1-A-0-A-1.pdb
P24783	DBP2_YEAST	YNL112W	P24783	DBP2_YEAST	YNL112W	2	0	Model	2gxs	1	B	0	41.4	36.3	124	321	-	A	0	41.4	36.3	124	321	-	P24783-P24783-MDL-2gxs.pdb1-B-0-A-0.pdb
P24783	DBP2_YEAST	YNL112W	P24783	DBP2_YEAST	YNL112W	3	0	Model	1wrb	3	B	1	46	38.6	112	322	-	A	0	46	38.6	112	322	-	P24783-P24783-MDL-1wrb.pdb3-B-1-A-0.pdb
P39730	IF2P_YEAST	YAL035W	P39730	IF2P_YEAST	YAL035W	1	0	Dom_dom_model	2hdn	-	J	-	16.2	12.7	437	616	GTP_EFTU	L	-	16.2	12.7	437	616	GTP_EFTU	P39730-P39730-MDD-GTP_EFTU-GTP_EFTU-2hdn-J-59-201-L-59-201.pdb
P09624	DLDH_YEAST	YFL018C	P09624	DLDH_YEAST	YFL018C	1	0	Structure	1v59	1	B	0	100	95.8	22	499	-	A	0	100	95.8	22	499	-	P09624-P09624-EXP-1v59.pdb1-B-0-A-0.pdb
P09624	DLDH_YEAST	YFL018C	P09624	DLDH_YEAST	YFL018C	2	0	Structure	1jeh	1	B	0	100	95.8	22	499	-	A	0	100	95.8	22	499	-	P09624-P09624-EXP-1jeh.pdb1-B-0-A-0.pdb
P19262	ODO2_YEAST	YDR148C	P19262	ODO2_YEAST	YDR148C	1	0	Model	1scz	1	A	3	57.8	49.7	233	462	-	A	5	57.8	49.7	233	462	-	P19262-P19262-MDL-1scz.pdb1-A-3-A-5.pdb
P19262	ODO2_YEAST	YDR148C	P19262	ODO2_YEAST	YDR148C	2	0	Model	1scz	1	A	14	57.8	49.7	233	462	-	A	20	57.8	49.7	233	462	-	P19262-P19262-MDL-1scz.pdb1-A-14-A-20.pdb
P19262	ODO2_YEAST	YDR148C	P19262	ODO2_YEAST	YDR148C	3	0	Model	1scz	1	A	0	57.8	49.7	233	462	-	A	19	57.8	49.7	233	462	-	P19262-P19262-MDL-1scz.pdb1-A-0-A-19.pdb
P21801	DHSB_YEAST	YLL041C	Q00711	DHSA_YEAST	YKL148C	1	0	Model	2h88	2	O	0	75	88.3	30	264	-	N	0	68.5	93.1	45	640	-	P21801-Q00711-MDL-2h88.pdb2-O-0-N-0.pdb
P21801	DHSB_YEAST	YLL041C	Q00711	DHSA_YEAST	YKL148C	2	0	Model	2h88	1	B	0	75	88.3	30	264	-	A	0	68.5	93.1	45	640	-	P21801-Q00711-MDL-2h88.pdb1-B-0-A-0.pdb
P21801	DHSB_YEAST	YLL041C	Q00711	DHSA_YEAST	YKL148C	3	0	Model	2h88	3	O	1	75	88.3	30	264	-	A	0	68.5	93.1	45	640	-	P21801-Q00711-MDL-2h88.pdb3-O-1-A-0.pdb
P21801	DHSB_YEAST	YLL041C	P47052	DHSX_YEAST	YJL045W	1	0	Model	2h88	2	O	0	75	88.3	30	264	-	N	0	67.9	94	39	634	-	P21801-P47052-MDL-2h88.pdb2-O-0-N-0.pdb
P21801	DHSB_YEAST	YLL041C	P47052	DHSX_YEAST	YJL045W	2	0	Model	2h88	3	O	1	75	88.3	30	264	-	A	0	67.9	94	39	634	-	P21801-P47052-MDL-2h88.pdb3-O-1-A-0.pdb
P21801	DHSB_YEAST	YLL041C	P47052	DHSX_YEAST	YJL045W	3	0	Model	2h88	1	B	0	75	88.3	30	264	-	A	0	67.9	94	39	634	-	P21801-P47052-MDL-2h88.pdb1-B-0-A-0.pdb
P38228	TCM62_YEAST	YBR044C	P38228	TCM62_YEAST	YBR044C	1	0	Dom_dom_model	2cgt	-	A	-	11.9	65.7	124	561	Cpn60_TCP1	H	-	12.1	65.7	124	561	Cpn60_TCP1	P38228-P38228-MDD-Cpn60_TCP1-Cpn60_TCP1-2cgt-A-23-525-H-23-525.pdb
P07560	SEC4_YEAST	YFL005W	Q08484	GYP1_YEAST	YOR070C	1	0	Model	2g77	1	B	0	42.6	75.3	20	181	-	A	0	85.1	60.9	246	633	-	P07560-Q08484-MDL-2g77.pdb1-B-0-A-0.pdb
P01123	YPT1_YEAST	YFL038C	Q08484	GYP1_YEAST	YOR070C	1	0	Model	2g77	1	B	0	42.3	79.1	8	170	-	A	0	85.1	60.9	246	633	-	P01123-Q08484-MDL-2g77.pdb1-B-0-A-0.pdb
P38555	YPT31_YEAST	YER031C	Q08484	GYP1_YEAST	YOR070C	1	0	Dom_dom_model	4hlq	-	J	-	51.6	72.2	15	175	Ras	I	-	14.7	30.1	285	510	RabGAP-TBC	P38555-Q08484-MDD-Ras-RabGAP-TBC-4hlq-J-10-171-I-63-266.pdb
P01123	YPT1_YEAST	YFL038C	P07560	SEC4_YEAST	YFL005W	1	0	Model	1g16	1	D	0	51.2	79.6	10	173	-	C	0	97	77.7	19	185	-	P01123-P07560-MDL-1g16.pdb1-D-0-C-0.pdb
P01123	YPT1_YEAST	YFL038C	P07560	SEC4_YEAST	YFL005W	2	0	Model	1g16	1	B	0	51.2	79.6	10	173	-	C	0	97	77.7	19	185	-	P01123-P07560-MDL-1g16.pdb1-B-0-C-0.pdb
P01123	YPT1_YEAST	YFL038C	P07560	SEC4_YEAST	YFL005W	3	0	Model	1g16	1	C	0	53.7	79.6	10	173	-	B	0	92.9	78.1	19	186	-	P01123-P07560-MDL-1g16.pdb1-C-0-B-0.pdb
P07560	SEC4_YEAST	YFL005W	P38555	YPT31_YEAST	YER031C	1	0	Model	1g16	1	C	0	97	77.7	19	185	-	B	0	45.1	73.5	15	178	-	P07560-P38555-MDL-1g16.pdb1-C-0-B-0.pdb
P07560	SEC4_YEAST	YFL005W	P38555	YPT31_YEAST	YER031C	2	0	Model	1g16	1	C	0	97	77.7	19	185	-	D	0	45.1	73.5	15	178	-	P07560-P38555-MDL-1g16.pdb1-C-0-D-0.pdb
P07560	SEC4_YEAST	YFL005W	P38555	YPT31_YEAST	YER031C	3	0	Model	1g16	1	B	0	92.9	78.1	19	186	-	C	0	47	73.5	15	178	-	P07560-P38555-MDL-1g16.pdb1-B-0-C-0.pdb
P01123	YPT1_YEAST	YFL038C	P38555	YPT31_YEAST	YER031C	1	0	Model	3rwo	3	A	0	52.8	77.2	4	162	-	B	0	86.6	77.1	7	178	-	P01123-P38555-MDL-3rwo.pdb3-A-0-B-0.pdb
P01123	YPT1_YEAST	YFL038C	P38555	YPT31_YEAST	YER031C	2	0	Model	3rwo	3	B	0	52.8	77.2	4	162	-	A	0	86.5	76.2	9	178	-	P01123-P38555-MDL-3rwo.pdb3-B-0-A-0.pdb
P01123	YPT1_YEAST	YFL038C	P38555	YPT31_YEAST	YER031C	3	0	Model	1oiv	1	B	0	53.6	80.6	4	169	-	A	0	71.3	74.9	9	175	-	P01123-P38555-MDL-1oiv.pdb1-B-0-A-0.pdb
P07560	SEC4_YEAST	YFL005W	P07560	SEC4_YEAST	YFL005W	1	0	Structure	1g16	1	B	0	92.9	78.1	19	186	-	C	0	97	77.7	19	185	-	P07560-P07560-EXP-1g16.pdb1-B-0-C-0.pdb
P07560	SEC4_YEAST	YFL005W	P07560	SEC4_YEAST	YFL005W	2	0	Structure	1g16	1	D	0	92.8	77.7	20	186	-	C	0	97	77.7	19	185	-	P07560-P07560-EXP-1g16.pdb1-D-0-C-0.pdb
P07560	SEC4_YEAST	YFL005W	P07560	SEC4_YEAST	YFL005W	3	0	Structure	1g16	1	D	0	92.8	77.7	20	186	-	B	0	92.9	78.1	19	186	-	P07560-P07560-EXP-1g16.pdb1-D-0-B-0.pdb
P38555	YPT31_YEAST	YER031C	P38555	YPT31_YEAST	YER031C	1	0	Model	3rwo	3	B	0	86.6	77.1	7	178	-	A	0	86.5	76.2	9	178	-	P38555-P38555-MDL-3rwo.pdb3-B-0-A-0.pdb
P38555	YPT31_YEAST	YER031C	P38555	YPT31_YEAST	YER031C	2	0	Model	1oiv	1	B	0	71.3	74.9	9	175	-	A	0	71.3	74.9	9	175	-	P38555-P38555-MDL-1oiv.pdb1-B-0-A-0.pdb
P38555	YPT31_YEAST	YER031C	P38555	YPT31_YEAST	YER031C	3	0	Model	1z0a	5	C	0	51.2	75.3	10	177	-	A	0	51.2	75.3	10	177	-	P38555-P38555-MDL-1z0a.pdb5-C-0-A-0.pdb
P32657	CHD1_YEAST	YER164W	P32657	CHD1_YEAST	YER164W	1	0	Structure	2h1e	2	A	0	100	11.2	175	339	-	A	1	100	11.2	175	339	-	P32657-P32657-EXP-2h1e.pdb2-A-0-A-1.pdb
P32657	CHD1_YEAST	YER164W	P32657	CHD1_YEAST	YER164W	2	0	Structure	2h1e	2	B	1	100	11.1	177	339	-	A	1	100	11.2	175	339	-	P32657-P32657-EXP-2h1e.pdb2-B-1-A-1.pdb
P32657	CHD1_YEAST	YER164W	P32657	CHD1_YEAST	YER164W	3	0	Structure	2h1e	2	B	0	100	11.1	177	339	-	A	0	100	11.2	175	339	-	P32657-P32657-EXP-2h1e.pdb2-B-0-A-0.pdb
P32657	CHD1_YEAST	YER164W	P32657	CHD1_YEAST	YER164W	4	0	Structure	2h1e	2	B	0	100	11.1	177	339	-	A	1	100	11.2	175	339	-	P32657-P32657-EXP-2h1e.pdb2-B-0-A-1.pdb
P32657	CHD1_YEAST	YER164W	P32657	CHD1_YEAST	YER164W	5	0	Structure	2h1e	1	B	0	100	11.1	177	339	-	A	0	100	11.2	175	339	-	P32657-P32657-EXP-2h1e.pdb1-B-0-A-0.pdb
P32657	CHD1_YEAST	YER164W	P32657	CHD1_YEAST	YER164W	6	0	Structure	2h1e	2	B	1	100	11.1	177	339	-	A	0	100	11.2	175	339	-	P32657-P32657-EXP-2h1e.pdb2-B-1-A-0.pdb
P32657	CHD1_YEAST	YER164W	P32657	CHD1_YEAST	YER164W	7	0	Structure	2h1e	2	B	0	100	11.1	177	339	-	B	1	100	11.1	177	339	-	P32657-P32657-EXP-2h1e.pdb2-B-0-B-1.pdb
P32657	CHD1_YEAST	YER164W	P32657	CHD1_YEAST	YER164W	8	0	Structure	3mwy	2	W	0	93	51	175	922	-	W	1	93	51	175	922	-	P32657-P32657-EXP-3mwy.pdb2-W-0-W-1.pdb
P35177	SPT7_YEAST	YBR081C	P35177	SPT7_YEAST	YBR081C	1	0	Model	2ydw	1	B	0	30.3	7.3	451	547	-	B	1	30.3	7.3	451	547	-	P35177-P35177-MDL-2ydw.pdb1-B-0-B-1.pdb
P35177	SPT7_YEAST	YBR081C	P35177	SPT7_YEAST	YBR081C	2	0	Model	4a9e	2	C	0	30.3	7.3	451	547	-	C	1	30.3	7.3	451	547	-	P35177-P35177-MDL-4a9e.pdb2-C-0-C-1.pdb
P36130	CAF4_YEAST	YKR036C	P40515	FIS1_YEAST	YIL065C	1	0	Structure	2pqr	2	D	0	100	7	78	122	-	B	0	100	80	5	128	-	P36130-P40515-EXP-2pqr.pdb2-D-0-B-0.pdb
P36130	CAF4_YEAST	YKR036C	P40515	FIS1_YEAST	YIL065C	2	0	Structure	2pqr	1	C	0	90.9	6.8	81	124	-	A	0	100	63.2	5	102	-	P36130-P40515-EXP-2pqr.pdb1-C-0-A-0.pdb
P40515	FIS1_YEAST	YIL065C	P47025	MDV1_YEAST	YJL112W	1	0	Structure	2pqn	1	A	0	100	81.3	4	129	-	B	0	100	2.8	145	164	-	P40515-P47025-EXP-2pqn.pdb1-A-0-B-0.pdb
P40515	FIS1_YEAST	YIL065C	P47025	MDV1_YEAST	YJL112W	2	0	Structure	3uux	1	A	0	100	81.9	3	129	-	B	0	62.8	29	94	300	-	P40515-P47025-EXP-3uux.pdb1-A-0-B-0.pdb
P40515	FIS1_YEAST	YIL065C	P47025	MDV1_YEAST	YJL112W	3	0	Structure	3uux	3	A	1	100	81.9	3	129	-	B	1	62.8	29	94	300	-	P40515-P47025-EXP-3uux.pdb3-A-1-B-1.pdb
P40515	FIS1_YEAST	YIL065C	P47025	MDV1_YEAST	YJL112W	4	0	Structure	3uux	3	A	0	100	81.9	3	129	-	B	0	62.8	29	94	300	-	P40515-P47025-EXP-3uux.pdb3-A-0-B-0.pdb
P40515	FIS1_YEAST	YIL065C	P47025	MDV1_YEAST	YJL112W	5	0	Structure	3uux	4	C	0	100	80.6	3	127	-	D	0	63	29.1	94	301	-	P40515-P47025-EXP-3uux.pdb4-C-0-D-0.pdb
P40515	FIS1_YEAST	YIL065C	P47025	MDV1_YEAST	YJL112W	6	0	Structure	3uux	2	C	1	100	80.6	3	127	-	D	1	63	29.1	94	301	-	P40515-P47025-EXP-3uux.pdb2-C-1-D-1.pdb
P40515	FIS1_YEAST	YIL065C	P47025	MDV1_YEAST	YJL112W	7	0	Structure	3uux	2	C	0	100	80.6	3	127	-	D	0	63	29.1	94	301	-	P40515-P47025-EXP-3uux.pdb2-C-0-D-0.pdb
P47025	MDV1_YEAST	YJL112W	P47025	MDV1_YEAST	YJL112W	1	0	Structure	2xu6	1	B	0	96.8	8.7	231	292	-	A	0	96.7	8.5	231	291	-	P47025-P47025-EXP-2xu6.pdb1-B-0-A-0.pdb
P47025	MDV1_YEAST	YJL112W	P47025	MDV1_YEAST	YJL112W	2	0	Structure	3uux	2	D	0	63	29.1	94	301	-	D	1	63	29.1	94	301	-	P47025-P47025-EXP-3uux.pdb2-D-0-D-1.pdb
P47025	MDV1_YEAST	YJL112W	P47025	MDV1_YEAST	YJL112W	3	0	Structure	3uux	3	B	0	62.8	29	94	300	-	B	1	62.8	29	94	300	-	P47025-P47025-EXP-3uux.pdb3-B-0-B-1.pdb
P04806	HXKA_YEAST	YFR053C	P04807	HXKB_YEAST	YGL253W	1	0	Model	3o4w	1	B	0	71.1	99.6	2	484	-	A	0	73.3	99.6	2	485	-	P04806-P04807-MDL-3o4w.pdb1-B-0-A-0.pdb
P04806	HXKA_YEAST	YFR053C	P04807	HXKB_YEAST	YGL253W	2	0	Model	3o4w	1	A	0	71.1	99.6	2	484	-	B	0	73.3	99.6	2	485	-	P04806-P04807-MDL-3o4w.pdb1-A-0-B-0.pdb
P04806	HXKA_YEAST	YFR053C	P04807	HXKB_YEAST	YGL253W	3	0	Model	3o1w	1	A	0	71.1	99.6	2	484	-	B	0	73.3	99.6	2	485	-	P04806-P04807-MDL-3o1w.pdb1-A-0-B-0.pdb
P04807	HXKB_YEAST	YGL253W	P04807	HXKB_YEAST	YGL253W	1	0	Model	3o4w	1	B	0	73.3	99.6	2	485	-	A	0	73.3	99.6	2	485	-	P04807-P04807-MDL-3o4w.pdb1-B-0-A-0.pdb
P04807	HXKB_YEAST	YGL253W	P04807	HXKB_YEAST	YGL253W	2	0	Model	3o1w	1	B	0	73.3	99.6	2	485	-	A	0	73.3	99.6	2	485	-	P04807-P04807-MDL-3o1w.pdb1-B-0-A-0.pdb
P04807	HXKB_YEAST	YGL253W	P04807	HXKB_YEAST	YGL253W	3	0	Model	3o5b	1	B	0	73.2	98.4	8	485	-	A	0	73.3	98.6	7	485	-	P04807-P04807-MDL-3o5b.pdb1-B-0-A-0.pdb
P06782	SNF1_YEAST	YDR477W	P06782	SNF1_YEAST	YDR477W	1	0	Structure	3hyh	3	B	0	88.9	41.4	54	315	-	A	0	90.8	41.4	54	315	-	P06782-P06782-EXP-3hyh.pdb3-B-0-A-0.pdb
P06782	SNF1_YEAST	YDR477W	P06782	SNF1_YEAST	YDR477W	2	0	Structure	3mn3	2	A	0	93	42.8	50	320	-	A	1	93	42.8	50	320	-	P06782-P06782-EXP-3mn3.pdb2-A-0-A-1.pdb
P06782	SNF1_YEAST	YDR477W	P06782	SNF1_YEAST	YDR477W	3	0	Structure	2fh9	1	A	0	93.1	43.3	46	319	-	A	1	93.1	43.3	46	319	-	P06782-P06782-EXP-2fh9.pdb1-A-0-A-1.pdb
P06782	SNF1_YEAST	YDR477W	P06782	SNF1_YEAST	YDR477W	4	0	Structure	3dae	3	B	0	92.5	42	50	315	-	A	0	92.5	42.3	48	315	-	P06782-P06782-EXP-3dae.pdb3-B-0-A-0.pdb
P21243	PSA1_YEAST	YGL011C	P40303	PSA4_YEAST	YOL038W	1	0	Model	1iru	1	O	0	54.5	96.8	8	251	-	P	0	38.1	92.1	3	236	-	P21243-P40303-MDL-1iru.pdb1-O-0-P-0.pdb
P21243	PSA1_YEAST	YGL011C	P40303	PSA4_YEAST	YOL038W	2	0	Model	1iru	1	A	0	54.5	96.8	8	251	-	B	0	38.1	92.1	3	236	-	P21243-P40303-MDL-1iru.pdb1-A-0-B-0.pdb
P21243	PSA1_YEAST	YGL011C	P40303	PSA4_YEAST	YOL038W	3	0	Model	1jd2	1	2	0	100	96.4	10	252	-	V	0	38.3	84.6	4	218	-	P21243-P40303-MDL-1jd2.pdb1-2-0-V-0.pdb
P21242	PSA7_YEAST	YOR362C	P21243	PSA1_YEAST	YGL011C	1	0	Structure	1ryp	1	U	0	100	84.7	5	248	-	O	0	100	96.4	10	252	-	P21242-P21243-EXP-1ryp.pdb1-U-0-O-0.pdb
P21242	PSA7_YEAST	YOR362C	P21243	PSA1_YEAST	YGL011C	2	0	Structure	1ryp	1	G	0	100	84.7	5	248	-	A	0	100	96.4	10	252	-	P21242-P21243-EXP-1ryp.pdb1-G-0-A-0.pdb
P21242	PSA7_YEAST	YOR362C	P21243	PSA1_YEAST	YGL011C	3	0	Structure	1g65	1	F	0	100	84.7	5	248	-	G	0	100	96.4	10	252	-	P21242-P21243-EXP-1g65.pdb1-F-0-G-0.pdb
P21242	PSA7_YEAST	YOR362C	P21243	PSA1_YEAST	YGL011C	4	0	Structure	1g65	1	T	0	100	84.7	5	248	-	U	0	100	96.4	10	252	-	P21242-P21243-EXP-1g65.pdb1-T-0-U-0.pdb
P21242	PSA7_YEAST	YOR362C	P21243	PSA1_YEAST	YGL011C	5	0	Structure	3nzj	1	T	0	100	84.7	5	248	-	U	0	100	96.4	10	252	-	P21242-P21243-EXP-3nzj.pdb1-T-0-U-0.pdb
P21242	PSA7_YEAST	YOR362C	P21243	PSA1_YEAST	YGL011C	6	0	Structure	3nzj	1	F	0	100	84.7	5	248	-	G	0	100	96.4	10	252	-	P21242-P21243-EXP-3nzj.pdb1-F-0-G-0.pdb
P21242	PSA7_YEAST	YOR362C	P21243	PSA1_YEAST	YGL011C	7	0	Structure	1g0u	1	T	0	100	84	7	248	-	U	0	100	95.2	13	252	-	P21242-P21243-EXP-1g0u.pdb1-T-0-U-0.pdb
P21242	PSA7_YEAST	YOR362C	P21243	PSA1_YEAST	YGL011C	8	0	Structure	1g0u	1	F	0	100	84	7	248	-	G	0	100	95.2	13	252	-	P21242-P21243-EXP-1g0u.pdb1-F-0-G-0.pdb
P21242	PSA7_YEAST	YOR362C	P21243	PSA1_YEAST	YGL011C	9	0	Structure	3gpt	1	F	0	100	84.7	5	248	-	G	0	100	96.4	10	252	-	P21242-P21243-EXP-3gpt.pdb1-F-0-G-0.pdb
P21242	PSA7_YEAST	YOR362C	P21243	PSA1_YEAST	YGL011C	10	0	Structure	3gpt	1	T	0	100	84.7	5	248	-	U	0	100	96.4	10	252	-	P21242-P21243-EXP-3gpt.pdb1-T-0-U-0.pdb
P21242	PSA7_YEAST	YOR362C	P21243	PSA1_YEAST	YGL011C	11	0	Structure	4g4s	1	G	1	100	85.4	1	246	-	A	1	100	95.6	12	252	-	P21242-P21243-EXP-4g4s.pdb1-G-1-A-1.pdb
P21242	PSA7_YEAST	YOR362C	P21243	PSA1_YEAST	YGL011C	12	0	Structure	4g4s	1	G	0	100	85.4	1	246	-	A	0	100	95.6	12	252	-	P21242-P21243-EXP-4g4s.pdb1-G-0-A-0.pdb
P21242	PSA7_YEAST	YOR362C	P21243	PSA1_YEAST	YGL011C	13	0	Structure	3gpw	1	T	0	100	84.7	5	248	-	U	0	100	96.4	10	252	-	P21242-P21243-EXP-3gpw.pdb1-T-0-U-0.pdb
P21242	PSA7_YEAST	YOR362C	P21243	PSA1_YEAST	YGL011C	14	0	Structure	3hye	1	T	0	100	84.7	5	248	-	U	0	100	96.4	10	252	-	P21242-P21243-EXP-3hye.pdb1-T-0-U-0.pdb
P21242	PSA7_YEAST	YOR362C	P21243	PSA1_YEAST	YGL011C	15	0	Structure	3nzw	1	T	0	100	84.7	5	248	-	U	0	100	96.4	10	252	-	P21242-P21243-EXP-3nzw.pdb1-T-0-U-0.pdb
P21242	PSA7_YEAST	YOR362C	P21243	PSA1_YEAST	YGL011C	16	0	Structure	3nzw	1	F	0	100	84.7	5	248	-	G	0	100	96.4	10	252	-	P21242-P21243-EXP-3nzw.pdb1-F-0-G-0.pdb
P21242	PSA7_YEAST	YOR362C	P21243	PSA1_YEAST	YGL011C	17	0	Structure	3gpw	1	F	0	100	84.7	5	248	-	G	0	100	96.4	10	252	-	P21242-P21243-EXP-3gpw.pdb1-F-0-G-0.pdb
P21242	PSA7_YEAST	YOR362C	P21243	PSA1_YEAST	YGL011C	18	0	Structure	3hye	1	F	0	100	84.7	5	248	-	G	0	100	96.4	10	252	-	P21242-P21243-EXP-3hye.pdb1-F-0-G-0.pdb
P21242	PSA7_YEAST	YOR362C	P21243	PSA1_YEAST	YGL011C	19	0	Structure	4eu2	1	G	0	100	84.7	5	248	-	A	0	100	95.6	10	250	-	P21242-P21243-EXP-4eu2.pdb1-G-0-A-0.pdb
P21242	PSA7_YEAST	YOR362C	P21243	PSA1_YEAST	YGL011C	20	0	Structure	4eu2	1	U	0	100	84.7	5	248	-	O	0	100	95.6	10	250	-	P21242-P21243-EXP-4eu2.pdb1-U-0-O-0.pdb
P21242	PSA7_YEAST	YOR362C	P21243	PSA1_YEAST	YGL011C	21	0	Structure	3mg8	1	F	0	100	82.3	12	248	-	G	0	100	96.4	10	252	-	P21242-P21243-EXP-3mg8.pdb1-F-0-G-0.pdb
P21242	PSA7_YEAST	YOR362C	P21243	PSA1_YEAST	YGL011C	22	0	Structure	3mg8	1	T	0	100	82.3	12	248	-	U	0	100	96.4	10	252	-	P21242-P21243-EXP-3mg8.pdb1-T-0-U-0.pdb
P21242	PSA7_YEAST	YOR362C	P21243	PSA1_YEAST	YGL011C	23	0	Structure	3d29	1	F	0	100	84.7	5	248	-	G	0	100	96.4	10	252	-	P21242-P21243-EXP-3d29.pdb1-F-0-G-0.pdb
P21242	PSA7_YEAST	YOR362C	P21243	PSA1_YEAST	YGL011C	24	0	Structure	3d29	1	T	0	100	84.7	5	248	-	U	0	100	96.4	10	252	-	P21242-P21243-EXP-3d29.pdb1-T-0-U-0.pdb
P21242	PSA7_YEAST	YOR362C	P21243	PSA1_YEAST	YGL011C	25	0	Structure	3oeu	1	T	0	100	82.3	12	248	-	U	0	100	96.4	10	252	-	P21242-P21243-EXP-3oeu.pdb1-T-0-U-0.pdb
P21242	PSA7_YEAST	YOR362C	P21243	PSA1_YEAST	YGL011C	26	0	Structure	3oeu	1	F	0	100	82.3	12	248	-	G	0	100	96.4	10	252	-	P21242-P21243-EXP-3oeu.pdb1-F-0-G-0.pdb
P21242	PSA7_YEAST	YOR362C	P21243	PSA1_YEAST	YGL011C	27	0	Structure	3mg6	1	T	0	100	82.3	12	248	-	U	0	100	96.4	10	252	-	P21242-P21243-EXP-3mg6.pdb1-T-0-U-0.pdb
P21242	PSA7_YEAST	YOR362C	P21243	PSA1_YEAST	YGL011C	28	0	Structure	3mg6	1	F	0	100	82.3	12	248	-	G	0	100	96.4	10	252	-	P21242-P21243-EXP-3mg6.pdb1-F-0-G-0.pdb
P21242	PSA7_YEAST	YOR362C	P21243	PSA1_YEAST	YGL011C	29	0	Structure	3sdi	1	F	0	100	84	7	248	-	G	0	100	95.2	13	252	-	P21242-P21243-EXP-3sdi.pdb1-F-0-G-0.pdb
P21242	PSA7_YEAST	YOR362C	P21243	PSA1_YEAST	YGL011C	30	0	Structure	3sdi	1	T	0	100	84	7	248	-	U	0	100	95.2	13	252	-	P21242-P21243-EXP-3sdi.pdb1-T-0-U-0.pdb
P21242	PSA7_YEAST	YOR362C	P21243	PSA1_YEAST	YGL011C	31	0	Structure	3mg0	1	T	0	100	84.7	5	248	-	U	0	100	96.4	10	252	-	P21242-P21243-EXP-3mg0.pdb1-T-0-U-0.pdb
P21242	PSA7_YEAST	YOR362C	P21243	PSA1_YEAST	YGL011C	32	0	Structure	3mg0	1	F	0	100	84.7	5	248	-	G	0	100	96.4	10	252	-	P21242-P21243-EXP-3mg0.pdb1-F-0-G-0.pdb
P21242	PSA7_YEAST	YOR362C	P21243	PSA1_YEAST	YGL011C	33	0	Structure	3gpj	1	F	0	100	84.7	5	248	-	G	0	100	96.4	10	252	-	P21242-P21243-EXP-3gpj.pdb1-F-0-G-0.pdb
P21242	PSA7_YEAST	YOR362C	P21243	PSA1_YEAST	YGL011C	34	0	Structure	3bdm	1	T	0	100	84.7	5	248	-	U	0	100	96.4	10	252	-	P21242-P21243-EXP-3bdm.pdb1-T-0-U-0.pdb
P21242	PSA7_YEAST	YOR362C	P21243	PSA1_YEAST	YGL011C	35	0	Structure	3un8	1	F	0	100	84.7	5	248	-	G	0	100	96.4	10	252	-	P21242-P21243-EXP-3un8.pdb1-F-0-G-0.pdb
P21242	PSA7_YEAST	YOR362C	P21243	PSA1_YEAST	YGL011C	36	0	Structure	3tdd	1	T	0	100	84.7	5	248	-	U	0	100	96.4	10	252	-	P21242-P21243-EXP-3tdd.pdb1-T-0-U-0.pdb
P21242	PSA7_YEAST	YOR362C	P21243	PSA1_YEAST	YGL011C	37	0	Structure	3okj	1	F	0	100	84.7	5	248	-	G	0	100	96.4	10	252	-	P21242-P21243-EXP-3okj.pdb1-F-0-G-0.pdb
P21242	PSA7_YEAST	YOR362C	P21243	PSA1_YEAST	YGL011C	38	0	Structure	3nzx	1	F	0	100	84.7	5	248	-	G	0	100	96.4	10	252	-	P21242-P21243-EXP-3nzx.pdb1-F-0-G-0.pdb
P21242	PSA7_YEAST	YOR362C	P21243	PSA1_YEAST	YGL011C	39	0	Structure	3okj	1	T	0	100	84.7	5	248	-	U	0	100	96.4	10	252	-	P21242-P21243-EXP-3okj.pdb1-T-0-U-0.pdb
P21242	PSA7_YEAST	YOR362C	P21243	PSA1_YEAST	YGL011C	40	0	Structure	3un8	1	T	0	100	84.7	5	248	-	U	0	100	96.4	10	252	-	P21242-P21243-EXP-3un8.pdb1-T-0-U-0.pdb
P21242	PSA7_YEAST	YOR362C	P21243	PSA1_YEAST	YGL011C	41	0	Structure	3tdd	1	F	0	100	84.7	5	248	-	G	0	100	96.4	10	252	-	P21242-P21243-EXP-3tdd.pdb1-F-0-G-0.pdb
P21242	PSA7_YEAST	YOR362C	P21243	PSA1_YEAST	YGL011C	42	0	Structure	4inr	1	T	0	100	84.7	5	248	-	U	0	100	96.4	10	252	-	P21242-P21243-EXP-4inr.pdb1-T-0-U-0.pdb
P21242	PSA7_YEAST	YOR362C	P21243	PSA1_YEAST	YGL011C	43	0	Structure	3gpj	1	T	0	100	84.7	5	248	-	U	0	100	96.4	10	252	-	P21242-P21243-EXP-3gpj.pdb1-T-0-U-0.pdb
P21242	PSA7_YEAST	YOR362C	P21243	PSA1_YEAST	YGL011C	44	0	Structure	3bdm	1	F	0	100	84.7	5	248	-	G	0	100	96.4	10	252	-	P21242-P21243-EXP-3bdm.pdb1-F-0-G-0.pdb
P21242	PSA7_YEAST	YOR362C	P21243	PSA1_YEAST	YGL011C	45	0	Structure	3nzx	1	T	0	100	84.7	5	248	-	U	0	100	96.4	10	252	-	P21242-P21243-EXP-3nzx.pdb1-T-0-U-0.pdb
P21242	PSA7_YEAST	YOR362C	P21243	PSA1_YEAST	YGL011C	46	0	Structure	4inr	1	F	0	100	84.7	5	248	-	G	0	100	96.4	10	252	-	P21242-P21243-EXP-4inr.pdb1-F-0-G-0.pdb
P21242	PSA7_YEAST	YOR362C	P21243	PSA1_YEAST	YGL011C	47	0	Structure	3sdk	1	F	0	100	81.9	13	248	-	G	0	100	96.4	10	252	-	P21242-P21243-EXP-3sdk.pdb1-F-0-G-0.pdb
P21242	PSA7_YEAST	YOR362C	P21243	PSA1_YEAST	YGL011C	48	0	Structure	3sdk	1	T	0	100	81.9	13	248	-	U	0	100	96.4	10	252	-	P21242-P21243-EXP-3sdk.pdb1-T-0-U-0.pdb
P21242	PSA7_YEAST	YOR362C	P21243	PSA1_YEAST	YGL011C	49	0	Structure	3mg7	1	F	0	100	82.3	12	248	-	G	0	100	96.4	10	252	-	P21242-P21243-EXP-3mg7.pdb1-F-0-G-0.pdb
P21242	PSA7_YEAST	YOR362C	P21243	PSA1_YEAST	YGL011C	50	0	Structure	3mg7	1	T	0	100	82.3	12	248	-	U	0	100	96.4	10	252	-	P21242-P21243-EXP-3mg7.pdb1-T-0-U-0.pdb
P21242	PSA7_YEAST	YOR362C	P21243	PSA1_YEAST	YGL011C	51	0	Structure	2f16	1	F	0	100	84.7	5	248	-	G	0	100	96.4	10	252	-	P21242-P21243-EXP-2f16.pdb1-F-0-G-0.pdb
P21242	PSA7_YEAST	YOR362C	P21243	PSA1_YEAST	YGL011C	52	0	Structure	3shj	1	T	0	100	84.7	5	248	-	U	0	100	96.4	10	252	-	P21242-P21243-EXP-3shj.pdb1-T-0-U-0.pdb
P21242	PSA7_YEAST	YOR362C	P21243	PSA1_YEAST	YGL011C	53	0	Structure	2fak	1	T	0	100	84.7	5	248	-	U	0	100	96.4	10	252	-	P21242-P21243-EXP-2fak.pdb1-T-0-U-0.pdb
P21242	PSA7_YEAST	YOR362C	P21243	PSA1_YEAST	YGL011C	54	0	Structure	2f16	1	T	0	100	84.7	5	248	-	U	0	100	96.4	10	252	-	P21242-P21243-EXP-2f16.pdb1-T-0-U-0.pdb
P21242	PSA7_YEAST	YOR362C	P21243	PSA1_YEAST	YGL011C	55	0	Structure	4jsq	1	F	0	100	84.7	5	248	-	G	0	100	96.4	10	252	-	P21242-P21243-EXP-4jsq.pdb1-F-0-G-0.pdb
P21242	PSA7_YEAST	YOR362C	P21243	PSA1_YEAST	YGL011C	56	0	Structure	4gk7	1	F	0	100	84.7	5	248	-	G	0	100	96.4	10	252	-	P21242-P21243-EXP-4gk7.pdb1-F-0-G-0.pdb
P21242	PSA7_YEAST	YOR362C	P21243	PSA1_YEAST	YGL011C	57	0	Structure	4jsq	1	T	0	100	84.7	5	248	-	U	0	100	96.4	10	252	-	P21242-P21243-EXP-4jsq.pdb1-T-0-U-0.pdb
P21242	PSA7_YEAST	YOR362C	P21243	PSA1_YEAST	YGL011C	58	0	Structure	4fzc	1	T	0	100	84.7	5	248	-	U	0	100	96.4	10	252	-	P21242-P21243-EXP-4fzc.pdb1-T-0-U-0.pdb
P21242	PSA7_YEAST	YOR362C	P21243	PSA1_YEAST	YGL011C	59	0	Structure	2fak	1	F	0	100	84.7	5	248	-	G	0	100	96.4	10	252	-	P21242-P21243-EXP-2fak.pdb1-F-0-G-0.pdb
P21242	PSA7_YEAST	YOR362C	P21243	PSA1_YEAST	YGL011C	60	0	Structure	3shj	1	F	0	100	84.7	5	248	-	G	0	100	96.4	10	252	-	P21242-P21243-EXP-3shj.pdb1-F-0-G-0.pdb
P21242	PSA7_YEAST	YOR362C	P21243	PSA1_YEAST	YGL011C	61	0	Structure	3dy4	1	T	0	100	84.7	5	248	-	U	0	100	96.4	10	252	-	P21242-P21243-EXP-3dy4.pdb1-T-0-U-0.pdb
P21242	PSA7_YEAST	YOR362C	P21243	PSA1_YEAST	YGL011C	62	0	Structure	4j70	1	F	0	100	84.7	5	248	-	G	0	100	96.4	10	252	-	P21242-P21243-EXP-4j70.pdb1-F-0-G-0.pdb
P21242	PSA7_YEAST	YOR362C	P21243	PSA1_YEAST	YGL011C	63	0	Structure	4j70	1	T	0	100	84.7	5	248	-	U	0	100	96.4	10	252	-	P21242-P21243-EXP-4j70.pdb1-T-0-U-0.pdb
P21242	PSA7_YEAST	YOR362C	P21243	PSA1_YEAST	YGL011C	64	0	Structure	3dy4	1	F	0	100	84.7	5	248	-	G	0	100	96.4	10	252	-	P21242-P21243-EXP-3dy4.pdb1-F-0-G-0.pdb
P21242	PSA7_YEAST	YOR362C	P21243	PSA1_YEAST	YGL011C	65	0	Structure	4fzc	1	F	0	100	84.7	5	248	-	G	0	100	96.4	10	252	-	P21242-P21243-EXP-4fzc.pdb1-F-0-G-0.pdb
P21242	PSA7_YEAST	YOR362C	P21243	PSA1_YEAST	YGL011C	66	0	Structure	4gk7	1	T	0	100	84.7	5	248	-	U	0	100	96.4	10	252	-	P21242-P21243-EXP-4gk7.pdb1-T-0-U-0.pdb
P21242	PSA7_YEAST	YOR362C	P21243	PSA1_YEAST	YGL011C	67	0	Structure	2gpl	1	F	0	100	84.7	5	248	-	G	0	100	96.4	10	252	-	P21242-P21243-EXP-2gpl.pdb1-F-0-G-0.pdb
P21242	PSA7_YEAST	YOR362C	P21243	PSA1_YEAST	YGL011C	68	0	Structure	2gpl	1	T	0	100	84.7	5	248	-	U	0	100	96.4	10	252	-	P21242-P21243-EXP-2gpl.pdb1-T-0-U-0.pdb
P21242	PSA7_YEAST	YOR362C	P21243	PSA1_YEAST	YGL011C	69	0	Structure	3dy3	1	F	0	100	84.7	5	248	-	G	0	100	96.4	10	252	-	P21242-P21243-EXP-3dy3.pdb1-F-0-G-0.pdb
P21242	PSA7_YEAST	YOR362C	P21243	PSA1_YEAST	YGL011C	70	0	Structure	3dy3	1	T	0	100	84.7	5	248	-	U	0	100	96.4	10	252	-	P21242-P21243-EXP-3dy3.pdb1-T-0-U-0.pdb
P21242	PSA7_YEAST	YOR362C	P21243	PSA1_YEAST	YGL011C	71	0	Structure	3oev	1	T	0	100	82.3	12	248	-	U	0	100	96.4	10	252	-	P21242-P21243-EXP-3oev.pdb1-T-0-U-0.pdb
P21242	PSA7_YEAST	YOR362C	P21243	PSA1_YEAST	YGL011C	72	0	Structure	3oev	1	F	0	100	82.3	12	248	-	G	0	100	96.4	10	252	-	P21242-P21243-EXP-3oev.pdb1-F-0-G-0.pdb
P21242	PSA7_YEAST	YOR362C	P21243	PSA1_YEAST	YGL011C	73	0	Structure	2zcy	1	T	0	100	84.7	5	248	-	U	0	100	96.4	10	252	-	P21242-P21243-EXP-2zcy.pdb1-T-0-U-0.pdb
P21242	PSA7_YEAST	YOR362C	P21243	PSA1_YEAST	YGL011C	74	0	Structure	4int	1	T	0	100	84.7	5	248	-	U	0	100	96.4	10	252	-	P21242-P21243-EXP-4int.pdb1-T-0-U-0.pdb
P21242	PSA7_YEAST	YOR362C	P21243	PSA1_YEAST	YGL011C	75	0	Structure	4jsu	1	F	0	100	84.7	5	248	-	G	0	100	96.4	10	252	-	P21242-P21243-EXP-4jsu.pdb1-F-0-G-0.pdb
P21242	PSA7_YEAST	YOR362C	P21243	PSA1_YEAST	YGL011C	76	0	Structure	4int	1	F	0	100	84.7	5	248	-	G	0	100	96.4	10	252	-	P21242-P21243-EXP-4int.pdb1-F-0-G-0.pdb
P21242	PSA7_YEAST	YOR362C	P21243	PSA1_YEAST	YGL011C	77	0	Structure	2zcy	1	F	0	100	84.7	5	248	-	G	0	100	96.4	10	252	-	P21242-P21243-EXP-2zcy.pdb1-F-0-G-0.pdb
P21242	PSA7_YEAST	YOR362C	P21243	PSA1_YEAST	YGL011C	78	0	Structure	4jsu	1	T	0	100	84.7	5	248	-	U	0	100	96.4	10	252	-	P21242-P21243-EXP-4jsu.pdb1-T-0-U-0.pdb
P21242	PSA7_YEAST	YOR362C	P21243	PSA1_YEAST	YGL011C	79	0	Structure	1jd2	1	F	0	100	84.7	5	248	-	G	0	100	96.4	10	252	-	P21242-P21243-EXP-1jd2.pdb1-F-0-G-0.pdb
P21242	PSA7_YEAST	YOR362C	P21243	PSA1_YEAST	YGL011C	80	0	Structure	3e47	1	T	0	100	84.7	5	248	-	U	0	100	96.4	10	252	-	P21242-P21243-EXP-3e47.pdb1-T-0-U-0.pdb
P21242	PSA7_YEAST	YOR362C	P21243	PSA1_YEAST	YGL011C	81	0	Structure	4fzg	1	T	0	100	84.7	5	248	-	U	0	100	96.4	10	252	-	P21242-P21243-EXP-4fzg.pdb1-T-0-U-0.pdb
P21242	PSA7_YEAST	YOR362C	P21243	PSA1_YEAST	YGL011C	82	0	Structure	4fzg	1	F	0	100	84.7	5	248	-	G	0	100	96.4	10	252	-	P21242-P21243-EXP-4fzg.pdb1-F-0-G-0.pdb
P21242	PSA7_YEAST	YOR362C	P21243	PSA1_YEAST	YGL011C	83	0	Structure	1jd2	1	1	0	100	84.7	5	248	-	2	0	100	96.4	10	252	-	P21242-P21243-EXP-1jd2.pdb1-1-0-2-0.pdb
P21242	PSA7_YEAST	YOR362C	P21243	PSA1_YEAST	YGL011C	84	0	Structure	3e47	1	F	0	100	84.7	5	248	-	G	0	100	96.4	10	252	-	P21242-P21243-EXP-3e47.pdb1-F-0-G-0.pdb
P21242	PSA7_YEAST	YOR362C	P21243	PSA1_YEAST	YGL011C	85	0	Structure	3l5q	1	X	0	100	84.7	5	248	-	C	0	100	96.4	10	252	-	P21242-P21243-EXP-3l5q.pdb1-X-0-C-0.pdb
P21242	PSA7_YEAST	YOR362C	P21243	PSA1_YEAST	YGL011C	86	0	Structure	1vsy	1	G	0	100	84.7	5	248	-	A	0	100	96.4	10	252	-	P21242-P21243-EXP-1vsy.pdb1-G-0-A-0.pdb
P21242	PSA7_YEAST	YOR362C	P21243	PSA1_YEAST	YGL011C	87	0	Structure	3l5q	1	L	0	100	84.7	5	248	-	A	0	100	96.4	10	252	-	P21242-P21243-EXP-3l5q.pdb1-L-0-A-0.pdb
P21242	PSA7_YEAST	YOR362C	P21243	PSA1_YEAST	YGL011C	88	0	Structure	1vsy	1	U	0	100	84.7	5	248	-	O	0	100	96.4	10	252	-	P21242-P21243-EXP-1vsy.pdb1-U-0-O-0.pdb
P21242	PSA7_YEAST	YOR362C	P21243	PSA1_YEAST	YGL011C	89	0	Structure	4jt0	1	F	0	100	84.7	5	248	-	G	0	100	96.4	10	252	-	P21242-P21243-EXP-4jt0.pdb1-F-0-G-0.pdb
P21242	PSA7_YEAST	YOR362C	P21243	PSA1_YEAST	YGL011C	90	0	Structure	4inu	1	F	0	100	84.7	5	248	-	G	0	100	96.4	10	252	-	P21242-P21243-EXP-4inu.pdb1-F-0-G-0.pdb
P21242	PSA7_YEAST	YOR362C	P21243	PSA1_YEAST	YGL011C	91	0	Structure	4inu	1	T	0	100	84.7	5	248	-	U	0	100	96.4	10	252	-	P21242-P21243-EXP-4inu.pdb1-T-0-U-0.pdb
P21242	PSA7_YEAST	YOR362C	P21243	PSA1_YEAST	YGL011C	92	0	Structure	4jt0	1	T	0	100	84.7	5	248	-	U	0	100	96.4	10	252	-	P21242-P21243-EXP-4jt0.pdb1-T-0-U-0.pdb
P21242	PSA7_YEAST	YOR362C	P21243	PSA1_YEAST	YGL011C	93	0	Structure	3mg4	1	T	0	100	84.7	5	248	-	U	0	100	96.4	10	252	-	P21242-P21243-EXP-3mg4.pdb1-T-0-U-0.pdb
P21242	PSA7_YEAST	YOR362C	P21243	PSA1_YEAST	YGL011C	94	0	Structure	3mg4	1	F	0	100	84.7	5	248	-	G	0	100	96.4	10	252	-	P21242-P21243-EXP-3mg4.pdb1-F-0-G-0.pdb
P21242	PSA7_YEAST	YOR362C	P21243	PSA1_YEAST	YGL011C	95	0	Structure	1fnt	1	G	0	100	83.3	9	248	-	A	0	100	94.4	15	252	-	P21242-P21243-EXP-1fnt.pdb1-G-0-A-0.pdb
P21242	PSA7_YEAST	YOR362C	P21243	PSA1_YEAST	YGL011C	96	0	Structure	1fnt	1	U	0	100	83.3	9	248	-	O	0	100	94.4	15	252	-	P21242-P21243-EXP-1fnt.pdb1-U-0-O-0.pdb
P21242	PSA7_YEAST	YOR362C	P21243	PSA1_YEAST	YGL011C	97	0	Structure	1z7q	1	U	0	100	84.4	6	248	-	O	0	100	96.4	10	252	-	P21242-P21243-EXP-1z7q.pdb1-U-0-O-0.pdb
P21242	PSA7_YEAST	YOR362C	P21243	PSA1_YEAST	YGL011C	98	0	Structure	1z7q	1	G	0	100	84.4	6	248	-	A	0	100	96.4	10	252	-	P21242-P21243-EXP-1z7q.pdb1-G-0-A-0.pdb
P21242	PSA7_YEAST	YOR362C	P21243	PSA1_YEAST	YGL011C	99	0	Structure	3un4	1	T	0	100	84.7	5	248	-	U	0	100	96.4	10	252	-	P21242-P21243-EXP-3un4.pdb1-T-0-U-0.pdb
P21242	PSA7_YEAST	YOR362C	P21243	PSA1_YEAST	YGL011C	100	0	Structure	3un4	1	F	0	100	84.7	5	248	-	G	0	100	96.4	10	252	-	P21242-P21243-EXP-3un4.pdb1-F-0-G-0.pdb
P21242	PSA7_YEAST	YOR362C	P21243	PSA1_YEAST	YGL011C	101	0	Structure	4b4t	1	G	0	100	84.7	5	248	-	A	0	100	96.4	10	252	-	P21242-P21243-EXP-4b4t.pdb1-G-0-A-0.pdb
P21242	PSA7_YEAST	YOR362C	P21243	PSA1_YEAST	YGL011C	102	0	Structure	4bgr	1	G	0	100	85.4	5	250	-	A	0	100	96.4	10	252	-	P21242-P21243-EXP-4bgr.pdb1-G-0-A-0.pdb
P21242	PSA7_YEAST	YOR362C	P40303	PSA4_YEAST	YOL038W	1	0	Model	4g4s	1	C	0	34.4	67	8	200	-	D	0	96.1	90.2	9	237	-	P21242-P40303-MDL-4g4s.pdb1-C-0-D-0.pdb
P21242	PSA7_YEAST	YOR362C	P40303	PSA4_YEAST	YOL038W	2	0	Model	4g4s	1	C	1	34.4	67	8	200	-	D	1	96.1	90.2	9	237	-	P21242-P40303-MDL-4g4s.pdb1-C-1-D-1.pdb
P21242	PSA7_YEAST	YOR362C	P40303	PSA4_YEAST	YOL038W	3	0	Model	3unh	1	B	0	32.6	76	8	226	-	C	0	59	94.1	4	242	-	P21242-P40303-MDL-3unh.pdb1-B-0-C-0.pdb
P21243	PSA1_YEAST	YGL011C	P21243	PSA1_YEAST	YGL011C	1	0	Model	1iru	1	B	0	30.4	94.8	11	249	-	A	0	54.5	96.8	8	251	-	P21243-P21243-MDL-1iru.pdb1-B-0-A-0.pdb
P21243	PSA1_YEAST	YGL011C	P21243	PSA1_YEAST	YGL011C	2	0	Model	1iru	1	P	0	30.4	94.8	11	249	-	O	0	54.5	96.8	8	251	-	P21243-P21243-MDL-1iru.pdb1-P-0-O-0.pdb
P21243	PSA1_YEAST	YGL011C	P21243	PSA1_YEAST	YGL011C	3	0	Model	3une	2	i	0	54.5	96.8	8	251	-	c	0	30.4	94.8	11	249	-	P21243-P21243-MDL-3une.pdb2-i-0-c-0.pdb
P40303	PSA4_YEAST	YOL038W	P40303	PSA4_YEAST	YOL038W	1	0	Model	1j2p	1	B	0	44.9	94.5	3	242	-	A	0	44.9	94.5	3	242	-	P40303-P40303-MDL-1j2p.pdb1-B-0-A-0.pdb
P40303	PSA4_YEAST	YOL038W	P40303	PSA4_YEAST	YOL038W	2	0	Model	1j2p	1	D	0	44.9	94.5	3	242	-	E	0	44.9	94.5	3	242	-	P40303-P40303-MDL-1j2p.pdb1-D-0-E-0.pdb
P40303	PSA4_YEAST	YOL038W	P40303	PSA4_YEAST	YOL038W	3	0	Model	1j2p	1	B	0	44.9	94.5	3	242	-	C	0	44.9	94.5	3	242	-	P40303-P40303-MDL-1j2p.pdb1-B-0-C-0.pdb
P21242	PSA7_YEAST	YOR362C	P21242	PSA7_YEAST	YOR362C	1	0	Model	1jd2	1	Z	0	33.2	66.3	8	198	-	1	0	100	84.7	5	248	-	P21242-P21242-MDL-1jd2.pdb1-Z-0-1-0.pdb
P21242	PSA7_YEAST	YOR362C	P21242	PSA7_YEAST	YOR362C	2	0	Model	4jt0	1	T	0	100	84.7	5	248	-	S	0	33.2	66.3	8	198	-	P21242-P21242-MDL-4jt0.pdb1-T-0-S-0.pdb
P21242	PSA7_YEAST	YOR362C	P21242	PSA7_YEAST	YOR362C	3	0	Model	4inu	1	F	0	100	84.7	5	248	-	E	0	33.2	66.3	8	198	-	P21242-P21242-MDL-4inu.pdb1-F-0-E-0.pdb
P32795	YME1_YEAST	YPR024W	P39925	AFG3_YEAST	YER017C	1	0	Model	3kds	2	F	2	45.8	57.4	278	706	-	G	2	48.5	58.6	284	729	-	P32795-P39925-MDL-3kds.pdb2-F-2-G-2.pdb
P32795	YME1_YEAST	YPR024W	P39925	AFG3_YEAST	YER017C	2	0	Model	3kds	1	E	2	45.8	57.4	278	706	-	E	3	48.5	58.6	284	729	-	P32795-P39925-MDL-3kds.pdb1-E-2-E-3.pdb
P32795	YME1_YEAST	YPR024W	P39925	AFG3_YEAST	YER017C	3	0	Model	3kds	2	G	0	45.8	57.4	278	706	-	F	0	48.5	58.6	284	729	-	P32795-P39925-MDL-3kds.pdb2-G-0-F-0.pdb
P32795	YME1_YEAST	YPR024W	P32795	YME1_YEAST	YPR024W	1	0	Model	3kds	1	E	0	45.8	57.4	278	706	-	E	4	45.8	57.4	278	706	-	P32795-P32795-MDL-3kds.pdb1-E-0-E-4.pdb
P32795	YME1_YEAST	YPR024W	P32795	YME1_YEAST	YPR024W	2	0	Model	3kds	1	E	1	45.8	57.4	278	706	-	E	3	45.8	57.4	278	706	-	P32795-P32795-MDL-3kds.pdb1-E-1-E-3.pdb
P32795	YME1_YEAST	YPR024W	P32795	YME1_YEAST	YPR024W	3	0	Model	3kds	2	F	1	45.8	57.4	278	706	-	G	1	45.8	57.4	278	706	-	P32795-P32795-MDL-3kds.pdb2-F-1-G-1.pdb
P16658	SEN2_YEAST	YLR105C	P16658	SEN2_YEAST	YLR105C	1	0	Dom_dom_model	2zyz	-	A	-	8.5	19.9	262	336	tRNA_int_endo	B	-	31	20.7	259	336	tRNA_int_endo	P16658-P16658-MDD-tRNA_int_endo-tRNA_int_endo-2zyz-A-3-79-B-90-175.pdb
P00358	G3P2_YEAST	YJR009C	P00360	G3P1_YEAST	YJL052W	1	0	Model	3pym	1	A	1	96.4	100	1	332	-	A	0	88.3	100	1	332	-	P00358-P00360-MDL-3pym.pdb1-A-1-A-0.pdb
P00358	G3P2_YEAST	YJR009C	P00360	G3P1_YEAST	YJL052W	2	0	Model	3pym	1	A	0	96.4	100	1	332	-	A	1	88.3	100	1	332	-	P00358-P00360-MDL-3pym.pdb1-A-0-A-1.pdb
P00358	G3P2_YEAST	YJR009C	P00360	G3P1_YEAST	YJL052W	3	0	Model	3pym	1	B	0	96.4	99.7	2	332	-	A	1	88.3	100	1	332	-	P00358-P00360-MDL-3pym.pdb1-B-0-A-1.pdb
P00360	G3P1_YEAST	YJL052W	P00360	G3P1_YEAST	YJL052W	1	0	Model	3pym	1	A	0	88.3	100	1	332	-	A	1	88.3	100	1	332	-	P00360-P00360-MDL-3pym.pdb1-A-0-A-1.pdb
P00360	G3P1_YEAST	YJL052W	P00360	G3P1_YEAST	YJL052W	2	0	Model	3pym	1	B	0	88.2	99.7	2	332	-	A	1	88.3	100	1	332	-	P00360-P00360-MDL-3pym.pdb1-B-0-A-1.pdb
P00360	G3P1_YEAST	YJL052W	P00360	G3P1_YEAST	YJL052W	3	0	Model	3pym	1	B	1	88.2	99.7	2	332	-	A	0	88.3	100	1	332	-	P00360-P00360-MDL-3pym.pdb1-B-1-A-0.pdb
P00358	G3P2_YEAST	YJR009C	P00358	G3P2_YEAST	YJR009C	1	0	Model	3pym	1	A	0	96.4	100	1	332	-	A	1	96.4	100	1	332	-	P00358-P00358-MDL-3pym.pdb1-A-0-A-1.pdb
P00358	G3P2_YEAST	YJR009C	P00358	G3P2_YEAST	YJR009C	2	0	Model	3pym	1	B	1	96.4	99.7	2	332	-	A	0	96.4	100	1	332	-	P00358-P00358-MDL-3pym.pdb1-B-1-A-0.pdb
P00358	G3P2_YEAST	YJR009C	P00358	G3P2_YEAST	YJR009C	3	0	Model	3pym	1	B	1	96.4	99.7	2	332	-	A	1	96.4	100	1	332	-	P00358-P00358-MDL-3pym.pdb1-B-1-A-1.pdb
P36017	VPS21_YEAST	YOR089C	P36017	VPS21_YEAST	YOR089C	1	0	Model	2hei	1	B	0	61.3	80	5	172	-	A	0	61.3	80	5	172	-	P36017-P36017-MDL-2hei.pdb1-B-0-A-0.pdb
P36017	VPS21_YEAST	YOR089C	P36017	VPS21_YEAST	YOR089C	2	0	Model	1tu4	5	C	1	59.5	80	5	172	-	A	0	59.5	80	5	172	-	P36017-P36017-MDL-1tu4.pdb5-C-1-A-0.pdb
P36017	VPS21_YEAST	YOR089C	P36017	VPS21_YEAST	YOR089C	3	0	Model	1tu4	5	C	0	59.5	80	5	172	-	A	1	59.5	80	5	172	-	P36017-P36017-MDL-1tu4.pdb5-C-0-A-1.pdb
P25298	RNA14_YEAST	YMR061W	P25298	RNA14_YEAST	YMR061W	1	0	Model	4eba	1	B	0	49.1	83.3	16	579	-	A	0	45.3	93.9	30	665	-	P25298-P25298-MDL-4eba.pdb1-B-0-A-0.pdb
P25298	RNA14_YEAST	YMR061W	P25298	RNA14_YEAST	YMR061W	2	0	Model	4eba	3	F	0	49.6	81.2	30	579	-	E	0	45.4	93.8	31	665	-	P25298-P25298-MDL-4eba.pdb3-F-0-E-0.pdb
P25298	RNA14_YEAST	YMR061W	P25298	RNA14_YEAST	YMR061W	3	0	Model	4eba	2	D	0	49.6	81.2	30	579	-	C	0	45.3	93.9	30	665	-	P25298-P25298-MDL-4eba.pdb2-D-0-C-0.pdb
P53252	PIL1_YEAST	YGR086C	Q12230	LSP1_YEAST	YPL004C	1	0	Model	3plt	2	C	0	82.2	62.8	52	264	-	C	1	100	62.5	52	264	-	P53252-Q12230-MDL-3plt.pdb2-C-0-C-1.pdb
P53252	PIL1_YEAST	YGR086C	Q12230	LSP1_YEAST	YPL004C	2	0	Model	3plt	2	C	1	82.2	62.8	52	264	-	C	0	100	62.5	52	264	-	P53252-Q12230-MDL-3plt.pdb2-C-1-C-0.pdb
P53252	PIL1_YEAST	YGR086C	Q12230	LSP1_YEAST	YPL004C	3	0	Model	3plt	1	B	0	79.4	63.1	51	264	-	A	0	100	62.8	51	264	-	P53252-Q12230-MDL-3plt.pdb1-B-0-A-0.pdb
Q00955	ACAC_YEAST	YNR016C	Q00955	ACAC_YEAST	YNR016C	1	0	Structure	3k8x	1	A	0	96.1	32.1	1480	2195	-	A	1	96.1	32.1	1480	2195	-	Q00955-Q00955-EXP-3k8x.pdb1-A-0-A-1.pdb
Q00955	ACAC_YEAST	YNR016C	Q00955	ACAC_YEAST	YNR016C	2	0	Structure	3k8x	3	B	1	96.1	31.8	1480	2189	-	A	1	96.1	32.1	1480	2195	-	Q00955-Q00955-EXP-3k8x.pdb3-B-1-A-1.pdb
Q00955	ACAC_YEAST	YNR016C	Q00955	ACAC_YEAST	YNR016C	3	0	Structure	3k8x	3	C	0	96	31.5	1491	2193	-	A	1	96.1	32.1	1480	2195	-	Q00955-Q00955-EXP-3k8x.pdb3-C-0-A-1.pdb
Q00955	ACAC_YEAST	YNR016C	Q00955	ACAC_YEAST	YNR016C	4	0	Structure	3k8x	2	B	0	96.1	31.8	1480	2189	-	C	0	96	31.5	1491	2193	-	Q00955-Q00955-EXP-3k8x.pdb2-B-0-C-0.pdb
Q00955	ACAC_YEAST	YNR016C	Q00955	ACAC_YEAST	YNR016C	5	0	Structure	3tvu	1	A	0	95.9	32.1	1480	2195	-	A	1	95.9	32.1	1480	2195	-	Q00955-Q00955-EXP-3tvu.pdb1-A-0-A-1.pdb
Q00955	ACAC_YEAST	YNR016C	Q00955	ACAC_YEAST	YNR016C	6	0	Structure	3tvu	2	B	0	95.9	31.8	1480	2189	-	C	0	96.3	31.3	1495	2192	-	Q00955-Q00955-EXP-3tvu.pdb2-B-0-C-0.pdb
Q00955	ACAC_YEAST	YNR016C	Q00955	ACAC_YEAST	YNR016C	7	0	Structure	3h0s	1	A	0	96.8	32.1	1480	2195	-	A	1	96.8	32.1	1480	2195	-	Q00955-Q00955-EXP-3h0s.pdb1-A-0-A-1.pdb
Q00955	ACAC_YEAST	YNR016C	Q00955	ACAC_YEAST	YNR016C	8	0	Structure	3h0s	2	B	0	95.4	31.8	1480	2189	-	C	0	95.3	31.4	1492	2192	-	Q00955-Q00955-EXP-3h0s.pdb2-B-0-C-0.pdb
Q00955	ACAC_YEAST	YNR016C	Q00955	ACAC_YEAST	YNR016C	9	0	Structure	1uyr	1	B	0	94.6	32.9	1484	2218	-	A	0	94.7	33	1482	2218	-	Q00955-Q00955-EXP-1uyr.pdb1-B-0-A-0.pdb
Q00955	ACAC_YEAST	YNR016C	Q00955	ACAC_YEAST	YNR016C	10	0	Structure	3h0q	1	A	0	95.4	32	1482	2195	-	A	1	95.4	32	1482	2195	-	Q00955-Q00955-EXP-3h0q.pdb1-A-0-A-1.pdb
Q00955	ACAC_YEAST	YNR016C	Q00955	ACAC_YEAST	YNR016C	11	0	Structure	1uyt	1	A	0	95.4	32	1482	2196	-	A	1	95.4	32	1482	2196	-	Q00955-Q00955-EXP-1uyt.pdb1-A-0-A-1.pdb
Q00955	ACAC_YEAST	YNR016C	Q00955	ACAC_YEAST	YNR016C	12	0	Structure	1uyt	2	B	0	95.3	31.8	1482	2190	-	C	0	95.3	31.3	1492	2190	-	Q00955-Q00955-EXP-1uyt.pdb2-B-0-C-0.pdb
Q00955	ACAC_YEAST	YNR016C	Q00955	ACAC_YEAST	YNR016C	13	0	Structure	3h0q	2	B	0	95.3	31.7	1482	2189	-	C	0	95.3	31.3	1492	2189	-	Q00955-Q00955-EXP-3h0q.pdb2-B-0-C-0.pdb
Q00955	ACAC_YEAST	YNR016C	Q00955	ACAC_YEAST	YNR016C	14	0	Structure	1uyv	1	A	0	79.7	32	1482	2196	-	A	1	79.7	32	1482	2196	-	Q00955-Q00955-EXP-1uyv.pdb1-A-0-A-1.pdb
Q00955	ACAC_YEAST	YNR016C	Q00955	ACAC_YEAST	YNR016C	15	0	Structure	1uyv	2	B	0	77.7	31.8	1482	2190	-	C	0	80.1	31.8	1492	2201	-	Q00955-Q00955-EXP-1uyv.pdb2-B-0-C-0.pdb
Q00955	ACAC_YEAST	YNR016C	Q00955	ACAC_YEAST	YNR016C	16	0	Structure	1od2	1	B	0	97.6	31.2	1495	2190	-	A	0	97.6	32.2	1484	2203	-	Q00955-Q00955-EXP-1od2.pdb1-B-0-A-0.pdb
Q00955	ACAC_YEAST	YNR016C	Q00955	ACAC_YEAST	YNR016C	17	0	Structure	3tz3	1	A	0	95.9	32	1480	2193	-	A	1	95.9	32	1480	2193	-	Q00955-Q00955-EXP-3tz3.pdb1-A-0-A-1.pdb
Q00955	ACAC_YEAST	YNR016C	Q00955	ACAC_YEAST	YNR016C	18	0	Structure	3tz3	2	B	0	95.9	31.9	1480	2191	-	C	0	95.6	31.3	1494	2191	-	Q00955-Q00955-EXP-3tz3.pdb2-B-0-C-0.pdb
Q00955	ACAC_YEAST	YNR016C	Q00955	ACAC_YEAST	YNR016C	19	0	Structure	1od4	1	A	0	93	32.1	1480	2196	-	A	1	93	32.1	1480	2196	-	Q00955-Q00955-EXP-1od4.pdb1-A-0-A-1.pdb
Q00955	ACAC_YEAST	YNR016C	Q00955	ACAC_YEAST	YNR016C	20	0	Structure	1od4	2	B	0	93	32.1	1480	2196	-	C	0	92.9	31.6	1492	2196	-	Q00955-Q00955-EXP-1od4.pdb2-B-0-C-0.pdb
Q00955	ACAC_YEAST	YNR016C	Q00955	ACAC_YEAST	YNR016C	21	0	Structure	3tvw	1	A	0	98	32.1	1480	2195	-	A	1	98	32.1	1480	2195	-	Q00955-Q00955-EXP-3tvw.pdb1-A-0-A-1.pdb
Q00955	ACAC_YEAST	YNR016C	Q00955	ACAC_YEAST	YNR016C	22	0	Structure	3tvw	2	B	0	98	31.8	1480	2189	-	C	0	98	31.3	1495	2192	-	Q00955-Q00955-EXP-3tvw.pdb2-B-0-C-0.pdb
Q00955	ACAC_YEAST	YNR016C	Q00955	ACAC_YEAST	YNR016C	23	0	Structure	3pgq	1	A	0	96.1	32.1	1480	2195	-	A	1	96.1	32.1	1480	2195	-	Q00955-Q00955-EXP-3pgq.pdb1-A-0-A-1.pdb
Q00955	ACAC_YEAST	YNR016C	Q00955	ACAC_YEAST	YNR016C	24	0	Structure	3tv5	1	A	0	95.9	32.1	1480	2195	-	A	1	95.9	32.1	1480	2195	-	Q00955-Q00955-EXP-3tv5.pdb1-A-0-A-1.pdb
Q00955	ACAC_YEAST	YNR016C	Q00955	ACAC_YEAST	YNR016C	25	0	Structure	3h0j	1	A	0	95.4	32	1482	2195	-	A	1	95.4	32	1482	2195	-	Q00955-Q00955-EXP-3h0j.pdb1-A-0-A-1.pdb
Q00955	ACAC_YEAST	YNR016C	Q00955	ACAC_YEAST	YNR016C	26	0	Structure	1w2x	1	A	0	95.4	32	1482	2196	-	A	1	95.4	32	1482	2196	-	Q00955-Q00955-EXP-1w2x.pdb1-A-0-A-1.pdb
Q00955	ACAC_YEAST	YNR016C	Q00955	ACAC_YEAST	YNR016C	27	0	Structure	3tv5	2	B	0	95.9	31.8	1480	2189	-	C	0	96.3	31.4	1492	2192	-	Q00955-Q00955-EXP-3tv5.pdb2-B-0-C-0.pdb
Q00955	ACAC_YEAST	YNR016C	Q00955	ACAC_YEAST	YNR016C	28	0	Structure	3pgq	2	B	0	95.4	31.9	1480	2192	-	C	0	96	31.5	1491	2193	-	Q00955-Q00955-EXP-3pgq.pdb2-B-0-C-0.pdb
Q00955	ACAC_YEAST	YNR016C	Q00955	ACAC_YEAST	YNR016C	29	0	Structure	1w2x	2	B	0	95.3	31.8	1482	2190	-	C	0	95.3	31.3	1492	2190	-	Q00955-Q00955-EXP-1w2x.pdb2-B-0-C-0.pdb
Q00955	ACAC_YEAST	YNR016C	Q00955	ACAC_YEAST	YNR016C	30	0	Structure	3h0j	2	B	0	95.3	31.7	1482	2189	-	C	0	95.3	31.3	1492	2189	-	Q00955-Q00955-EXP-3h0j.pdb2-B-0-C-0.pdb
Q00955	ACAC_YEAST	YNR016C	Q00955	ACAC_YEAST	YNR016C	31	0	Structure	1uys	1	A	0	92.2	31.8	1482	2190	-	A	1	92.2	31.8	1482	2190	-	Q00955-Q00955-EXP-1uys.pdb1-A-0-A-1.pdb
Q00955	ACAC_YEAST	YNR016C	Q00955	ACAC_YEAST	YNR016C	32	0	Structure	1uys	2	B	0	92.2	31.8	1482	2190	-	C	0	92.1	31.3	1492	2190	-	Q00955-Q00955-EXP-1uys.pdb2-B-0-C-0.pdb
P34756	FAB1_YEAST	YFR019W	P34756	FAB1_YEAST	YFR019W	1	0	Dom_dom_model	1gml	-	A	-	26.5	7	858	1022	Cpn60_TCP1	D	-	26.7	7	859	1022	Cpn60_TCP1	P34756-P34756-MDD-Cpn60_TCP1-Cpn60_TCP1-1gml-A-211-378-D-212-378.pdb
Q12230	LSP1_YEAST	YPL004C	Q12230	LSP1_YEAST	YPL004C	1	0	Structure	3plt	2	C	0	100	62.5	52	264	-	C	1	100	62.5	52	264	-	Q12230-Q12230-EXP-3plt.pdb2-C-0-C-1.pdb
Q12230	LSP1_YEAST	YPL004C	Q12230	LSP1_YEAST	YPL004C	2	0	Structure	3plt	1	B	0	96.7	62.8	51	264	-	A	0	100	62.8	51	264	-	Q12230-Q12230-EXP-3plt.pdb1-B-0-A-0.pdb
P53252	PIL1_YEAST	YGR086C	P53252	PIL1_YEAST	YGR086C	1	0	Model	3plt	2	C	0	82.2	62.8	52	264	-	C	1	82.2	62.8	52	264	-	P53252-P53252-MDL-3plt.pdb2-C-0-C-1.pdb
P53252	PIL1_YEAST	YGR086C	P53252	PIL1_YEAST	YGR086C	2	0	Model	3plt	1	B	0	79.4	63.1	51	264	-	A	0	82.2	63.1	51	264	-	P53252-P53252-MDL-3plt.pdb1-B-0-A-0.pdb
P07246	ADH3_YEAST	YMR083W	P07246	ADH3_YEAST	YMR083W	1	0	Model	2hcy	1	B	0	79.5	92.5	29	375	-	B	1	79.5	92.5	29	375	-	P07246-P07246-MDL-2hcy.pdb1-B-0-B-1.pdb
P07246	ADH3_YEAST	YMR083W	P07246	ADH3_YEAST	YMR083W	2	0	Model	2hcy	1	B	0	79.5	92.5	29	375	-	A	0	79.5	92.5	29	375	-	P07246-P07246-MDL-2hcy.pdb1-B-0-A-0.pdb
P07246	ADH3_YEAST	YMR083W	P07246	ADH3_YEAST	YMR083W	3	0	Model	2hcy	1	B	0	79.5	92.5	29	375	-	A	1	79.5	92.5	29	375	-	P07246-P07246-MDL-2hcy.pdb1-B-0-A-1.pdb
P53299	TIM13_YEAST	YGR181W	P57744	TIM8_YEAST	YJR135W-A	1	0	Structure	3cjh	2	I	0	100	51.4	46	99	-	L	0	100	66.7	29	86	-	P53299-P57744-EXP-3cjh.pdb2-I-0-L-0.pdb
P53299	TIM13_YEAST	YGR181W	P57744	TIM8_YEAST	YJR135W-A	2	0	Structure	3cjh	1	E	0	100	49.5	46	97	-	B	0	100	67.8	28	86	-	P53299-P57744-EXP-3cjh.pdb1-E-0-B-0.pdb
P53299	TIM13_YEAST	YGR181W	P57744	TIM8_YEAST	YJR135W-A	3	0	Structure	3cjh	1	A	0	100	49.5	46	97	-	B	0	100	67.8	28	86	-	P53299-P57744-EXP-3cjh.pdb1-A-0-B-0.pdb
P53299	TIM13_YEAST	YGR181W	P57744	TIM8_YEAST	YJR135W-A	4	0	Structure	3cjh	2	I	0	100	51.4	46	99	-	J	0	100	65.5	29	85	-	P53299-P57744-EXP-3cjh.pdb2-I-0-J-0.pdb
P53299	TIM13_YEAST	YGR181W	P57744	TIM8_YEAST	YJR135W-A	5	0	Structure	3cjh	1	C	0	100	49.5	46	97	-	F	0	100	66.7	29	86	-	P53299-P57744-EXP-3cjh.pdb1-C-0-F-0.pdb
P53299	TIM13_YEAST	YGR181W	P57744	TIM8_YEAST	YJR135W-A	6	0	Structure	3cjh	2	K	0	100	49.5	46	97	-	L	0	100	66.7	29	86	-	P53299-P57744-EXP-3cjh.pdb2-K-0-L-0.pdb
P53299	TIM13_YEAST	YGR181W	P57744	TIM8_YEAST	YJR135W-A	7	0	Structure	3cjh	2	G	0	100	49.5	46	97	-	H	0	100	66.7	29	86	-	P53299-P57744-EXP-3cjh.pdb2-G-0-H-0.pdb
P53299	TIM13_YEAST	YGR181W	P57744	TIM8_YEAST	YJR135W-A	8	0	Structure	3cjh	2	K	0	100	49.5	46	97	-	H	0	100	66.7	29	86	-	P53299-P57744-EXP-3cjh.pdb2-K-0-H-0.pdb
P53299	TIM13_YEAST	YGR181W	P57744	TIM8_YEAST	YJR135W-A	9	0	Structure	3cjh	1	E	0	100	49.5	46	97	-	F	0	100	66.7	29	86	-	P53299-P57744-EXP-3cjh.pdb1-E-0-F-0.pdb
P53299	TIM13_YEAST	YGR181W	P57744	TIM8_YEAST	YJR135W-A	10	0	Structure	3cjh	2	G	0	100	49.5	46	97	-	J	0	100	65.5	29	85	-	P53299-P57744-EXP-3cjh.pdb2-G-0-J-0.pdb
P53299	TIM13_YEAST	YGR181W	P57744	TIM8_YEAST	YJR135W-A	11	0	Structure	3cjh	1	C	0	100	49.5	46	97	-	D	0	100	63.2	29	83	-	P53299-P57744-EXP-3cjh.pdb1-C-0-D-0.pdb
P53299	TIM13_YEAST	YGR181W	P57744	TIM8_YEAST	YJR135W-A	12	0	Structure	3cjh	1	A	0	100	49.5	46	97	-	D	0	100	63.2	29	83	-	P53299-P57744-EXP-3cjh.pdb1-A-0-D-0.pdb
P57744	TIM8_YEAST	YJR135W-A	P57744	TIM8_YEAST	YJR135W-A	1	0	Dom_dom_model	3cjh	-	B	-	100	65.5	29	85	zf-Tim10_DDP	E	-	14.8	60.9	33	85	zf-Tim10_DDP	P57744-P57744-MDD-zf-Tim10_DDP-zf-Tim10_DDP-3cjh-B-28-86-E-46-95.pdb
P25374	NFS1_YEAST	YCL017C	P25374	NFS1_YEAST	YCL017C	1	0	Model	3lvm	1	B	0	55.4	78.1	99	486	-	A	0	55.7	79.1	99	491	-	P25374-P25374-MDL-3lvm.pdb1-B-0-A-0.pdb
P25374	NFS1_YEAST	YCL017C	P25374	NFS1_YEAST	YCL017C	2	0	Model	3lvk	1	A	0	55.5	77.9	99	485	-	A	1	55.5	77.9	99	485	-	P25374-P25374-MDL-3lvk.pdb1-A-0-A-1.pdb
P25374	NFS1_YEAST	YCL017C	P25374	NFS1_YEAST	YCL017C	3	0	Model	3lvl	1	B	0	55.4	78.1	99	486	-	B	1	55.4	78.1	99	486	-	P25374-P25374-MDL-3lvl.pdb1-B-0-B-1.pdb
P41808	SMK1_YEAST	YPR054W	P41808	SMK1_YEAST	YPR054W	1	0	Model	1q3d	1	B	0	32.9	86.6	38	373	-	A	0	33.5	86.6	38	373	-	P41808-P41808-MDL-1q3d.pdb1-B-0-A-0.pdb
P41808	SMK1_YEAST	YPR054W	P41808	SMK1_YEAST	YPR054W	2	0	Model	1pyx	1	B	0	33.2	86.6	38	373	-	A	0	32.9	86.6	38	373	-	P41808-P41808-MDL-1pyx.pdb1-B-0-A-0.pdb
P41808	SMK1_YEAST	YPR054W	P41808	SMK1_YEAST	YPR054W	3	0	Model	1h8f	1	B	0	32.6	86.6	38	373	-	A	0	32.6	86.6	38	373	-	P41808-P41808-MDL-1h8f.pdb1-B-0-A-0.pdb
P25379	STDH_YEAST	YCL064C	P25379	STDH_YEAST	YCL064C	1	0	Model	1pwe	9	F	0	38	89.2	7	327	-	E	0	38	89.2	7	327	-	P25379-P25379-MDL-1pwe.pdb9-F-0-E-0.pdb
P25379	STDH_YEAST	YCL064C	P25379	STDH_YEAST	YCL064C	2	0	Model	1pwe	8	D	0	38	89.2	7	327	-	C	0	38	89.2	7	327	-	P25379-P25379-MDL-1pwe.pdb8-D-0-C-0.pdb
Q07500	NDH2_YEAST	YDL085W	Q07500	NDH2_YEAST	YDL085W	1	0	Model	4g6h	1	B	0	45.6	81.8	97	542	-	A	0	45.6	81.8	97	542	-	Q07500-Q07500-MDL-4g6h.pdb1-B-0-A-0.pdb
Q07500	NDH2_YEAST	YDL085W	Q07500	NDH2_YEAST	YDL085W	2	0	Model	4g73	1	B	0	45.6	81.8	97	542	-	A	0	45.6	81.8	97	542	-	Q07500-Q07500-MDL-4g73.pdb1-B-0-A-0.pdb
Q07500	NDH2_YEAST	YDL085W	Q07500	NDH2_YEAST	YDL085W	3	0	Model	4g9k	1	B	0	45.4	81.8	97	542	-	A	0	45.4	81.8	97	542	-	Q07500-Q07500-MDL-4g9k.pdb1-B-0-A-0.pdb
Q01532	BLH1_YEAST	YNL239W	Q01532	BLH1_YEAST	YNL239W	1	0	Structure	2e01	1	A	0	97.1	93.8	30	482	-	A	2	97.1	93.8	30	482	-	Q01532-Q01532-EXP-2e01.pdb1-A-0-A-2.pdb
Q01532	BLH1_YEAST	YNL239W	Q01532	BLH1_YEAST	YNL239W	2	0	Structure	2e01	1	A	2	97.1	93.8	30	482	-	A	4	97.1	93.8	30	482	-	Q01532-Q01532-EXP-2e01.pdb1-A-2-A-4.pdb
Q01532	BLH1_YEAST	YNL239W	Q01532	BLH1_YEAST	YNL239W	3	0	Structure	2e01	1	A	1	97.1	93.8	30	482	-	A	4	97.1	93.8	30	482	-	Q01532-Q01532-EXP-2e01.pdb1-A-1-A-4.pdb
Q01532	BLH1_YEAST	YNL239W	Q01532	BLH1_YEAST	YNL239W	4	0	Structure	2e01	1	A	0	97.1	93.8	30	482	-	A	5	97.1	93.8	30	482	-	Q01532-Q01532-EXP-2e01.pdb1-A-0-A-5.pdb
Q01532	BLH1_YEAST	YNL239W	Q01532	BLH1_YEAST	YNL239W	5	0	Structure	2e01	1	A	1	97.1	93.8	30	482	-	A	2	97.1	93.8	30	482	-	Q01532-Q01532-EXP-2e01.pdb1-A-1-A-2.pdb
Q01532	BLH1_YEAST	YNL239W	Q01532	BLH1_YEAST	YNL239W	6	0	Structure	2e01	1	A	0	97.1	93.8	30	482	-	A	3	97.1	93.8	30	482	-	Q01532-Q01532-EXP-2e01.pdb1-A-0-A-3.pdb
Q01532	BLH1_YEAST	YNL239W	Q01532	BLH1_YEAST	YNL239W	7	0	Structure	2e01	1	A	0	97.1	93.8	30	482	-	A	1	97.1	93.8	30	482	-	Q01532-Q01532-EXP-2e01.pdb1-A-0-A-1.pdb
Q01532	BLH1_YEAST	YNL239W	Q01532	BLH1_YEAST	YNL239W	8	0	Structure	2e01	1	A	2	97.1	93.8	30	482	-	A	3	97.1	93.8	30	482	-	Q01532-Q01532-EXP-2e01.pdb1-A-2-A-3.pdb
Q01532	BLH1_YEAST	YNL239W	Q01532	BLH1_YEAST	YNL239W	9	0	Structure	2e01	1	A	4	97.1	93.8	30	482	-	A	5	97.1	93.8	30	482	-	Q01532-Q01532-EXP-2e01.pdb1-A-4-A-5.pdb
Q01532	BLH1_YEAST	YNL239W	Q01532	BLH1_YEAST	YNL239W	10	0	Structure	2e01	1	A	3	97.1	93.8	30	482	-	A	5	97.1	93.8	30	482	-	Q01532-Q01532-EXP-2e01.pdb1-A-3-A-5.pdb
Q01532	BLH1_YEAST	YNL239W	Q01532	BLH1_YEAST	YNL239W	11	0	Structure	2e01	1	A	3	97.1	93.8	30	482	-	A	4	97.1	93.8	30	482	-	Q01532-Q01532-EXP-2e01.pdb1-A-3-A-4.pdb
Q01532	BLH1_YEAST	YNL239W	Q01532	BLH1_YEAST	YNL239W	12	0	Structure	2e01	1	A	1	97.1	93.8	30	482	-	A	5	97.1	93.8	30	482	-	Q01532-Q01532-EXP-2e01.pdb1-A-1-A-5.pdb
Q01532	BLH1_YEAST	YNL239W	Q01532	BLH1_YEAST	YNL239W	13	0	Structure	3gcb	1	A	0	99.6	93.8	30	482	-	A	1	99.6	93.8	30	482	-	Q01532-Q01532-EXP-3gcb.pdb1-A-0-A-1.pdb
Q01532	BLH1_YEAST	YNL239W	Q01532	BLH1_YEAST	YNL239W	14	0	Structure	3gcb	1	A	0	99.6	93.8	30	482	-	A	3	99.6	93.8	30	482	-	Q01532-Q01532-EXP-3gcb.pdb1-A-0-A-3.pdb
Q01532	BLH1_YEAST	YNL239W	Q01532	BLH1_YEAST	YNL239W	15	0	Structure	3gcb	1	A	1	99.6	93.8	30	482	-	A	4	99.6	93.8	30	482	-	Q01532-Q01532-EXP-3gcb.pdb1-A-1-A-4.pdb
Q01532	BLH1_YEAST	YNL239W	Q01532	BLH1_YEAST	YNL239W	16	0	Structure	3gcb	1	A	2	99.6	93.8	30	482	-	A	3	99.6	93.8	30	482	-	Q01532-Q01532-EXP-3gcb.pdb1-A-2-A-3.pdb
Q01532	BLH1_YEAST	YNL239W	Q01532	BLH1_YEAST	YNL239W	17	0	Structure	3gcb	1	A	3	99.6	93.8	30	482	-	A	5	99.6	93.8	30	482	-	Q01532-Q01532-EXP-3gcb.pdb1-A-3-A-5.pdb
Q01532	BLH1_YEAST	YNL239W	Q01532	BLH1_YEAST	YNL239W	18	0	Structure	3gcb	1	A	1	99.6	93.8	30	482	-	A	5	99.6	93.8	30	482	-	Q01532-Q01532-EXP-3gcb.pdb1-A-1-A-5.pdb
Q01532	BLH1_YEAST	YNL239W	Q01532	BLH1_YEAST	YNL239W	19	0	Structure	3gcb	1	A	0	99.6	93.8	30	482	-	A	5	99.6	93.8	30	482	-	Q01532-Q01532-EXP-3gcb.pdb1-A-0-A-5.pdb
Q01532	BLH1_YEAST	YNL239W	Q01532	BLH1_YEAST	YNL239W	20	0	Structure	3gcb	1	A	2	99.6	93.8	30	482	-	A	4	99.6	93.8	30	482	-	Q01532-Q01532-EXP-3gcb.pdb1-A-2-A-4.pdb
Q01532	BLH1_YEAST	YNL239W	Q01532	BLH1_YEAST	YNL239W	21	0	Structure	3gcb	1	A	3	99.6	93.8	30	482	-	A	4	99.6	93.8	30	482	-	Q01532-Q01532-EXP-3gcb.pdb1-A-3-A-4.pdb
Q01532	BLH1_YEAST	YNL239W	Q01532	BLH1_YEAST	YNL239W	22	0	Structure	3gcb	1	A	0	99.6	93.8	30	482	-	A	2	99.6	93.8	30	482	-	Q01532-Q01532-EXP-3gcb.pdb1-A-0-A-2.pdb
Q01532	BLH1_YEAST	YNL239W	Q01532	BLH1_YEAST	YNL239W	23	0	Structure	3gcb	1	A	4	99.6	93.8	30	482	-	A	5	99.6	93.8	30	482	-	Q01532-Q01532-EXP-3gcb.pdb1-A-4-A-5.pdb
Q01532	BLH1_YEAST	YNL239W	Q01532	BLH1_YEAST	YNL239W	24	0	Structure	3gcb	1	A	1	99.6	93.8	30	482	-	A	2	99.6	93.8	30	482	-	Q01532-Q01532-EXP-3gcb.pdb1-A-1-A-2.pdb
Q01532	BLH1_YEAST	YNL239W	Q01532	BLH1_YEAST	YNL239W	25	0	Structure	2e00	1	A	1	99.8	93.8	30	482	-	A	5	99.8	93.8	30	482	-	Q01532-Q01532-EXP-2e00.pdb1-A-1-A-5.pdb
Q01532	BLH1_YEAST	YNL239W	Q01532	BLH1_YEAST	YNL239W	26	0	Structure	2e00	1	A	0	99.8	93.8	30	482	-	A	1	99.8	93.8	30	482	-	Q01532-Q01532-EXP-2e00.pdb1-A-0-A-1.pdb
Q01532	BLH1_YEAST	YNL239W	Q01532	BLH1_YEAST	YNL239W	27	0	Structure	2e00	1	A	0	99.8	93.8	30	482	-	A	5	99.8	93.8	30	482	-	Q01532-Q01532-EXP-2e00.pdb1-A-0-A-5.pdb
Q01532	BLH1_YEAST	YNL239W	Q01532	BLH1_YEAST	YNL239W	28	0	Structure	2e00	1	A	0	99.8	93.8	30	482	-	A	2	99.8	93.8	30	482	-	Q01532-Q01532-EXP-2e00.pdb1-A-0-A-2.pdb
Q01532	BLH1_YEAST	YNL239W	Q01532	BLH1_YEAST	YNL239W	29	0	Structure	2e00	1	A	4	99.8	93.8	30	482	-	A	5	99.8	93.8	30	482	-	Q01532-Q01532-EXP-2e00.pdb1-A-4-A-5.pdb
Q01532	BLH1_YEAST	YNL239W	Q01532	BLH1_YEAST	YNL239W	30	0	Structure	2e00	1	A	1	99.8	93.8	30	482	-	A	4	99.8	93.8	30	482	-	Q01532-Q01532-EXP-2e00.pdb1-A-1-A-4.pdb
Q01532	BLH1_YEAST	YNL239W	Q01532	BLH1_YEAST	YNL239W	31	0	Structure	2e00	1	A	2	99.8	93.8	30	482	-	A	3	99.8	93.8	30	482	-	Q01532-Q01532-EXP-2e00.pdb1-A-2-A-3.pdb
Q01532	BLH1_YEAST	YNL239W	Q01532	BLH1_YEAST	YNL239W	32	0	Structure	2e00	1	A	3	99.8	93.8	30	482	-	A	5	99.8	93.8	30	482	-	Q01532-Q01532-EXP-2e00.pdb1-A-3-A-5.pdb
Q01532	BLH1_YEAST	YNL239W	Q01532	BLH1_YEAST	YNL239W	33	0	Structure	2e00	1	A	3	99.8	93.8	30	482	-	A	4	99.8	93.8	30	482	-	Q01532-Q01532-EXP-2e00.pdb1-A-3-A-4.pdb
Q01532	BLH1_YEAST	YNL239W	Q01532	BLH1_YEAST	YNL239W	34	0	Structure	2e00	1	A	2	99.8	93.8	30	482	-	A	4	99.8	93.8	30	482	-	Q01532-Q01532-EXP-2e00.pdb1-A-2-A-4.pdb
[truncated: 601 more rows]

## Sheet: 468 binary interactions
Supplemental Table S6. Structural information for 468 binary interactions
[truncated: 469 more rows]

## Sheet: Legend
Column name	Explanation
[truncated: 16 more rows]
